# Supplementary material for: Area Based Conservation Tools Have Mixed Effects Across All SDGs but Research May Overstate Effects
Source: Research Square preprint supplement (doi:10.21203/rs.3.rs-6556547/v1), 2025-05-26
Supplement: Supplementary file 1 [file 0d7bbaf963ebe3972c559499.docx]

**Supplemental Results**

**In-Depth Assessment**

**SDG 1: No Poverty**

Of the 118 papers found to be related to SDG1,11 of the papers could not be assessed, either because their full text could not be found, or they were written in a language other than English. Of the remaining 107 papers, only 54 links were based on evidence found in the papers. Most (n=23, 43%) of these 54 links show mixed effects of MPAs on SDG1 while 17 (31%) focused on positive effects and 14 (26%) focused on negative effects (Figure 5). Similarly, studies that focused on positive effects were multi-site studies (12 of 17 studies), and most studies that focused on positive effects relied solely on secondary data (10 of 17 studies). Of the studies that found only positive effects, only 7 of 17 used primary data. Of these seven studies, two connected positive effects of MPAs outside of their own results (meaning they made that connection by citing other papers in the discussion or conclusion).

Of the studies that focused on negative effects (n=14), six were conducted at local scales (single site) and another six were conducted at multi-site scales. Most studies focused on negative effects used primary data (12 of 14 studies). Of the 14 studies pointing to negative effects, only 2 make this reference in the discussion. Studies indicating mixed effects were predominantly multi-site (17 of 23 studies) with some single site studies (6 of 23 studies), but most studies that focused on mixed effects used primary data (17 of 23 studies). Of these 17 studies, one linked impacts of MPAs on poverty in the discussion and conclusion rather than its own results.

Of the 54 studies that conducted their own analysis, we found 18 to be reliant solely on secondary data. Combining the papers relying solely on secondary data with the 53 papers that did not conduct their own analysis of evidence, we estimate that 59% of studies that purport a relationship between MPAs and SDG 1 relied on previous work, or made recommendations or opinions about the relationship based on secondary data.

We also found that 19 of the 53 papers that did not conduct their own analysis had abstracts that were written to be generally supportive of MPAs on SDG 1. Comparatively, 20 of these 53 papers had abstracts that were written to be cautious of MPAs. Further, we found 10 studies that relied solely on secondary data (out of 18 found positive relationships (instead of negative or mixed), while we found that 2 studies reliant on secondary data found negative relationships. Therefore, we found that 41% of studies that linked MPAs and SDG1 without original analysis asserted positive effects of MPAs on SDG 1, while 31% asserted negative effects.

**SDG 2: Zero Hunger**

Of the 134 papers in the literature review that focused on SDG 2, 14 could not be assessed, either because their full text could not be found, or they were written in another language other than English. Of the remainder, only 43 showed evidence of links with the SDGs and just over half of these (23 of 43) documented positive effects. However of the 23 papers showing positive effects, 16 relied only on secondary data. Papers that focused on positive effects also predominantly focused on multi-site analysis (13 of 23 studies) or conceptual studies (5 of 23 studies). We found that 7 of the 23 studies indicating positive effects utilized primary data, and of these, one made a connection between MPAs and SDG2 in the discussion and conclusions instead of in their own results.

By comparison, we found 9 studies that reported negative effects, all of which used primary data. We noted, however, 2 studies made the link from MPAs to SDG2 in the discussion rather than results. We found 11 studies that found mixed effects, and 6 of these 11 used primary data. One of these studies connects MPA impacts to SDG 2 in its discussion rather than results sections. Studies that highlight negative or mixed effects showed roughly equal focus on single sites (3 out of 9 studies for negative and 4 out of 11 studies for mixed) and multi-site studies (5 out of 9 for negative, and 4 out of 11 for mixed effects).

We found that 21 of the 43 studies that conducted their own analysis were solely reliant on secondary data. Combining these studies with the 77 studies that did not conduct their own analysis, we found that 73% of papers rely on previous studies to link MPAs with SDGs. Further, we found that 16 of the 21 studies reliant on secondary data found a positive effect (rather than negative or mixed) while we found that none of the studies reliant on secondary data found negative effects. Further, we found 45 of the 77 studies that did not do an assessment had abstracts that were generally written in support of MPAs on SDG 2. In contrast, 13 of these 77 studies had abstracts that were written to be generally cautious of MPAs. We therefore estimate that 62% of studies that made claims without original analysis stated or assumed positive relationships between MPAs and SDG 2, while 13% asserted negative effects.

**SDG 5: Gender equality**

SDG 5 was the least-researched SDG area for MPAs, with only 27 studies found to make a link between MPAs and this SDG. Of these 27 studies, only 17 conducted its own analysis to find a link. Most of these papers focused on the negative effects of MPAs on this SDG (10 of 17 studies). We found that 4 of the 10 studies that documented negative impacts were conducted at multi-site levels, 4 of the 10 studies were at local levels, and 2 of the 10 were conceptual studies (literature reviews and a model). Nine of the ten studies focused on negative impacts utilize primary data sources, though two of these studies only linked MPAs to SDG5 in its discussion rather than the results sections.

We found that 5 of the 17 studies highlighted positive effects. We found that 4 of the 5 studies with positive effects focused at multi-site scales and only 1 of the 5 was at a single site. Of the 5 studies that highlight positive effects, two relied solely on secondary data. Of the three studies focused on positive effects that used primary data, one connected MPAs with SDG 5 in its discussion rather than results, referencing previous work. Only two studies of 17 highlighted both positive and negative effects, with one a literature review. Only one study documenting mixed effects used primary data, with a multi-site scope.

We found that 4 of the 17 studies that conducted their own analysis were solely reliant on secondary data. Adding this number with the 10 studies that claimed relationships between MPAs and SDG5 without conducting analysis, we estimate that 52% of the 27 studies that claimed relationships between MPAs and SDG 5 rely on previous studies. Further, we found that 2 of the 4 studies reliant on secondary data found positive relationships (rather than negative or mixed), and 2 of the 10 studies that assumed relationships (without conducting their own analysis) were found to have abstracts written generally supportive of MPAs on SDG 5. Therefore, we estimate that 29% of studies that made claims without original data assumed positive relationships. In comparison, we found that 6 of the 10 studies that did not conduct analysis had abstracts generally cautious of MPAs, and 1 of the 4 studies reliant on secondary data found negative effects of MPAs. Therefore, we estimate that 50% of papers that made claims without original data asserted negative effects.

Supplemental Tables

Table S1: The Sustainable Development Goals

| **Sustainable Development Goal** | **Description** |
| --- | --- |
| 1: No Poverty | End poverty in all its forms everywhere |
| 2: Zero Hunger | End hunger, achieve food security and improved nutrition and promote sustainable agriculture |
| 3: Good Health and Well-being | Ensure healthy lives and promote well-being for all at all ages |
| 4: Quality Education | Ensure inclusive and equitable quality education and promote lifelong learning opportunities for all |
| 5: Gender Equality | Achieve gender equality and empower all women and girls |
| 6: Clean Water and Sanitation | Ensure availability and sustainable management of water and sanitation for all |
| 7: Affordable and Clean Energy | Ensure access to affordable, reliable, sustainable and modern energy for all |
| 8: Decent Work and Economic Growth | Promote sustained, inclusive and sustainable economic growth, full and productive employment and decent work for all |
| 9: Industry, Innovation, and Infrastructure | Build resilient infrastructure, promote inclusive and sustainable industrialization and foster innovation |
| 10: Reduced Inequalities | Reduce inequality within and among countries |
| 11: Sustainable Cities and Communities | Make cities and human settlements inclusive, safe, resilient and sustainable |
| 12: Responsible Consumption and Production | Ensure sustainable consumption and production patterns |
| 13: Climate Action | Take urgent action to combat climate change and its impacts |
| 14: Life Below Water | Conserve and sustainably use the oceans, seas and marine resources for sustainable development |
| 15: Life on Land | Protect, restore and promote sustainable use of terrestrial ecosystems, sustainably manage forests, combat desertification, and halt and reverse land degradation and halt biodiversity loss |
| 16: Peace, Justice and Strong Institutions | Promote peaceful and inclusive societies for sustainable development, provide access to justice for all and build effective, accountable and inclusive institutions at all levels |
| 17: Partnerships for the Goals | Strengthen the means of implementation and revitalize the global partnerships for sustainable development |

Table S2: The number of relevant papers found and the proportion reviewed for the evidence assessment overview. Individual papers could link with multiple SDGs. SDGs in bold indicate the three SDGs of particular interest for our study.

| **Sustainable Development Goal** | Number of Papers in database | Proportion of Papers sampled for evidence assessment overview across SDGs |
| --- | --- | --- |
| **1: No Poverty** | 118 | 0.17 |
| **2: Zero Hunger** | 134 | 0.15 |
| 3: Good Health and Well-being | 78 | 0.25 |
| 4: Quality Education | 81 | 0.25 |
| **5: Gender Equality** | 27 | 0.74 |
| 6: Clean Water and Sanitation | 107 | 0.19 |
| 7: Affordable and Clean Energy | 47 | 0.42 |
| 8: Decent Work and Economic Growth | 376 | 0.05 |
| 9: Industry, Innovation, and Infrastructure | 308 | 0.06 |
| 10: Reduced Inequalities | 118 | 0.17 |
| 11: Sustainable Cities and Communities | 228 | 0.07 |
| 12: Responsible Consumption and Production | 356 | 0.06 |
| 13: Climate Action | 240 | 0.08 |
| 14: Life Below Water | 2012 | 0.01 |
| 15: Life on Land | 209 | 0.1 |
| 16: Peace, Justice and Strong Institutions | 242 | 0.08 |
| 17: Partnerships for the Goals | 141 | 0.14 |
| Total | 4867 | 0.07 |

**Table S3**

| **SDG** | | **Target #** | **Target description** | **References to support MPA-SDG link** |
| --- | --- | --- | --- | --- |
| **1** | **No Poverty** | **1.01** | **By 2030, eradicate extreme poverty for all people everywhere, currently  measured as people living on less than $1.25 a day** | **Gurney, G.G., Cinner, J., Ban, N.C., Pressey, R.L., Pollnac, R., Campbell, S.J., Tasidjawa, S. and Setiawan, F., 2014. Poverty and protected areas: an evaluation of a marine integrated conservation and development project in Indonesia. Global Environmental Change, 26, pp.98-107.  Raycraft, J., 2019. Conserving poverty: Destructive fishing gear use in a Tanzanian marine protected area. Conservation & Society, 17(3), pp.297-309.  Moshy, V.H., Bryceson, I., Mwaipopo, R. 2015. Social-ecological Changes, Livelihoods and Resilience Among Fishing Communities in Mafia Island Marine Park, Tanzania. Forum for Development Studies, 42, p. 529-553.  Cavalcante de Oliveria Junior, J.G., Campos-Silva, J.V, Vinhas Santos, D.T., Ladle, R.J., de Silva Batista, V. 2021. Quantifying anthropogenic threats affecting Marine Protected Areas in developing countries. Journal of Environmental Management, 279, 111614.   Kamatm, V. 2014. "The Ocean is our Farm": Marine Conservation, Food Insecurity, and Social Suffering in Southeastern Tanzania. Human Organisation, 73, p 289-298.** |
| **1** | **No Poverty** | **1.02** | **By 2030, reduce at least by half the proportion of men, women and  children of all ages living in poverty in all its dimensions according to national definitions** | **Gurney, G.G., Cinner, J., Ban, N.C., Pressey, R.L., Pollnac, R., Campbell, S.J., Tasidjawa, S. and Setiawan, F., 2014. Poverty and protected areas: an evaluation of a marine integrated conservation and development project in Indonesia. Global Environmental Change, 26, pp.98-107.  Chircop, A., Francis, J., van der Elst, R., Pacule, H., Guerreiro, J., Grilo, C., Carneiro, G., 2009. Governance of Marine Protected Areas in East Africa: A Comparative Study of Mozambique, South Africa, and Tanzania. Ocean Development and International Law, 41, p.1-33.  Ward, M., Possingham, H., Rhodes, J.R. and Mumby 2018. Food, money and lobsters: Valuing ecosystem services to align environmental management with Sustainable Development Goals. Ecosystem services, 29 p.56-69.  Brunce, M., Brown, K. and Rosendo, S. 2010. Policy misfits, climate change and cross-scale vulnerability in coastal Africa: how development projects undermine resilience. Environmental Science and Policy, 13, p.485-497.  Darling, E. S. 2014. Assessing the Effect of Marine Reserves on Household Food Security in Kenyan Coral Reef Fishing Communities, PLOS ONE,  https://doi.org/10.1371/journal.pone.0113614** |
| **1** | **No Poverty** | **1.03** | **Implement nationally appropriate social protection systems and  measures for all, including floors, and by 2030 achieve substantial coverage of the poor and the vulnerable** |  |
| **1** | **No Poverty** | **1.04** | **By 2030, ensure that all men and women, in particular the poor and the  vulnerable, have equal rights to economic resources, as well as access to basic services, ownership and control over land and other forms of property, inheritance, natural resources, appropriate new technology and financial services, including microfinance** | **De Santo, E.M., Jones, P.J. and Miller, A.M.M., 2011. Fortress conservation at sea: a commentary on the Chagos marine protected area. Marine Policy, 35(2), pp.258-260.  Richmond, L. and Kotowicz, D., 2015. Equity and access in marine protected areas: The history and future of ‘traditional indigenous fishing’in the Marianas Trench Marine National Monument. Applied Geography, 59, pp.117-124.  Kleiber, D., Harris, L. and Vincent, A.C., 2018. Gender and marine protected areas: a case study of Danajon Bank, Philippines. Maritime Studies, 17(2), pp.163-175.  Retka, J., Jepson, P., Ladle, R.J., Malhado, A.C., Vieira, F.A., Normande, I.C., Souza, C.N., Bragagnolo, C. and Correia, R.A., 2019. Assessing cultural ecosystem services of a large marine protected area through social media photographs. Ocean & Coastal Management, 176, pp.40-48.  Hill, L.S., Johnson, J.A. and Adamowski, J., 2016. Meeting Aichi Target 11: Equity considerations in marine protected areas design. Ocean & Coastal Management, 134, pp.112-119.** |
| **1** | **No Poverty** | **1.05** | **By 2030, build the resilience of the poor and those in vulnerable  situations and reduce their exposure and vulnerability to climate-related extreme events and other economic, social and environmental shocks and disasters** | **Micheli, F., Saenz-Arroyo, A., Greenley, A., Vazquez, L., Montes, J.A.E., Rossetto, M. and De Leo, G.A., 2012. Evidence that marine reserves enhance resilience to climatic impacts. PloS one, 7(7), p.e40832.  Bates, A.E., Cooke, R.S., Duncan, M.I., Edgar, G.J., Bruno, J.F., Benedetti-Cecchi, L., Côté, I.M., Lefcheck, J.S., Costello, M.J., Barrett, N. and Bird, T.J., 2019. Climate resilience in marine protected areas and the ‘Protection Paradox’. Biological Conservation, 236, pp.305-314.  Masud, M.M., Kari, F.B., Yahaya, S.R.B. and Al-Amin, A.Q. 2014. Impact of residents' livelihoods on attitudes towards environmental conservation behaviour: An empirical investigation of Tioman Island Marine Park area, Malaysia. Ocean and Coastal Management, 93, p.7-14.  Mcleod, E., Burton-Adams, M., Forster, J., Franco, C., Gaines, G., Gorong, G., James, R., Posing-Kuwaum, G., Tara, M. and Terk, E. 2019. Lessons From the Pacific Islands – Adapting to Climate Change by Supporting Social and Ecological Resilience. Frontiers in Marie Science, https://doi.org/10.3389/fmars.2019.00289  Weeks, R. and Jupiter, S.D. 2013. Adaptive Comanagement of a Marine Protected Area Network in Fiji. Conservation Biology, 27, p.1234-1244.** |
| **1** | **No Poverty** | **1.A** | **Ensure significant mobilization of resources from a variety of sources,  including through enhanced development cooperation, in order to provide adequate and predictable means for developing countries, in particular least developed countries, to implement programmes and policies to end poverty in all its dimensions** |  |
| **1** | **No Poverty** | **1.B** | **Create sound policy frameworks at the national, regional and  international levels, based on pro-poor and gender-sensitive development strategies, to support accelerated investment in poverty eradication actions** |  |
| **2** | **Zero hunger** | **2.01** | **By 2030, end hunger and ensure access by all people, in particular the  poor and people in vulnerable situations, including infants, to safe, nutritious and sufficient food all year round.** | **Alva, S., Johnson, K., Jacob, A., D’Agnes, H., Mantovani, R. and Evans, T., 2016. Marine protected areas and children’s dietary diversity in the Philippines. Population and environment, 37(3), pp.341-361.  Gill, D.A., Cheng, S.H., Glew, L., Aigner, E., Bennett, N.J. and Mascia, M.B., 2019. Social synergies, tradeoffs, and equity in marine conservation impacts. Annual Review of Environment and Resources, 44, pp.347-372.  Aldon, Ma. T.E., Fermin, A.C., Agbayani, R.F. 2011. Socio-cultural context of fishers' participation in coastal resources management in Anini-y, Antique in west central Philippines. Fisheries research, 107, p. 112-121.  Moshy, V.H., Bryceson, I., Mwaipopo, R. 2015. Social-ecological Changes, Livelihoods and Resilience Among Fishing Communities in Mafia Island Marine Park, Tanzania. Forum for Development Studies, 42, p. 529-553.  Costello, C. and Ovando, D. Status, Insitutions, and Prospects for Global Capture Fisheries. Annual Review of Environment and Resources, 44, p177-200.  Anabieza, M., Pajaro, M., Reyes, G., Tiburcio, F. and Watts, P. 2010. Philippine Alliance of Fisherfolk: Ecohealth Practitioners for Livelihood and Food Security. EcoHealth, 7, p.394-399.** |
| **2** | **Zero hunger** | **2.02** | **By 2030, end all forms of malnutrition, including achieving, by 2025, the  internationally agreed targets on stunting and wasting in children under 5 years of age, and address the nutritional needs of adolescent girls, pregnant and lactating women and older persons.** |  |
| **2** | **Zero hunger** | **2.03** | **By 2030, double the agricultural productivity and incomes of small-scale  food producers, in particular women, indigenous peoples, family farmers, pastoralists and fishers, including through secure and equal access to land, other productive resources and inputs, knowledge, financial services, markets and opportunities for value addition and non-farm employment.** | **Bennett, N.J., Calò, A., Di Franco, A., Niccolini, F., Marzo, D., Domina, I., Dimitriadis, C., Sobrado, F., Santoni, M.C., Charbonnel, E. and Trujillo, M., 2020. Social equity and marine protected areas: Perceptions of small-scale fishermen in the Mediterranean Sea.   Biological Conservation, 244, p.108531.  Klein, E.S. and Watters, G.M., 2020. What’s the catch? Profiling the benefits and costs associated with marine protected areas and displaced fishing in the Scotia Sea. PloS one, 15(8), p.e0237425.  Mascia, M.B., Claus, C.A. and Naidoo, R., 2010. Impacts of marine protected areas on fishing communities. Conservation Biology, 24(5), pp.1424-1429.  Robles-Zavala, E. 2014. Coastal livelihoods, poverty and well-being in Mexico. A case study of institutional and social constraints. Journal of Coastal Conservation, 18, p.431-448.  Unsworth, R.K.F., Hinder, S.L., Bodger, I.G. and Cullen-Unsworth, L.C. 2014. Food supply depends on seagrass meadows in the coral triangle. Environmental Research Letters, 9, 094005.  +G21** |
| **2** | **Zero hunger** | **2.04** | **By 2030, ensure sustainable food production systems and implement  resilient agricultural practices that increase productivity and production, that help maintain ecosystems, that strengthen capacity for adaptation to climate change, extreme weather, drought, flooding and other disasters and that progressively improve land and soil quality.** | **McClure, E.C., Sievers, K.T., Abesamis, R.A., Hoey, A.S., Alcala, A.C. and Russ, G.R., 2020. Higher fish biomass inside than outside marine protected areas despite typhoon impacts in a complex reefscape. Biological Conservation, 241, p.108354.  Cinner, JE 2009. Poverty and the use of destructive fishing gear near east African marine protected areas. Environmental Conservation, 36, p: 321-326  Mcleod, E., Burton-Adams, M., Forster, J., Franco, C., Gaines, G., Gorong, G., James, R., Posing-Kuwaum, G., Tara, M. and Terk, E. 2019. Lessons From the Pacific Islands – Adapting to Climate Change by Supporting Social and Ecological Resilience. Frontiers in Marie Science, https://doi.org/10.3389/fmars.2019.00289  Tregarot, E., Catry, T., Pottier, A., El-Hacen, E, M., Cheikh, M.A.S., Cornet, C.C., Marechal, JP., Failer, P. 2021. Coastal protection assessment: a tradeoff between ecological, social, and economic issues. Ecosphere, 12, e03364.  Rosegrant, M.W., Dey, M.M., Valmonte-Santos, R., Chen, O.L. 2016. Economic impacts of climate change and climate change adaptation strategies in Vanuatu and Timor-Leste. Marine Policy, 67, p.179-188.** |
| **2** | **Zero hunger** | **2.05** | **By 2020, maintain the genetic diversity of seeds, cultivated plants and  farmed and domesticated animals and their related wild species, including through soundly managed and diversified seed and plant banks at the national, regional and international levels, and promote access to and fair and equitable sharing of benefits arising from the utilization of genetic resources and associated traditional knowledge, as internationally agreed.** |  |
| **2** | **Zero hunger** | **2.A** | **Increase investment, including through enhanced international  cooperation, in rural infrastructure, agricultural research and extension services, technology development and plant and livestock gene banks in order to enhance agricultural productive capacity in developing countries, in particular least developed countries.** |  |
| **2** | **Zero hunger** | **2.B** | **Correct and prevent trade restrictions and distortions in world  agricultural markets, including through the parallel elimination of all forms of agricultural export subsidies and all export measures with equivalent effect, in accordance with the mandate of the Doha Development Round.** |  |
| **2** | **Zero hunger** | **2.C** | **Adopt measures to ensure the proper functioning of food commodity  markets and their derivatives and facilitate timely access to market information, including on food reserves, in order to help limit extreme food price volatility.** |  |
| **3** | **Good health and  well-being** | **3.01** | **By 2030, reduce the global maternal mortality ratio to less than 70 per  100,000 live births.** |  |
| **3** | **Good health and  well-being** | **3.02** | **By 2030, end preventable deaths of newborns and children under 5  years of age, with all countries aiming to reduce neonatal mortality to at least as low as 12 per 1,000 live births and under-5 mortality to at least as low as 25 per 1,000 live births.** | **Alva, S., Johnson, K., Jacob, A., D’Agnes, H., Mantovani, R. and Evans, T., 2016. Marine protected areas and children’s dietary diversity in the Philippines. Population and environment, 37(3), pp.341-361.  Gjertsen, H. 2005. Can Habitat Protection Lead to Improvements in Human Well-Being? Evidence from Marine Protected Areas in the Philippines. World Development, 33, p.199-217.  Jones, J.P.G., Andriahajanina, F.B., Ranambinintsoa, E.H., Hockley, N.J. and Ravoahangimalala, O. 2006. The economic importance of freshwater crayfish harvesting in Madagascar and the potential of community-based conservation to improve management. Oryx, 40, p.168-175.  Kinshella, M-L. W. 2012. ‘The land is now not fertile’: social landscapes of hunger in south-eastern coastal Tanzania. Anthropology and Medicine, 21, p.290-301.  Landrigan, P.J., Stegeman, J.J., Fleming, L.E., Allemand, D., Anderson, D.M., Backer, L.C., Brucker-Davis, F., Chevalier, N., Corra, L., Czerucka, D., Bottein, M.-Y.D., Demeneix, B., Depledge, M., Deheyn, D.D., Dorman, C.J., Fénichel, P., Fisher, S., Gaill, F., Galgani, F., Gaze, W.H., Giuliano, L., Grandjean, P., Hahn, M.E., Hamdoun, A., Hess, P., Judson, B., Laborde, A., McGlade, J., Mu, J., Mustapha, A., Neira, M., Noble, R.T., Pedrotti, M.L., Reddy, C., Rocklöv, J., Scharler, U.M., Shanmugam, H., Taghian, G., van de Water, J.A.J.M., Vezzulli, L., Weihe, P., Zeka, A., Raps, H. and Rampal, P., 2020. Human Health and Ocean Pollution. Annals of Global Health, 86, p.151** |
| **3** | **Good health and  well-being** | **3.03** | **By 2030, end the epidemics of AIDS, tuberculosis, malaria and  neglected tropical diseases and combat hepatitis, water-borne diseases and other communicable diseases.** |  |
| **3** | **Good health and  well-being** | **3.04** | **By 2030, reduce by one third premature mortality from  non-communicable diseases through prevention and treatment and promote mental health and well-being.** | **Ban, N.C., Gurney, G.G., Marshall, N.A., Whitney, C.K., Mills, M., Gelcich, S., Bennett, N.J., Meehan, M.C., Butler, C., Ban, S. and Tran, T.C., 2019. Well-being outcomes of marine protected areas. Nature Sustainability, 2(6), pp.524-532.  Golden et al. 2019. Cohort Description of the Madagascar Health and Environmental Research–Antongil (MAHERY–Antongil) Study in Madagascar. Froniers in Nutrition, 6:109. doi: 10.3389/fnut.2019.00109  Jenkins, A., Horwitz, P. and Arabena, K. My island home: place-based integration of conservation and public health in Oceania. Environmental Conservation, 45, p.125-136  Landrigan, P.J., Stegeman, J.J., Fleming, L.E., Allemand, D., Anderson, D.M., Backer, L.C., Brucker-Davis, F., Chevalier, N., Corra, L., Czerucka, D., Bottein, M.-Y.D., Demeneix, B., Depledge, M., Deheyn, D.D., Dorman, C.J., Fénichel, P., Fisher, S., Gaill, F., Galgani, F., Gaze, W.H., Giuliano, L., Grandjean, P., Hahn, M.E., Hamdoun, A., Hess, P., Judson, B., Laborde, A., McGlade, J., Mu, J., Mustapha, A., Neira, M., Noble, R.T., Pedrotti, M.L., Reddy, C., Rocklöv, J., Scharler, U.M., Shanmugam, H., Taghian, G., van de Water, J.A.J.M., Vezzulli, L., Weihe, P., Zeka, A., Raps, H. and Rampal, P., 2020. Human Health and Ocean Pollution. Annals of Global Health, 86, p.151.** |
| **3** | **Good health and  well-being** | **3.05** | **Strengthen the prevention and treatment of substance abuse, including  narcotic drug abuse and harmful use of alcohol.** |  |
| **3** | **Good health and  well-being** | **3.06** | **By 2020, halve the number of global deaths and injuries from road traffic  accidents.** |  |
| **3** | **Good health and  well-being** | **3.07** | **By 2030, ensure universal access to sexual and reproductive  health-care services, including for family planning, information and education, and the integration of reproductive health into national strategies and programmes.** |  |
| **3** | **Good health and  well-being** | **3.08** | **Achieve universal health coverage, including financial risk protection,  access to quality essential health-care services and access to safe, effective, quality and affordable essential medicines and vaccines for all.** |  |
| **3** | **Good health and  well-being** | **3.09** | **By 2030, substantially reduce the number of deaths and illnesses from  hazardous chemicals and air, water and soil pollution and contamination.** |  |
| **3** | **Good health and  well-being** | **3.A** | **Strengthen the implementation of the World Health Organization  Framework Convention on Tobacco Control in all countries, as appropriate.** |  |
| **3** | **Good health and  well-being** | **3.B** | **Support the research and development of vaccines and medicines for  the communicable and noncommunicable diseases that primarily affect developing countries, provide access to affordable essential medicines and vaccines, in accordance with the Doha Declaration on the TRIPS Agreement and Public Health, which affirms the right of developing countries to use to the full the provisions in the Agreement on Trade Related Aspects of Intellectual Property Rights regarding flexibilities to protect public health, and, in particular, provide access to medicines for all.** |  |
| **3** | **Good health and  well-being** | **3.C** | **Substantially increase health financing and the recruitment,  development, training and retention of the health workforce in developing countries, especially in least developed countries and small island developing States.** |  |
| **3** | **Good health and  well-being** | **3.D** | **Strengthen the capacity of all countries, in particular developing  countries, for early warning, risk reduction and management of national and global health risks.** |  |
| **4** | **Quality education** | **4.01** | **By 2030, ensure that all girls and boys complete free, equitable and  quality primary and secondary education leading to relevant and Goal-4 effective learning outcomes** |  |
| **4** | **Quality education** | **4.02** | **By 2030, ensure that all girls and boys have access to quality early  childhood development, care and preprimary education so that they are ready for primary education** |  |
| **4** | **Quality education** | **4.03** | **By 2030, ensure equal access for all women and men to affordable and  quality technical, vocational and tertiary education, including university** |  |
| **4** | **Quality education** | **4.04** | **By 2030, substantially increase the number of youth and adults who  have relevant skills, including technical and vocational skills, for employment, decent jobs and entrepreneurship** | **Chen, D., Garmulewicz, A., Merner, C., Elphinstone, C., Leggott, C. and Dewar, H., 2019. Encouraging youth engagement in marine protected areas: A survey of best practices in Canada. Aquatic Conservation: Marine and Freshwater Ecosystems, 29, pp.223-232.  Leisher, C., Mangubhai, S., Hess, S., Widodo, H., Soekirman, T., Tjoe, S., Wawiyai, S., Larsen, S.N., Rumetna, L., Halim, A. and Sanjayan, M., 2012. Measuring the benefits and costs of community education and outreach in marine protected areas. Marine Policy, 36(5), pp.1005-1011.  Plummer, K.L., De Witt, P. 2004. St. Eustatius Marine Park: a case of MPA problems and solutions in the Caribbean. Proceedings of the Gulf and Caribbean Fisheries Institute, 55, p675-684.  Kamat, V.R. 2019. Dynamite Fishing in a Marine Protected Area in Tanzania: Why Youth Perceptions Matter. Coastal Management, 47, p.387-405.  Mascia, M.B. 2010. Governance of Marine Protected Areas in the Wider Caribbean: Preliminary Results of an International Mail Survey. Coastal Management, 27, p. 391-402.** |
| **4** | **Quality education** | **4.05** | **By 2030, eliminate gender disparities in education and ensure equal  access to all levels of education and vocational training for the vulnerable, including persons with disabilities, indigenous peoples and children in vulnerable situations** |  |
| **4** | **Quality education** | **4.06** | **By 2030, ensure that all youth and a substantial proportion of adults,  both men and women, achieve literacy and numeracy** |  |
| **4** | **Quality education** | **4.07** | **By 2030, ensure that all learners acquire the knowledge and skills  needed to promote sustainable development, including, among others, through education for sustainable development and sustainable lifestyles, human rights, gender equality, promotion of a culture of peace and non-violence, global citizenship and appreciation of cultural diversity and of culture’s contribution to sustainable development** | **Chen, D., Garmulewicz, A., Merner, C., Elphinstone, C., Leggott, C. and Dewar, H., 2019. Encouraging youth engagement in marine protected areas: A survey of best practices in Canada. Aquatic Conservation: Marine and Freshwater Ecosystems, 29, pp.223-232.  Leisher, C., Mangubhai, S., Hess, S., Widodo, H., Soekirman, T., Tjoe, S., Wawiyai, S., Larsen, S.N., Rumetna, L., Halim, A. and Sanjayan, M., 2012. Measuring the benefits and costs of community education and outreach in marine protected areas. Marine Policy, 36(5), pp.1005-1011.  Bennett, N.J. and Dearden, P., 2014. Why local people do not support conservation: Community perceptions of marine protected area livelihood impacts, governance and management in Thailand. Marine policy, 44, pp.107-116.  Yusah, H.M., Shuib, A., Kunasekaran, P., Nordin, N.A. 2018. FACTORS INFLUENCING RESIDENTS’ ATTITUDE TOWARDS MARINE RESOURCE UTILIZATION IN TUN SAKARAN MARINE PARK, MALAYSIA. International Journal of Business and Society, 19, p. 37-46.  Wynveen, C.J., Wynveen, B.J, Sutton, S.G. 2015. Applying the Value-Belief-Norm Theory to Marine Contexts: Implications for Encouraging Pro-Environmental Behavior. Coastal Management, 43, p. 84-103.** |
| **4** | **Quality education** | **4.A** | **Build and upgrade education facilities that are child, disability and  gender sensitive and provide safe, nonviolent, inclusive and effective learning environments for all** |  |
| **4** | **Quality education** | **4.B** | **By 2020, substantially expand globally the number of scholarships  available to developing countries, in particular least developed countries, small island developing States and African countries, for enrolment in higher education, including vocational training and information and communications technology, technical, engineering and scientific programmes, in developed countries and other developing countries** |  |
| **4** | **Quality education** | **4.C** | **By 2030, substantially increase the supply of qualified teachers,  including through international cooperation for teacher training in developing countries, especially least developed countries and small island developing states** |  |
| **5** | **Gender equality** | **5.01** | **End all forms of discrimination against all women and girls everywhere** | **Clabots, B.M., 2013. Gender dimensions of community-based management of marine protected areas in Siquijor, Philippines (Doctoral dissertation).  Kleiber, D., Harris, L. and Vincent, A.C., 2018. Gender and marine protected areas: a case study of Danajon Bank, Philippines. Maritime Studies, 17(2), pp.163-175.  Endemano Walker, B.L. and Robinson, M.A. 2009. Economic development, marine protected areas and gendered access to fishing resources in a Polynesian lagoon. Gender, Place and Culture, 16, p. 467-484.  Ladia, J., Malenab, M.C.T., Visco, E.S. 2019. Bridging the Gap between Gender and Marine Conservation: The Case of Calatagan Mangrove Forest Conservation Park in Batangas, Philippines. Pertanika Journal of Social Science and Humanities, 27, p. 193-213.  Parsons, M., Taylor, L., Crease, R. 2021. Indigenous Environmental Justice within Marine Ecosystems: A Systematic Review of the Literature on Indigenous Peoples’ Involvement in Marine Governance and Management. Sustainability, 13, p. 4217.** |
| **5** | **Gender equality** | **5.02** | **Eliminate all forms of violence against all women and girls in the public  and private spheres, including trafficking and sexual and other types of exploitation** |  |
| **5** | **Gender equality** | **5.03** | **Eliminate all harmful practices, such as child, early and forced marriage  and female genital mutilation** |  |
| **5** | **Gender equality** | **5.04** | **Recognize and value unpaid care and domestic work through the  provision of public services, infrastructure and social protection policies and the promotion of shared responsibility within the household and the family as nationally appropriate** |  |
| **5** | **Gender equality** | **5.05** | **Ensure women’s full and effective participation and equal opportunities  for leadership at all levels of decisionmaking in political, economic and public life** | **Clabots, B.M., 2013. Gender dimensions of community-based management of marine protected areas in Siquijor, Philippines (Doctoral dissertation).  Kleiber, D., Harris, L. and Vincent, A.C., 2018. Gender and marine protected areas: a case study of Danajon Bank, Philippines. Maritime Studies, 17(2), pp.163-175.  Baker-Médard, M., 2017. Gendering marine conservation: the politics of marine protected areas and fisheries access. Society & Natural Resources, 30(6), pp.723-737.  Crawford, B. et al. 2010. Small Scale Fisheries Management: Lessons from Cockle Harvesters in Nicaragua and Tanzania. Coastal Management, 38, p. 195-215.  Ramirez, A., Ortiz, M., Steenbeek, J., Christensen, V. 2015. Evaluation of the effects on rockfish and kelp artisanal fisheries of the proposed Mejillones Peninsula marine protected area (northern Chile, SE Pacific coast). Ecological Modelling, 297, p. 141-153.** |
| **5** | **Gender equality** | **5.06** | **Ensure universal access to sexual and reproductive health and  reproductive rights as agreed in accordance with the Programme of Action of the International Conference on Population and Development and the Beijing Platform for Action and the outcome documents of their review conferences** |  |
| **5** | **Gender equality** | **5.A** | **Undertake reforms to give women equal rights to economic resources,  as well as access to ownership and control over land and other forms of property, financial services, inheritance and natural resources, in accordance with national laws** | **King, M. and Faasili, U. 2001. Community-based management of subsistence fisheries in Samoa. Fisheries Management and Ecology, 6, p. 133-144.  Kamat, V.R. and Kinshella, M-L.W. 2018. Food insecurity and coping strategies in a marine protected area in southeastern Tanzania. Ecology of Food and Nutrition, 57, p. 187-205.** |
| **5** | **Gender equality** | **5.B** | **Enhance the use of enabling technology, in particular information and  communications technology, to promote the empowerment of women** |  |
| **5** | **Gender equality** | **5.C** | **Adopt and strengthen sound policies and enforceable legislation for the  promotion of gender equality and the empowerment of all women and girls at all levels** |  |
| **6** | **Clean water and  sanitation** | **6.01** | **By 2030, achieve universal and equitable access to safe and affordable  drinking water for all** |  |
| **6** | **Clean water and  sanitation** | **6.02** | **By 2030, achieve access to adequate and equitable sanitation and  hygiene for all and end open defecation, paying special attention to the needs of women and girls and those in vulnerable situations** |  |
| **6** | **Clean water and  sanitation** | **6.03** | **By 2030, improve water quality by reducing pollution, eliminating  dumping and minimizing release of hazardous chemicals and materials, halving the proportion of untreated wastewater and substantially increasing recycling and safe reuse globally** | **Abessa, D.M., Albuquerque, H.C., Morais, L.G., Araujo, G.S., Fonseca, T.G., Cruz, A.C., Campos, B.G., Camargo, J.B., Gusso-Choueri, P.K., Perina, F.C. and Choueri, R.B., 2018. Pollution status of marine protected areas worldwide and the consequent toxic effects are unknown. Environmental Pollution, 243, pp.1450-1459.  Zann, L.P. 2000, The Eastern Australian Region: a Dynamic Tropical/Temperate Biotone. Marine Pollution Bulletin, 41, p.188-203  Robertson, L. 2001. Integrated management of marine protected areas in Grenada. PROCEEDINGS OF THE FIFTY-FOURTH ANNUAL GULF AND CARIBBEAN FISHERIES INSTITUTE  Braga Castro, I., Bender Machado, F., Tavares de Sousa, G., Paz-Villarraga, C., Fillmann, G. 278. How protected are marine protected areas: A case study of tributyltin in Latin America. Journal of Environmental Management, 278, 111543.  Lamb, J.B., Wenger, A.S., Devlin, M.J., Ceccarelli, D.M., Williamson, D.H., Willis, B, L. 2016. Reserves as tools for alleviating impacts of marine disease. Philosophical Transactions of the Royl Society B, 371, (1689).** |
| **6** | **Clean water and  sanitation** | **6.04** | **By 2030, substantially increase water-use efficiency across all sectors  and ensure sustainable withdrawals and supply of freshwater to address water scarcity and substantially reduce the number of people suffering from water scarcity** |  |
| **6** | **Clean water and  sanitation** | **6.05** | **By 2030, implement integrated water resources management at all  levels, including through transboundary cooperation as appropriate** |  |
| **6** | **Clean water and  sanitation** | **6.06** | **By 2020, protect and restore water-related ecosystems, including  mountains, forests, wetlands, rivers, aquifers and lakes** | **Zann, L.P. 2000. The Eastern Australian Region: a Dynamic Tropical/Temperate Biotone. Marine Pollution Bulletin, 41, p. 188-203.  Wenger, A.s., Williamson, D.H., da Silva, E.T., Ceccarelli, D.M., Browne, N.K., Petus, C., Devlin, M.J. 2015. Effects of reduced water quality on coral reefs in and out of no-take marine reserves. Conservation Biology, 30, p.142-153.  Roberts, F., Guarino, C., Arias, M. 1994. The Impact of Industrial Waste on Venezuelan Marine Water. Water Science and Technology, 29, p. 51–60.  Suratman, S., Hussein, A.N.A.R., Latif, M.T., Weston, K.M., Piawai ,D., Kriteria, K., Air, M. 2014. Reassessment of Physico-Chemical Water Quality in Setiu Wetland, Malaysia. Sains Malaysiana, 43, p.1127-1131.  Cicin-Sain, B. and Belfiore, S. 2005. Linking marine protected areas to integrated coastal and ocean management: A review of theory and practice. Ocean and Coastal Management, 48, p. 847-868.** |
| **6** | **Clean water and  sanitation** | **6.A** | **By 2030, expand international cooperation and capacity-building  support to developing countries in water- and sanitation-related activities and programmes, including water harvesting, desalination, water efficiency, wastewater treatment, recycling and reuse technologies** |  |
| **6** | **Clean water and  sanitation** | **6.B** | **Support and strengthen the participation of local communities in  improving water and sanitation management** |  |
| **7** | **Affordable and clean  energy** | **7.01** | **By 2030, ensure universal access to affordable, reliable and modern  energy services** |  |
| **7** | **Affordable and clean  energy** | **7.02** | **By 2030, increase substantially the share of renewable energy in the  global energy mix** |  |
| **7** | **Affordable and clean  energy** | **7.03** | **By 2030, double the global rate of improvement in energy efficiency** |  |
| **7** | **Affordable and clean  energy** | **7.A** | **By 2030, enhance international cooperation to facilitate access to  clean energy research and technology, including renewable energy, energy efficiency and advanced and cleaner fossil-fuel technology, and promote investment in energy infrastructure and clean energy technology** |  |
| **7** | **Affordable and clean  energy** | **7.B** | **By 2030, expand infrastructure and upgrade technology for supplying  modern and sustainable energy services for all in developing countries, in particular least developed countries, small island developing States, and land-locked developing countries, in accordance with their respective programmes of support** | **Kyriazi, Z., Maes, F. and Degraer, S., 2016. Coexistence dilemmas in European marine spatial planning practices. The case of marine renewables and marine protected areas. Energy Policy, 97, pp.391-399.  Patel,. D., Nagababu, G., Radadia, N., Parsana, S., Sheth, M. and Sheth, N. 2018. GIS-based approach for the evaluation of offshore wind power potential for Gujarat. IOP Conference Series: Earth and Environmental Science, Volume 154, 2018 7th International Conference on Clean and Green Energy-ICCGE 2018 7–9 February 2018, Paris, France.  Ashley, M.C., Mangi, S.C., Rodwell, L.D. 2014.The potential of offshore windfarms to act as marine protected areas – A systematic review of current evidence. Marine Policy, 45, p. 301-309.  Maandal, G.L.D., Tamayao, M-A. M., Danao, L. 2019. An analysis of the technical feasibility of off-shore wind energy in the Philippines. Conference: ASME 2019 13th International Conference on Energy Sustainability collocated with the ASME 2019 Heat Transfer Summer Conference  Plummer, M.L. and Feist, B.E. 2016. Capturing Energy from the Motion of the Ocean in a Crowded Sea. Coastal Management, 44, p464-485.** |
| **8** | **Decent work and  economic growth** | **8.01** | **Sustain per capita economic growth in accordance with national  circumstances and, in particular, at least 7 per cent gross domestic product growth per annum in the least developed countries** | **Masud, M.M., Aldakhil, A.M., Nassani, A.A. and Azam, M.N., 2017. Community-based ecotourism management for sustainable development of marine protected areas in Malaysia. Ocean & Coastal Management, 136, pp.104-112.  Di Franco, A., Thiriet, P., Di Carlo, G., Dimitriadis, C., Francour, P., Gutiérrez, N.L., De Grissac, A.J., Koutsoubas, D., Milazzo, M., del Mar Otero, M. and Piante, C., 2016. Five key attributes can increase marine protected areas performance for small-scale fisheries management. Scientific reports, 6, p.38135.  Eriksson, B., Johansson, F. and Blicharska, M., 2019. Socio-economic impacts of marine conservation efforts in three Indonesian fishing communities. Marine Policy, 103, pp.59-67.  Wabnitz, C.C.C., Cisneros-Montemayor, A.M., Hanich, Q. and Ota, Y. 2018. Ecotourism, climate change and reef fish consumption in Palau: Benefits, trade-offs and adaptation strategies. Marine Policy, 88, p. 323-332.  Hargreaves-Allen, V.A., Mourato, S., Milner-Gulland, EJ. 2017. Drivers of coral reef marine protected area performance. PLoS ONE 12(6): e0179394.  Howson, P. 2020. Degrowth and the Blue Belt: Rethinking marine conservation in the British Overseas Territories. Ocean and Coastal Management, 196, 105290.** |
| **8** | **Decent work and  economic growth** | **8.02** | **Achieve higher levels of economic productivity through diversification, technological upgrading and innovation, including through a focus on high-value added and labour-intensive sectors** | **Russi, D., Pantzar, M., Kettunen, M., Gitti, G., Mutafoglu, K., Kotulak, M. and ten Brink, P., 2016. Socio-economic benefits of the EU marine protected areas. Institute for European Environmental Policy: London, UK.  Jaiteh, V., Lindfield, S.J., Mangubhai, S., Warren, C., Fitzpatrick, B. and Loneragan, N.R. 2016. Higher Abundance of Marine Predators and Changes in Fishers' Behavior Following Spatial Protection within the World's Biggest Shark Fishery. Frontiers in Marine Science, https://doi.org/10.3389/fmars.2016.00043.  Salayo, N. D., Perez, M.L., Garces, L.R., Pido, M.D. 2012. Mariculture development and livelihood diversification in the Philippines. Marine Policy, 36, p. 867-881.  Matera, J. 2016. Livelihood diversification and institutional (dis-)trust: Artisanal fishing communities under resource management programs in Providencia and Santa Catalina, Colombia. Marine Policy, 67, p 22-29.  Gasalla, M.A. and Gandini, F.C. 2016. The loss of fishing territories in coastal areas: the case of seabob-shrimp small-scale fisheries in São Paulo, Brazil. Maritime Studies, 15, (9).** |
| **8** | **Decent work and  economic growth** | **8.03** | **Promote development-oriented policies that support productive  activities, decent job creation, entrepreneurship, creativity and innovation, and encourage the formalization and growth of micro-, small- and medium-sized enterprises, including through access to financial services** |  |
| **8** | **Decent work and  economic growth** | **8.04** | **Improve progressively, through 2030, global resource efficiency in  consumption and production and endeavour to decouple economic growth from environmental degradation, in accordance with the 10-year framework of programmes on sustainable consumption and production, with developed countries taking the lead** | **Mesnildrey, L., Gascuel, D. and Le Pape, O., 2013. Integrating Marine Protected Areas in fisheries management systems: some criteria for ecological efficiency. Aquatic Living Resources, 26(2), pp.159-170.  Fernandez, P.R. 2007. Understanding Relational Politics in MPA Governance in Northeastern Iloilo, Philippines. Journal of Coastal Research, Special issue 50, p 38-42.  Rickels, W., Dovern, J., Quaas, M. 2016. Beyond fisheries: Common-pool resource problems in oceanic resources and services. Global Environmental Change, 40, p.37-49.  Ward, M., Possingham, H., Rhodes, J.R. and Mumby 2018. Food, money and lobsters: Valuing ecosystem services to align environmental management with Sustainable Development Goals. Ecosystem services, 29 p.56-69.  Ngoc, Q.T.K. 2018. Impacts on the ecosystem and human well-being of the marine protected area in Cu Lao Cham, Vietnam. Marine Policy, 90, p. 174-183.** |
| **8** | **Decent work and  economic growth** | **8.05** | **By 2030, achieve full and productive employment and decent work for  all women and men, including for young people and persons with disabilities, and equal pay for work of equal value** | **McCLANAHAN, T.I.M.O.T.H.Y., Davies, J. and Maina, J., 2005. Factors influencing resource users and managers' perceptions towards marine protected area management in Kenya. Environmental conservation, pp.42-49.  Chen, D., Garmulewicz, A., Merner, C., Elphinstone, C., Leggott, C. and Dewar, H., 2019. Encouraging youth engagement in marine protected areas: A survey of best practices in Canada. Aquatic Conservation: Marine and Freshwater Ecosystems, 29, pp.223-232.  Frocklin, s., Jiddawi, N.S., de la Torre-Castro, M. 2018. Small-scale innovations in coastal communities: shell-handicraft as a way to empower women and decrease poverty. Ecology and Society 23: 34.  Feruzia, S and Satria, A. 2016. Sustainable Coastal Resource Co-management. WIT Transactions on Ecology and the Environment, 201, p. 57-66.   Karras, C. and Agar, J.J. 2009. Cruzan fishers’ perspectives on the performance of the Buck Island Reef National Monument and the red hind seasonal closure. Ocean and Coastal Management, 52, p. 578-585.** |
| **8** | **Decent work and  economic growth** | **8.06** | **By 2020, substantially reduce the proportion of youth not in employment,  education or training** |  |
| **8** | **Decent work and  economic growth** | **8.07** | **Take immediate and effective measures to eradicate forced labour, end  modern slavery and human trafficking and secure the prohibition and elimination of the worst forms of child labour, including recruitment and use of child soldiers, and by 2025 end child labour in all its forms** |  |
| **8** | **Decent work and  economic growth** | **8.08** | **Protect labour rights and promote safe and secure working  environments for all workers, including migrant workers, in particular women migrants, and those in precarious employment** |  |
| **8** | **Decent work and  economic growth** | **8.09** | **By 2030, devise and implement policies to promote sustainable tourism  that creates jobs and promotes local culture and products** | **Masud, M.M., Aldakhil, A.M., Nassani, A.A. and Azam, M.N., 2017. Community-based ecotourism management for sustainable development of marine protected areas in Malaysia. Ocean & Coastal Management, 136, pp.104-112.  Pantzar, M., Russi, D., Hooper, T., Haines, R. 2017, Study on the economic benefits of Marine Protected Areas, European Commission, , Luxembourg, Publication Office of the EW  GARNIER, J., SILVA, I., DAVIDSON, J., HILL, N., MUAVES, L., Mucaves, S., Guissamulo, A. and Shaw, A., 2008. Co-management of the reef at Vamizi Island, northern Mozambique. COASTAL OCEANS RESEARCH AND DEVELOPMENT IN THE INDIAN OCEAN, p.121.  Depondt, F., Green, E. 2006. Diver user fees and the finsncial sustainability of marine protected areas: Opportunities and impediments. Ocean and coastal management, 49, p.188-202.  Dixon, J.A., Scura, L. and van't Hof, T., 1993. Meeting ecological and economic goals: marine parks in the Caribbean. AMBIO 22(2):117-125.** |
| **8** | **Decent work and  economic growth** | **8.1** | **Strengthen the capacity of domestic financial institutions to encourage  and expand access to banking, insurance and financial services for all** |  |
| **8** | **Decent work and  economic growth** | **8.A** | **Increase Aid for Trade support for developing countries, in particular  least developed countries, including through the Enhanced Integrated Framework for Trade-Related Technical Assistance to Least Developed Countries** |  |
| **8** | **Decent work and  economic growth** | **8.B** | **By 2020, develop and operationalize a global strategy for youth  employment and implement the Global Jobs Pact of the International Labour Organization** |  |
| **9** | **Industries, innovation  and infrastructure** | **9.01** | **Develop quality, reliable, sustainable and resilient infrastructure,  including regional and transborder infrastructure, to support economic development and human well-being, with a focus on affordable and equitable access for all** | **Cánovas-Molina, A. and García-Frapolli, E., 2020. Untangling worldwide conflicts in marine protected areas: Five lessons from the five continents. *Marine Policy*, p.104185.  Fauzi, A. and Buchary, E.A. 2010. A socioeconomic perspective of environmental degradation at Kepulauan Seribu Marine National Park, Indonesia. Coastal Management, 30, p. 167-181.  Weber de Morais, G., Schluter, A., Verweij, M. 2015. Can institutional change theories contribute to the understanding of marine protected areas? Global Environmental Change, 31, p. 154-162.  Brown, C.J., Althor, G., Halpern, B.S., Iftekhar, Md.S., Klein, C.J., Linke, S., Pryde, E.C., Schilizzi, S., Watson, J.E.M., Twohey, B., Possingham, H.P. 2017. Trade-offs in triple-bottom-line outcomes when recovering fisheries. Fish and Fisheries, 19, p.107-116.  Portman, M.E. 2007. Zoning design for cross-border marine protected areas: The Red Sea Marine Peace Park case study. Ocean and Coastal Management, 50, p.499-522.** |
| **9** | **Industries, innovation  and infrastructure** | **9.02** | **Promote inclusive and sustainable industrialization and, by 2030,  significantly raise industry’s share of employment and gross domestic product, in line with national circumstances, and double its share in least developed countries** |  |
| **9** | **Industries, innovation  and infrastructure** | **9.03** | **Increase the access of small-scale industrial and other enterprises, in  particular in developing countries, to financial services, including affordable credit, and their integration into value chains and markets** |  |
| **9** | **Industries, innovation  and infrastructure** | **9.04** | **By 2030, upgrade infrastructure and retrofit industries to make them  sustainable, with increased resource-use efficiency and greater adoption of clean and environmentally sound technologies and industrial processes, with all countries taking action in accordance with their respective capabilities** |  |
| **9** | **Industries, innovation  and infrastructure** | **9.05** | **Enhance scientific research, upgrade the technological capabilities of  industrial sectors in all countries, in particular developing countries, including, by 2030, encouraging innovation and substantially increasing the number of research and development workers per 1 million people and public and private research and development spending** | **Russi, D., Pantzar, M., Kettunen, M., Gitti, G., Mutafoglu, K., Kotulak, M. and ten Brink, P., 2016. Socio-economic benefits of the EU marine protected areas. *Institute for European Environmental Policy: London, UK*.  Christie, P. and White, A.T., 2007. Best practices for improved governance of coral reef marine protected areas. Coral Reefs, 26(4), pp.1047-1056.  Fulton, S., et al. 2019. Untapped Potential of Citizen Science in Mexican Small-Scale Fisheries. Frontiers in Marine Science, https://doi.org/10.3389/fmars.2019.00517  Ricciardi, F., Cantino, V., Rossignoli, C. 2017. Learning for the commons: organizational and evaluation challenges. 12th International Forum on Knowledge Asset Dynamics (IFKAD)  Hines, E.M., Strindberg, S., Junchumpoo, C., Ponnampalam, L.S., Ilangakoon, A.D., Jackson-Ricketts, J., Monanunsap, S. 2015. Line transect estimates of Irrawaddy dolphin abundance along the eastern Gulf Coast of Thailand. Frontiers in Marine Science, 2:63. doi: 10.3389/fmars.2015.00063** |
| **9** | **Industries, innovation  and infrastructure** | **9.A** | **Facilitate sustainable and resilient infrastructure development in  developing countries through enhanced financial, technological and technical support to African countries, least developed countries, landlocked developing countries and small island developing States 18** | **Hill, L.S., Johnson, J.A. and Adamowski, J., 2016. Meeting Aichi Target 11: Equity considerations in marine protected areas design. *Ocean & Coastal Management*, *134*, pp.112-119.  Cinner, JE 2009. Poverty and the use of destructive fishing gear near east African marine protected areas. Environmental Conservation, 36, p: 321-326  Habtemariam, B.T. and Fang, Q. 2016. Zoning for a multiple-use marine protected area using spatial multi-criteria analysis: The case of the Sheik Seid Marine National Park in Eritrea. Marine Policy, 63, p. 135-143.  Fox, H.E., Barnes, M.D., Ahmadia, G.N., Kao, G.,Glew, L., Haisfield, K., Hidayat, N.I., Huffard, C.L., Katz, L., Mangubhai, S., Purwanto. 2017. Generating actionable data for evidence-based conservation: The global center of marine biodiversity as a case study. Biological Conservation, 210, p. 299-309.  Dicken, M.L. 2013. Socio-economic aspects of the Sodwana Bay SCUBA diving industry, with a specific focus on sharks. African Journal of Marine Science, 36, p. 39-47.** |
| **9** | **Industries, innovation  and infrastructure** | **9.B** | **Support domestic technology development, research and innovation in  developing countries, including by ensuring a conducive policy environment for, inter alia, industrial diversification and value addition to commodities** |  |
| **9** | **Industries, innovation  and infrastructure** | **9.C** | **Significantly increase access to information and communications  technology and strive to provide universal and affordable access to the Internet in least developed countries by 2020** |  |
| **10** | **Reduced inequalities** | **10.01** | **By 2030, progressively achieve and sustain income growth of the  bottom 40 per cent of the population at a rate higher than the national average** | **Bennett, N.J., Calò, A., Di Franco, A., Niccolini, F., Marzo, D., Domina, I., Dimitriadis, C., Sobrado, F., Santoni, M.C., Charbonnel, E. and Trujillo, M., 2020. Social equity and marine protected areas: Perceptions of small-scale fishermen in the Mediterranean Sea.   Biological Conservation, 244, p.108531.  Khuu, D.T., Jones, P.J.S., Ekins, P. 2021. Governance analysis of Nha Trang Bay and Cu Lao Cham Marine Protected Areas, Vietnam. Marine Policy, 127, 104330.  Wahyudin, Y., Welly, M., Dos Santos, C., Pahlevi, M.R., Mahipal. 2019. The socio-economic survey on Atauro Island and Liquica Village, Timor Leste. IOP Conf. Ser.: Earth Environ. Sci. 241, 012004.  Pham-Do, K.H., Pham, T.T.T. 2020. Tourism in marine protected areas: A view from Nha Trang Bay, Vietnam. Tourism Managment Perspectives, 33, 100623.  Peterson, N.D. 2015. Unequal sustainabilities: The role of social inequalities in conservation and development projects. Economic Athropology, 2, p. 264-277.** |
| **10** | **Reduced inequalities** | **10.02** | **By 2030, empower and promote the social, economic and political  inclusion of all, irrespective of age, sex, disability, race, ethnicity, origin, religion or economic or other status** | **McCLANAHAN, T.I.M.O.T.H.Y., Davies, J. and Maina, J., 2005. Factors influencing resource users and managers' perceptions towards marine protected area management in Kenya. Environmental conservation, pp.42-49.  Cánovas-Molina, A. and García-Frapolli, E., 2020. Untangling worldwide conflicts in marine protected areas: Five lessons from the five continents. Marine Policy, p.104185.  von Helanda, F. and Clifton, J. 2015. Whose Threat Counts? Conservation Narratives in the Wakatobi National Park, Indonesia. Conservation and Society, 13, p. 154-165.  Ayers, C.A., Dearden, P., Rollins, R. 2012. An exploration of Hul’qumi’num Coast Salish peoples’ attitudes towards the establishment of no-take zones within marine protected areas in the Salish Sea, Canada. The Canadian Geographer, 56, p. 260-274.  Paredes, F., Flores, D., Figueroa, A., Gaymer, C.F., Aburto, J.A. 2019. Science, capacity building and conservation knowledge: The empowerment of the local community for marine conservation in Rapa Nui. Aquatic Conservation, 29, p. 130-137.** |
| **10** | **Reduced inequalities** | **10.03** | **Ensure equal opportunity and reduce inequalities of outcome, including  by eliminating discriminatory laws, policies and practices and promoting appropriate legislation, policies and action in this regard** | **Gustavsson, M., Lindström, L., Jiddawi, N.S. and De La Torre-Castro, M., 2014. Procedural and distributive justice in a community-based managed marine protected area in Zanzibar, Tanzania. *Marine Policy*, *46*, pp.91-100.  Cánovas-Molina, A. and García-Frapolli, E., 2020. Untangling worldwide conflicts in marine protected areas: Five lessons from the five continents. Marine Policy, p.104185.  Lucrezi, S., Esfehani, M.H., Ferretti, E. and Cerrano, C., 2019. The effects of stakeholder education and capacity building in marine protected areas: A case study from southern Mozambique. Marine Policy, 108, p.103645.  Thurlow, G., Jones, P.J.S. 2021. A governance analysis of Soufriere Marine Management Area, Saint Lucia: Previously effective but increasingly challenged by driving forces. Marine Policy, 127, 104220.  Beger, M., Harborne, A.R., Dacles, T.P., Solandt, J. and Ledesma, G.L. 2004. A Framework of Lessons Learned from Community-Based Marine Reserves and Its Effectiveness in Guiding a New Coastal Management Initiative in the Philippines. Environmental Management 34, p. 786-801.** |
| **10** | **Reduced inequalities** | **10.04** | **Adopt policies, especially fiscal, wage and social protection policies,  and progressively achieve greater equality** |  |
| **10** | **Reduced inequalities** | **10.05** | **Improve the regulation and monitoring of global financial markets and  institutions and strengthen the implementation of such regulations** |  |
| **10** | **Reduced inequalities** | **10.06** | **Ensure enhanced representation and voice for developing countries in  decision-making in global international economic and financial institutions in order to deliver more effective, credible, accountable and legitimate institutions** | **Lucrezi, S., Esfehani, M.H., Ferretti, E. and Cerrano, C., 2019. The effects of stakeholder education and capacity building in marine protected areas: A case study from southern Mozambique. Marine Policy, 108, p.103645.  De Santo, E.M., Jones, P.J. and Miller, A.M.M., 2011. Fortress conservation at sea: a commentary on the Chagos marine protected area. Marine Policy, 35(2), pp.258-260.  Chan, N. 2018. “Large Ocean States”: Sovereignty, Small Islands, and Marine Protected Areas in Global Oceans Governance. Global Governance: A Review of Multilateralism and International Organizations. https://doi.org/10.1163/19426720-02404005  Blasiak, R. Pittmn, J., Yagi, N and Sugino, H. 2016. Negotiating the Use of Biodiversity in Marine Areas beyond National Jurisdiction. Frontiers in Marine Science, 3:224. doi: 10.3389/fmars.2016.00224.   Freeman, E.R., Civera, C., Cortese, D. and Fiandrino, S. 2018. Strategising stakeholder empowerment for effective co-management within fishery-based commons. British Food Journal, 120, 11.** |
| **10** | **Reduced inequalities** | **10.07** | **Facilitate orderly, safe, regular and responsible migration and mobility of  people, including through the implementation of planned and well-managed migration policies** |  |
| **10** | **Reduced inequalities** | **10.A** | **Implement the principle of special and differential treatment for  developing countries, in particular least developed countries, in accordance with World Trade Organization agreements** | **~~Di Franco, A., Hogg, K.E., Calò, A., Bennett, N.J., Sévin-Allouet, M.A., Alaminos, O.E., Lang, M., Koutsoubas, D., Prvan, M., Santarossa, L. and Niccolini, F., 2020. Improving marine protected area governance through collaboration and co-production.~~ *~~Journal of Environmental Management~~*~~,~~ *~~269~~*~~, p.110757.  Christie, P., Bennett, N.J., Gray, N.J., Wilhelm, A., Lewis, N., Parks, J., Ban, N.C., Gruby, R.L., Gordon, L., Day, J., Taei, S., Friedlander, A.M. 2017. Why people matter in ocean governance: Incorporating human dimensions into large-scale marine protected areas. Marine Policy, 84, p. 273-284.  Mangubhai, S., Wilson, J.R., Rumetna, L., Maturbongs, Y. and Purwanto. 2015. Explicitly incorporating socioeconomic criteria and data into marine protected area zoning. Ocean and Coastal Management, 116, p.523-529.  Gaymer, C.F., Stadel, A. V., Ban, N.C., Carcamo, F., Irena, J., Liberknecht, L.M. 2014. Merging top-down and bottom-up approaches in marine protected areas planning: experiences from around the globe. Aquatic Conservation, 24, p. 128-144.  Adger, W.N., Brown, K.M., Tompkins, E. 2005. The Political Economy of Cross-Scale Networks in Resource Co-Management. Ecology and Society, 10, (2).~~** |
| **10** | **Reduced inequalities** | **10.B** | **Encourage official development assistance and financial flows, including  foreign direct investment, to States where the need is greatest, in particular least developed countries, African countries, small island developing States and landlocked developing countries, in accordance with their national plans and programmes** |  |
| **10** | **Reduced inequalities** | **10.C** | **By 2030, reduce to less than 3 per cent the transaction costs of migrant  remittances and eliminate remittance corridors with costs higher than 5 per cent** |  |
| **11** | **Sustainable cities and  communities** | **11.01** | **By 2030, ensure access for all to adequate, safe and affordable housing  and basic services and upgrade slums** | **Cánovas-Molina, A. and García-Frapolli, E., 2020. Untangling worldwide conflicts in marine protected areas: Five lessons from the five continents. *Marine Policy*, p.104185.  Cicin-Sain, B. and Belfiore, S., 2005. Linking marine protected areas to integrated coastal and ocean management: a review of theory and practice. Ocean & Coastal Management, 48(11-12), pp.847-868.  Potts, T., Burdon, D., Jackson, E., Atkins, J., Saunders, J., Hastings, E. and Langmead, O., 2014. Do marine protected areas deliver flows of ecosystem services to support human welfare?. Marine Policy, 44, pp.139-148.  Charles, A. and Wilson, L. 2009. Human dimensions of Marine Protected Areas. ICES Journal of Marine Science, 66, p. 6-15.  Hamid, S.K., Teniwut, W.A., Teniwut, R.M.K., Rahantoknam, M.A., Hasyim, C.L., Hungan, M. 2017. The Support of MPA (Marine Protected Area) in Coral Triangle Area: Evidence from Kei Islands, Indonesia. IOP Conf. Ser.: Earth Environ. Sci. 89, 012025.  Mascia, M.B. and Claus, C.A. 2009. A Property Rights Approach to Understanding Human Displacement from Protected Areas: the Case of Marine Protected Areas. Conservation Biology, 23, p. 16-23.** |
| **11** | **Sustainable cities and  communities** | **11.02** | **By 2030, provide access to safe, affordable, accessible and sustainable  transport systems for all, improving road safety, notably by expanding public transport, with special attention to the needs of those in vulnerable situations, women, children, persons with disabilities and older persons** |  |
| **11** | **Sustainable cities and  communities** | **11.03** | **By 2030, enhance inclusive and sustainable urbanization and capacity  for participatory, integrated and sustainable human settlement planning and management in all countries** |  |
| **11** | **Sustainable cities and  communities** | **11.04** | **Strengthen efforts to protect and safeguard the world’s cultural and  natural heritage** | **Rist, P., Rassip, W., Yunupingu, D., Wearne, J., Gould, J., Dulfer‐Hyams, M., Bock, E. and Smyth, D., 2019. Indigenous protected areas in Sea Country: Indigenous‐driven collaborative marine protected areas in Australia. *Aquatic Conservation: Marine and Freshwater Ecosystems*, *29*, pp.138-151.  Voyer, M., Gladstone, W and Goodall, H. 2013. Understanding marine park opposition: the relationship between social impacts, environmental knowledge and motivation to fish. Aquatic Conservation, 24, p.441-462.  Wang, L., Tian, M., Want, L. 2015. Geodiversity, geoconservation and geotourism in Hong Kong Global Geopark of China. Proceedings of the Geologists' Association, 126, p. 426-437.  Hassan, D. and Alam, A. 2019. Marine spatial planing and the Great Barrier Reef Marine Park Act 1975: An evaluation. Ocean and Coastal Management, 167, p. 188-196.  Gould, J., Smyth, D., Rassip, W., Rist, P., Oxenham, K. 2021. Recognizing the contribution of Indigenous Protected Areas to marine protected area management in Australia. Maritime Studies, 20, p.5-26.** |
| **11** | **Sustainable cities and  communities** | **11.05** | **By 2030, significantly reduce the number of deaths and the number of people affected and substantially decrease the direct economic losses relative to global gross domestic product caused by disasters, including water-related disasters, with a focus on protecting the poor and people in vulnerable situations** | **Potts, T., Burdon, D., Jackson, E., Atkins, J., Saunders, J., Hastings, E. and Langmead, O., 2014. Do marine protected areas deliver flows of ecosystem services to support human welfare?. Marine Policy, 44, pp.139-148.  Takasaki, Y. 2015. Learning from disaster: community-based marine protected areas in Fiji. Environment and development economics. 21, p.53-77  Mehedi Masud, M., Sackor, A.S., Ferdous Alam, A.S.A., Quasem Al-Amin, A., Abdul Ghani, A. B. 2018. Community responses to flood risk management – An empirical Investigation of the Marine Protected Areas (MPAs) in Malaysia. Marine Policy, 97, p.119-126.  Allison, G.W., Gaines, S.D., Lubchenco, J. and Possingham, H.P. 2003. Ensuring Persistence of Marine Reserves: Catastrophes Require Adopting an Insurance Factor. Ecological Applications, 13, p.S8-S24.  ~~Giampieri, M.A., DuBois, B., Allred, S., Bunting-Howarth K., Fisher, K., Moy, J., Sanderson, E.W. 2019. Visions of resilience: lessons from applying a digital democracy tool in New York’s Jamaica Bay watershed. Urban Ecosystems, 22, p.1-17.~~  Masud, M.M., Othman, A., Akhar, R., Rana, Md S. 2021. The underlying drivers of sustainable management of natural resources: The case of marine protected areas (MPAs). Ocean and Coastal Management, 199, 105405.** |
| **11** | **Sustainable cities and  communities** | **11.06** | **By 2030, reduce the adverse per capita environmental impact of cities,  including by paying special attention to air quality and municipal and other waste management** |  |
| **11** | **Sustainable cities and  communities** | **11.07** | **By 2030, provide universal access to safe, inclusive and accessible, green and public spaces, in particular for women and children, older persons and persons with disabilities** | **De Santo, E.M., Jones, P.J. and Miller, A.M.M., 2011. Fortress conservation at sea: a commentary on the Chagos marine protected area. Marine Policy, 35(2), pp.258-260.  Richmond, L. and Kotowicz, D., 2015. Equity and access in marine protected areas: The history and future of ‘traditional indigenous fishing’in the Marianas Trench Marine National Monument. Applied Geography, 59, pp.117-124.  Kleiber, D., Harris, L. and Vincent, A.C., 2018. Gender and marine protected areas: a case study of Danajon Bank, Philippines. Maritime Studies, 17(2), pp.163-175.  Retka, J., Jepson, P., Ladle, R.J., Malhado, A.C., Vieira, F.A., Normande, I.C., Souza, C.N., Bragagnolo, C. and Correia, R.A., 2019. Assessing cultural ecosystem services of a large marine protected area through social media photographs. Ocean & Coastal Management, 176, pp.40-48.  Hill, L.S., Johnson, J.A. and Adamowski, J., 2016. Meeting Aichi Target 11: Equity considerations in marine protected areas design. Ocean & Coastal Management, 134, pp.112-119.** |
| **11** | **Sustainable cities and  communities** | **11.A** | **Support positive economic, social and environmental links between  urban, peri-urban and rural areas by strengthening national and regional development planning** |  |
| **11** | **Sustainable cities and  communities** | **11.B** | **By 2020, substantially increase the number of cities and human  settlements adopting and implementing integrated policies and plans towards inclusion, resource efficiency, mitigation and adaptation to climate change, resilience to disasters, and develop and implement, in line with the Sendai Framework for Disaster Risk Reduction 2015-2030, holistic disaster risk management at all levels** | **Tittensor, D.P., Beger, M., Boerder, K., Boyce, D.G., Cavanagh, R.D., Cosandey-Godin, A., Crespo, G.O., Dunn, D.C., Ghiffary, W., Grant, S.M. and Hannah, L., 2019. Integrating climate adaptation and biodiversity conservation in the global ocean. *Science advances*, *5*(11), p.eaay9969.  Wilson, K.L., Tittensor, D.P., Worm, B. and Lotze, H.K., 2020. Incorporating climate change adaptation into marine protected area planning. Global Change Biology.  Tregarot, E., Catry, T., Pottier, A., El-Hacen, E, M., Cheikh, M.A.S., Cornet, C.C., Marechal, JP., Failer, P. 2021. Coastal protection assessment: a tradeoff between ecological, social, and economic issues. Ecosphere, 12, e03364.  Whitney, C.K., Frid, A., Edgar, B.K., Walkus, J., Siwallace, P., Siwallace, I.L., Ban, N.C. 2020. “Like the plains people losing the buffalo”: perceptions of climate change impacts, fisheries management, and adaptation actions by Indigenous peoples in coastal British Columbia, Canada. Ecology and Society 25(4):33.  Handayani, Sutrisno, A., Boedi, H. and Abdul, K. 2017. An Assessment of Social, Economic and Cultural Sustainability in the Management of Local Marine Conservation Area (KKLD) of Mayalibit Bay, Raja Ampat, West Papua, Indonesia. Advanced Science Letters, 23, p. 2410-2412.** |
| **11** | **Sustainable cities and  communities** | **11.C** | **Support least developed countries, including through financial and  technical assistance, in building sustainable and resilient buildings utilizing local materials** |  |
| **12** | **Responsible  consumption and production** | **12.01** | **Implement the 10-year framework of programmes on sustainable  consumption and production, all countries taking action, with developed countries taking the lead, taking into account the development and capabilities of developing countries** |  |
| **12** | **Responsible  consumption and production** | **12.02** | **By 2030, achieve the sustainable management and efficient use of natural resources** | **Kuempel, C.D., Jones, K.R., Watson, J.E. and Possingham, H.P., 2019. Quantifying biases in marine‐protected‐area placement relative to abatable threats. *Conservation Biology*, *33*(6), pp.1350-1359.  Zupan, M., Bulleri, F., Evans, J., Fraschetti, S., Guidetti, P., Garcia-Rubies, A., Sostres, M., Asnaghi, V., Caro, A., Deudero, S. and Goñi, R., 2018. How good is your marine protected area at curbing threats?. Biological Conservation, 221, pp.237-245.  Stobart, B., Warwick, R., González, C., Mallol, S., Díaz, D., Reñones, O. and Goñi, R., 2009. Long-term and spillover effects of a marine protected area on an exploited fish community. Marine ecology progress series, 384, pp.47-60.  Campbell, S.J., Edgar, G.J., Stuart‐Smith, R.D., Soler, G. and Bates, A.E., 2018. Fishing‐gear restrictions and biomass gains for coral reef fishes in marine protected areas. Conservation Biology, 32(2), pp.401-410.  Little, L.R., Grafton, R.Q., Kompas, T., Smith, A.D.M., Punt, A.E. and Mapstone, B.D., 2011. Complementarity of no‐take marine reserves and individual transferable catch quotas for managing the line fishery of the Great Barrier Reef. Conservation Biology, 25(2), pp.333-340.** |
| **12** | **Responsible  consumption and production** | **12.03** | **By 2030, halve per capita global food waste at the retail and consumer  levels and reduce food losses along production and supply chains, including post-harvest losses** |  |
| **12** | **Responsible  consumption and production** | **12.04** | **By 2020, achieve the environmentally sound management of chemicals and all wastes throughout their life cycle, in accordance with agreed international frameworks, and significantly reduce their release to air, water and soil in order to minimize their adverse impacts on human health and the environment** | **Abessa, D.M., Albuquerque, H.C., Morais, L.G., Araujo, G.S., Fonseca, T.G., Cruz, A.C., Campos, B.G., Camargo, J.B., Gusso-Choueri, P.K., Perina, F.C. and Choueri, R.B., 2018. Pollution status of marine protected areas worldwide and the consequent toxic effects are unknown. Environmental Pollution, 243, pp.1450-1459.  Lonsdale, J-A., Blake, S., Griffith, A. 2021. A novel systematic, risk based approach to support the designation of aquatic disposal sites. Marine Pollution Bulletin, 162, 111874.  Eid, E-M. E. and Fawzi, M.A. 1991. Egyptian approach towards appropriate use of coastal zones on the Red Sea. Marine Pollution Bulletin, 23, p.331-337.  Landrigan, P.J., Stegeman, J.J., Fleming, L.E., Allemand, D., Anderson, D.M., Backer, L.C., Brucker-Davis, F., Chevalier, N., Corra, L., Czerucka, D., Bottein, M.-Y.D., Demeneix, B., Depledge, M., Deheyn, D.D., Dorman, C.J., Fénichel, P., Fisher, S., Gaill, F., Galgani, F., Gaze, W.H., Giuliano, L., Grandjean, P., Hahn, M.E., Hamdoun, A., Hess, P., Judson, B., Laborde, A., McGlade, J., Mu, J., Mustapha, A., Neira, M., Noble, R.T., Pedrotti, M.L., Reddy, C., Rocklöv, J., Scharler, U.M., Shanmugam, H., Taghian, G., van de Water, J.A.J.M., Vezzulli, L., Weihe, P., Zeka, A., Raps, H. and Rampal, P., 2020. Human Health and Ocean Pollution. Annals of Global Health, 86, p.151.** |
| **12** | **Responsible  consumption and production** | **12.05** | **By 2030, substantially reduce waste generation through prevention,  reduction, recycling and reuse** |  |
| **12** | **Responsible  consumption and production** | **12.06** | **Encourage companies, especially large and transnational companies,  to adopt sustainable practices and to integrate sustainability information into their reporting cycle** |  |
| **12** | **Responsible  consumption and production** | **12.07** | **Promote public procurement practices that are sustainable, in  accordance with national policies and priorities** |  |
| **12** | **Responsible  consumption and production** | **12.08** | **By 2030, ensure that people everywhere have the relevant information and awareness for sustainable development and lifestyles in harmony with nature** | **Leisher, C., Mangubhai, S., Hess, S., Widodo, H., Soekirman, T., Tjoe, S., Wawiyai, S., Larsen, S.N., Rumetna, L., Halim, A. and Sanjayan, M., 2012. Measuring the benefits and costs of community education and outreach in marine protected areas. *Marine Policy*, *36*(5), pp.1005-1011.  Bennett, N.J. and Dearden, P., 2014. Why local people do not support conservation: Community perceptions of marine protected area livelihood impacts, governance and management in Thailand. Marine policy, 44, pp.107-116.   Jones, J.P.G., Andriahajanina, F.B., Ranambinintsoa, E.H., Hockley, N.J. and Ravoahangimalala, O. 2006. The economic importance of freshwater crayfish harvesting in Madagascar and the potential of community-based conservation to improve management. Oryx, 40, p.168-175.  Barr, B.W. 2013. Understanding and managing marine protected areas through integrating ecosystem based management within maritime cultural landscapes: Moving from theory to practice. Ocean and Coastal Management, 84, p.184-192  Murray, P.A., Crosby, M.P. and Daves, N. 2003. Promoting long-term sustainable use and conservation of marine resources in the eastern Caribbean - A regional collaborative project. Proc. Gulf Caribb. Fish. Instit. 54: 72 - 83** |
| **12** | **Responsible  consumption and production** | **12.A** | **Support developing countries to strengthen their scientific and  technological capacity to move towards more sustainable patterns of consumption and production** | **Retka, J., Jepson, P., Ladle, R.J., Malhado, A.C., Vieira, F.A., Normande, I.C., Souza, C.N., Bragagnolo, C. and Correia, R.A., 2019. Assessing cultural ecosystem services of a large marine protected area through social media photographs. Ocean & Coastal Management, 176, pp.40-48.  Russi, D., Pantzar, M., Kettunen, M., Gitti, G., Mutafoglu, K., Kotulak, M. and ten Brink, P., 2016. Socio-economic benefits of the EU marine protected areas. Institute for European Environmental Policy: London, UK.  Kamat, V.R. 2019. Dynamite Fishing in a Marine Protected Area in Tanzania: Why Youth Perceptions Matter. Coastal Management, 47, p.387-405.  Katikiro, R.E. 2016. Improving alternative livelihood interventions in marine protected areas: A case study in Tanzania. Marine Policy, 70, p.22-29.  Golden et al: 2019. Cohort Description of the Madagascar Health and Environmental Research–Antongil (MAHERY–Antongil) Study in Madagascar. Frontiers in Nutrition https://doi.org/10.3389/fnut.2019.00109** |
| **12** | **Responsible  consumption and production** | **12.B** | **Develop and implement tools to monitor sustainable development impacts for sustainable tourism that creates jobs and promotes local culture and products** | **Crabbe, M.J.C., Martinez, E., Garcia, C., Chub, J., Castro, L. and Guy, J., 2009. Is capacity building important in policy development for sustainability? A case study using action plans for sustainable Marine Protected Areas in Belize. *Society and Natural Resources*, *23*(2), pp.181-190.  Hadwen, W.L., Hill, W. and Pickering, C.M., 2008. Linking visitor impact research to visitor impact monitoring in protected areas. JournaL of ecoTourism, 7(1), pp.87-93.  Dinica, V., 2018. The environmental sustainability of protected area tourism: towards a concession-related theory of regulation. Journal of Sustainable Tourism, 26(1), pp.146-164.  Scheske, C., Rodriguez, M.A., Buttazzoni, J.B., Strong-Cvetich, N., Gelcich, S., Monteferri, B., Rodriguez, L.F., Ruiz, M. 2019. Surfing and marine conservation: Exploring surf-break protection as IUCN protected area categories and other effective area-based conservation measures. Aquatic Conservation, 29, p. 195-211.  Murray, P.A., Crosby, M.P. and Daves, N. 2003. Promoting long-term sustainable use and conservation of marine resources in the eastern Caribbean - A regional collaborative project. Proc. Gulf Caribb. Fish. Instit. 54: 72 - 83** |
| **12** | **Responsible  consumption and production** | **12.C** | **Rationalize inefficient fossil-fuel subsidies that encourage wasteful  consumption by removing market distortions, in accordance with national circumstances, including by restructuring taxation and phasing out those harmful subsidies, where they exist, to reflect their environmental impacts, taking fully into account the specific needs and conditions of developing countries and minimizing the possible adverse impacts on their development in a manner that protects the poor and the affected communities** |  |
| **13** | **Climate action** | **13.01** | **Strengthen resilience and adaptive capacity to climate-related hazards and natural disasters in all countries** | **Micheli, F., Saenz-Arroyo, A., Gre+G5enley, A., Vazquez, L., Montes, J.A.E., Rossetto, M. and De Leo, G.A., 2012. Evidence that marine reserves enhance resilience to climatic impacts. PloS one, 7(7), p.e40832.  Bates, A.E., Cooke, R.S., Duncan, M.I., Edgar, G.J., Bruno, J.F., Benedetti-Cecchi, L., Côté, I.M., Lefcheck, J.S., Costello, M.J., Barrett, N. and Bird, T.J., 2019. Climate resilience in marine protected areas and the ‘Protection Paradox’. Biological Conservation, 236, pp.305-314.  Takasaki, Y. 2015. Learning from disaster: community-based marine protected areas in Fiji. Environment and development economics. 21, p.53-77  Brunce, M., Brown, K. and Rosendo, S. 2010. Policy misfits, climate change and cross-scale vulnerability in coastal Africa: how development projects undermine resilience. Environmental Science and Policy, 13, p.485-497.  Weeks, R. and Jupiter, S.D. 2013. Adaptive Comanagement of a Marine Protected Area Network in Fiji. Conservation Biology, 27, p.1234-1244.** |
| **13** | **Climate action** | **13.02** | **Integrate climate change measures into national policies, strategies and  planning** |  |
| **13** | **Climate action** | **13.03** | **Improve education, awareness-raising and human and institutional capacity on climate change mitigation, adaptation, impact reduction and early warning** | **Cvitanovic, C., Marshall, N.A., Wilson, S.K., Dobbs, K. and Hobday, A.J., 2014. Perceptions of Australian marine protected area managers regarding the role, importance, and achievability of adaptation for managing the risks of climate change. *Ecology and Society*, *19*(4).  Mcleod, E., Anthony, K.R., Mumby, P.J., Maynard, J., Beeden, R., Graham, N.A., Heron, S.F., Hoegh-Guldberg, O., Jupiter, S., MacGowan, P. and Mangubhai, S., 2019. The future of resilience-based management in coral reef ecosystems. Journal of environmental management, 233, pp.291-301.  Chuang, C-T, Chen, J-Y., Chang, K-C., Hung, L-W. and Liu, T-K. 2013. CRITICAL SUCCESS FACTORS ANALYSIS OF IMPLEMENTING MPA AT THE YILAN GUEISHAN ISLAND, TAIWAN. Journal of Marine Science and Technology, 21, p. 423-429.  Takasaki, Y. 2015. Learning from disaster: community-based marine protected areas in Fiji. Environment and development economics. 21, p.53-77  van Oppen et al. 2017. Shifting paradigms in restoration of the world's coral reefs. Global Change Biology, 23, p.3437-3448.** |
| **13** | **Climate action** | **13.A** | **Implement the commitment undertaken by developed-country parties to  the United Nations Framework Convention on Climate Change to a goal of mobilizing jointly $100 billion annually by 2020 from all sources to address the needs of developing countries in the context of meaningful mitigation actions and transparency on implementation and fully operationalize the Green Climate Fund through its capitalization as soon as possible** |  |
| **13** | **Climate action** | **13.B** | **Promote mechanisms for raising capacity for effective climate  change-related planning and management in least developed countries and small island developing States, including focusing on women, youth and local and marginalized communities** |  |
| **14** | **Life below water** | **14.01** | **By 2025, prevent and significantly reduce marine pollution of all kinds, in particular from land-based activities, including marine debris and nutrient pollution** | **Cánovas-Molina, A. and García-Frapolli, E., 2020. Untangling worldwide conflicts in marine protected areas: Five lessons from the five continents. *Marine Policy*, p.104185.  Davies, T.W., Duffy, J.P., Bennie, J. and Gaston, K.J., 2016. Stemming the tide of light pollution encroaching into marine protected areas. Conservation Letters, 9(3), pp.164-171.  Liubartseva, S., Coppini, G. and Lecci, R., 2019. Are mediterranean marine protected areas sheltered from plastic pollution?. Marine pollution bulletin, 140, pp.579-587.  Fauzi, A. and Buchary, E.A. 2010. A socioeconomic perspective of environmental degradation at Kepulauan Seribu Marine National Park, Indonesia. Coastal Management, 30, p. 167-181.  Barletta, M., Lima, A.R.A., Costa, M.F. 2019. Distribution, sources and consequences of nutrients, persistent organic pollutants, metals and microplastics in South American estuaries. Science of the Total Environment, 651, p. 1199-1218.** |
| **14** | **Life below water** | **14.02** | **By 2020, sustainably manage and protect marine and coastal  ecosystems to avoid significant adverse impacts, including by strengthening their resilience, and take action for their restoration in order to achieve healthy and productive oceans** | **N.S. Barrett, G.J. Edgar, C.D. Buxton, M. Haddon Changes in fish assemblages following 10 years of protection in Tasmanian marine protected areas J. Exp. Mar. Biol. Ecol., 345 (2007), pp. 141-157, 10.1016/j.jembe.2007.02.007  Harmelin-Vivien, M., Cottalorda, J.M., Dominici, J.M., Harmelin, J.G., Le Diréach, L. and Ruitton, S., 2015. Effects of reserve protection level on the vulnerable fish species Sciaena umbra and implications for fishing management and policy. Global Ecology and Conservation, 3, pp.279-287.  Villamor, A. and Becerro, M.A., 2012. Species, trophic, and functional diversity in marine protected and non-protected areas. Journal of Sea Research, 73, pp.109-116.  Bruno, J.F., Côté, I.M. and Toth, L.T., 2019. Climate change, coral loss, and the curious case of the parrotfish paradigm: Why don't marine protected areas improve reef resilience?. Annual review of marine science, 11, pp.307-334.  Bates, A.E., Cooke, R.S., Duncan, M.I., Edgar, G.J., Bruno, J.F., Benedetti-Cecchi, L., Côté, I.M., Lefcheck, J.S., Costello, M.J., Barrett, N. and Bird, T.J., 2019. Climate resilience in marine protected areas and the ‘Protection Paradox’. Biological Conservation, 236, pp.305-314.** |
| **14** | **Life below water** | **14.03** | **Minimize and address the impacts of ocean acidification, including  through enhanced scientific cooperation at all levels** |  |
| **14** | **Life below water** | **14.04** | **By 2020, effectively regulate harvesting and end overfishing, illegal, unreported and unregulated fishing and destructive fishing practices and implement science-based management plans, in order to restore fish stocks in the shortest time feasible, at least to levels that can produce maximum sustainable yield as determined by their biological characteristics** | **Cánovas-Molina, A. and García-Frapolli, E., 2020. Untangling worldwide conflicts in marine protected areas: Five lessons from the five continents. *Marine Policy*, p.104185.  Roberts, C. M., Branch, G., Bustamante, R. H., Castilla, J. C., Dugan, J., Halpern, B. S., et al. (2003). Application of ecological criteria in selecting marine reserves and developing reserve networks. Ecol. Appl. 13, S215–S228. doi: 10.1890/1051-0761(2003)013[0215:AOECIS]2.0.CO;2  Muallil, R.N., Deocadez, M.R., Martinez, R.J.S., Campos, W.L., Mamauag, S.S., Nañola Jr, C.L. and Aliño, P.M., 2019. Effectiveness of small locally-managed marine protected areas for coral reef fisheries management in the Philippines. Ocean & Coastal Management, 179, p.104831.  Christie, M.R., Tissot, B.N., Albins, M.A., Beets, J.P., Jia, Y., Ortiz, D.M., Thompson, S.E. and Hixon, M.A., 2010. Larval connectivity in an effective network of marine protected areas. PloS one, 5(12), p.e15715.  Stewart, B., Howarth, L.M., Wood, H., Whiteside, K., Carney, W., Crimmins, E., O'Leary, B. C., Hawkins, J.P., and Roberts, C.M. 2020. Marine conservation begins at home: how a local community and protection of a small bay sent waves of change around the UK and beyond. Frontiers in Marine Science.** |
| **14** | **Life below water** | **14.05** | **By 2020, conserve at least 10 per cent of coastal and marine areas, consistent with national and international law and based on the best available scientific information** | **Devillers, R., Pressey, R.L., Ward, T.J., Grech, A., Kittinger, J.N., Edgar, G.J. and Watson, R.A., 2020. Residual marine protected areas five years on: Are we still favouring ease of establishment over need for protection?. Aquatic Conservation: Marine and Freshwater Ecosystems, 30(9), pp.1758-1764.  Rees, S., Pittman, S.J., Foster, N., Langmead, O., Griffiths, C., Fletcher, S., Johnson, D.E., Attrill, M. 2018. Bridging the divide: Social–ecological coherence in Marine Protected Area network design. Aquatic Conservation, 28, 754-763.  Magris, R.A., Millis, M., Fuentes, M.M.P.B., Pressey, R.L. 2013. Analysis of progree towards a comprehensive system of marine protected areas in Brazil. Natureza & Conservação 11, p. 81-87.  Alvarado, J.J., Cortes, J., Fernanda Esquivel, M., Salas, E. 2012. Costa Rica's Marine Protected Areas: status and perspectives. 60, 129-142.  Ison, S., Hills, J., Morris, C., Stead, S.M. 2018. Sustainable financing of a national Marine Protected Area network in Fiji. Ocean and Coastal Management, 163, p.352-363.  Campbell, L.M. and Gray, N.J. 2019. Area expansion versus effective and equitable management in international marine protected areas goals and targets. Marine Policy, 100, p. 192-199.** |
| **14** | **Life below water** | **14.06** | **By 2020, prohibit certain forms of fisheries subsidies which contribute  to overcapacity and overfishing, eliminate subsidies that contribute to illegal, unreported and unregulated fishing and refrain from introducing new such subsidies, recognizing that appropriate and effective special and differential treatment for developing and least developed countries should be an integral part of the World Trade Organization fisheries subsidies negotiation** |  |
| **14** | **Life below water** | **14.07** | **By 2030, increase the economic benefits to Small Island developing States and least developed countries from the sustainable use of marine resources, including through sustainable management of fisheries, aquaculture and tourism** | **Hill, L.S., Johnson, J.A. and Adamowski, J., 2016. Meeting Aichi Target 11: Equity considerations in marine protected areas design. Ocean & Coastal Management, 134, pp.112-119.  Jumeau, R., 2013, April. Small island developing states, large ocean states. In Expert Group Meeting on Oceans, Seas and Sustainable Development: Implementation and follow-up to Rio (Vol. 20).  Teelucksingh, S., Nunes, P.A. and Perrings, C., 2013. Biodiversity-based development in small island developing states. Environment and development economics, 18(4), pp.381-391.  Marinesque, S., Kaplan, D.M. and Rodwell, L.D., 2012. Global implementation of marine protected areas: is the developing world being left behind?. Marine Policy, 36(3), pp.727-737.  Hogg, K., Semitiel-Garcia, M., Noguera-Mendez, P., Gray, T. and Young, S. 2017. Perceptions of Threats Facing Cabo de Palos - Islas Hormigas MPA and Potential Solutions. Coastal Management, 46, p.58-74.** |
| **14** | **Life below water** | **14.A** | **Increase scientific knowledge, develop research capacity and transfer  marine technology, taking into account the Intergovernmental Oceanographic Commission Criteria and Guidelines on the Transfer of Marine Technology, in order to improve ocean health and to enhance the contribution of marine biodiversity to the development of developing countries, in particular small island developing States and least developed countries** |  |
| **14** | **Life below water** | **14.B** | **Provide access for small-scale artisanal fishers to marine resources and markets** | **Said, A., MacMillan, D., Schembri, M. and Tzanopoulos, J., 2017. Fishing in a congested sea: What do marine protected areas imply for the future of the Maltese artisanal fleet?. Applied Geography, 87, pp.245-255.  Madrigal-Ballestero, R., Albers, H.J., Capitán, T. and Salas, A., 2017. Marine protected areas in Costa Rica: How do artisanal fishers respond?. Ambio, 46(7), pp.787-796.  D'agata, S., Darling, E.S., Gurney, G.G., McClanhan, T.R., Muthiga, N.A., Rabearisoa, A., Maina, J.M. 2020. Multiscale determinants of social adaptive capacity in small-scale fishing communities. Environmental Science and Policy, 108, 56-66.  Pennino, M.G., Rufener, MC., Thome-Souza, M.J.F., Carvalho, A.R., Lopez, P.F.M. and Sumaila, U.R. 2018. Searching for a compromise between biological and economic demands to protect vulnerable habitats. Scientific Reports, 8, 7791.  Frocklin, s., Jiddawi, N.S., de la Torre-Castro, M. 2018. Small-scale innovations in coastal communities: shell-handicraft as a way to empower women and decrease poverty. Ecology and Society 23: 34.** |
| **14** | **Life below water** | **14.C** | **Enhance the conservation and sustainable use of oceans and their  resources by implementing international law as reflected in UNCLOS, which provides the legal framework for the conservation and sustainable use of oceans and their resources, as recalled in paragraph 158 of The Future We Want** |  |
| **15** | **Life on land** | **15.01** | **By 2020, ensure the conservation, restoration and sustainable use of  terrestrial and inland freshwater ecosystems and their services, in particular forests, wetlands, mountains and drylands, in line with obligations under international agreements** |  |
| **15** | **Life on land** | **15.02** | **By 2020, promote the implementation of sustainable management of all  types of forests, halt deforestation, restore degraded forests and substantially increase afforestation and reforestation globally** |  |
| **15** | **Life on land** | **15.03** | **By 2030, combat desertification, restore degraded land and soil,  including land affected by desertification, drought and floods, and strive to achieve a land degradation-neutral world** |  |
| **15** | **Life on land** | **15.04** | **By 2030, ensure the conservation of mountain ecosystems, including  their biodiversity, in order to enhance their capacity to provide benefits that are essential for sustainable development** |  |
| **15** | **Life on land** | **15.05** | **Take urgent and significant action to reduce the degradation of natural habitats, halt the loss of biodiversity and, by 2020, protect and prevent the extinction of threatened species** | **Menéndez, P., Losada, I.J., Torres-Ortega, S., Narayan, S. and Beck, M.W., 2020. The global flood protection benefits of mangroves. Scientific Reports, 10(1), pp.1-11.  Halpern, B.S., Selkoe, K.A., White, K.A., Albert, S., Aswani, S. and Lauer, M. 2012. Marine protected areas and resilience to sedimentation in the Solomon Islands. Coral Reefs, 32, p: 61-69  Hamilton, R.J., Hughes, A., Brown, C.J., Leve, T., Kama, W. 2019. Community-based management fails to halt declines of bumphead parrotfish and humphead wrasse in Roviana Lagoon, Solomon Islands. Coral Reefs, 38, 455-465.  Mouillot, D., Velez, L., Maire, E., Masson, A., Hicks, C.C., Moloney, J., Troussellier, M. 2020. Global correlates of terrestrial and marine coverage by protected areas on islands. nature communications, 11, 4438.  Ramirez-Ortiz, G., Reyes-Bonilla, H., Balart, E.F., Olivier, D., Huato-Soberanis, L., Micheli, F., Edgar, G.J. 2020. Reduced fish diversity despite increased fish biomass in a Gulf of California Marine Protected Area. PeerJ 8:e8885 https://doi.org/10.7717/peerj.8885** |
| **15** | **Life on land** | **15.06** | **Promote fair and equitable sharing of the benefits arising from the  utilization of genetic resources and promote appropriate access to such resources, as internationally agreed** |  |
| **15** | **Life on land** | **15.07** | **Take urgent action to end poaching and trafficking of protected species  of flora and fauna and address both demand and supply of illegal wildlife products** | **Teh, L.C.L., Teh, L.S.L and Chung, F.C. 2007. A private management approach to coral reef conservation in Sabah, Malaysia. Biodiversity and Conservation, 17, p. 3061-3077.  Weekers, D.P. and Zahnow, R. 2018. Risky facilities: Analysis of illegal recreational fishing in the Great Barrier Reef Marine Park, Australia. Journal of Criminology, 52, p. 315-333.  Thiault, L., Weekers, D., Curnock, M., Marshall, N., Pert, P.L., Beeden, R., Dyer, M., Claudet, J. 2020. Predicting poaching risk in marine protected areas for improved patrol efficiency. Journal of Environmental Management, 254, 109808.** |
| **15** | **Life on land** | **15.08** | **By 2020, introduce measures to prevent the introduction and  significantly reduce the impact of invasive alien species on land and water ecosystems and control or eradicate the priority species** | **Kellner, J.B. and Hastings, A. 2009. A reserve paradox: introduced heterogeneity may increase regional invasibility. Conservation Letters, 2, p. 115-122.  Mannino, A.m., Parasporo, M., Crocetta, F. and Balistreri, P. 2016. An updated overview of the marine alien and cryptogenic species from the Egadi Islands Marine Protected Area (Italy). Marine Biodiversity, 47, p. 469-480.** |
| **15** | **Life on land** | **15.09** | **By 2020, integrate ecosystem and biodiversity values into national and  local planning, development processes, poverty reduction strategies and accounts** | **Bergseth, B.J., Gurney, G.G., Barnes, M.L., Arias, A., Cinner, J.E. 2018. Addressing poaching in marine protected areas through voluntary surveillance and enforcement. Nature Sustainability, 1, p. 421-426.  Vasquez-Lavin, F., Simon, J.W., Paz-Lerdon, X. 2013. Determining the Feasibility of Establishing New Multiple-Use Marine Protected Areas in Chile. AMBIO, 42, p. 997-1009.  Zhao, Q., Stephenson, F., Lundquist, C., Kaschner, K., Jayathilake, D., Costello, M.J. 2020. Where Marine Protected Areas would best represent 30% of ocean biodiversity. Biological Conservation, 224, 108536.** |
| **15** | **Life on land** | **15.A** | **Mobilize and significantly increase financial resources from all sources  to conserve and sustainably use biodiversity and ecosystems** | **Bohorquez, J.J., Dvarskas, A. and Pikitch, E.K. 2019. Filling the Data Gap – A Pressing Need for Advancing MPA Sustainable Finance. Frontiers in Marine Science, 6:45. doi: 10.3389/fmars.2019.00045.  Dharmaratne, G.S., Sant, F.Y., Walling, L.J. 2000. Tourism potentials for financing protected areas. Annals of Tourism Research, 27, p. 590-610.  Mallin, M-A. F., Stolz, D.C., Thompson, B.S., Berbesgaard, M. 2019. In oceans we trust: Conservation, philanthropy, and the political economy of the Phoenix Islands Protected Area. Marine Policy, 107, 103421.  Thiele, T. and Gerber, L.R. 2017. Innovative financing for the High Seas. Aquatic Conservation, 27, p.89-99.** |
| **15** | **Life on land** | **15.B** | **Mobilize significant resources from all sources and at all levels to  finance sustainable forest management and provide adequate incentives to developing countries to advance such management, including for conservation and reforestation** |  |
| **15** | **Life on land** | **15.C** | **Enhance global support for efforts to combat poaching and trafficking of  protected species, including by increasing the capacity of local communities to pursue sustainable livelihood opportunities** | **Jennings, S., Marshall, S.S., Polunin, N.V.C. 1996. Seychelles' marine protected areas: Comparative structure and status of reef fish communities. Biological Conservation, 75, p. 201-209.  Attwood, C.G., Mann, B.Q., Beaumont, J. and Harris, J.M. 2010. Review of the state of marine protected areas in South Africa. South African Journal of Marine Science, 18, p. 341-367.** |
| **16** | **Peace, Justic and  strong institutions** | **16.01** | **Significantly reduce all forms of violence and related death rates  everywhere** |  |
| **16** | **Peace, Justic and  strong institutions** | **16.02** | **End abuse, exploitation, trafficking and all forms of violence against and  torture of children** |  |
| **16** | **Peace, Justic and  strong institutions** | **16.03** | **Promote the rule of law at the national and international levels and  ensure equal access to justice for all** |  |
| **16** | **Peace, Justic and  strong institutions** | **16.04** | **By 2030, significantly reduce illicit financial and arms flows, strengthen  the recovery and return of stolen assets and combat all forms of organized crime** |  |
| **16** | **Peace, Justic and  strong institutions** | **16.05** | **Substantially reduce corruption and bribery in all their forms** | **Robles-Zavala, E. 2014. Coastal livelihoods, poverty and well-being in Mexico. A case study of institutional and social constraints. Journal of Coastal Conservation, 18, p.431-448.  Thomas, S. 2016. Between Tun Mustapha and the deep blue sea: the political ecology of blue carbon in Sabah. Environmental Science and Policy, 55, p. 20-35.** |
| **16** | **Peace, Justic and  strong institutions** | **16.06** | **Develop effective, accountable and transparent institutions at all levels** | **McClanahan, T.R. and Abunge, C.A. 2015. Perceptions of fishing access restrictions and the disparity of benefits among stakeholder communities and nations of south-eastern Africa. Fish and Fisheries, 17, p. 417-437.  Atmodjo, E., Lamers, M., and Mol, A. 2017. Financing marine conservation tourism: Governing entrance fees in Raja Ampat, Indonesia. Marine Policy, 78, p. 181-188.  Catlin, J., Jones, T. and Jones, R. 2010. Balancing commercial and environmental needs: licensing as a means of managing whale shark tourism on Ningaloo reef. Journal of Sustainable Tourism, 20, p. 163-178.  Doulman, D.J. 2007. Coping with the extended vulnerability of marine ecosystems: implementing the 1995 FAO Code of Conduct for Responsible Fisheries. Social Science Infromation, 46, p. 189-237.  Yates, K.L, and Shoeman, D.S. 2014. Incorporating the spatial access priorities of fishers into strategic conservation planning and marine protected area design: reducing cost and increasing transparency. ICES Journal of Marine Science, 72, p. 587-594.** |
| **16** | **Peace, Justic and  strong institutions** | **16.07** | **Ensure responsive, inclusive, participatory and representative  decision-making at all levels** | **Di Franco, A., Hogg, K.E., Calò, A., Bennett, N.J., Sévin-Allouet, M.A., Alaminos, O.E., Lang, M., Koutsoubas, D., Prvan, M., Santarossa, L. and Niccolini, F., 2020. Improving marine protected area governance through collaboration and co-production. Journal of Environmental Management, 269, p.110757.  Gurney, G.G., Pressey, R.L., Cinner, J.E., Pollnac, R. and Campbell, S.J., 2015. Integrated conservation and development: evaluating a community-based marine protected area project for equality of socioeconomic impacts. Philosophical Transactions of the Royal Society B: Biological Sciences, 370(1681), p.20140277.  Gerhardinger, L. C., Godoy, G. P., Jones, J. S., Sales, G and Ferreira, B. P., 2011. Marine Protected Dramas: The Flaws of the Brazilian National System of Marine Protected Areas. Environmental Management, p.630 - 643.  Bernards, O. and Hempel, G., 2013. Case studies of changes in the structure of reef lagoon fisheries off southern Kenya. ECOTROPICA 19, p.59-72.  Andriamalala G. and Gardner, C. 2010. Using the dina tool as governance of natural resources: lessons of Velondriake, southwestern Madagascar. Tropical Conservation Science, 3. p. 447-472.  Rodriguez-Martinez, R.E., 2008. Community involvement in marine protected areas: The case of Puerto Morelos reef, México. Journal of Environmental Management, 88, p. 1151-1160.** |
| **16** | **Peace, Justic and  strong institutions** | **16.08** | **Broaden and strengthen the participation of developing countries in the  institutions of global governance** | **Duda, A.M. 2016. Strengthening global governance of Large Marine Ecosystems by incorporating coastal management and Marine Protected Areas. Environmental Development, 17, p. 249-263.  Laffoley, D., Baxter, J.M., Amon, D.j., Currie, D.E.J., Downs, C.A., Hall-Spencer, J.M., Harden-Davies, H., Page, R., Reid, C.P., Roberts, C.M., Rogers, A., Thiele, T., Sheppard, C.R.C., Sumaila, R.U., Woodall, L.C. 2019. Eight urgent, fundamental and simultaneous steps needed to restore ocean health, and the consequences for humanity and the planet of inaction or delay. Aquatic Conservation, 30, p.194-208.  Mullon, C., Guillotreau, P., Galbraith, E.D., Fortilus, J., Chaboud, C., Bopp, L., Aumont, O., Laplam, D. 2017. Exploring future scenarios for the global supply chain of tuna. Deep Sea Research Part II: Tropical Studies in Oceanography, 14-, p. 251-267.  James, M and Crabbe, C. 2019. Adapting to extreme environments: can coral reefs adapt to climate change? Emerging Topics in Life Sciences, 3, p.183-195.** |
| **16** | **Peace, Justic and  strong institutions** | **16.09** | **By 2030, provide legal identity for all, including birth registration** |  |
| **16** | **Peace, Justic and  strong institutions** | **16.1** | **Ensure public access to information and protect fundamental freedoms,  in accordance with national legislation and international agreements** |  |
| **16** | **Peace, Justic and  strong institutions** | **16.A** | **Strengthen relevant national institutions, including through international  cooperation, for building capacity at all levels, in particular in developing countries, to prevent violence and combat terrorism and crime** |  |
| **16** | **Peace, Justic and  strong institutions** | **16.B** | **Promote and enforce non-discriminatory laws and policies for  sustainable development** |  |
|  | **Partnerships for the  goals** | **17.01** | **Strengthen domestic resource mobilization, including through  international support to developing countries, to improve domestic capacity for tax and other revenue collection** |  |
| **17** | **Partnerships for the  goals** | **17.02** | **Developed countries to implement fully their official development  assistance commitments, including the commitment by many developed countries to achieve the target of 0.7 per cent of ODA/GNI to developing countries and 0.15 to 0.20 per cent of ODA/GNI to least developed countries ODA providers are encouraged to consider setting a target to provide at least 0.20 per cent of ODA/GNI to least developed countries** |  |
| **17** | **Partnerships for the  goals** | **17.03** | **Mobilize additional financial resources for developing countries from  multiple sources** |  |
| **17** | **Partnerships for the  goals** | **17.04** | **Assist developing countries in attaining long-term debt sustainability  through coordinated policies aimed at fostering debt financing, debt relief and debt restructuring, as appropriate, and address the external debt of highly indebted poor countries to reduce debt distress** | **McGowan, J., Weary, R., Carriere, L., Game, E.T., Smith, J.L., Garvey, M. and Possingham, H.P., 2020. Prioritizing debt conversion opportunities for marine conservation. Conservation Biology, 34(5), pp.1065-1075.  Techera, E.J. 2019. Protected Area Law in Seychelles: Legal Complexity in a Micro-jurisdiction. The International Journal of Marine and Coastal Law, https://doi.org/10.1163/15718085-23342030  Maypa, A.P., White, A.T., Canares, E., Martinez, R., Eisma-Osorio, R.L. Alino, P., and Apistar, D. 2012. Marine Protected Area Management Effectiveness: Progress and Lessons in the Philippines. Coastal Management, 40. p.510-524.  Said, A. and MacMillan, D. 2020. ‘Re-grabbing’ marine resources: a blue degrowth agenda for the resurgence of small-scale fisheries in Malta. Sustainability Science, 15, p. 91-102.  Butardo Toribio, M. Z., Alino, P.M., Guiang, E.S. 2009. Cost-Benefit Study of Marine Protected Areas: Implications on Financing and Institutional Needs. Philippine Agriculatura Scientist, 92, p.153-169.  Clifton, J. 2013. Compensation, conservation and communities: an analysis of direct payments initiatives within an Indonesian marine protected area. Environmental Conservation, 40, p. 287-295.  Silver, J.J. and Campbell, L.M., 2018. Conservation, development and the blue frontier: The Republic of Seychelles’ debt restructuring for marine conservation and climate adaptation program. International Social Science Journal, 68(229-230), pp.241-256.** |
| **17** | **Partnerships for the  goals** | **17.05** | **Adopt and implement investment promotion regimes for least developed  countries** |  |
| **17** | **Partnerships for the  goals** | **17.06** | **Enhance North-South, South-South and triangular regional and  international cooperation on and access to science, technology and innovation and enhance knowledge sharing on mutually agreed terms, including through improved coordination among existing mechanisms, in particular at the United Nations level, and through a global technology facilitation mechanism** |  |
| **17** | **Partnerships for the  goals** | **17.07** | **Promote the development, transfer, dissemination and diffusion of  environmentally sound technologies to developing countries on favourable terms, including on concessional and preferential terms, as mutually agreed** |  |
| **17** | **Partnerships for the  goals** | **17.08** | **Fully operationalize the technology bank and science, technology and  innovation capacity-building mechanism for least developed countries by 2017 and enhance the use of enabling technology, in particular information and communications technology** |  |
| **17** | **Partnerships for the  goals** | **17.09** | **Enhance international support for implementing effective and targeted  capacity-building in developing countries to support national plans to implement all the sustainable development goals, including through North-South, South-South and triangular cooperation** |  |
| **17** | **Partnerships for the  goals** | **17.1** | **Promote a universal, rules-based, open, non-discriminatory and  equitable multilateral trading system under the World Trade Organization, including through the conclusion of negotiations under its Doha Development Agenda** |  |
| **17** | **Partnerships for the  goals** | **17.11** | **Significantly increase the exports of developing countries, in particular  with a view to doubling the least developed countries’ share of global exports by 2020** |  |
| **17** | **Partnerships for the  goals** | **17.12** | **Realize timely implementation of duty-free and quota-free market  access on a lasting basis for all least developed countries, consistent with World Trade Organization decisions, including by ensuring that preferential rules of origin applicable to imports from least developed countries are transparent and simple, and contribute to facilitating market access** |  |
| **17** | **Partnerships for the  goals** | **17.13** | **Enhance global macroeconomic stability, including through policy  coordination and policy coherence** |  |
| **17** | **Partnerships for the  goals** | **17.14** | **Enhance policy coherence for sustainable development** |  |
| **17** | **Partnerships for the  goals** | **17.15** | **Respect each country’s policy space and leadership to establish and  implement policies for poverty eradication and sustainable development** |  |
| **17** | **Partnerships for the  goals** | **17.16** | **Enhance the global partnership for sustainable development,  complemented by multi-stakeholder partnerships that mobilize and share knowledge, expertise, technology and financial resources, to support the achievement of the sustainable development goals in all countries, in particular developing countries** | **Di Franco, A., Hogg, K.E., Calò, A., Bennett, N.J., Sévin-Allouet, M.A., Alaminos, O.E., Lang, M., Koutsoubas, D., Prvan, M., Santarossa, L. and Niccolini, F., 2020. Improving marine protected area governance through collaboration and co-production. Journal of Environmental Management, 269, p.110757.  Nelson, A., Johnson, G.L., Wenzel, L., Antoine, A., Avilla, L. and Manubag, M.L., 2019. Integrating social network development into marine protected area management capacity building and institutionalization in the Philippines and Indonesia. Aquatic Conservation: Marine and Freshwater Ecosystems, 29, pp.233-244.  Cvitanovic, C., Fulton, C.J., Wilson, S.K., van Kerhoff, L., Cripps, I.L., Muthiga, N. 2014. Utility of primary scientific literature to environmental managers: An international case study on coral-dominated marine protected areas. Ocean and Coastal Management, 102, p. 72-78  Teh, L.C.L., Teh, L.S.L and Chung, F.C. 2007. A private management approach to coral reef conservation in Sabah, Malaysia. Biodiversity and Conservation, 17, p. 3061-3077.  Araos, F. 2018. Navigating in Open Waters: Tensions and Agents in Marine Conservation in the Patagonia of Chile. REVISTA DE ESTUDIOS SOCIALES, 64, p.27-41.  Weeks: Within the context of community tenure over resources, identification of critical nursery habitats to improve the effectiveness of existing marine protected areas indicates where collaboration across community boundaries might be required. Outputs from these analyses are likely to be most useful in regions where management is highly decentralised, imposing spatial constraints on the size of individual protected areas.** |
| **17** | **Partnerships for the  goals** | **17.17** | **Encourage and promote effective public, public-private and civil society  partnerships, building on the experience and resourcing strategies of partnerships** |  |
| **17** | **Partnerships for the  goals** | **17.18** | **By 2020, enhance capacity-building support to developing countries,  including for least developed countries and small island developing States, to increase significantly the availability of high-quality, timely and reliable data disaggregated by income, gender, age, race, ethnicity, migratory status, disability, geographic location and other characteristics relevant in national contexts** |  |
| **17** | **Partnerships for the  goals** | **17.19** | **By 2030, build on existing initiatives to develop measurements of  progress on sustainable development that complement gross domestic product, and support statistical capacity-building in developing countries** |  |

Supplemental Figures


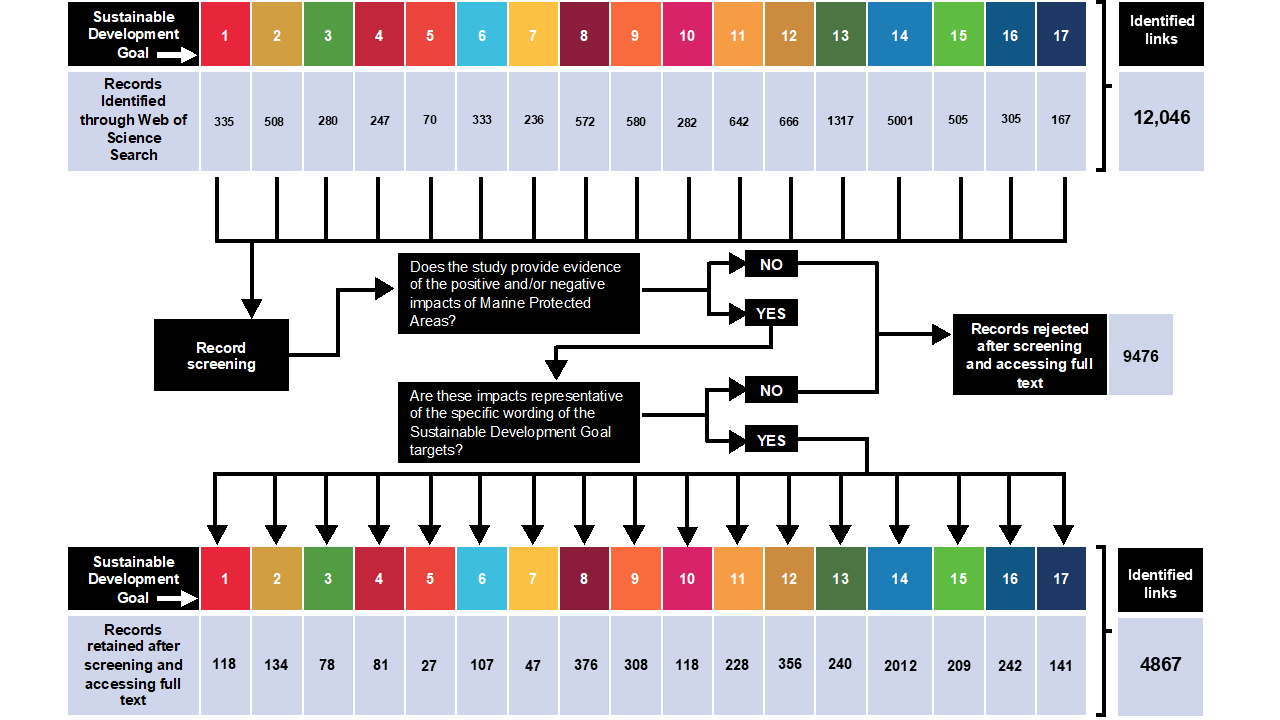


Figure S1. The process of our literature search which focused on searching the literature for papers making links to SDG areas. We conducted multiple screening stages to arrive at a final number of papers relevant for our study.
