# Supplementary material for: Area Based Conservation Tools Have Mixed Effects Across All SDGs but Research May Overstate Effects
Source: Research Square preprint supplement (doi:10.21203/rs.3.rs-6556547/v1), 2025-05-26
Supplement: Supplementary file 2 [file 6ca1d7c4cd96b1a2bc7c1721.xlsx]

## Sheet: Search component 1
COMPONENT 1 SEARCH TERMS Marine protected area
Reference	Search term		Unique search terms	Count	Include or exclude	Reason		Final search terms	Count	Include or exclude		Component 1 for Web of Science
Woodcock, P., O'Leary, B.C., Kaiser, M.J. and Pullin, A.S., 2017. Your evidence or mine? Systematic evaluation of reviews of marine protected area effectiveness. Fish and Fisheries, 18(4), pp.668-681.	marine reserve*		marine reserve*	6	1			marine reserve*	6	1		(("marine reserve*") OR ("marine protected area*") OR (marine AND park*) OR ("no-take zone*") OR ("marine sanctuar*) OR ("locally managed marine area*") OR (marine community-based conservation area*") OR ("marine conservation area*") OR ("marine protection") OR ("ocean conservation area*") OR ("other effective area-based conservation measure*"))
Woodcock, P., O'Leary, B.C., Kaiser, M.J. and Pullin, A.S., 2017. Your evidence or mine? Systematic evaluation of reviews of marine protected area effectiveness. Fish and Fisheries, 18(4), pp.668-681.	marine sanctuary		marine protected area*	6	1			marine protected area*	6	1
Woodcock, P., O'Leary, B.C., Kaiser, M.J. and Pullin, A.S., 2017. Your evidence or mine? Systematic evaluation of reviews of marine protected area effectiveness. Fish and Fisheries, 18(4), pp.668-681.	marine AND no-take zone		marine park	3	1			marine AND park*	3	1
Woodcock, P., O'Leary, B.C., Kaiser, M.J. and Pullin, A.S., 2017. Your evidence or mine? Systematic evaluation of reviews of marine protected area effectiveness. Fish and Fisheries, 18(4), pp.668-681.	marine AND harvest refug*		MPA	3	0	If MPA is present, so too should marine protected area		no-take zone*	3	1
Woodcock, P., O'Leary, B.C., Kaiser, M.J. and Pullin, A.S., 2017. Your evidence or mine? Systematic evaluation of reviews of marine protected area effectiveness. Fish and Fisheries, 18(4), pp.668-681.	marine AND buffer zone		no-take zone	3	1			marine sanctuar*	3	1
Woodcock, P., O'Leary, B.C., Kaiser, M.J. and Pullin, A.S., 2017. Your evidence or mine? Systematic evaluation of reviews of marine protected area effectiveness. Fish and Fisheries, 18(4), pp.668-681.	marine AND partial* AND protect*		marine sanctuar*	3	1			locally managed marine area*	1	1
Woodcock, P., O'Leary, B.C., Kaiser, M.J. and Pullin, A.S., 2017. Your evidence or mine? Systematic evaluation of reviews of marine protected area effectiveness. Fish and Fisheries, 18(4), pp.668-681.	marine AND closed area		community fisheries management area	1	0	Too general		marine community-based conservation area*	1	1
Woodcock, P., O'Leary, B.C., Kaiser, M.J. and Pullin, A.S., 2017. Your evidence or mine? Systematic evaluation of reviews of marine protected area effectiveness. Fish and Fisheries, 18(4), pp.668-681.	marine AND area closure		locally managed marine area	1	1			marine conservation area*	1	1
Woodcock, P., O'Leary, B.C., Kaiser, M.J. and Pullin, A.S., 2017. Your evidence or mine? Systematic evaluation of reviews of marine protected area effectiveness. Fish and Fisheries, 18(4), pp.668-681.	marine protected area		marine AND area closure	1	0	Should be covered by included terms		marine protection	1	1
Mizrahi, M.I., Diedrich, A., Weeks, R. and Pressey, R.L., 2019. A systematic review of the socioeconomic factors that influence how marine protected areas impact on ecosystems and livelihoods. Society & Natural Resources, 32(1), pp.4-20	marine protected area		marine AND buffer zone	1	0	Too general		ocean conservation area*	1	1
Mizrahi, M.I., Diedrich, A., Weeks, R. and Pressey, R.L., 2019. A systematic review of the socioeconomic factors that influence how marine protected areas impact on ecosystems and livelihoods. Society & Natural Resources, 32(1), pp.4-21	MPA		marine AND closed area	1	0	Should be covered by included terms		Other effective area-based conservation measure*	0	NEW TERM
Mizrahi, M.I., Diedrich, A., Weeks, R. and Pressey, R.L., 2019. A systematic review of the socioeconomic factors that influence how marine protected areas impact on ecosystems and livelihoods. Society & Natural Resources, 32(1), pp.4-22	marine reserve*		marine AND community conservation	1	0	Use other community terms		TOTAL NUMBER OF TERMS		11
Mizrahi, M.I., Diedrich, A., Weeks, R. and Pressey, R.L., 2019. A systematic review of the socioeconomic factors that influence how marine protected areas impact on ecosystems and livelihoods. Society & Natural Resources, 32(1), pp.4-23	locally managed marine area		marine AND community-based conservation	1	0	Use other community terms
Mizrahi, M.I., Diedrich, A., Weeks, R. and Pressey, R.L., 2019. A systematic review of the socioeconomic factors that influence how marine protected areas impact on ecosystems and livelihoods. Society & Natural Resources, 32(1), pp.4-24	community fisheries management area		marine AND harvest refug*	1	0	Not a common term
Mizrahi, M.I., Diedrich, A., Weeks, R. and Pressey, R.L., 2019. A systematic review of the socioeconomic factors that influence how marine protected areas impact on ecosystems and livelihoods. Society & Natural Resources, 32(1), pp.4-25	marine fisheries management area		marine AND no-take zone	1	0	Use other no-take term
Mizrahi, M.I., Diedrich, A., Weeks, R. and Pressey, R.L., 2019. A systematic review of the socioeconomic factors that influence how marine protected areas impact on ecosystems and livelihoods. Society & Natural Resources, 32(1), pp.4-26	no-take zone		marine AND partial* AND protect*	1	0	Should be covered by included terms
Mizrahi, M.I., Diedrich, A., Weeks, R. and Pressey, R.L., 2019. A systematic review of the socioeconomic factors that influence how marine protected areas impact on ecosystems and livelihoods. Society & Natural Resources, 32(1), pp.4-27	marine national monument		marine AND participatory management	1	0	Use other community terms
Mizrahi, M.I., Diedrich, A., Weeks, R. and Pressey, R.L., 2019. A systematic review of the socioeconomic factors that influence how marine protected areas impact on ecosystems and livelihoods. Society & Natural Resources, 32(1), pp.4-28	marine park		marine closed area	1	0	Not a common term
Mizrahi, M.I., Diedrich, A., Weeks, R. and Pressey, R.L., 2019. A systematic review of the socioeconomic factors that influence how marine protected areas impact on ecosystems and livelihoods. Society & Natural Resources, 32(1), pp.4-29	traditional management		marine community territor*	1	0	Removed in favour of other community terms
Gallacher, J., Simmonds, N., Fellowes, H., Brown, N., Gill, N., Clark, W., Biggs, C. and Rodwell, L.D., 2016. Evaluating the success of a marine protected area: a systematic review approach. Journal of environmental management, 183, pp.280-293.	marine protected area		marine community-based conservation area*	1	1
Gallacher, J., Simmonds, N., Fellowes, H., Brown, N., Gill, N., Clark, W., Biggs, C. and Rodwell, L.D., 2016. Evaluating the success of a marine protected area: a systematic review approach. Journal of environmental management, 183, pp.280-293.	marine reserve*		marine conservation area*	1	1
Gallacher, J., Simmonds, N., Fellowes, H., Brown, N., Gill, N., Clark, W., Biggs, C. and Rodwell, L.D., 2016. Evaluating the success of a marine protected area: a systematic review approach. Journal of environmental management, 183, pp.280-293.	marine refugia		marine conservation zone	1	0	More specific to UK
Gallacher, J., Simmonds, N., Fellowes, H., Brown, N., Gill, N., Clark, W., Biggs, C. and Rodwell, L.D., 2016. Evaluating the success of a marine protected area: a systematic review approach. Journal of environmental management, 183, pp.280-293.	marine refuge		marine conserved area*	1	0	Removed to reduce numer of terms
Gallacher, J., Simmonds, N., Fellowes, H., Brown, N., Gill, N., Clark, W., Biggs, C. and Rodwell, L.D., 2016. Evaluating the success of a marine protected area: a systematic review approach. Journal of environmental management, 183, pp.280-293.	MPA		marine fisheries management area	1	0	Too general
Gallacher, J., Simmonds, N., Fellowes, H., Brown, N., Gill, N., Clark, W., Biggs, C. and Rodwell, L.D., 2016. Evaluating the success of a marine protected area: a systematic review approach. Journal of environmental management, 183, pp.280-293.	marine park		marine management	1	0	Too general
Gallacher, J., Simmonds, N., Fellowes, H., Brown, N., Gill, N., Clark, W., Biggs, C. and Rodwell, L.D., 2016. Evaluating the success of a marine protected area: a systematic review approach. Journal of environmental management, 183, pp.280-293.	partial closure		marine national monument	1	0	Opted to use marine national park
Gallacher, J., Simmonds, N., Fellowes, H., Brown, N., Gill, N., Clark, W., Biggs, C. and Rodwell, L.D., 2016. Evaluating the success of a marine protected area: a systematic review approach. Journal of environmental management, 183, pp.280-293.	no-take zone		marine national park	1	0	Removed as already including marine park
Gallacher, J., Simmonds, N., Fellowes, H., Brown, N., Gill, N., Clark, W., Biggs, C. and Rodwell, L.D., 2016. Evaluating the success of a marine protected area: a systematic review approach. Journal of environmental management, 183, pp.280-293.	marine conservation zone		marine protection	1	1
Mangano, M.C., O’Leary, B.C., Mirto, S., Mazzola, A. and Sarà, G., 2015. The comparative biological effects of spatial management measures in protecting marine biodiversity: a systematic review protocol. Environmental Evidence, 4(1), pp.1-8.	marine protected area		marine refuge	1	0	Too general
Mangano, M.C., O’Leary, B.C., Mirto, S., Mazzola, A. and Sarà, G., 2015. The comparative biological effects of spatial management measures in protecting marine biodiversity: a systematic review protocol. Environmental Evidence, 4(1), pp.1-8.	marine reserve*		marine refugia	1	0	Too general
Mangano, M.C., O’Leary, B.C., Mirto, S., Mazzola, A. and Sarà, G., 2015. The comparative biological effects of spatial management measures in protecting marine biodiversity: a systematic review protocol. Environmental Evidence, 4(1), pp.1-8.	marine sanctuary		ocean conservation area*	1	1
Mangano, M.C., O’Leary, B.C., Mirto, S., Mazzola, A. and Sarà, G., 2015. The comparative biological effects of spatial management measures in protecting marine biodiversity: a systematic review protocol. Environmental Evidence, 4(1), pp.1-8.	marine park		partial closure	1	0	Too general
Mangano, M.C., O’Leary, B.C., Mirto, S., Mazzola, A. and Sarà, G., 2015. The comparative biological effects of spatial management measures in protecting marine biodiversity: a systematic review protocol. Environmental Evidence, 4(1), pp.1-8.	marine protection		traditional management	1	0	Too general
Mangano, M.C., O’Leary, B.C., Mirto, S., Mazzola, A. and Sarà, G., 2015. The comparative biological effects of spatial management measures in protecting marine biodiversity: a systematic review protocol. Environmental Evidence, 4(1), pp.1-8.	marine management		TOTAL NUMBER OF TERMS		10
Mangano, M.C., O’Leary, B.C., Mirto, S., Mazzola, A. and Sarà, G., 2015. The comparative biological effects of spatial management measures in protecting marine biodiversity: a systematic review protocol. Environmental Evidence, 4(1), pp.1-8.	no-take zone
Mangano, M.C., O’Leary, B.C., Mirto, S., Mazzola, A. and Sarà, G., 2015. The comparative biological effects of spatial management measures in protecting marine biodiversity: a systematic review protocol. Environmental Evidence, 4(1), pp.1-8.	marine closed area
Cetas, E.R. and Yasué, M., 2017. A systematic review of motivational values and conservation success in and around protected areas. Conservation Biology, 31(1), pp.203-212.	MPA
Cetas, E.R. and Yasué, M., 2017. A systematic review of motivational values and conservation success in and around protected areas. Conservation Biology, 31(1), pp.203-212.	marine protected area
Cetas, E.R. and Yasué, M., 2017. A systematic review of motivational values and conservation success in and around protected areas. Conservation Biology, 31(1), pp.203-212.	marine reserve*
Cetas, E.R. and Yasué, M., 2017. A systematic review of motivational values and conservation success in and around protected areas. Conservation Biology, 31(1), pp.203-212.	marine national park
Cetas, E.R. and Yasué, M., 2017. A systematic review of motivational values and conservation success in and around protected areas. Conservation Biology, 31(1), pp.203-212.	marine AND community-based conservation
Cetas, E.R. and Yasué, M., 2017. A systematic review of motivational values and conservation success in and around protected areas. Conservation Biology, 31(1), pp.203-212.	marine AND participatory management
Cetas, E.R. and Yasué, M., 2017. A systematic review of motivational values and conservation success in and around protected areas. Conservation Biology, 31(1), pp.203-212.	marine AND community conservation
Ban, N.C., Gurney, G.G., Marshall, N.A., Whitney, C.K., Mills, M., Gelcich, S., Bennett, N.J., Meehan, M.C., Butler, C., Ban, S. and Tran, T.C., 2019. Well-being outcomes of marine protected areas. Nature Sustainability, 2(6), pp.524-532	marine protected area*
Ban, N.C., Gurney, G.G., Marshall, N.A., Whitney, C.K., Mills, M., Gelcich, S., Bennett, N.J., Meehan, M.C., Butler, C., Ban, S. and Tran, T.C., 2019. Well-being outcomes of marine protected areas. Nature Sustainability, 2(6), pp.524-533	marine reserve*
Ban, N.C., Gurney, G.G., Marshall, N.A., Whitney, C.K., Mills, M., Gelcich, S., Bennett, N.J., Meehan, M.C., Butler, C., Ban, S. and Tran, T.C., 2019. Well-being outcomes of marine protected areas. Nature Sustainability, 2(6), pp.524-534	marine conservation area*
Ban, N.C., Gurney, G.G., Marshall, N.A., Whitney, C.K., Mills, M., Gelcich, S., Bennett, N.J., Meehan, M.C., Butler, C., Ban, S. and Tran, T.C., 2019. Well-being outcomes of marine protected areas. Nature Sustainability, 2(6), pp.524-535	marine sanctuar*
Ban, N.C., Gurney, G.G., Marshall, N.A., Whitney, C.K., Mills, M., Gelcich, S., Bennett, N.J., Meehan, M.C., Butler, C., Ban, S. and Tran, T.C., 2019. Well-being outcomes of marine protected areas. Nature Sustainability, 2(6), pp.524-536	marine conserved area*
Ban, N.C., Gurney, G.G., Marshall, N.A., Whitney, C.K., Mills, M., Gelcich, S., Bennett, N.J., Meehan, M.C., Butler, C., Ban, S. and Tran, T.C., 2019. Well-being outcomes of marine protected areas. Nature Sustainability, 2(6), pp.524-537	marine community territor*
Ban, N.C., Gurney, G.G., Marshall, N.A., Whitney, C.K., Mills, M., Gelcich, S., Bennett, N.J., Meehan, M.C., Butler, C., Ban, S. and Tran, T.C., 2019. Well-being outcomes of marine protected areas. Nature Sustainability, 2(6), pp.524-538	ocean conservation area*
Ban, N.C., Gurney, G.G., Marshall, N.A., Whitney, C.K., Mills, M., Gelcich, S., Bennett, N.J., Meehan, M.C., Butler, C., Ban, S. and Tran, T.C., 2019. Well-being outcomes of marine protected areas. Nature Sustainability, 2(6), pp.524-539	marine community-based conservation area*

## Sheet: Search Strings
SDG		Search string ("MPA componet" AND "SDG component")	Search results	% of total	Unique references	% unique	Shared references	% shared
1	No Poverty	AB=((("marine reserve*") OR ("marine protected area*") OR (marine AND park*) OR ("no-take zone*") OR ("marine sanctuar*) OR ("locally managed marine area*") OR (marine community-based conservation area*") OR ("marine conservation area*") OR ("marine protection") OR ("ocean conservation area*") OR ("other effective area-based conservation measure*")) AND ((poverty) OR (poor)OR(ownership)))	335	2.78101	36	10.7463	299	89.2537
2	Zero hunger	AB=((("marine reserve*") OR ("marine protected area*") OR (marine AND park*) OR ("no-take zone*") OR ("marine sanctuar*) OR ("locally managed marine area*") OR (marine community-based conservation area*") OR ("marine conservation area*") OR ("marine protection") OR ("ocean conservation area*") OR ("other effective area-based conservation measure*")) AND ((hunger) OR (nutrition*) OR (food)))	508	4.21717	88	17.3228	420	82.6772
3	Good health and well-being	AB=((("marine reserve*") OR ("marine protected area*") OR (marine AND park*) OR ("no-take zone*") OR ("marine sanctuar*) OR ("locally managed marine area*") OR (marine community-based conservation area*") OR ("marine conservation area*") OR ("marine protection") OR ("ocean conservation area*") OR ("other effective area-based conservation measure*")) AND ((epidemic) OR (health-care)OR(disease*)OR(…	280	2.32442	64	22.8571	216	77.1429
4	Quality education	AB=((("marine reserve*") OR ("marine protected area*") OR (marine AND park*) OR ("no-take zone*") OR ("marine sanctuar*) OR ("locally managed marine area*") OR (marine community-based conservation area*") OR ("marine conservation area*") OR ("marine protection") OR ("ocean conservation area*") OR ("other effective area-based conservation measure*")) AND ((education*) OR (youth) OR (scholarship*)))	247	2.05047	28	11.336	219	88.664
5	Gender equality	AB=((("marine reserve*") OR ("marine protected area*") OR (marine AND park*) OR ("no-take zone*") OR ("marine sanctuar*) OR ("locally managed marine area*") OR (marine community-based conservation area*") OR ("marine conservation area*") OR ("marine protection") OR ("ocean conservation area*") OR ("other effective area-based conservation measure*")) AND ((gender) OR (women*) OR (girl*) OR ("equal…	70	0.581106	5	7.14286	65	92.8571
6	Clean water and sanitation	AB=((("marine reserve*") OR ("marine protected area*") OR (marine AND park*) OR ("no-take zone*") OR ("marine sanctuar*) OR ("locally managed marine area*") OR (marine community-based conservation area*") OR ("marine conservation area*") OR ("marine protection") OR ("ocean conservation area*") OR ("other effective area-based conservation measure*")) AND (("water quality") OR (sanitation) OR (chem…	333	2.7644	68	20.4204	265	79.5796
7	Affordable and clean energy	AB=((("marine reserve*") OR ("marine protected area*") OR (marine AND park*) OR ("no-take zone*") OR ("marine sanctuar*) OR ("locally managed marine area*") OR (marine community-based conservation area*") OR ("marine conservation area*") OR ("marine protection") OR ("ocean conservation area*") OR ("other effective area-based conservation measure*")) AND ((energy) OR (renewable*) OR (fossil-fuel*)…	236	1.95916	56	23.7288	180	76.2712
8	Decent work and economic growth	AB=((("marine reserve*") OR ("marine protected area*") OR (marine AND park*) OR ("no-take zone*") OR ("marine sanctuar*) OR ("locally managed marine area*") OR (marine community-based conservation area*") OR ("marine conservation area*") OR ("marine protection") OR ("ocean conservation area*") OR ("other effective area-based conservation measure*")) AND ((job*) OR (employment) OR (tourism)OR(ecot…	572	4.74846	65	11.3636	507	88.6364
9	Industries, innovation and infrastructure	AB=((("marine reserve*") OR ("marine protected area*") OR (marine AND park*) OR ("no-take zone*") OR ("marine sanctuar*) OR ("locally managed marine area*") OR (marine community-based conservation area*") OR ("marine conservation area*") OR ("marine protection") OR ("ocean conservation area*") OR ("other effective area-based conservation measure*")) AND ((infrastructure) OR (industr*)OR("developi…	580	4.81488	58	10	522	90
10	Reduced inequalities	AB=((("marine reserve*") OR ("marine protected area*") OR (marine AND park*) OR ("no-take zone*") OR ("marine sanctuar*) OR ("locally managed marine area*") OR (marine community-based conservation area*") OR ("marine conservation area*") OR ("marine protection") OR ("ocean conservation area*") OR ("other effective area-based conservation measure*")) AND ((inequalit*) OR (equal*) OR ("discriminat*…	282	2.34103	43	15.2482	239	84.7518
11	Sustainable cities and communities	AB=((("marine reserve*") OR ("marine protected area*") OR (marine AND park*) OR ("no-take zone*") OR ("marine sanctuar*) OR ("locally managed marine area*") OR (marine community-based conservation area*") OR ("marine conservation area*") OR ("marine protection") OR ("ocean conservation area*") OR ("other effective area-based conservation measure*")) AND ((hous*) OR (heritage)OR(cultur*)OR(accessi…	642	5.32957	110	17.134	532	82.866
12	Responsible consumption and production	AB=((("marine reserve*") OR ("marine protected area*") OR (marine AND park*) OR ("no-take zone*") OR ("marine sanctuar*) OR ("locally managed marine area*") OR (marine community-based conservation area*") OR ("marine conservation area*") OR ("marine protection") OR ("ocean conservation area*") OR ("other effective area-based conservation measure*")) AND ((consumption) OR (production)OR("natural r…	666	5.52881	72	10.8108	594	89.1892
13	Climate action	AB=((("marine reserve*") OR ("marine protected area*") OR (marine AND park*) OR ("no-take zone*") OR ("marine sanctuar*) OR ("locally managed marine area*") OR (marine community-based conservation area*") OR ("marine conservation area*") OR ("marine protection") OR ("ocean conservation area*") OR ("other effective area-based conservation measure*")) AND ((climate) OR (mitigat*) OR (adapt*)OR(resi…	1317	10.9331	191	14.5027	1126	85.4973
14	Life below water	AB=((("marine reserve*") OR ("marine protected area*") OR (marine AND park*) OR ("no-take zone*") OR ("marine sanctuar*) OR ("locally managed marine area*") OR (marine community-based conservation area*") OR ("marine conservation area*") OR ("marine protection") OR ("ocean conservation area*") OR ("other effective area-based conservation measure*")) AND ((fisher*)OR(overfish*) OR (pollut*) OR (re…	5001	41.5159	268	5.35893	4733	94.6411
15	Life on land	AB=((("marine reserve*") OR ("marine protected area*") OR (marine AND park*) OR ("no-take zone*") OR ("marine sanctuar*) OR ("locally managed marine area*") OR (marine community-based conservation area*") OR ("marine conservation area*") OR ("marine protection") OR ("ocean conservation area*") OR ("other effective area-based conservation measure*")) AND ( (reforestation)OR(terrestrial)OR(alien)OR…	505	4.19226	108	21.3861	397	78.6139
16	Peace, Justic and strong institutions	AB=((("marine reserve*") OR ("marine protected area*") OR (marine AND park*) OR ("no-take zone*") OR ("marine sanctuar*) OR ("locally managed marine area*") OR (marine community-based conservation area*") OR ("marine conservation area*") OR ("marine protection") OR ("ocean conservation area*") OR ("other effective area-based conservation measure*")) AND ((violen*) OR (justice) OR (corrupt*)OR(dec…	305	2.53196	32	10.4918	273	89.5082
17	Partnerships for the goals	AB=((("marine reserve*") OR ("marine protected area*") OR (marine AND park*) OR ("no-take zone*") OR ("marine sanctuar*) OR ("locally managed marine area*") OR (marine community-based conservation area*") OR ("marine conservation area*") OR ("marine protection") OR ("ocean conservation area*") OR ("other effective area-based conservation measure*")) AND ((debt) OR (partnership)OR("development goa…	167	1.38635	18	10.7784	149	89.2216
TOTAL			12046
TOTAL			6656

## Sheet: Worksheet1
Data record	SDG	Article Title	Title screen (1=Include; 0=Remove)	Abstract	Abstract screen (1=Include; 0=Remove)	DOI	Full read screen (1=Include; 0=Remove)	Notes
1	SDG1: No Poverty	Mainstreaming marine biodiversity into the SDGs: The role of other effective area-based conservation measures (SDG 14.5)	1	This article explores the concept of other effective area-based conservation measures (OECMs) in the context of the UN Convention on Biological Diversity (CBD) Aichi Biodiversity Target 11 on marine protected areas and OECMs and its linkages to the Sustainable Development Goals (SDGs). It argues that mainstreaming biodiversity through CBD Aichi Biodiversity Targets' implementation into the SDGs c…	1	https://doi.org/10.1016/j.marpol.2017.08.019
2	SDG1: No Poverty	Shortfalls and Solutions for Meeting National and Global Conservation Area Targets	0	Governments have committed to conserving 17% of terrestrial and 10% of marine environments globally, especially areas of particular importance for biodiversity through ecologically representative Protected Area (PA) systems or other area-based conservation measures, while individual countries have committed to conserve 3-50% of their land area. We estimate that PAs currently cover 14.6% of terres…	0	https://doi.org/10.1111/conl.12158
3	SDG1: No Poverty	Interactions Between Spatially Explicit Conservation and Management Measures: Implications for the Governance of Marine Protected Areas	1	Marine protected areas are not established in an institutional and governance vacuum and managers should pay attention to the wider social-ecological system in which they are immersed. This article examines Islas Choros-Damas Marine Reserve, a small marine protected area located in a highly productive and biologically diverse coastal marine ecosystem in northern Chile, and the interactions betwee…	1	https://doi.org/10.1007/s00267-013-0167-9
4	SDG1: No Poverty	Experience with marine protected area planning and management in the Philippines	0	Marine protected areas were established in the Philippines as early as 1974. These early models on Sumilon and Apo Islands and others set forth a framework for coral reef management that has been shown to enhance fish yields to traditional fishers as well as protect and maintain nearshore coral reef habitats for biodiversity and multiple economic uses. The history of marine protected areas in the…	0	https://doi.org/10.1080/08920750252692599
5	SDG1: No Poverty	Coastal poverty and MPA management in mainland Tanzania and Zanzibar	1	Poverty and resource degradation are persistent features of the lives of a large proportion of the coastal people of Tanzania and Zanzibar. A useful question to raise in preparing poverty reduction and resource management strategies is therefore how does marine protected area management impact the lives of the poor and reduce poverty? This paper summarizes selected results of a study on poverty a…	1	https://doi.org/10.1016/j.ocecoaman.2006.08.002
6	SDG1: No Poverty	The potential for dive tourism led entrepreneurial marine protected areas in Curacao	1	Despite the successful establishment of marine protected areas in the Netherlands Antilles, such as Saba and Bonaire, government-led protection of the reefs surrounding Curacao has repeatedly failed. In the absence of effective state regulation, dive operations have taken de facto control over dive sites, establishing conservation through a range of private initiatives akin to what have been refe…	1	https://doi.org/10.1016/j.marpol.2010.03.004
7	SDG1: No Poverty	Legal protection is not enough: Posidonia oceanica meadows in marine protected areas are not healthier than those in unprotected areas of the northwest Mediterranean Sea	0	Using the Conservation Index, which measures the proportional amount of dead matte relative to live Posidonia oceanica, we assessed the health of 15 P. oceanica meadows at a regional scale along the coast of Liguria (NW Mediterranean). These areas were characterized by different degrees of anthropization, from highly urbanized sites to marine protected areas. Two different scenarios were identifi…	0	https://doi.org/10.1016/j.marpolbul.2008.12.001
8	SDG1: No Poverty	Beyond Success: Community, Governance, and the Future of Cabo Pulmo National Park	1	This paper uses Cabo Pulmo National Park (CPNP) as a case study to examine the successes and challenges of Marine Protected Area (MPA) design, conception, and long-term governance. Drawing from literature in environmental anthropology, political ecology, and conservation, the author argues for a renewed examination of the 'success' of CPNP that pays greater attention to the relationship between s…	1
9	SDG1: No Poverty	Learning from disaster: community-based marine protected areas in Fiji	1	This paper examines whether and how experiencing climate-related disasters can improve the rural poor's adaptation to climate change through community-based resource management. Original household survey data in Fiji capture the establishment of community-based marine protected areas following a tropical cyclone. Controlling for the endogeneity of household-level cyclone damage reveals that a hou…	1	https://doi.org/10.1017/S1355770X15000108
10	SDG1: No Poverty	Human and climatic drivers affect spatial fishing patterns in a multiple-use marine protected area: The Galapagos Marine Reserve	0	Assessments of the effectiveness of marine protected areas (MPAs) usually assume that fishing patterns change exclusively due to the implementation of an MPA. This assumption increases the risk of erroneous conclusions in assessing marine zoning, and consequently counter-productive management actions. Accordingly, it is important to understand how fishers respond to a combination of the implement…	0	https://doi.org/10.1371/journal.pone.0228094
11	SDG1: No Poverty	Exploring Social Resilience in Madagascar's Marine Protected Areas	1	We examined and compared aspects of local-level resilience in 13 coastal communities within and adjacent to all of Madagascar's national marine protected areas. Our examination of social resilience focused on indicators of the flexibility of household livelihood portfolios and both formal and informal governance institutions, the capacity of communities to organize, their capacity to learn, and a…	1
12	SDG1: No Poverty	Shifting baselines in fishers' perceptions of island reef fishery degradation	0	We present the first quantified evidence of shifting environmental baselines from an island coral reef fishery (Rodrigues). As depletion of commercial fish species spreads out from the coast youngsters share few of their elders' memories of former abundance. Of three generations, the oldest reported more fish species as depleted (p <= 0.001), including predators indicative of ecosystem health and…	0	https://doi.org/10.1016/j.ocecoaman.2007.09.006
13	SDG1: No Poverty	Coral reefs of Bocas del Toro, Panama: III Distribution, structure, diversity and conservation status of reefs in Pastores, Cristobal, Popa and Cayo Agua islands	0	Previous studies reported low coral diversity and poor reef development inside the marine protected area of Isla Bastimentos (PNMIB), and it was recommended to widen the survey further east into other areas of the archipelago of Bocas del Toro. This study describes reef distribution, structure and status in 24 reefs along ca. 107 km of coastline in Pastores, Cristobal, Popa and Agua islands. We d…	0
14	SDG1: No Poverty	Critical analysis of the governance of the Sainte Luce Locally Managed Marine Area (LMMA), southeast Madagascar	1	The Marine Protected Area Governance (MPAG) framework is applied to critically assess the governance of the Sainte Luce Locally Managed Marine Area (LMMA), southeast Madagascar. Madagascar experiences rapid population growth, widespread poverty, corruption and political instability, which hinders natural resource governance. Community-based natural resource management (CBNRM) has been repeatedly …	1	https://doi.org/10.1016/j.marpol.2019.103691
15	SDG1: No Poverty	Northern Australia-indigenous fisheries management	1	Indigenous people were the first custodians and managers of Australia's fisheries resources (Coleman et al. 2003). While European colonization of Australia occurred in 1788, it has been only in recent history that indigenous peoples' affiliations with the land and sea have been formally identified and recognized by governments. These affiliations result from indigenous ownership, occupation, use,…	1
16	SDG1: No Poverty	Collaborative development of management options for an artisanal fishery for seahorses in the central Philippines	0	Overexploitation and habitat degradation threaten small-scale, artisanal fisheries around the world. Management of these fisheries is often inadequate or absent, partly because they are data poor. We here present the development of management options for such a fishery, using collaborative input from a variety of interested groups. Qualitative and semi-quantitative assessments of seahorse populat…	0	https://doi.org/10.1016/j.ocecoaman.2004.02.002
17	SDG1: No Poverty	Offshore marine protected areas: Divergent perceptions of divers and artisanal fishers	1	Thorough comprehension of the perceptions of offshore Marine Protected Areas (MPAs) by different local social actors is lacking, especially in developing countries. This study aims to analyze the perceptions and socioeconomic characteristics of divers and artisanal fishers of an offshore MPA, located in Brazilian waters. Data on the perceptions, conflicts, and management of the MPA were gathered …	1	https://doi.org/10.1016/j.marpol.2016.11.016
18	SDG1: No Poverty	Combining human preference and biodiversity priorities for marine protected area site selection in Sabah, Malaysia	0	High human reliance on marine resources in developing countries is a challenge for implementing marine protected areas, which usually seek to limit or restrict fishing in selected areas. Fishers' spatial preferences should be considered during the site selection process, but biodiversity considerations are generally the primary focus. The Protected Area Suitability Index (PASI) is a fuzzy logic s…	0	https://doi.org/10.1016/j.biocon.2013.09.002
19	SDG1: No Poverty	Prospects for Transboundary Marine Protected Areas in East Africa	1	Transboundary marine protected areas have been proposed in East Africa to tackle threats to marine biodiversity, meet international MPA targets, promote tourism, and contribute to poverty reduction. This article examines what may drive, facilitate, or constrain states in creating a regime for transboundary MPAs. In East Africa, a regime between Mozambique and Tanzania is not yet formed and may be…	1	https://doi.org/10.1080/00908320.2012.672297
20	SDG1: No Poverty	Testing the utility of abiotic surrogates for marine habitat mapping at scales relevant to management	0	Habitat mapping at the scale at which marine protected areas are designed and managed is essential for assessment of, and design for, representation. Most habitat mapping studies rely solely or in part on abiotic surrogates for patterns of biodiversity. The utility of abiotic variables in predicting biological distributions at the local scale (10s of km) was tested in a remote video survey of mac…	0	https://doi.org/10.1016/j.biocon.2003.12.001
21	SDG1: No Poverty	Mind the gap Addressing the shortcomings of marine protected areas through large scale marine spatial planning	0	A blind faith in the ability of MPAs to counteract loss of biodiversity is fraught with risk especially when MPAs are poorly planned and when the consequences of establishing MPAs are not adequately thought out MPA shortcomings are categorized as one of five main types (1) MPAs that by virtue of their small size or poor design are ecologically insufficient (2) inappropriately planned or managed M…	0	https://doi.org/10.1016/j.marpol.2010.10.006
22	SDG1: No Poverty	Sediment quality assessment as potential tool for the management of tropical estuarine protected areas in SW Atlantic, Brazil	0	Marine Protected Areas (MPAs) represent a tool for conservation that is intended to protect marine and estuarine habitats, biodiversity, and ecological processes. Many MPAs, some of which include estuarine zones, are affected by contamination sources; the discharge of chemicals into aquatic systems results in sediment contamination, risks to benthic systems, and consequent negative effects on eco…	0	https://doi.org/10.1016/j.ecolind.2018.12.052
23	SDG1: No Poverty	Perception of natural habitat changes of West African marine protected areas	0	The evolution of marine protected areas (MPAs) in West Africa is reviewed through a survey of managers' perception carried on between 2017 and 2018 for the establishment of the baseline of MPAs of the Network of Marine Protected Areas of West Africa (RAMPAO). Managers report that all natural habitats are subject to surface area losses. The most affected habitats were beaches, mudflats and estuari…	0	https://doi.org/10.1016/j.ocecoaman.2020.105120
24	SDG1: No Poverty	Untangling worldwide conflicts in marine protected areas: Five lessons from the five continents	0	As the number of world Marine Protected Areas (MPAs) has been steadily increasing in the last decades, confrontations within them may have followed the same path. In order to unravel worldwide conservation conflicts in MPAs, a literature review was done. By doing so, five lessons were learnt: (1) 87 MPAs in the five continents have reported conflicts in the literature; (2) The increase in the num…	0	https://doi.org/10.1016/j.marpol.2020.104185
25	SDG1: No Poverty	Characterization of purse seine fishery of Ziama Bay (Gulf of Bejaia, SW Mediterranean): Implications for sustainability management	0	The establishment of marine protected areas (MPAs) in Algeria faces several obstacles, particularly lack of legislation and poor management of local resources. The attempt to establish an MPA at Taza (Gulf of Bejaia, SW Mediterranean) is part of a broader project to set up a network of MPAs in the Mediterranean basin. The MPA of Taza was first proposed by the staff of Taza National Park in 2000, …	0	https://doi.org/10.1016/j.ocecoaman.2019.03.024
26	SDG1: No Poverty	Conservation of coastal stingrays: seasonal abundance and population structure of the short-tailed stingray Dasyatis brevicaudata at a Marine Protected Area	0	Elasmobranch (shark, ray, and skate) populations around the world are in decline, and effective conservation measures are urgently needed. Marine Protected Areas (MPA) placed in locations important for key life-history stages may form part of an effective conservation strategy. In this context, we examined the seasonal abundance and population structure of the short-tailed stingray (Dasyatis brev…	0	https://doi.org/10.1093/icesjms/fss120
27	SDG1: No Poverty	Marine reserves: Parks, baselines, and fishery enhancement	0	Coastal zones are usually managed with two main objectives: (1) conservation/maintenance of biodiversity and. intrinsic ecosystem services and (2) maintenance of sustainable fisheries. The management needs that can be met with marine protected areas fall into corresponding categories. First, fully protected (that is, no-take) reserves-parks-offer benchmarks and protect ecosystem integrity while e…	0
28	SDG1: No Poverty	Optimizing voluntary compliance in marine protected areas: A comparison of recreational fisher and enforcement officer perspectives using multi-criteria analysis	0	A comprehensive list of planning criteria for optimizing compliance in Marine Protected Areas (MPAs) was compiled and used to compare the views of recreational fishers and compliance officers for facilitating voluntary compliance in the Port Stephens - Great Lakes Marine Park (PSGLMP). Expert working groups were tasked separately with: 1) criteria identification and weighting; 2) scoring of no-ta…	0	https://doi.org/10.1016/j.jenvman.2011.05.022
29	SDG1: No Poverty	Marine Protected Dramas: The Flaws of the Brazilian National System of Marine Protected Areas	1	This article discusses the current problems and issues associated with the implementation of a National System of Marine Protected Areas in Brazil. MPA managers and higher governmental level authorities were interviewed about their perceptions of the implementation of a national MPA strategy and the recent changes in the institutional arrangement of government marine conservation agencies. Interv…	1	https://doi.org/10.1007/s00267-010-9554-7
30	SDG1: No Poverty	Implementing California's Nearshore Fishery Management Plan - twelve years later	0	The Nearshore Fishery Management Plan (NFMP) mandated by California's Marine Life Management Act of 1998 was adopted by the California Fish and Game Commission in October 2002. The NFMP provides a framework for managing the nearshore species complex under joint state-federal authority using more conservative measures, while in close coordination with federal management. Since 2002, the California…	0
31	SDG1: No Poverty	Coastal livelihoods, poverty and well-being in Mexico. A case study of institutional and social constraints	1	The aim of this study is twofold. First, it explores the local discourses of poverty and well-being in a fishing community in Baja California Sur, Mexico. Second, the study examines the several constraints that fishers face for secure and sustainable livelihoods. The assessment used the sustainable livelihoods framework as analytical approach. The study concluded that poverty and marginalization …	1	https://doi.org/10.1007/s11852-014-0329-9
32	SDG1: No Poverty	Incorporating seascape connectivity in conservation prioritisation	1	In conservation prioritisation, it is often implicit that representation targets for individual habitat types act as surrogates for the species that inhabit them. Yet for many commercially and ecologically important coral reef fish species, connectivity among different habitats in a seascape may be more important than any single habitat alone. Approaches to conservation prioritisation that consid…	1	https://doi.org/10.1371/journal.pone.0182396
33	SDG1: No Poverty	CASE STUDIES OF CHANGES IN THE STRUCTURE OF REEF LAGOON FISHERIES OFF SOUTHERN KENYA	1	This study analyzes changes occurring within shallow lagoon fisheries on the Kenyan south coast. The data were gathered at two intervals over a span of ten years at four selected sites: Mwaepe, Mvuleni, Chale, and Gazi. The four case studies offer different insights into the approaches of the artisanal fishers in coping with changing social circumstances, which in turn influence the fishers' atti…	1
34	SDG1: No Poverty	When good intentions are not enough ... Insights on networks of paper park marine protected areas	1	In efforts to protect the world's oceans, the Convention on Biological Diversity has moved the goal of establishing marine protected areas (MPAs) to cover 10% of the ocean from 2012 to 2020. This adjustment suggests that the rush to establish MPAs without proper resources does not resolve conservation problems. In fact, such actions may create a false sense of protection that camouflages degradat…	1	https://doi.org/10.1111/j.1755-263X.2012.00303.x
35	SDG1: No Poverty	Philippine Alliance of Fisherfolk: Ecohealth Practitioners for Livelihood and Food Security	1	Pamana Ka Sa Pilipinas (Pamana) is a grassroots fisherfolk alliance of Philippine Marine Protected Areas with more than 6,000 individual fisherfolk and their 30,000 family members. Access to food, education, and health services for Philippine fisherfolk families is directly dependant upon the fish harvest and related health of the marine environment. Pamana represents a unique ecohealth strategy,…	1	https://doi.org/10.1007/s10393-010-0334-x
36	SDG1: No Poverty	Addressing poaching in marine protected areas through voluntary surveillance and enforcement	1	Poaching renders many of the world's marine protected areas ineffective. Because enforcement capacity is often limited, managers are attempting to bolster compliance by engaging the latent surveillance potential of fishers. However, little is known about how fishers respond when they witness poaching. Here, we surveyed 2,111 fishers living adjacent to 55 marine protected areas in seven countries …	1	https://doi.org/10.1038/s41893-018-0117-x
37	SDG1: No Poverty	Food, money and lobsters: Valuing ecosystem services to align environmental management with Sustainable Development Goals	1	With over 1 billion people currently relying on the services provided by marine ecosystems - e.g. food, fibre and coastal protection - governments, scientists and international bodies are searching for innovative research to support decision-makers in achieving the Sustainable Development Goals (SDGs). Valuing past and present ecosystem services allows investigation into how different scenarios i…	1	https://doi.org/10.1016/j.ecoser.2017.10.023
38	SDG1: No Poverty	Governance of Marine Protected Areas in East Africa: A Comparative Study of Mozambique, South Africa, and Tanzania	1	Marine protected areas (MPAs), including MPA networks, have become an indispensable tool for marine conservation. This article undertakes a comparative discussion of the domestic governance frameworks of Mozambique, South Africa, and Tanzania in view of the efforts of these three states to scale up their MPA cooperation in the East African Marine Ecoregion (EAME) to include MPA networks, includin…	1	https://doi.org/10.1080/00908320903285398
39	SDG1: No Poverty	Using the dina tool as governance of natural resources: lessons of Velondriake, southwestern Madagascar	1	In order to reduce conflict between national laws and local customs and social norms (known as dina), the government of Madagascar has progressively decentralised the governance of natural resources to local levels. Rules regarding resource use within contractual management transfers and co-managed protected areas are defined within dina, which can be legally recognised. In this paper we describe…	1	https://doi.org/10.1177/194008291000300409
40	SDG1: No Poverty	Cultural Models of the Coast in Australia: Toward Sustainability	0	Cultural models of the coast affect-and are affected by-our marine ethics, frameworks for coastal ownership, and management practices. The coast can be seen as an ecosystem with intrinsic values, a commodity that can be bought and sold, a community place where people meet, a landscape with aesthetic appeal, a productive system that generates profits, a property to be managed, or a spiritual realm…	0	https://doi.org/10.1080/08920750902855998
41	SDG1: No Poverty	Beyond band-aids in fisheries management: Fixing world fisheries	1	Although existing fisheries management systems have largely failed, the public and most scientists believe this failure is due to overfishing and that the solution includes the precautionary approach, marine protected areas, and ecosystem management. We argue that the existing interpretations of ecosystem management have proved disastrous for the U.S. West Coast groundfish fishery;, that no obvio…	1
42	SDG1: No Poverty	Bridging the divide: Social-ecological coherence in Marine Protected Area network design	0	1. Marine Protected Areas (MPAs) and networks of MPAs are being implemented globally as a spatial management tool for achieving conservation objectives. There has been considerable progress in reaching the prescribed 10% protected area target for 2020, outlined in the Convention on Biological Diversity Aichi Target 11 and the United Nations Sustainable Development Goal 14. 2. The application of M…	0	https://doi.org/10.1002/aqc.2885
43	SDG1: No Poverty	Management effectiveness evaluation of Bunaken National Park of Indonesia using an updated framework	0	Evaluation of management effectiveness is a very crucial aspect behind the management of every successful Marine Protected Area (MPA). It gives broader understanding of the management progress, how effective the management has been and what can be done to improve management performance. The paper evaluates the management effectiveness of Bunaken National Park (BNP) management performance from 200…	0	https://doi.org/10.4028/www.scientific.net/AMR.610-613.3180
44	SDG1: No Poverty	Adaptive Capacity of Fishing Communities at Marine Protected Areas: A Case Study from the Colombian Pacific	1	Departing from a theoretical methodology, we estimate empirically an index of adaptive capacity (IAC) of a fishing community to the establishment of marine protected areas (MPAs). We carried out household surveys, designed to obtain information for indicators and sub-indicators, and calculated the IAC. Moreover, we performed a sensitivity analysis to check for robustness of the results. Our findi…	1	https://doi.org/10.1007/s13280-013-0454-y
45	SDG1: No Poverty	Ocean zoning, first possession and Coasean contracts	1	Governments are being asked to integrate uses of ocean resources and space by developing comprehensive zoning plans. The current, sectoral practice establishes individual areas, such as marine protected areas, that satisfy constituents' first-possession strategies to claim de facto ownership, but the zones are not integrated. Also, the emphasis on exclusive-use zoning to minimize spillovers in bo…	1	https://doi.org/10.1016/j.marpol.2007.04.005
46	SDG1: No Poverty	Inter-local bay alliances in Northern Mindanao, Philippines: Experiences and lessons learned in establishment and organisational sustainability	1	Three alliances for bay management in Northern Mindanao region - Gingoog Bay Alliance, Macajalar Bay Development Alliance, and Iligan Bay Alliance in Misamis Occidental- were examined if critical legal, institutional, and financial factors to ensure organisational sustainability were present. Data were from key informant interviews and secondary sources. Results showed that the alliances have a c…	1	https://doi.org/10.1016/j.marpol.2018.05.001
47	SDG1: No Poverty	Response of rocky shore communities to anthropogenic pressures in Albania (Mediterranean Sea): Ecological status assessment through the CARLIT method	0	The lower mid-littoral and shallow subtidal communities were studied in the district of Vlora (Albania), three years after the establishment of a Marine Protected Area, with particular attention to the long-lived species. The bioconstructions built in the mid-littoral zone by the calcified rhodobiont Lithophyllum byssoides were in poor condition and sometimes even dead. In contrast, the brown alg…	0	https://doi.org/10.1016/j.marpolbul.2016.05.041
48	SDG1: No Poverty	Size matters: Predator outbreaks threaten foundation species in small Marine Protected Areas	0	The unanticipated impacts of consumers in fragmented habitats are frequently a challenge for ecosystem management. On Indo-Pacific coral reefs, crown-of-thorns sea stars (Acanthaster spp.) are coral predators whose outbreaks cause precipitous coral decline. Across large spatial scales, Acanthaster densities are lower in large no-take Marine Protected Areas (MPAs) and reefs subject to limited huma…	0	https://doi.org/10.1371/journal.pone.0171569
49	SDG1: No Poverty	Socio-economic aspects of boat-based ecotourism during the sardine run within the Pondoland Marine Protected Area, South Africa	0	Understanding recreational aspects of the tourism industry developing around the KwaZulu-Natal sardine run is important for the protection and sustainability of the Pondoland Marine Protected Area (MPA), on the south-east coast of South Africa. Between June and July 2007, a total of 128 people visited this area to experience the sardine run using boat-based access. An onsite questionnaire survey …	0	https://doi.org/10.2989/1814232X.2010.502642
50	SDG1: No Poverty	Habitat modeling of Irrawaddy dolphins (Orcaella brevirostris) in the Eastern Gulf of Thailand	0	Aim The Irrawaddy dolphin (Orcaella brevirostris) is an endangered cetacean found throughout Southeast Asia. The main threat to this species is human encroachment, led by entanglement in fishing gear. Information on this data-poor species' ecology and habitat use is needed to effectively inform spatial management. Location We investigated the habitat of a previously unstudied group of Irrawaddy d…	0	https://doi.org/10.1002/ece3.6023
51	SDG1: No Poverty	Indonesian coral reefs - An economic of a precious but threatened resource	1	Indonesia's coral reefs are currently undergoing rapid destruction from human activities including: poison fishing; blast fishing; coral mining; sedimentation; pollution and overfishing. In this paper, these destructive activities are described and the private gains from these activities accruing to individuals are compared with the associated costs to society. It is shown that the social costs b…	1
52	SDG1: No Poverty	Determining the Feasibility of Establishing New Multiple-Use Marine Protected Areas in Chile	1	This paper evaluates the feasibility of establishing a multiple-use marine protected area. The methodology was applied to evaluate three proposed sites in Chile with diverse conservation needs, social stress and poverty levels, and different economic activities (small-scale fishing, heavy industry, and mining activities). We use two broad categories for the evaluation: socio-economic and politica…	1	https://doi.org/10.1007/s13280-013-0455-x
53	SDG1: No Poverty	Poverty and the use of destructive fishing gear near east African marine protected areas	1	Poverty may be an important influence on the exploitation of marine resources in tropical developing countries. A number of studies have hypothesized that destructive fishing gears, which can degrade habitat, capture high proportions of juvenile fish and ultimately lead to reduced yields, are primarily used by the poorer segments of society. However, few studies have empirically tested this relat…	1	https://doi.org/10.1017/S0376892910000123
54	SDG1: No Poverty	Marine Conservation Begins at Home: How a Local Community and Protection of a Small Bay Sent Waves of Change Around the UK and Beyond	1	The Firth of Clyde, on the west coast of Scotland, was once one of the most productive fishing grounds in Europe. However, successive decades of poor management and overfishing led to a dramatic loss of biodiversity and the collapse of finfish fisheries. In response, concerned local residents on the Isle of Arran, which lies in the middle of the Clyde, formed the Community of Arran Seabed Trust (…	1	https://doi.org/10.3389/fmars.2020.00076		Not relevant to poverty
55	SDG1: No Poverty	Marine protected areas and resilience to sedimentation in the Solomon Islands	1	The ability of marine protected areas (MPAs) to provide protection from indirect stressors, via increased resilience afforded by decreased impact from direct stressors, remains an important and unresolved question about the role MPAs can play in broader conservation and resource management goals. Over a five-year period, we evaluated coral and fish community responses inside and outside three MPA…	1	https://doi.org/10.1007/s00338-012-0981-1		Not relevant to poverty
56	SDG1: No Poverty	What to do when you have almost nothing: A simple quantitative prescription for managing extremely data-poor fisheries	1	The cost, complexity and the lack of technical capacity in many countries have made the scientific assessment and sustainable management of data-poor fisheries a persistent problem. New and innovative approaches are needed to stop the ongoing decline of data-poor fisheries and loss of coastal biodiversity they are driving. In recent decades, marine protected areas have become the most preferred f…	1	https://doi.org/10.1111/faf.12335		Not relevant to poverty
57	SDG1: No Poverty	Assessing legacy contaminants in sediments from marine protected areas of the central coast of Sao Paulo (Brazil)	0	The presence of legacy contaminants in sediments from three Marine Protected Areas (MPAs) of the coast of Sao Paulo State was evaluated. Four sampling surveys were conducted between 2013 and 2015 in 10 sites, distributed along the Laje de Santos Marine and Xixova-Japui State Parks (PEMLS and XJSP, respectively) and Central Coast Marine Protection Area (APAMLC). Samples were analyzed for sediment …	0	https://doi.org/10.1590/S1679-87592017128806504
58	SDG1: No Poverty	Public perceptions of marine threats and protection from around the world	0	The ocean is increasingly facing direct and indirect threats from multiple human activities that alter marine ecosystems worldwide. Mitigating these threats requires a global shift in the way people perceive and interact with the marine environment. Marine public perceptions research has emerged as a useful tool to understand public awareness and attitudes towards the sea. This study compares ava…	0	https://doi.org/10.1016/j.ocecoaman.2017.11.004
59	SDG1: No Poverty	Socio-economic aspects of the tiger shark diving industry within the Aliwal Shoal Marine Protected Area, South Africa	0	Understanding socio-economic aspects of the tiger shark Galeocerdo cuvier diving industry, including information on participant expectations, experiences and expenditure, is necessary for the effective management of the Aliwal Shoal Marine Protected Area on the east coast of South Africa. Between January and December 2007, a total of 2 133 tiger shark dives was conducted by 1 065 divers (95% CI =…	0	https://doi.org/10.2989/AJMS.2009.31.2.10.882
60	SDG1: No Poverty	POSTMORTEM FINDINGS IN CETACEANS FOUND STRANDED IN THE PELAGOS SANCTUARY, ITALY, 2007-14	0	Between 2007 and 2014, 83 cetaceans were found stranded along the Ligurian coast of Italy, in the Pelagos Sanctuary, the largest marine protected area in the Mediterranean basin. Forty-nine (59%) were submitted to complete or partial necropsy, depending on the conservation status of the carcass. Based on gross and histological pathology and ancillary testing, the cause of death was determined and…	0	https://doi.org/10.7589/2016-07-150
61	SDG1: No Poverty	Diving user fees and the financial sustainability of marine protected areas: Opportunities and impediments	0	Marine Protected Areas (MPAs) worldwide are reported as failing to achieve their conservation objectives due to insufficient funds, resulting in management shortfalls such as inadequate law enforcement and poor visitor management. The implementation of user fee systems has been suggested as a solution to the financial unsustainability of MPAs, with divers commonly willing to pay large sums of mon…	0	https://doi.org/10.1016/j.ocecoaman.2006.02.003
62	SDG1: No Poverty	Impacts of the Moreton Bay Marine Park rezoning on commercial fishermen	0	The design of marine protected areas now typically incorporates socioeconomic data to minimize potential negative impacts on stakeholders. However, these data have limitations that are not well understood. Furthermore, whether the application of socioeconomic data in planning actually reduces avoidable negative impacts on stakeholders is rarely evaluated. This study assessed impacts on commercial…	0	https://doi.org/10.1016/j.marpol.2012.11.006
63	SDG1: No Poverty	Socio-cultural context of fishers' participation in coastal resources management in Anini-y, Antique in west central Philippines	1	The vicious cycle of poverty, overfishing and resource degradation in coastal communities in the Philippines calls for action that will address the problem of declining fish catch and degraded fish habitats. The literature has shown that an efficient and effective coastal management program can be instrumental in approaching this problem. In order to secure food and livelihood of fishers, the Sou…	1	https://doi.org/10.1016/j.fishres.2010.10.014
64	SDG1: No Poverty	Fisheries rent creation and distribution-the imaginary case of Codland	0	This paper discusses actual and possible achievements and failures of Codland and examines it from the point of view of efficiency and in terms of distribution. Joint analysis of the two approaches is needed when contemplating fisheries management reforms, since such reforms may create both winners and losers. The analysis demonstrates how rent drain from fishing communities and countries may occ…	0	https://doi.org/10.1016/j.marpol.2010.05.004
65	SDG1: No Poverty	Conserving Poverty: Destructive Fishing Gear Use in a Tanzanian Marine Protected Area	1	Drawing from ethnographic fieldwork, this paper attends to the persistent use of Destructive Fishing Gear (DFG) in a Marine Protected Area (MPA) in southeastern Tanzania. Based on participant observation, document analysis, in-depth interviews and focus group discussions conducted with villagers, I argue that the MPA has failed to eliminate the use of DFG because of its inability to address the h…	1	https://doi.org/10.4103/cs.cs_18_53
66	SDG1: No Poverty	A socioeconomic perspective of environmental degradation at Kepulauan Seribu Marine National Park, Indonesia	1	Kepulauan Seribu was designated as a marine protected area to promote and protect a healthy marine ecosystem and its biodiversity. However, despite numerous efforts to protect the area, the park continues to be impacted by both external and internal factors. External factors include domestic sewage, vessel traffic, industrial effluent, and urban run-off from metropolitan Jakarta. Meanwhile, inter…	1	https://doi.org/10.1080/089207502753504698
67	SDG1: No Poverty	Occurrence of juvenile bull sharks (Carcharhinus leucas) in the Navua River in Fiji	0	Effective species conservation requires the protection of all stages of its life-cycle. The Shark Reef Marine Reserve (SRMR) in Fiji is a marine protected area where large numbers of adult bull sharks (Carcharhinus leucas) congregate due to food provisioning. At the end of a calendar year bull sharks leave the area for reproductive activity, but parturition sites are still unknown. Between Februa…	0	https://doi.org/10.1071/MF16005
68	SDG1: No Poverty	Do managers and stakeholders have congruent perceptions on marine protected area management effectiveness?	0	The assessment of management effectiveness is essential to measure how well marine protected areas (MPAs) are achieving their goals and objectives. Incorporating the view of multiple stakeholders is an important component of MPA planning and management as it may simultaneously help reduce conflicts and increase adherence to rules and compliance. However, the most assessments of MPA management eff…	0	https://doi.org/10.1016/j.ocecoaman.2019.104865
69	SDG1: No Poverty	Marine protected areas: Science, policy & management	1	Marine protected areas (MPAs) generate powerful interactions between social, economic and environmental interests, manifest at a circumscribed and often local scale. Consequently the designation and management of an individual MPA typically plays out in microcosm the general challenge of sustainable development in the marine environment. Some universally relevant questions relating to four common…	1	https://doi.org/10.1016/j.ecss.2018.10.014
70	SDG1: No Poverty	Determinants of Caulerpa racemosa distribution in the north-western Mediterranean	0	Predicting community susceptibility to invasion has become a priority for preserving biodiversity. We tested the hypothesis that the occurrence and abundance of the seaweed Caulerpa racemosa in the north-western (NW) Mediterranean would increase with increasing levels of human disturbance. Data from a survey encompassing areas subjected to different human influences (i.e. from urbanized to protec…	0	https://doi.org/10.3354/meps09137
71	SDG1: No Poverty	Bias in evaluating the effects of marine protected areas: the importance of baseline data for the Galapagos Marine Reserve	0	Analysis of ecological baseline data collected for key resource species within the Galapagos Marine Reserve indicates that variation in animal density associated with the location of fully protected zones can be comparable to protected area effects. Even with a high level of interspersion between conservation, tourism and fishing management zones, major differences in densities of economically im…	0	https://doi.org/10.1017/S0376892904001584
72	SDG1: No Poverty	Utilizing Fishermen Knowledge and Expertise: Keys to Success for Collaborative Fisheries Research	0	Collaborative fisheries research provides a mechanism for integrating the unique knowledge, experience, and skills of fishermen and scientists. It is a joint intellectual endeavor that begins with the inception of a project and continues until its final stages, with each group having mutual investment in-and ownership of-the project. Collaborative fisheries research promotes communication and tru…	0	https://doi.org/10.1080/03632415.2011.633467
73	SDG1: No Poverty	The Lawless Sea? Policy Options for Voluntary Compliance Regimes in Offshore Resource Zones in the Pacific	0	Pacific open ocean fisheries are classic examples of the tragedy of the commons where a lack of defined ownership results in competitive overexploitation by multiple parties. Such circumstances exist over most Pacific seas beyond site of land due to scarce monitoring resources. Voluntary conservation regimes are not working, as fisheries decline substantially. The Pacific has diverse management r…	0	https://doi.org/10.1002/app5.28
74	SDG1: No Poverty	Understanding social knowledge, attitudes and perceptions towards marine biodiversity: The case of tegnite in Italy	0	The global decline of marine ecosystems may be partially ascribed to poor governance and to the lack of sustainable use and marine biodiversity conservation policy. Conservation success is strongly related to how people perceive marine biodiversity and those perceptions can change as a result of the accumulation of knowledge, the quality of the environment, and the appropriate and sustainable man…	0	https://doi.org/10.1016/j.ocecoaman.2017.02.019
75	SDG1: No Poverty	Analysis of marine protected area management: The Marine Park of the Azores (Portugal)	0	A significant number of declared marine protected areas (MPAs) lack management plans, or they are not being applied appropriately, leading to poor management and, in the worst case scenario, so-called paper parks. Evaluating the management of an MPA helps detect strengths and weaknesses, make decisions and correct mistakes in the future. Unfortunately, few evaluations have been done. In recent de…	0	https://doi.org/10.1016/j.marpol.2020.104104
76	SDG1: No Poverty	Source-sink population dynamics and the problem of siting marine reserves	0	Marine protected areas (MPAs) have been proposed as one way to reduce the problems of overfishing and to respond to uncertainty in fisheries management, Many fisheries, including tropical and temperate reef fisheries, are inherently multispecies, multigear fisheries and are difficult to manage by traditional methods. Clearly, these fisheries should benefit fi om the establishment of no-take marin…	0
77	SDG1: No Poverty	The challenge of assessing whether the OSPAR network of marine protected areas is ecologically coherent	0	As MPA networks continue to grow worldwide, decision makers and the public will need to be kept informed regarding progress made in meeting the underlying ecological goals of the networks. The twelve coastal European nations of the OSPAR Commission have agreed to establish within the waters of the Northeast Atlantic an ecologically coherent network of marine protected areas by 2010. An initial se…	0	https://doi.org/10.1007/s10750-008-9348-6
78	SDG1: No Poverty	Social-ecological Changes, Livelihoods and Resilience Among Fishing Communities in Mafia Island Marine Park, Tanzania	1	Analysis of societal dimensions is increasingly receiving attention in socialecological resilience research. This study investigates the impacts of neo-liberal marine conservation and economic policies, and environmental changes on the livelihoods of two fishing communities in Mafia Island Marine Park, Tanzania, and their response strategies towards attempting to maintain livelihood resilience. T…	1	https://doi.org/10.1080/08039410.2015.1065906
79	SDG1: No Poverty	Analysis of Progress Towards a Comprehensive System of Marine Protected Areas in Brazil	0	Brazilian marine ecosystems face great threats while retaining outstanding biological features. A gap analysis was conducted to evaluate how well marine protected areas (MPAs) in Brazil meet conservation objectives for representation, connectivity, and risk-spreading. The performance of the MPAs was evaluated by overlaying maps of ecosystem and management and calculating the size of no-take areas…	0	https://doi.org/10.4322/natcon.2013.013
80	SDG1: No Poverty	Marine protected areas in India	0	India has large coastal wetlands which cover an area of over 40,230 km(2). Among various types of marine ecosystems, tidal mudflats, mangroves, estuaries, lagoons, beaches, marshes, vegetated wetlands and coral reefs have a major share. A total of 97 major estuaries, 34 major lagoons, 31 mangroves areas and 5 coral reef areas have been mapped and identified in India for conservation and sustainab…	0
81	SDG1: No Poverty	First survey of fishes in the Betty's Bay Marine Protected Area along South Africa's temperate south-west coast	0	This first survey of fish in the Betty's Bay Marine Protected Area (MPA), on the south coast of South Africa, was conducted using baited remote underwater video systems (BRUVs). A total of 58 deployments recorded 42 species in 20km(2), including reef, kelp and sand habitats in protected and exploited zones, at between 5 and 40m depth. Chondrichthyans accounted for 28% of diversity. Teleost divers…	0	https://doi.org/10.2989/1814232X.2015.1110045
82	SDG1: No Poverty	Policy misfits, climate change and cross-scale vulnerability in coastal Africa: how development projects undermine resilience	1	Coastal social ecological systems in eastern Africa are subject to a range of environmental, social and economic changes. They are already vulnerable to these multiple stressors, and the impacts of climate change are likely to further exacerbate their vulnerabilities. Some of these impacts may be observed and experienced already. The analysis presented in this paper is based on mixed methods empi…	1	https://doi.org/10.1016/j.envsci.2010.06.003
83	SDG1: No Poverty	MEETING ECOLOGICAL AND ECONOMIC GOALS - MARINE PARKS IN THE CARIBBEAN	1	Marine parks are increasingly being established to protect endangered marine ecosystems and the biological diversity that they support. Trade-offs exist between protection and use, however, and ways must be found to produce economic benefits from marine areas while still yielding protection benefits, a question of particular importance to poorer countries that can ill afford to forego development…	1
84	SDG1: No Poverty	Consideration of customary marine tenure system in the establishment of marine protected areas in the South Pacific	1	The biodiversity of the South Pacific region is of global importance. Changes accompanying economic development have undermined the Pacific's traditional social systems, including their capacity for resource management, and the environment has suffered as a result. The South Pacific's social and land/marine tenure systems require local ownership involvements and management. Centralized administra…	1	https://doi.org/10.1016/S0964-5691(98)00017-9		this is talking about mpas as an idea, not evaluating a case study
85	SDG1: No Poverty	Bonefish (Albula vulpes) home range to spawning site linkages support a marine protected area designation	0	1. A spatial approach to coastal management, such as marine protected areas, is being increasingly used to address biodiversity and fishery declines resulting from habitat loss, degradation, and overfishing. This approach is especially applicable in regions and fisheries that are data poor, and which often lack regulations and adequate capacity for enforcement. In data-poor situations, species th…	0	https://doi.org/10.1002/aqc.3534
86	SDG1: No Poverty	Multiscale determinants of social adaptive capacity in small-scale fishing communities	1	Climate change is expected to reinforce undesirable social and ecological feedbacks between ecosystem degradation and poverty. This is particularly true for resource-dependent communities in the developing world such as coral reef fishing communities who will have to adapt to those new environmental conditions and novel ecosystems. It is therefore crucial to identify: i) multiscale characteristic…	1	https://doi.org/10.1016/j.envsci.2020.03.006
87	SDG1: No Poverty	Fisheries, tourism, and marine protected areas: Conflicting or synergistic interactions?	0	Most coastal degradation has been caused by anthropogenic actions, threatening the ecosystem services (ESs) humans depend on. Marine protected areas are a solution to protect ESs, such as fish stocks, although this could potentially lead to conflicts with fisheries and tourism. We investigated how fisheries and tourism in the SE Brazil interact with conservation, evaluating their potential for sy…	0	https://doi.org/10.1016/j.ecoser.2014.12.003		Discusses the benefits of activities outside MPAs
88	SDG1: No Poverty	A clash of values and approaches: A case study of marine protected area planning in Mozambique	1	Many developing countries are expanding their network of Marine Protected Areas (MPAs) to meet ambitious marine conservation targets set globally and to develop tourism nationally. This study explores the human dimensions of MPA planning in Mozambique by engaging local resource users in a series of structured discussions about marine resource use, pressures on marine resources, ways to address su…	1	https://doi.org/10.1016/j.ocecoaman.2010.10.009
89	SDG1: No Poverty	INVESTIGATOR GROUP EXPEDITION 2006: APPLICATION OF REMOTE SURVEY TECHNIQUES TO CHARACTERISE THE BENTHIC HABITATS	0	As part of the 2006 Investigator islands scientific expedition, a mapping survey was carried out to improve what was known about the spatial extent and composition of subtidal benthic habitats surrounding Flinders and Pearson Islands in the Investigator group of South Australia's west coast. Habitats in the Investigator group are relatively pristine and diverse, and as such have unique conservati…	0	https://doi.org/10.1080/03721426.2008.10887104
90	SDG1: No Poverty	Enhanced numbers of two temperate reef fishes in a small, partial-take marine protected area related to spearfisher exclusion	0	Reviews of global studies suggest that even small no-take marine protected areas (MPAs) can have localized benefits on harvested organisms of varying mobility. The generality of this conclusion, however, has been questioned due to poor experimental designs of some studies included in reviews, and the relatively small proportion of studies which focused on very small MPAs (<= 1 km(2)). Here we use…	0	https://doi.org/10.1016/j.biocon.2013.07.031
91	SDG1: No Poverty	A Management Strategy for Sedentary Nearshore Species that Uses Marine Protected Areas as a Reference	0	Classical approaches to fisheries stock assessment rely on methods that are not conducive to managing data-poor stocks. Moreover, many nearshore rocky reef species exhibit spatial variation in harvest pressure and demographic rates, further limiting traditional stock assessment approaches. Novel management strategies to overcome data limitations and account for spatial variability are needed. Wit…	0	https://doi.org/10.1577/C08-026.1
92	SDG1: No Poverty	Community involvement in marine protected areas: The case of Puerto Morelos reef, Mexico	0	The case of Puerto Morelos reef marine protected area (MPA) provides an example of a community-based marine conservation initiative to protect it coral reef ecosystem. The establishment and maintenance of this MPA had five stages: (a) identification of community leaders who would participate in the project; (b) generation of consensus On the need to protect the reef through discussions among loca…	0	https://doi.org/10.1016/j.jenvman.2007.06.008
93	SDG1: No Poverty	Large-scale spatial patterns within soft-bottom epibenthic invertebrate assemblages along the west coast of South Africa, based on the Nansen trawl survey	0	Knowledge of benthic invertebrate biodiversity and distribution patterns over the continental shelf of South Africa is poor and this is hampering efforts to design a network of marine protected areas aimed at conserving regional benthic biota. We analysed invertebrate biodiversity patterns within the offshore benthos along the west coast of South Africa, and 103 species, representing 9 phyla and …	0	https://doi.org/10.2989/1814232X.2014.894943
94	SDG1: No Poverty	Convergence of a Disease and Litigation Leading to Increased Scallop Discard Mortality and Economic Loss in the Georges Bank Fishery	0	Rotational management in the Atlantic sea scallop Placopecten magellanicus fishery has focused on closing areas to fishing when a high proportion of small scallops is observed in a discrete area, but less attention has been paid to reopening closed areas to prevent poor meat quality. In this fishery there are several large marine protected areas, including Closed Area I of Georges Bank. Intense d…	0	https://doi.org/10.1002/nafm.10268
95	SDG1: No Poverty	Tracking the changes of a fish community following a megascale reclamation and ensuing mitigation measures	0	A fish community in Hong Kong that had experienced megascale reclamation in Chek Lap Kok International Airport, and the ensuing marine protected areas (MPAs) establishment was tracked for 12 years. Significant shifts in community structure, typified by 17 species, were revealed by multivariate analyses and community metrics. Dynamic factor analysis disclosed two underlying common trends among the…	0	https://doi.org/10.1093/icesjms/fst046
96	SDG1: No Poverty	Estimating marine protected area network benefits for reef sharks	0	Animal movement has direct applications in spatial management and conservation planning, yet it is rarely taken into account for the design of natural protected areas. For instance, reef shark species are thought to benefit from marine protected area networks, even though their movement behaviour remains poorly characterized. Poor understanding of species' movements implies that the benefits of M…	0	https://doi.org/10.1111/1365-2664.13706
97	SDG1: No Poverty	Large-scale conservation planning in a multinational marine environment: cost matters	0	Explicitly including cost in marine conservation planning is essential for achieving feasible and efficient conservation outcomes. Yet, spatial priorities for marine conservation are still often based solely on biodiversity hotspots, species richness, and/or cumulative threat maps. This study aims to provide an approach for including cost when planning large-scale Marine Protected Area (MPA) netw…	0	https://doi.org/10.1890/13-1249.1
98	SDG1: No Poverty	Quantifying connectivity in the coastal ocean with application to the Southern California Bight	0	The quantification of coastal connectivity is important for a wide range of real-world applications ranging from assessment of pollutant risk to nearshore fisheries management. For these purposes, coastal connectivity can be defined as the probability that water parcels from one location have advected to another site over a given time interval. Here we demonstrate how to quantify connectivity usi…	0	https://doi.org/10.1029/2008JC005166
99	SDG1: No Poverty	A Systematic Review of the Socioeconomic Factors that Influence How Marine Protected Areas Impact on Ecosystems and Livelihoods	1	Marine protected areas (MPAs) are among the most widely accepted methods of marine management. MPAs are not, however, always placed such that they can maximize impact on conservation and livelihoods. Current MPA guidelines fall short in focusing primarily on biophysical criteria, overlooking interrelated socioeconomic factors. We identified 32 socioeconomic factors that influence whether MPA plac…	1	https://doi.org/10.1080/08941920.2018.1489568		this paper seems highly relevant but does not elude to a specific goal/target
100	SDG1: No Poverty	A tool for site prioritisation of marine protected areas under data poor conditions	0	A challenge of managing data poor fisheries lies in overcoming uncertainties associated with a lack of information on biological and socio-economic conditions. This paper focuses on site prioritisation for marine protected areas, a process that usually imposes moderate to heavy demands on data, time, local expertise, and funds. A fuzzy logic decision support tool for zoning marine areas that is s…	0	https://doi.org/10.1016/j.marpol.2012.04.010
101	SDG1: No Poverty	Reconciling the needs of fisheries and conservation in coral reefs	1	Coral reef fish stocks and their habitats are frequently subject to heavy exploitation and fishing activity. At the same time, increasing nonextractive use such as tourism and the protection of ecological services demand increased reef conservation efforts. Failure to reconcile the needs of fisheries and conservation on coral reefs through conventional management has resulted in two trends. The f…	1
102	SDG1: No Poverty	Assessing the social and economic impact of small scale fisheries management measures in a marine protected area with limited data	0	The European Union requires that major legislative actions undergo an impact assessment (IA), but this methodology is often not adapted to policy measures in complex situations, as the coexistence of marine protected areas and small scale fisheries. The appropriateness of the IA methodology currently in use is tested on the example of a small scale fishery in a protected area in the German coast …	0	https://doi.org/10.1016/j.marpol.2017.10.039
103	SDG1: No Poverty	Applying complementary species vulnerability assessments to improve conservation strategies in the Galapagos Marine Reserve	0	Marine biodiversity can be protected by identifying vulnerable species and creating marine protected areas (MPAs) to ensure their survival. A wide variety of methods are employed by environmental managers to determine areas of conservation priority, however which methods should be applied is often a subject of debate for practitioners and scientists. We applied two species vulnerability assessmen…	0	https://doi.org/10.1007/s10531-014-0679-5
104	SDG1: No Poverty	Utility of primary scientific literature to environmental managers: An international case study on coral-dominated marine protected areas	0	The integration of scientific information into the decision-making process for the management of marine resources remains a significant challenge, with the inaccessibility of primary scientific literature to environmental practitioners identified as a key limiting factor. Here, we quantify the use of primary scientific literature in environmental management plans, and explore potential barriers t…	0	https://doi.org/10.1016/j.ocecoaman.2014.09.003
105	SDG1: No Poverty	Food supply depends on seagrass meadows in the coral triangle	1	The tropical seascape provides food and livelihoods to hundreds of millions of people, but the support of key habitats to this supply remains ill appreciated. For fisheries and conservation management actions to help promote resilient ecosystems, sustainable livelihoods, and food supply, knowledge is required about the habitats that help support fisheries productivity and the consequences of this…	1	https://doi.org/10.1088/1748-9326/9/9/094005
106	SDG1: No Poverty	Community-based management fails to halt declines of bumphead parrotfish and humphead wrasse in Roviana Lagoon, Solomon Islands	0	Community-based fisheries management that integrates local knowledge and existing user rights is often seen as a solution to the failures of top-down fisheries management in the Pacific. In Roviana Lagoon, Western Solomon Islands, a network of community-based marine protected areas (MPAs) was established in the early 2000s to conserve declining populations of bumphead parrotfish (Bolbometopon mur…	0	https://doi.org/10.1007/s00338-019-01801-z
107	SDG1: No Poverty	Biodiversity, coastal protection and resource endowment: Policy options for improving ocean health	1	The paper develops a production function for the Global Ocean Health Index (OHI) for 2013. Data from the Ocean Health Statistics, plus from the Human Development Index (HDI) for 151 countries are used. We employ two-stage regression model to conduct this evaluation. The Tobit model, used to obtain the estimated dependent variable, results show Coastal Protection, Livelihoods and Economies, Touris…	1	https://doi.org/10.1016/j.jpolmod.2018.02.002
108	SDG1: No Poverty	Molecular Identification and Genetic Diversity of Acropora hyacinthus from Boo and Deer Island, Raja Ampat, West Papua	0	Indonesia lies at the centre of biodiversity for corals. However, the reefs suffered from extensive human exploitation. Marine Protected Areas is thought to be best solution to protect coral reefs ecosystem. Understanding genetic diversity is crucial for effective management of the MPAs, however genetic diversity is rarely been corporate in designing an MPA. Moreover, many MPAs are uneffectively …	0	https://doi.org/10.1088/1755-1315/116/1/012065
109	SDG1: No Poverty	Human dimensions of marine protected areas and small-scale fisheries management: A review of the interpretations	0	Scientists and managers increasingly recognize the need to address the human dimensions (HD) of planning and managing marine systems, but it remains unclear what these dimensions entail. This paper presents an analysis of the state of the art of interpretations and uses of the term HD in the context of marine protected areas (MPA) and small-scale fisheries (SSF). Based on previously established d…	0	https://doi.org/10.1016/j.marpol.2020.104040
110	SDG1: No Poverty	Governance analysis of a community managed small-scale crab fishery in Madagascar: novel use of an empirical framework	1	The Marine Protected Area Governance (MPAG) framework was developed to offer a structured, empirical approach for analysing governance and has been applied to marine protected areas (MPAs) around the world. This study sees the novel application of the MPAG framework to a small-scale mangrove crab fishery in northwest Madagascar. The country typifies developing country environmental governance cha…	1	https://doi.org/10.1016/j.marpol.2017.11.022
111	SDG1: No Poverty	Integrated coastal management and marine protected areas: Complementarity in the Philippines	1	Small marine protected areas (MPAs) were established in the Philippines as early as 1974. These models set forth a framework for coral reef management that has been shown to enhance fish yields to traditional fishers as well as protect and maintain near-shore coral reef habitats for biodiversity and multiple economic uses. The history of MPAs is described in relation to the evolution of integrate…	1	https://doi.org/10.1016/j.ocecoaman.2005.03.006
112	SDG1: No Poverty	Rapid assessment of risks to a mobile marine mammal in an ecosystem-scale marine protected area	0	Ecosystem-scale networks of marine protected areas (MPAs) are important conservation tools, but their effectiveness is difficult to quantify in a time frame appropriate to species conservation because of uncertainties in the data available. The dugong (Dugong dugon) is a mobile marine species that occurs in shallow inshore waters of an ecosystem-scale network of MPAs (the Great Barrier Reef World…	0	https://doi.org/10.1111/j.1523-1739.2008.00923.x
113	SDG1: No Poverty	A governance analysis of Soufriere Marine Management Area, Saint Lucia: Previously effective but increasingly challenged by driving forces	1	This paper employs the Marine Protected Area Governance (MPAG) analysis framework to explore the effectiveness of governance of Soufriere Marine Management Area (SMMA), Saint Lucia in fulfilling its objectives. The SMMA has been established for 22 years and although initially heralded as a success at resolving user conflicts and conserving biodiversity, drivers and conflicts in the area have sinc…	1	https://doi.org/10.1016/j.marpol.2020.104220
114	SDG1: No Poverty	Scientific Criteria for Conservation and Sustainable Usage of Marine Biodiversity in Canada's Oceans	0	The Canadian Healthy Oceans Network is a new national marine science initiative that is uniting researchers to provide scientific guidelines for policy in conservation and sustainable use of marine biodiversity resources in Canada's three oceans. Theme Marine Biodiversity is addressing how patterns of biological biodiversity are related to habitat diversity. Specifically, we are testing hypothese…	0
115	SDG1: No Poverty	Status, Institutions, and Prospects for Global Capture Fisheries	1	We compile global data to examine the current status, trends, threats, and opportunities in the world's wild-capture fisheries. We find that global fisheries have largely diverged-well-managed, often industrial fisheries tend to be in reasonably good health, while coastal fisheries, often from low-governance regions, tend to be in poor health. Good governance seems to play a central role, and we …	1	https://doi.org/10.1146/annurev-environ-101718-033310
116	SDG1: No Poverty	Marine protected areas in sri lanka: A review	1	Despite the popularity of marine protected areas (MPAs) as a management tool, increasing evidence shows that many fail to achieve conservation objectives. Although several MPAs exist in Sri Lanka, most are not managed, and resource extraction and habitat degradation continue unabated. At present, the declaration and management of MPAs is carried out without adequate consideration of the ecology, …	1	https://doi.org/10.1007/s00267-005-0154-x
117	SDG1: No Poverty	Allies, not aliens: increasing the role of local communities in marine protected area implementation	1	Various management approaches have been proposed to address the alarming depletion of marine coastal resources. Prominent among them are community-based management and the establishment of marine protected areas (MPAs). The overall poor performance of MPAs can be traced to a failure to effectively include local communities in the design and implementation of relevant measures. Recent efforts have…	1	https://doi.org/10.1017/S0376892910000172
118	SDG1: No Poverty	Management of the Kenyan coast	1	We describe the changes in the management of marine resources in Kenya from traditional management, through the era of marine protected areas and the fisheries sector, towards the initial developments of an integrated coastal area management system, which has only been active since the early 1990s. The first meetings between sectors were held in the mid-1990s where the responsibilities of managem…	1	https://doi.org/10.1016/j.ocecoaman.2005.03.005
119	SDG1: No Poverty	Using a spatially structured model to assess the Tasmanian fishery for banded morwong (Cheilodactylus spectabilis)	0	Fisheries can be regarded as data poor if insufficient information is available to produce a defensible stock assessment. Data-limited fisheries can be (1) new fisheries with no time-series of information; (2) low-value fisheries for which little data are collected; (3) bycatch fisheries, which are often ignored; and (4) spatially structured fisheries where data collected may not be representativ…	0
120	SDG1: No Poverty	How Are Our MPAs Doing? Challenges in Assessing Global Patterns in Marine Protected Area Performance	1	Without effective management, protected areas are unlikely to achieve the high expectations the conservation and development sectors have for them: conserving biodiversity and alleviating poverty. Numerous marine protected area (MPA) assessment initiatives have been developed at various spatial and temporal scales, including the guidebook How is your MPA doing? These management assessments have b…	1	https://doi.org/10.1080/08920753.2014.904178
121	SDG1: No Poverty	Distribution, sources and consequences of nutrients, persistent organic pollutants, metals and microplastics in South American estuaries	0	Estuarine pollution imposes rapid, increasing and lasting environmental modifications. In the present review, especial attention is given to estuaries in South America (SA), where legislation, policies and actions to guarantee environmental quality remain ineffective. There, the majority of estuaries face uncontrolled occupation of its margins by urban and industrial centres, agriculture and aqua…	0	https://doi.org/10.1016/j.scitotenv.2018.09.276
122	SDG1: No Poverty	Contrasting phylogeography in three endemic Hawaiian limpets (Cellana spp.) with similar life histories	0	The marine environment offers few obvious barriers to dispersal for broadcast-spawning species, yet population genetic structure can occur on a scale much smaller than the theoretical limits of larval dispersal. Comparative phylogeographical studies of sympatric sister species can illuminate how differences in life history, behaviour, and habitat affinity influence population partitioning. Here w…	0	https://doi.org/10.1111/j.1365-294X.2007.03385.x
123	SDG1: No Poverty	MPA in Labor: Securing the Pearl Cays of Nicaragua	1	Implementation of Marine Protected Areas (MPAs) has always a step-zero, i.e., an initial phase when the idea is incepted, communicated and negotiated among stakeholders. What happens during this phase is likely to have an impact later on. If not done right, the management of the MPA may encounter problems at later stage that will be difficult to correct. Inspired by this working theory, this arti…	1	https://doi.org/10.1007/s00267-010-9587-y
124	SDG1: No Poverty	The role of stakeholder perceptions and institutions for marine reserve efficacy in the Midriff Islands Region, Gulf of California, Mexico	1	Governance of marine resources underscores the role of social, economic, and political objectives in achieving conservation outcomes. Marine protected areas, specifically no-take areas (NTAs) where all extractive uses are prohibited, are now widely-used to promote sustainable fisheries and protect marine biodiversity. However, no take areas have had mixed success, and the governance structures th…	1	https://doi.org/10.1016/j.ocecoaman.2018.01.024
125	SDG1: No Poverty	A typology of fisheries management tools: using experience to catalyse greater success	1	Fisheries provide nutrition and livelihoods for coastal populations, but many fisheries are fully or over-exploited and we lack an approach for analysing which factors affect management tool performance. We conducted a literature review of 390 studies to assess how fisheries characteristics affected management tool performance across both small-scale and large-scale fisheries. We defined success …	1	https://doi.org/10.1111/faf.12192
126	SDG1: No Poverty	Coral reef health and management on the verge of a tourism boom: A case study from Miches, Dominican Republic	1	The Miches Municipality lies in the second poorest province in the Dominican Republic, and its inhabitants rely heavily on nearby coral reefs for food and livelihoods. With the sudden influx of tourism from the completion of a new highway, now is a crucial time to ensure that future tourist development in this region is locally driven and environmentally responsible. As coral reefs are a foundati…	1	https://doi.org/10.1016/j.ocecoaman.2017.01.023		note they report damage outside the MPA implying they found conditions inside the MPA better (?)
127	SDG1: No Poverty	Poverty and protected areas: An evaluation of a marine integrated conservation and development project in Indonesia	1	Protected areas are currently the primary strategy employed worldwide to maintain ecosystem services and mitigate biodiversity loss. Despite the prevalence and planned expansion of protected areas, the impact of this conservation tool on human communities remains hotly contested in conservation policy. The social impacts of protected areas are poorly understood largely because previous evaluation…	1	https://doi.org/10.1016/j.gloenvcha.2014.04.003
128	SDG1: No Poverty	Integrated conservation and development: evaluating a community-based marine protected area project for equality of socioeconomic impacts	1	Despite the prevalence of protected areas, evidence of their impacts on people is weak and remains hotly contested in conservation policy. Akey question in this debate is whether socioeconomic impacts vary according to social subgroup. Given that social inequity can create conflict and impede poverty reduction, understanding how protected areas differentially affect people is critical to designin…	1	https://doi.org/10.1098/rstb.2014.0277
129	SDG1: No Poverty	Conservation and fisheries effects of spawning aggregation marine protected areas: What we know, where we should go, and what we need to get there	0	There is a global trend in the depletion of transient reef fish spawning aggregations (FSAs), making them a primary target for management with marine protected areas (MPAs). Here, we review the observed and likely effectiveness of FSA MPAs, discuss how future studies could fill knowledge gaps, and provide recommendations for MPA design based on species' life history and behaviour, enforcement pot…	0	https://doi.org/10.1093/icesjms/fsu038
130	SDG1: No Poverty	Coralline algae on hard and soft substrata of a temperate mixed siliciclastic-carbonatic platform: Sensitive assemblages in the Zannone area (western Pontine Archipelago; Tyrrhenian Sea)	0	In the Mediterranean Sea, coralline algae assemblages (i.e. rhodolith beds and coralligenous assemblages) are considered biodiversity hotspots comparable to tropical reefs. However, information regarding their environmental distribution is still poor. In this view, relevant international actions have been adopted by the European Union to fill this gap. This work represents one of a few cases of p…	0	https://doi.org/10.1016/j.marenvres.2019.03.009
131	SDG1: No Poverty	Searching for a compromise between biological and economic demands to protect vulnerable habitats	1	Identifying vulnerable habitats is necessary to designing and prioritizing efficient marine protected areas (MPAs) to sustain the renewal of living marine resources. However, vulnerable habitats rarely become MPAs due to conflicting interests such as fishing. We propose a spatial framework to help researchers and managers determine optimal conservation areas in a multi-species fishery, while also…	1	https://doi.org/10.1038/s41598-018-26130-z
132	SDG1: No Poverty	VARIATION IN ACROPORA PALMATA BLEACHING ACROSS BENTHIC ZONES AT BUCK ISLAND REEF NATIONAL MONUMENT (ST. CROIX, USVI) DURING THE 2005 THERMAL STRESS EVENT	0	At Buck Island Reef National Monument (BIRNM) in St. Croix, U.S. Virgin Islands, Acropora palmata (Lamarck, 1816) experienced extensive bleaching in 2005. Water temperatures at BIRNM in 2005 were higher than at any time since at least 1991, and exceeded the bleaching threshold by over 2 degrees C, causing extensive coral bleaching. Forty-four A. palmata colonies at three sites in BIRNM were sampl…	0
133	SDG1: No Poverty	Addressing distribution equity in spatial conservation prioritization for small-scale fisheries	1	Spatial conservation prioritization is used worldwide for designing marine protected areas (MPA) that achieve set conservation objectives with minimal impacts to marine users. People involved in small-scale fisheries (SSF) may incur negative and disproportionate impacts from implementing MPAs, yet limited available data often restricts their representation in MPA planning. Using a Philippines cas…	1	https://doi.org/10.1371/journal.pone.0233339
134	SDG1: No Poverty	Perceptions of fishing access restrictions and the disparity of benefits among stakeholder communities and nations of south-eastern Africa	1	Achieving high compliance with resource-use management policies is a critical concern to achieving sustainability, particularly in poor countries. Willingness to comply may depend on the values and perceptions of benefits and legitimacy of the restrictions. Consequently, we interviewed and evaluated the perceptions of fishing restrictions among similar to 2100 marine fisheries stakeholders (resou…	1	https://doi.org/10.1111/faf.12118
135	SDG1: No Poverty	Interactions between the implementation of marine protected areas and right-based fisheries management in Australia	0	The declaration of marine protected areas (MPAs) in Australia generates much confusion and controversy between government conservation and fisheries agencies, the fishing industry and NGOs. There are fundamental differences between the principles and practices underpinning the implementation of MPAs and fisheries management. This paper analyses the interactions between these two approaches to nat…	0	https://doi.org/10.1111/j.1365-2400.2004.00413.x
136	SDG1: No Poverty	Design of Realistic Hybrid Marine Resource Management Programs in Oceania	1	Robles-Zavala., 2014. Coastal livelihoods, poverty and well-being in Mexico. A case study of institutional and social constraints. Journal of Coastal Conservation, 18, p.431-448.	1	https://doi.org/10.2984/67.3.11
137	SDG1: No Poverty	Local community-based approach for sustainable management of artisanal fisheries on small islands	1	Socio-economic development of small island fishing communities is greatly dependent on local coastal and marine resources. Illegal fishing and aggressive practices in insular ecosystems lead to over exploitation and environmental deterioration. Moreover, a lack of scientific data increases uncertainty and prevents adequate monitoring of marine resources. This paper focuses on the integration of a…	0	https://doi.org/10.1016/j.ocecoaman.2017.03.031
138	SDG1: No Poverty	From community-based to centralised national management-A wrong turning for the governance of the marine protected area in Apo Island, Philippines?	1	Before the mid-1990s, Apo Island, Philippines, was often described as one of the world's best examples of community-based marine management. This paper studies the less-documented transition of the island during the late 1990s from community-based management to centralised national state management. Extensive interviewing of islanders has revealed deep misgivings about the centralised regime-the …	1	https://doi.org/10.1016/j.marpol.2009.04.011
139	SDG1: No Poverty	Coral assemblages in Tonga: spatial patterns, replenishment capacities, and implications for conservation strategies	1	Coral reefs in Tonga have been confronted by multiple threats of various origins, including large-scale disturbances and human-induced stressors. These reef communities have been poorly studied, and efficient conservation actions are urgently needed. The aim of this study was to: (1) examine the spatial distribution of coral assemblages in the lagoon of Tongatapu; (2) determine the degree to whic…	1	https://doi.org/10.1007/s10661-012-2982-5
140	SDG1: No Poverty	Pelagic bioregionalisation using open-access data for better planning of marine protected area networks	0	Systematic conservation planning (SCP) to design marine protected areas (MPAs) has traditionally focused on species distributions or benthic habitat features that drive the determination of conservation priorities. Pelagic ecosystem protection is usually incidental because these ecosystems are often data poor and are difficult to visualize in a planning context. Pelagic ecosystems, however, face …	0	https://doi.org/10.1016/j.ocecoaman.2017.08.017
141	SDG1: No Poverty	Identifying spatial conservation priorities using Traditional and Local Ecological Knowledge of iconic marine species and ecosystem threats	0	Marine Protected Areas (MPAs) can be an effective spatial approach to conservation, especially when they involve genuine consultation that considers the diversity of stakeholders. Participatory mapping and semi structured interviews were conducted with 52 stakeholders and 22 managers and scientists to identify ecological priorities and concerns across a large temperate MPA in Port Stephens-Great …	0	https://doi.org/10.1016/j.biocon.2020.108709
142	SDG1: No Poverty	Reexamining the science of marine protected areas: linking knowledge to action	1	Marine protected areas (MPAs) are often implemented to conserve or restore species, fisheries, habitats, ecosystems, and ecological functions and services; buffer against the ecological effects of climate change; and alleviate poverty in coastal communities. Scientific research provides valuable insights into the social and ecological impacts of MPAs, as well as the factors that shape these impac…	1	https://doi.org/10.1111/j.1755-263X.2011.00207.x
143	SDG1: No Poverty	Dynamite Fishing in a Marine Protected Area in Tanzania: Why Youth Perceptions Matter	1	Young men in coastal Tanzania are often blamed for damaging marine habitats by engaging in unsustainable and destructive fishing practices, including dynamite fishing, but their perceptions have not been sufficiently documented. While marine scientists, international environmental NGOs, and activists have called attention to the destructive fishing practices' devastating impacts, insights into th…	1	https://doi.org/10.1080/08920753.2019.1619902
144	SDG1: No Poverty	Marine protected areas: An old tool for new circumstances	0	Reserves and sanctuaries are age-old tools for conservation of fishery resources, but they are underutilized in managing heavily fished stocks in stressed marine ecosystems. Conventional fisheries management, which emphasizes controlling catch and fishing effort, can be effective but is insufficient under some circumstances. A new emphasis on ecosystem-based fisheries management argues that spati…	0
145	SDG1: No Poverty	Rapid declines across Australian fishery stocks indicate global sustainability targets will not be achieved without an expanded network of 'no-fishing' reserves	0	A continuing debate between environmental scientists and fisheries biologists on the sustainability of fisheries management practices, and the extent of fishing impacts on marine ecosystems, is unlikely to be resolved without fishery-independent data spanning large geographic and temporal scales. Here, we compare continental- and decadal-scale trends in fisheries catches with underwater reef moni…	0	https://doi.org/10.1002/aqc.2934
146	SDG1: No Poverty	Contextualizing the social-ecological outcomes of coral reef fisheries management	1	Marine protected areas (MPAs) have emerged as a valuable tool in biodiversity conservation and fisheries management. However, the effective use of MPAs depends upon the successful integration of social and ecological information. We investigated relationships between the social system structure of coastal communities alongside biological data describing the status and trends in fish communities a…	1	https://doi.org/10.1016/j.biocon.2019.108288		Implied
147	SDG1: No Poverty	Principles and approaches to abate seabird by-catch in longline fisheries	0	Mortality in longline fisheries is a critical global threat to most albatross and large petrel species. Here we identify key principles and approaches to identify and achieve broad use of effective seabird by-catch avoidance methods. Despite the availability of highly effective and cost-saving seabird avoidance methods, few longline fleets employ them. Given the political context and capacity of …	0	https://doi.org/10.1111/j.1467-2679.2005.00175.x
148	SDG1: No Poverty	Quantifying anthropogenic threats affecting Marine Protected Areas in developing countries	1	Conservation's capacity to deal with anthropogenic environmental threats within Marine Protected Areas (MPAs) varies enormously, especially in developing countries that are often immersed in weak enforcement, ineffective management and shortages of resources. A deeper understanding of the causes of these threats is fundamental for identifying effective management solutions. Here, we investigate t…	1	https://doi.org/10.1016/j.jenvman.2020.111614
149	SDG1: No Poverty	A generic framework to assess the representation and protection of benthic ecosystems in European marine protected areas	0	There is concern across the International Council for the Exploration of the Sea (ICES) region that a consideration of vulnerable components and the wider support mechanisms underpinning benthic marine ecosystems may be lacking from the process of marine protected area (MPA) designation, management and monitoring. In this study, MPAs across six European ecoregions were assessed from a benthic eco…	0	https://doi.org/10.1002/aqc.3401
150	SDG1: No Poverty	Population dynamics of a commercially harvested, non-native bivalve in an area protected for shorebirds: Ruditapes philippinarum in Poole Harbour, UK	0	The Manila clam Ruditapes philippinarum is one of the most commercially valuable bivalve species worldwide and its range is expanding, facilitated by aquaculture and fishing activities. In existing and new systems, the species may become commercially and ecologically important, supporting both local fishing activities and populations of shorebird predators of conservation importance. This study a…	0	https://doi.org/10.1051/alr/2019008
151	SDG1: No Poverty	MPA regulations should incorporate adaptive management-The case of Gilbert Bay Labrador Atlantic cod (Gadus morhua)	0	Although an important conservation tool, Marine Protected Areas sometimes fall short of intended goals; however, adaptive management can potentially improve their effectiveness. Efforts to develop an MPA in Gilbert Bay, Labrador, Canada, began in 1998 to protect the genetically distinct population of Atlantic cod (Gadus morhua) and its habitat. Population monitoring and research conducted in Gilb…	0	https://doi.org/10.1016/j.marpol.2014.03.025
152	SDG1: No Poverty	beta-Diversity and Species Accumulation in Antarctic Coastal Benthos: Influence of Habitat, Distance and Productivity on Ecological Connectivity	0	High Antarctic coastal marine environments are comparatively pristine with strong environmental gradients, which make them important places to investigate biodiversity relationships. Defining how different environmental features contribute to shifts in beta-diversity is especially important as these shifts reflect both spatio-temporal variations in species richness and the degree of ecological se…	0	https://doi.org/10.1371/journal.pone.0011899
153	SDG1: No Poverty	A novel projection technique to identify important at-sea areas for seabird conservation: An example using Northern gannets breeding in the North East Atlantic	0	Seabirds are well monitored and protected at their breeding grounds but spend most of their life at sea, where they are less well monitored and afforded little protection. In an attempt to address this dichotomy, attention has been directed toward establishing a network of marine reserves for seabirds, based largely on information from at-sea surveys and/or biotelemetry studies. Nevertheless, the…	0	https://doi.org/10.1016/j.biocon.2011.12.010
154	SDG1: No Poverty	Challenges of building co-management arrangements for management of the protected areas system in the Turks and Caicos Islands: Example of the princess Alexandra National Park	0	Management of Protected Areas in the Turks and Caicos Islands has undergone numerous institutional changes in its quest to develop into a self-financing and integrated system. Established in 1987, the Princess Alexandra National Park was the country's first protected area, and the Government of the Turks and Caicos Islands further expanded this number by 32 in 1992. The responsibility for the sys…	0
155	SDG1: No Poverty	Photovoice for mobilizing insights on human well-being in complex social-ecological systems: case studies from Kenya and South Africa	0	The value of diverse perspectives in social-ecological systems research and transdisciplinarity is well recognized. Human well-being and how it is derived from dynamic ecosystems is one area where local knowledge and perspectives are critical for designing interventions for sustainable pathways out of poverty. However, to realize the potential to enrich the understanding of complex dynamics for s…	0	https://doi.org/10.5751/ES-10259-230313
156	SDG1: No Poverty	Classifying benthic biotopes on sub-tropical continental shelf reefs: How useful are abiotic surrogates?	0	Biodiversity of marine areas beyond the reach of conventional diving technology (>30 m) is poorly known, yet subjected to increasing stresses from expanding recreational and commercial fishing, minerals exploration and other anthropogenic influences. In part, resource managers address this by using abiotic surrogates for patterns of biodiversity in planning marine protected areas or other managem…	0	https://doi.org/10.1016/j.ecss.2013.12.012
157	SDG1: No Poverty	Multi-analytical approach to zooarchaeological assemblages elucidates Late Holocene coastal lifeways in southwest Madagascar	0	The impact of resource exploitation by ancient human communities on Madagascar's environment is an area of intense debate. A fundamental question in the archaeology of Madagascar is the extent to which arrival of settlers, introduction of non-native plants and animals, and subsequent human exploitation of island biota, which catalyzed declines in biodiversity and significantly degraded environmen…	0	https://doi.org/10.1016/j.quaint.2017.09.019
158	SDG1: No Poverty	Episodic human activities and seasonal impacts on the Tachypleus gigas (Muller, 1785) population at Tanjung Selangor in Peninsular Malaysia	0	The scientific literature on population dynamics, breeding biology and nesting behaviour of the Asian horseshoe crabs is limited and still to emerge from several locations in South and Southeast Asia. The present study (2009-2011), aimed at observing the spawning activity of Tachypleus gigas (Muller, 1785) in relation to local environmental conditions, was carried out from Tanjung Selangor (Sites…	0	https://doi.org/10.1016/j.ecss.2015.08.003
159	SDG1: No Poverty	Egg production of turbot, Scophthalmus maximus, in the Baltic Sea	0	In the brackish water Baltic Sea turbot spawn at similar to 6-9 psu along the coast and on offshore banks in ICES SD 24-29, with salinity influencing the reproductive success. The potential fecundity (the stock of vitellogenic oocytes in the pre-spawning ovary), egg size (diameter and dry weight of artificially fertilized 1-day-old eggs) and gonad dry weight were assessed for fish sampled in SD 2…	0	https://doi.org/10.1016/j.seares.2012.07.009
160	SDG1: No Poverty	Perceptions of Threats Facing Cabo de Palos - Islas Hormigas MPA and Potential Solutions	1	Many marine protected areas (MPAs) face a multitude of threats to the ecosystems that they have been established to conserve. This study is based on 111 interviews conducted in 2013-2014 designed to discover the perceptions of stakeholders about the threats, the causes of the threats, and their responses to the threats, to a well-established MPA - Cabo de Palos - Islas Hormigas (CPH-MPA). This MP…	1	https://doi.org/10.1080/08920753.2018.1405330
161	SDG1: No Poverty	Social impacts of a temperate fisheries closure: understanding stakeholders' views	1	The social dimensions of marine protected areas (MPAs) play an important role in MPA success, yet these social dimensions are little understood. We explore the social impacts arising from the establishment of an MPA using Lyme Bay (south west England) as a case study. Through a series of small group semi-structured interviews the social impacts experienced by fishermen (mobile and static gear), r…	1	https://doi.org/10.1016/j.marpol.2013.09.005
162	SDG1: No Poverty	Effects of natural barriers on the spillover of a marine mollusc: implications for fisheries reserves	0	1. The movement of organisms and dispersal of propagules is fundamental to the maintenance of populations over time. However, the existence of barriers, created through the spatial configuration of habitats, may significantly affect dispersal patterns and thus influence community dynamics and resource sustainability. 2. Within marine environments unstructured or open habitats may form partial or …	0	https://doi.org/10.1002/aqc.562
163	SDG1: No Poverty	The performance of fisheries management systems and the ecosystem challenge	0	This Chapter has three objectives. First, it presents a modest update of the evidence used in the 1997 study by the Organisation for Economic Co-operation and Development (OECD) that attempted to show which management measures are effective in conserving marine fisheries and producing significant economic and social benefits. In its original report, the OECD found that competitive total allowable…	0	https://doi.org/10.1079/9780851996332.0291
164	SDG1: No Poverty	Systematic marine conservation planning in data-poor regions: Socioeconomic data is essential	0	Systematic planning for conservation is highly regarded but relies on spatially explicit data that are lacking in many areas of conservation concern. The decision support tool Marxan is applied to a reef system in the central Philippines where 30 marine protected areas (MPAs) have been established in communities without much use of biophysical data. The intent was to explore how Marxan might assi…	0	https://doi.org/10.1016/j.marpol.2009.02.011
165	SDG1: No Poverty	Indigenous protected areas in Sea Country: Indigenous-driven collaborative marine protected areas in Australia	1	In many parts of the world, policymakers, legislators, marine managers, and indigenous peoples have attempted to reconcile marine protected area (MPA) governance and management with indigenous peoples' ancient and ongoing traditional ownership of coastal and marine environments. This paper describes a novel approach in Australia to addressing this challenge through indigenous-led planning and col…	1	https://doi.org/10.1002/aqc.3052
166	SDG1: No Poverty	Cultural and socio-economic impacts of Mediterranean marine protected areas	1	Marine protected areas (MPAs) may be important for protecting the marine environment, but they may also have substantial socio-cultural impacts about which very little is currently known, or acknowledged. In the Mediterranean,few data are available on the socio-economic consequences of MPAs. The present study reviews the existing data on MPAs in Spain, France, Italy and Greece. A general increase…	1	https://doi.org/10.1017/S0376892900000163
167	SDG1: No Poverty	The application of genetics to marine management and conservation: examples from the Indo-Pacific	0	Molecular tools and analyses have played pivotal roles in uncovering the processes and patterns of biodiversity in the Indian and Pacific oceans. However, integrating genetic results into management and conservation objectives has been challenging, with few examples that show practical applicability. This review aims to address some of the perceived barriers to an enhanced approach that integrate…	0	https://doi.org/10.5343/bms.2012.1079
168	SDG1: No Poverty	Integrated management to address the incidental mortality of seabirds in longline fisheries	0	1. Of the myriad of anthropogenic and natural threats to seabirds, one of the most critical global problems is incidental mortality in longline fisheries. Hesitance or failure by fishery managers and longline industries to adequately address this acute problem could result in the extinction of several albatross and petrel species within our lifetimes. 2. An integrated management approach is neede…	0	https://doi.org/10.1002/aqc.446
169	SDG1: No Poverty	Range Extension of Mesophotic Kelps (Ochrophyta: Laminariales and Tilopteridales) in the Central North Atlantic: Opportunities for Marine Forest Research and Conservation	0	Kelp was first recorded for the remote warm-temperate Azores archipelago (central North Atlantic) in 1971, when a few Laminaria specimens were collected on the Formigas Bank at depths beyond conventional SCUBA diving reach. A shortage of technical means and projects targeting mesophotic environments has since kept this offshore marine protected area as the single known kelp occurrence site. Here,…	0	https://doi.org/10.1111/jpy.13162
170	SDG1: No Poverty	Biodiversity, conservation, and the 'Taxonomic impediment'	0	1. This paper highlights the poor esteem in which taxonomy, as autonomous science, is held and the relative implications of this for conservation biology. 2. In recent times, taxonomy at the species level has tended to be neglected not just within ecological researches, but also in the identification and justification for the selection of the marine protected areas (MPA). A traditional criterion …	0	https://doi.org/10.1002/aqc.584
171	SDG1: No Poverty	Fish assemblages on fringing reefs in the southern Caribbean: biodiversity, biomass and feeding types	0	Reef fish assemblages in the Caribbean are under increasing pressure from human activities. Inadequate enforcement of legislation coupled with unreliable and data-poor landings in Tobago have led to the unregulated exploitation of reef fish for decades. This study addresses the lack of data on major reefs. Visual observations of fish fauna were conducted from November 2011-May 2013 at open access…	0
172	SDG1: No Poverty	Evaluation of participation in and management of the Transkei shore linefishery	0	Both roving creel and aerial surveys were used to quantify fishing effort along the former Transkei coast. A stratified random sampling procedure was used during shore patrols to assess catch and effort, and a questionnaire survey provided information on total fishing effort, fisher demographics and attitudes towards current regulations. A total of 13 field trips was undertaken, during which 341 …	0	https://doi.org/10.2989/18142320309504002
173	SDG1: No Poverty	Status, trends and challenges in the sustainability of small-scale fisheries in the Philippines: Insights from FISHDA (Fishing Industries' Support in Handling Decisions Application) model	1	Managing small-scale fisheries in a developing country like the Philippines is very challenging because of high pressures from expanding fishing population, poverty and lack of alternative options. Thus, resource-focused fisheries management initiatives such as marine protected area (MPA) establishment will likely result in further marginalization of the poor fishers which could pose more serious…	1	https://doi.org/10.1016/j.marpol.2013.08.026
174	SDG1: No Poverty	Phylogeography of the Patelloida profunda group (Gastropoda : Lottidae): diversification in a dispersal-driven marine system	0	In the last decade, greater than expected levels of genetic structure have been reported for many marine taxa with high dispersal capabilities. Although little-studied to date, it is predicted that taxa with poor dispersal abilities would exhibit even more genetic differentiation than high dispersal taxa. These systems may track biogeographical processes better than more dispersive taxa and, more…	0	https://doi.org/10.1111/j.1365-294X.2004.02284.x
175	SDG1: No Poverty	A habitat-based approach to predict impacts of marine protected areas on fishers	1	Although marine protected areas can simultaneously contribute to biodiversity conservation and fisheries management, the global network is biased toward particular ecosystem types because they have been established primarily in an ad hoc fashion. The optimization of trade-offs between biodiversity benefits and socioeconomic values increases success of protected areas and minimizes enforcement cos…	1	https://doi.org/10.1111/cobi.12974
176	SDG1: No Poverty	Scaling tropical island conservation planning to the regional level can lead to unbalanced ecological representation and poor social equity among islands	1	The effectiveness of Marine Protected Areas (MPA) to manage natural resources has been undermined in small insular lagoons due to massive mortalities triggered by climatic events that have hit some lagoons but not others. To minimize the future risk of ineffective management efforts, it has previously been argued that management should focus on a multi-island conservation target (regional scale),…	1	https://doi.org/10.1016/j.marpol.2018.03.024
177	SDG1: No Poverty	The Eastern Australian region: a dynamic tropical/temperate biotone	0	Eastern Australia lies in an overlap of tropical IndoPacific and temperate bioregions because of the influence of the southward-flowing East Australian Current. It has a very high biodiversity, from tropical coral reef and seagrass in the north, to coastal lakes and help communities in the south. Offshore, Norfolk and Lord Howe Islands and Elizabeth and Middleton Reefs, are the highest latitude c…	0	https://doi.org/10.1016/S0025-326X(00)00110-7
178	SDG1: No Poverty	Costa Rica's Marine Protected Areas: status and perspectives	1	With 51 100km(2) of terrestrial area and 589 000km(2) of national waters, Costa Rica is considered one of the countries with the greatest biodiversity. It has approximately 3.5% of the world marine species. In the last four decades. Costa Rica has done a considerable effort to create a representative system of Protected Areas (PA), mainly terrestrial. We present an assessment of the current situa…	1
179	SDG1: No Poverty	Understanding marine park opposition: the relationship between social impacts, environmental knowledge and motivation to fish	1	1. Marine protected areas (MPAs), are being vigorously pursued globally but meeting significant resistance at a local level. Despite this, there is limited research into the factors that drive this resistance. 2. The Port Stephens-Great Lakes Marine Park (PSGLMP) and Batemans Marine Park (BMP), both situated in New South Wales (NSW) Australia, were established in December 2005 and April 2006 resp…	1	https://doi.org/10.1002/aqc.2363
180	SDG1: No Poverty	Twelve Recommendations for Advancing Marine Conservation in European and Contiguous Seas	0	Like most ocean regions today, the European and contiguous seas experience cumulative impacts from local human activities and global pressures. They are largely in poor environmental condition with deteriorating trends. Despite several success stories, European policies for marine conservation fall short of being effective. Acknowledging the challenges for marine conservation, a 4-year multi-nati…	0	https://doi.org/10.3389/fmars.2020.565968
181	SDG1: No Poverty	Designing marine reserves to reflect local socioeconomic conditions: lessons from long-enduring customary management systems	1	Coral reef conservation strategies such as marine protected areas have met limited success in many developing countries. Some researchers attribute part of these shortcomings to inadequate attention to the social context of conserving marine resources. To gain insights into applying Western conservation theory more successfully in the socioeconomic context of developing countries, this study exam…	1	https://doi.org/10.1007/s00338-007-0213-2
182	SDG1: No Poverty	Effects of habitat, fishing, and fisheries management on reef fish populations in Palau	0	Palau has a rich tradition of fisheries management and stewardship of its waters, and as in many island nations, small-scale coral reef fisheries are a vital part of the local culture, economy, and food security. However, reef fisheries in Palau are data-poor and there is increasing concern that reef fish stocks are declining. To evaluate the current and future status of these resources, informat…	0	https://doi.org/10.1016/j.fishres.2021.105996
183	SDG1: No Poverty	The Malta project: An example of the new cycle of MAP-UNEP projects, oriented on sustainable development of coastal areas in the Mediterranean region	0	The paper presents the characteristics and hitherto results of the ongoing Malta project, implemented by MAP-UNEP within its Coastal Areas Management Programme (CAMP). The project is the first of the new cycle, focused on sustainable development, containing innovative Elements concerning: methodologies and tools specific fdr sustainable development; project activities; structure; and organization…	0
184	SDG1: No Poverty	Some Implications of High Biodiversity for Management of Tropical Marine Ecosystems-An Australian Perspective	0	While high biodiversity has been widely reported from the tropics, we suggest that in reality there is a considerable underestimate of the total biodiversity. We have concentrated on the tropical regions of Australia and the Coral Triangle. The best known groups are the corals, fish, and commercially important invertebrates. In considering whether this is true, we have concentrated on the diversi…	0	https://doi.org/10.3390/d10010001
185	SDG1: No Poverty	Relationships between mobile macroinvertebrates and reef structure in a temperate marine reserve	0	Relationships between different metrics of reef structure and the density of macroinvertebrates were examined at 3 nested spatial scales inside and outside a long-established, 'no-take' marine protected area (MPA) at Maria Island, Tasmania, Australia. Generalized linear models were developed that best explained the contributions of rugosity, substratum composition (different-sized boulders, bedro…	0	https://doi.org/10.3354/meps08210
186	SDG1: No Poverty	Designing MPAs for food security in open-access fisheries	1	Food security remains a principal challenge in the developing tropics where communities rely heavily on marine-based protein. While some improvements in fisheries management have been made in these regions, a large fraction of coastal fisheries remain unmanaged, mismanaged, or use only crude input controls. These quasi-open-access conditions often lead to severe overfishing, depleted stocks, and …	1	https://doi.org/10.1038/s41598-019-44406-w
187	SDG1: No Poverty	Indo-Pacific humpback dolphins (Sousa chinensis) in the Moyang River Estuary: The western part of the world's largest population of humpback dolphins	0	Information gaps from uninvestigated habitats can hinder population assessments and the efficacy of conservation actions for marine mammals, particularly for populations of widely distributed species. The full extent of occurrence of the world's largest (putative) population of Indo-Pacific humpback dolphins (Sousa chinensis) in the Pearl River estuary (PRE) is not known due to a poor understandi…	0	https://doi.org/10.1002/aqc.3055
188	SDG1: No Poverty	Low satisfaction and failed relational coordination among relevant stakeholders in Spanish Mediterranean marine protected areas	0	Marine protected areas (MPAs) are a conservation tool that are increasingly commonplace around the world. MPAs have the potential to benefit both ecosystems and human communities if well-designed and implemented. Achieving effective implementation and governance of MPAs, however, is complicated because they deal with systems that overlap with both non-human environments and human economies and so…	0	https://doi.org/10.1016/j.jenvman.2020.111003
189	SDG1: No Poverty	Improving alternative livelihood interventions in marine protected areas: A case study in Tanzania	1	Alternative livelihood programmes are often used in multipleuse marine protected areas as incentives, compensation for lost opportunities, or as intervention strategies for poverty alleviation. Yet little is known about their impacts on biodiversity conservation and the well-being of the targeted communities. This study focuses primarily on alternative livelihood projects undertaken among selecte…	1	https://doi.org/10.1016/j.marpol.2016.04.025
190	SDG1: No Poverty	Comparing sustainable development measurement based on different priorities: sustainable development goals, economics, and human well-being-Southeast Europe case	0	Sustainability analysis practice has so far proved that measurement of the level of sustainable development (SD) is associated with a large number of methodological difficulties and limitations, related mainly to the selection of indicators, data processing and interpretation of the results. This study is based on an assumption that SD should be measured in ways that depend on the level of develo…	0	https://doi.org/10.1007/s11625-018-0557-2
191	SDG1: No Poverty	Ecological coherence of marine protected area networks: a spatial assessment using species distribution models	0	P>1. The juvenile stages of fish are often dependent on specific habitat types for their survival. Protecting these habitats may be crucial for maintaining strong adult stocks. The Natura 2000 network of the European Union offers protection of marine habitats that are essential for the recruitment of many fish species. By protecting these critical habitats the network may be important for maintai…	0	https://doi.org/10.1111/j.1365-2664.2010.01892.x
192	SDG1: No Poverty	Assessment and management of the North Brazil Shelf Large Marine Ecosystem	1	The North Brazil Shelf is a Large Marine Ecosystem (LME) that extends from the Caribbean Sea, in Central America, to the Parnaiba River in Brazil, and includes six countries. The area is dominated by the runoff of large rivers, including the Amazon and Orinoco, and by the intense disturbance of sediment transport, tides and currents. The sea bed is formed mainly by mud in shallow water, and by sa…	1	https://doi.org/10.1016/j.envdev.2016.11.004
193	SDG1: No Poverty	Using baited remote underwater videos (BRUVs) to characterize chondrichthyan communities in a global biodiversity hotspot	0	Threatened chondrichthyan diversity is high in developing countries where scarce resources, limited data, and minimal stakeholder support often render conservation efforts challenging. As such, data on many species, including many evolutionarily distinct endemics, is poor in these countries and their conservation status and habitat needs remain uncertain. Here, we used baited remote underwater vi…	0	https://doi.org/10.1371/journal.pone.0225859
194	SDG1: No Poverty	Benefits and Challenges of Scaling Up Expansion of Marine Protected Area Networks in the Verde Island Passage, Central Philippines	0	Locally-established marine protected areas (MPAs) have been proven to achieve local-scale fisheries and conservation objectives. However, since many of these MPAs were not designed to form ecologically-connected networks, their contributions to broader-scale goals such as complementarity and connectivity can be limited. In contrast, integrated networks of MPAs designed with systematic conservatio…	0	https://doi.org/10.1371/journal.pone.0135789
195	SDG1: No Poverty	Use of monitoring data to support conservation management and policy decisions in Micronesia	0	Adaptive management implies a continuous knowledge-based decision-making process in conservation. Yet, the coupling of scientific monitoring and management frameworks remains rare in practice because formal and informal communication pathways are lacking. We examined 4 cases in Micronesia where conservation practitioners are using new knowledge in the form of monitoring data to advance marine con…	0	https://doi.org/10.1111/cobi.12542
196	SDG1: No Poverty	OSS: A Spatial Decision Support System for Optimal Zoning of Marine Protected Areas	0	We have developed the Optimisation Support System (OSS), a spatial decision support system, to deliver optimal solutions to the problem of identifying comprehensive, adequate and representative locations for conservation planning. The South Australian Government is committed to establishing a comprehensive, adequate and representative system of 19 marine protected areas (MPAs) by 2010. Each MPA w…	0
197	SDG1: No Poverty	Why the damselfish Chromis chromis is a key species in the Mediterranean rocky littoral-a quantitative perspective	0	The damselfish Chromis chromis is typically the most abundant fish species in the rocky littoral environment of the Mediterranean Sea, where it feeds in huge shoals on incoming zooplankton and rests near the seabed each night. Research has shown that large populations of C. chromis play a fundamental role by transferring carbon, nitrogen and phosphorus directly from the pelagic system to the litt…	0	https://doi.org/10.1111/jfb.13551
198	SDG1: No Poverty	Status of coral reefs in Antigua & Barbuda: using data to inform management	0	The nation of Antigua and Barbuda has experienced major degradation of its coral reef ecosystems over the past 40+ years. The primary drivers of this degradation are multiple and are highly linked to anthropogenic influences, including over-exploitation and poor management of marine resources. The effectiveness of management actions in marine protected areas (MPAs) has often been hampered by a la…	0	https://doi.org/10.7717/peerj.9236
199	SDG1: No Poverty	Comparing large-scale bioregions and fine-scale community-level biodiversity predictions from subtidal rocky reefs across south-eastern Australia	0	1. In the absence of knowledge of the large-scale structure and distribution of marine biota, bioregionalisations, that is, spatial classifications of data on a range of environmental and/or biological attributes, are often viewed as one of the most appropriate frameworks within which to develop networks of marine protected areas (MPAs). However, despite their potential usefulness, few studies ha…	0	https://doi.org/10.1111/j.1365-2664.2012.02155.x
200	SDG1: No Poverty	Protection of Genetic Diversity and Maintenance of Connectivity among Reef Corals within Marine Protected Areas	0	High-latitude coral reefs (HLRs) are potentially vulnerable marine ecosystems facing well-documented threats to tropical reefs and exposure to suboptimal temperatures and insolation. In addition, because of their geographic isolation, HLRs may have poor or erratic larval connections to tropical reefs and a reduced genetic diversity and capacity to respond to environmental change. On Australia's e…	0	https://doi.org/10.1111/j.1523-1739.2008.00985.x
201	SDG1: No Poverty	Practicality of marine protected areas - Can there be solutions for the River Indus delta?	0	The River Indus delta is the most prominent feature on the Pakistan coast. Owing to its prominence, mangrove ecosystem, historical, ecological and economic significance it is also a proposed Marine Protected Area (MPA). Currently there are no designated MPAs in Pakistan. This paper presents findings of the Fishery Resource Appraisal Project of Pakistan (FRAPP) a fishery stock assessment carried o…	0	https://doi.org/10.1016/j.ecss.2016.09.016
202	SDG1: No Poverty	Low-cost Bathymetric Survey for Marine Protected Areas: coral reefs and coastal islands	0	Bathymetry surveys are the first step for every conservation effort on Marine Protected Areas (MPAs). Maps depicting depth and bottom geomorphology are used to generate hillshades, that later become basemaps for other themes, such as fish distribution, bottom types, and water quality. Bathymetry map availability is limited or non-existent at the scales that are necessary for MPA management plans.…	0
203	SDG1: No Poverty	Improving Stakeholder and Authority Cooperation among Coastal Fishing Communities using Passive Blast Monitoring Data	0	An increased awareness of the mounting pressure on the marine ecosystem as well as the enormity of the recreational SCUBA dive industry has brought about a greater awareness of the challenges facing the marine environment. One key issue is destructive fishing. Destructive fishing is a blanket term used to describe a multitude of fishing methods which are low cost and extremely effective in terms …	0
204	SDG1: No Poverty	Adaptive management of the Great Barrier Reef: A globally significant demonstration of the benefits of networks of marine reserves	0	The Great Barrier Reef (GBR) provides a globally significant demonstration of the effectiveness of large-scale networks of marine reserves in contributing to integrated, adaptive management. Comprehensive review of available evidence shows major, rapid benefits of no-take areas for targeted fish and sharks, in both reef and nonreef habitats, with potential benefits for fisheries as well as biodiv…	0	https://doi.org/10.1073/pnas.0909335107
205	SDG1: No Poverty	Honduras: Caribbean coast	0	The coast of Honduras, Central America, represents the southern end of the Mesoamerican Barrier Reef System, although its marine resources are less extensive and studied than nearby Belize and Mexico. However, the coastal zone contains mainland reef formations, mangroves, wetlands, seagrass beds and extensive fringing reefs around its offshore islands, and has a key role in the economy of the cou…	0	https://doi.org/10.1016/S0025-326X(01)00239-9
206	SDG1: No Poverty	Latin American benthic shellfisheries: emphasis on co-management and experimental practices	1	In Latin America the small-scale fishery of marine benthic invertebrates is based on high-value species. It represents a source of food and employment and generates important incomes to fishers and, in some cases, export earnings for the countries. In the review, we define 2 key concepts: small-scale fishery and co-management. We address the temporal extractive phases which Latin American shellfi…	1	https://doi.org/10.1023/A:1014235924952
207	SDG1: No Poverty	Crimean Marine Protected Areas: Present Status and Long-Term Policy	1	The coastline of the Crimean peninsula is about 2,500 km long; meanwhile only. 31 protected objects can be defined as marine protected areas (MPA). The most of them (20) were circumscribed in 1972 as the appenages of terrestrial reserves and were lacking of detailed scientific information, environmental background, demarcation and sustainable protection. This status cannot assure the conservation…	1
208	SDG1: No Poverty	Distance from a Fishing Community Explains Fish Abundance in a No-Take Zone with Weak Compliance	1	There are numerous examples of no-take marine reserves effectively conserving fish stocks within their boundaries. However, no-take reserves can be rendered ineffective and turned into 'paper parks' through poor compliance and weak enforcement of reserve regulations. Long-term monitoring is thus essential to assess the effectiveness of marine reserves in meeting conservation and management object…	1	https://doi.org/10.1371/journal.pone.0126098
209	SDG1: No Poverty	Positive Social-Ecological Feedbacks in Community-Based Conservation	1	Marine area-based conservation measures including no-take zones (areas with no fishing allowed) are often designed through lengthy processes that aim to optimize for ecological and social objectives. Their (semi) permanence generates high stakes in what seems like a one-shot game. In this paper, we theoretically and empirically explore a model of short-term area-based conservation that prioritize…	1	https://doi.org/10.3389/fmars.2021.652318
210	SDG1: No Poverty	Patterns and prediction of population recovery in marine reserves	0	Marine reserves (no-take zones) are widely recommended as conservation and fishery management tools. One potential benefit of marine reserves is that they can reduce fishing mortality. This can lead to increases in the abundance of spawners, providing insurance against recruitment failure and maintaining or enhancing yields in fished areas. This paper considers the factors that influence recovery…	0	https://doi.org/10.1023/A:1016619102955
211	SDG1: No Poverty	Reef fish biomass recovery within community-managed no take zones	0	Locally managed marine areas (LMMAs) are increasingly recognised as a key strategy for small-scale fisheries management across the Indo-Pacific. When effective, LMMAs can encourage responsible fishing, strengthen compliance and improve adaptive capacity, and may help to safeguard food security, address coastal poverty and increase resource sustainability. However, evidence that LMMAs can achieve …	0	https://doi.org/10.1016/j.ocecoaman.2020.105210
212	SDG1: No Poverty	The Indian Ocean coast of Somalia	0	Somalia has the longest national coastline (3025 km) in Africa with an estimated shelf area (depth 0-200 m) of 32500 km(2). The country is divided into the northern coastal plain of Guban, which has a semi-arid terrain; the northern highlands with rugged mountain ranges containing the country's highest peak (2407 m); and the Ogaden region which descends to the south from the highlands and which c…	0	https://doi.org/10.1016/S0025-326X(00)00107-7
213	SDG1: No Poverty	Rocky intertidal communities: past environmental changes, present status and predictions for the next 25 years	0	Rocky shores occur at the interface of the land and sea. Typically they are open ecosystems, with steep environmental gradients. Their accessibility to man has rendered them susceptible to a variety of impacts since prehistoric times. Access can be regulated, however, and they are more amenable to management than open ocean habitats. This review uses examples from throughout the world to demonstr…	0	https://doi.org/10.1017/S0376892902000115
214	SDG1: No Poverty	Epimeria of the Southern Ocean with notes on their relatives (Crustacea, Amphipoda, Eusiroidea)	0	The present monograph includes general systematic considerations on the family Epimeriidae, a revision of the genus Epimeria Costa in Hope, 1851 in the Southern Ocean, and a shorter account on putatively related eusiroid taxa occurring in Antarctic and sub-Antarctic seas. The former epimeriid genera Actinacanthus Stebbing, 1888 and Paramphithoe Bruzelius, 1859 are transferred to other families, r…	0	https://doi.org/10.5852/ejt.2017.359
215	SDG1: No Poverty	Potential contributions of marine reserves to sustainable fisheries: Recent modeling results	0	Marine reserves are being recommended worldwide as a means of protecting biodiversity and increasing fishery sustainability. This has created a need for policy makers to understand how marine reserves can contribute to sustainable fisheries, relative to other approaches. The contribution of marine reserves to the problem of sustainable fisheries depends on whether they can control catch better th…	0
216	SDG1: No Poverty	Fifty years on: Lessons from marine reserves in New Zealand and principles for a worldwide network	0	New Zealand pioneered marine reserves, areas in the sea protected from all direct human interference. The first reserve was proposed in 1965 and established in 1977. It has operated successfully ever since. Even one instance proves that such things are possible. All marine reserves in NZ were initially greeted by a range of objections, and widespread and often loud opposition, This is not surpris…	0	https://doi.org/10.1016/j.biocon.2014.01.014
217	SDG1: No Poverty	Untapped Potential of Citizen Science in Mexican Small-Scale Fisheries	0	Citizen science is a rapidly growing field with well-designed and run citizen science projects providing substantial benefits for conservation and management. Marine citizen science presents a unique set of challenges and lags behind terrestrial citizen science, but also provides significant opportunities to work in data-poor fisheries. This paper analyses case studies of citizen science projects…	0	https://doi.org/10.3389/fmars.2019.00517
218	SDG1: No Poverty	Effectiveness of Philippine Nationally Managed Marine Reserves in Improving Biomass and Trophic Structure of Coral Reef Fish Communities	0	Many studies have examined the performance of locally managed marine reserves in the Philippines but the effectiveness of nationally managed marine reserves under the National Integrated Protected Areas System (NIPAS) Act is poorly understood. This study assessed the biomass and trophic structure of reef fishes inside and outside marine reserves from seven NIPAS seascapes. These were compared to …	0	https://doi.org/10.1080/08920753.2021.1899944
219	SDG1: No Poverty	Marine ornamental species from European waters: a valuable overlooked resource or a future threat for the conservation of marine ecosystems?	0	The worldwide growth of the marine aquarium market has contributed to the degradation of coral reef ecosystems. Enforcing the legislation on importing ornamental species has led some European traders to concentrate on local species. Portugal is used as a case study of marine ornamental fish and invertebrate collection in European waters. One hundred and seventy two species occurring in Portuguese…	0	https://doi.org/10.3989/scimar.2006.70n3389
220	SDG1: No Poverty	Understanding changes to fish stock abundance and associated conflicts: Perceptions of small-scale fishers from the Amazon coast of Brazil	0	The perceptions and knowledge of fishers are very important for fisheries management, especially in data-poor regions such as the Amazon coast of Brazil. Here, the perceptions of fishers were used to analyze the main conflicts faced by small-scale fisheries and to identify the status of fishery resources in the state of Amapa (Brazil). Data from interviews with 359 fishers were analyzed. Conflict…	0	https://doi.org/10.1016/j.ocecoaman.2019.104954
221	SDG1: No Poverty	The importance of incorporating fine-scale habitat data into the design of an, intertidal marine reserve system	1	There is concern about the reliability of surrogate measures to represent biodiversity and the use of such measures in the design of marine reserve systems. Currently, surrogate measures are most often based on broad-scale (100-1000s of km) bioregional frameworks that define general categories (sandy beach, rocky shore) for intertidal systems. These broad-scale categories are inadequate when maki…	1	https://doi.org/10.1016/j.biocon.2007.03.021
222	SDG1: No Poverty	Bottom-up effects of a no-take zone on endangered penguin demographics	0	Marine no-take zones can have positive impacts for target species and are increasingly important management tools. However, whether they indirectly benefit higher order predators remains unclear. The endangered African penguin (Spheniscus demersus) depends on commercially exploited forage fish. We examined how chick survival responded to an experimental 3-year fishery closure around Robben Island…	0	https://doi.org/10.1098/rsbl.2015.0237
223	SDG1: No Poverty	Change in the rocky reef fish fauna of the iconic Poor Knights Islands Marine Reserve in north-eastern New Zealand over 4 decades	0	Marine reserves exhibit increases in targeted fish species, but long-term effects on biodiversity are poorly understood. Factors other than reserve status may affect decadal changes, including environmental change. We examined the fish fauna at the iconic Poor Knights Islands over 4 decades (1974-2016) before and after implementation of a no-take marine reserve in 1998. We document a substantial …	0	https://doi.org/10.1071/MF18037
224	SDG1: No Poverty	Rapid recolonisation of snapper Pagrus auratus: Sparidae within an offshore island marine reserve after implementation of no-take status	0	This study reports the response of snapper Pagrus auratus to the establishment of no-take status in a marine reserve around the Poor Knights Islands in northeastern New Zealand. The Poor Knights and 2 reference locations, Cape Brett and the Mokohinau Islands, were sampled biannually for 4 yr using baited underwater video (BUV). Following the implementation of full marine reserve status at the Poo…	0	https://doi.org/10.3354/meps272183
225	SDG1: No Poverty	Winners and Losers in Marine Conservation: Fishers' Displacement and Livelihood Benefits from Marine Reserves	1	Marine reserves can create both benefits and costs to fishers. This article explores the perceptions of fishers in Kenya and Seychelles about displacement, spillover, and overall impacts of local marine reserves on their livelihoods. We test whether these perceptions are different among fishers from different geographic and socioeconomic conditions. Sixty-six percent of fishers had been displaced…	1	https://doi.org/10.1080/08941920.2014.918229
226	SDG1: No Poverty	Small marine reserves do not provide a safeguard against overfishing	0	Marine reserves aim to protect harvested species within their boundaries and can therefore provide insurance against the effects of overfishing. To evaluate whether marine reserves are meeting this expectation, we compiled over 40 years of rock lobster (Jasus edwardsii) monitoring data and examined long-term trends in three relatively small marine reserves (c.4-8 km(2)) in northern New Zealand, a…	0	https://doi.org/10.1111/csp2.362
227	SDG1: No Poverty	Small Scale Fisheries Management: Lessons from Cockle Harvesters in Nicaragua and Tanzania	0	The role of women in gleaning fisheries tends to be underestimated and poorly documented although they play an important role in coastal food security and income generation. This article describes two initiatives for co-management of women dominated cockle (Anadara spp.) fisheries implemented in Zanzibar Island of Tanzania and in Nicaragua that were based on a Fiji model. In each case, significan…	0	https://doi.org/10.1080/08920753.2010.483174
228	SDG1: No Poverty	Useful science for coral reef management: The Cooperative Research Centre model	0	A cooperative research center based in Townsville, Australia, has completed almost 6 yrs of applied and strategic research, education, and extension in support of conservation and ecologically sustainable use of the Great Barrier Reef World Heritage Area. One cornerstone of its success has been the involvement of scientists, representatives from industry, and managers in project development, cond…	0
229	SDG1: No Poverty	A sea change on the African coast? Preliminary social and ecological outcomes of a governance transformation in Kenyan fisheries	1	We examined social and ecological outcomes over a period of transformational change in the governance of Kenyan fisheries. Devolving decision-making power to local communities initially promoted a perception of winners and losers among resource users, but after just 6 years, there were virtually no resource users who felt that the new governance arrangement was detrimental to their livelihood. Th…	1	https://doi.org/10.1016/j.gloenvcha.2014.10.003
230	SDG1: No Poverty	Assessing the Effect of Marine Reserves on Household Food Security in Kenyan Coral Reef Fishing Communities	1	Measuring the success or failure of natural resource management is a key challenge to evaluate the impact of conservation for ecological, economic and social outcomes. Marine reserves are a popular tool for managing coastal ecosystems and resources yet surprisingly few studies have quantified the social-economic impacts of marine reserves on food security despite the critical importance of this o…	1	https://doi.org/10.1371/journal.pone.0113614
231	SDG1: No Poverty	Effects of fishing effort and catch rate upon the structure and biomass of Fijian reef fish communities	0	1. An improved understanding of fishing effects is required to assess the sustainability of existing fishing practices and to determine the ecological implications of offering fishing concessions in marine reserves. 2. The effects of fishing were investigated in six Fijian fishing grounds (qoliqoli) subject to different fishing intensities. 3. A visual census technique was used to determine the s…	0	https://doi.org/10.2307/2404761
232	SDG1: No Poverty	Efficacy of baited remote underwater video systems and bait type in the cool-temperature zone for monitoring 'no-take' marine reserves	0	Cool-temperate reef fish assemblages are often poorly described below 20 m because of depth limitations of conventional diver-based visual census. The recent development of baited remote underwater video systems (BRUVs) provide an alternative quantitative sampling method. Despite being used in warmer temperate and tropical waters and cool-temperate waters in Victoria, initial trials of vertical B…	0	https://doi.org/10.1071/MF15165
233	SDG1: No Poverty	Benthic status of near-shore fishing grounds in the central Philippines and associated seahorse densities	0	Benthic status of 28 near-shore, artisanal, coral reef fishing grounds in the central Philippines was assessed (2000-2002) together with surveys of the seahorse, Hippocampus comes. Our measures of benthic quality and seahorse densities reveal some of the most degraded coral reefs in the world. Abiotic structure dominated the fishing grounds: 69% of the benthos comprised rubble (32%), sand/silt (2…	0	https://doi.org/10.1016/j.marpolbul.2007.04.011
234	SDG1: No Poverty	Do partial marine reserves protect reef fish assemblages?	0	Fish assemblages in the Mimiwhangata Marine Park, an area closed to commercial fishing but open to most forms of recreational fishing, were compared with adjacent fished areas. Two survey methodologies were used; baited underwater video and underwater visual census. Snapper (Pagrus auratus), the most heavily targeted fish species in the region, showed no difference in abundance or size between th…	0	https://doi.org/10.1016/S0006-3207(03)00183-6
235	SDG1: No Poverty	Evaluating the Fit of Co-management for Small-Scale Fisheries Governance in Timor-Leste	1	Fisheries co-management is an increasingly globalized concept, and a cornerstone of the Voluntary Guidelines for Securing Sustainable Small-scale Fisheries in the Context of Food Security and Poverty Eradication, adopted by the United Nations Food and Agriculture Organization member states in 2014. Timor-Leste is a politically young country in the relatively rare position of having underexploited…	1	https://doi.org/10.3389/fmars.2019.00392
236	SDG1: No Poverty	Using local user perceptions to evaluate outcomes of protected area management in the Sagay Marine Reserve, Philippines	1	Local user perceptions of resource trajectory and indicators of protected area outcomes can be useful in the assessment of integrated conservation projects, both marine and terrestrial. In-depth stakeholder surveys using 12 performance indicators were used to evaluate the perceived outcomes of the Sagay Marine Reserve (SMR), the Philippines. These indicators were a measure of whether the SMR had …	1	https://doi.org/10.1017/S0376892904001377
237	SDG1: No Poverty	An assessment of the recreational and commercial skiboat fishery in the Transkei	0	A survey of the recreational and commercial skiboat linefishery in the Transkei was conducted from March 1997 to April 1999. Effort by commercial skiboats was substantially higher than by recreational skiboats, and catch rates on commercial boats were much higher than rates on recreational boats. Catch rates in the region were not greater than those in the adjoining provinces of KwaZulu-Natal and…	0	https://doi.org/10.2989/18142320309504001
238	SDG1: No Poverty	Planning Marine Reserve Networks for Both Feature Representation and Demographic Persistence Using Connectivity Patterns	0	Marine reserve networks must ensure the representation of important conservation features, and also guarantee the persistence of key populations. For many species, designing reserve networks is complicated by the absence or limited availability of spatial and life-history data. This is particularly true for data on larval dispersal, which has only recently become available. However, systematic co…	0	https://doi.org/10.1371/journal.pone.0154272
239	SDG1: No Poverty	Linking marine biodiversity conservation and poverty alleviation: A case study in selected rural communities of Sagay Marine Reserve, Negros Occidental	1	Marine biodiversity has long been known to provide benefits to the community. However, whether biodiversity conservation has contributed to poverty alleviation remained unclear. This paper investigated the relationship between conservation and poverty alleviation in Sagay Marine Reserve. It specifically looked at the perceived poverty alleviation of poor coastal communities in Brgy. Bulanon. The …	1	https://doi.org/10.1016/j.marpol.2019.02.015
240	SDG1: No Poverty	Illegal shark fishing in the Galapagos Marine Reserve	0	Illegal shark fishing is thought to occur globally, including within so-called shark sanctuaries, marine reserves and even inside UNESCO World Heritage sites, such as the Galapagos Islands. Presumably, this is due to poor local enforcement coupled with the growing international demand (and high economic incentives) for shark and other wildlife products. Understanding illegal shark fishing practic…	0	https://doi.org/10.1016/j.marpol.2012.12.005
241	SDG1: No Poverty	Evaluations of marine reserves as basis to develop alternative livelihoods in coastal areas of the Philippines	0	The 11 marine reserves along the Leyte Gulf, Eastern Samar, Philippines were quantified in terms of reef slope composition, hard coral coverage and standing fish biomass by manta tow and transect dive survey from 1998 to 1999. Based on the assessed ecological conditions (Condition Index, CI; Coral Coverage Index, CCI; Reef Condition Index, RCI; Fish Biomass) and derived ranking, suitable small-sc…	0	https://doi.org/10.1023/A:1023955626357
242	SDG1: No Poverty	Spillover Effects of a Community-Managed Marine Reserve	0	The value of no-take marine reserves as fisheries-management tools is controversial, particularly in high-poverty areas where human populations depend heavily on fish as a source of protein. Spillover, the net export of adult fish, is one mechanism by which no-take marine reserves may have a positive influence on adjacent fisheries. Spillover can contribute to poverty alleviation, although its ef…	0	https://doi.org/10.1371/journal.pone.0111774
243	SDG1: No Poverty	A multi-scale biophysical model to inform regional management of coral reefs in the western Philippines and South China Sea	0	The health and functioning of coral reef ecosystems worldwide is in decline, and in the face of increasing anthropogenic stress, the rate of decline of these important ecosystems is set to accelerate. Mitigation strategies at regional scales are costly, but nevertheless critical, as reef systems are highly connected across regions by ocean transport of both larval propagules and pollutants, It is…	0	https://doi.org/10.1016/j.envsoft.2010.03.033
244	SDG1: No Poverty	Hydrodynamic decoupling of recruitment, habitat quality and adult abundance in the Caribbean spiny lobster: source-sink dynamics?	0	Marine species possess dispersive stages that interconnect subpopulations, which may inhabit 'source' and 'sink' habitats, where reproduction and emigration either exceed or fall short of mortality and immigration, respectively, Postlarval supply, juvenile density and adult abundance of the Caribbean spiny lobster, Panulirus argus, were measured at four widely separated sites spanning >100 km in …	0	https://doi.org/10.1071/MF97194
245	SDG1: No Poverty	Role of an estuarine fisheries reserve in the production and export of ichthyoplankton	0	By protecting mature fishes, marine reserves are anticipated to increase local production of ichthyoplankton, a mechanism difficult to empirically demonstrate in most coastal settings. The estuarine fisheries reserve at Kennedy Space Center (KSC), Florida, is microtidal and largely isolated from public-access areas by natural shorelines and earthen causeways, conditions which help preserve spatia…	0	https://doi.org/10.3354/meps07324
246	SDG1: No Poverty	Selecting marine reserves using habitats and species assemblages as surrogates for biological diversity	0	We compare the value of using habitat categories and species assemblages as surrogates for marine biological diversity in the context of choosing a set of representative areas for a marine reserve network. Habitat categories were based on interpretation of aerial photographs and maps, and on local knowledge. Species assemblages were created from comprehensive survey data on 977 taxa (mainly speci…	0
247	SDG1: No Poverty	Importance of Protected Areas in Coastal and Marine Conservation: A Case Study from North Lebanon	0	Establishing a marine reserve constitutes one of the most important objectives for the conservation of marine environment and protection of the marine life. Palm Islands situated north Lebanon was declared as National Reserve by an official Declaration law in 1992. These three uninhabited small rocky islands situated at 6 miles offshore Al-Mina-Tripoli, constitute the only insular reserve on the …	0
248	SDG1: No Poverty	Managing for extinction? Conflicting conservation objectives in a large marine reserve	0	Establishment of the Papahanaumokuakea Marine National Monument (PMNM) in 2006 was heralded as a major advance for marine conservation. The PMNM is one of the largest no-take marine reserves in the world (36,207,439 hectares) and includes all of the Northwestern Hawaiian Islands (NWHI). Despite the protection, within its boundaries one of Hawaii's most charismatic marine species, the endemic Hawa…	0	https://doi.org/10.1111/j.1755-263X.2011.00197.x
249	SDG1: No Poverty	Spatio-Temporal Declines in Philippine Fisheries and its Implications to Coastal Municipal Fishers' Catch and Income	1	The problem of overexploitation in global fisheries is well-recognized. However, published assessment of fisheries spatio-temporal trends at the national scale is lacking for many high biodiversity developing countries, which is problematic since fisheries management is often implemented at the local or national levels. Here, we present the long-term spatio-temporal trends of Philippine fisheries…	1	https://doi.org/10.3389/fmars.2016.00021
250	SDG1: No Poverty	Effects of supplementary feeding and artificial twinning on nestling growth and survival in Australasian Gannets (Morus serrator)	0	The effect of supplementary feeding and artificial twinning on nestling growth and survival in Australasian Gannets (Morus serrator) breeding at Pope's Eye Marine Reserve in Port Phillip Bay, Victoria, was investigated in 1997-98 and 1998-99. Australasian Gannets were capable of raising additional young; however, twin young were generally of poorer quality, had slower development, attained lower …	0	https://doi.org/10.1071/MU00012
251	SDG1: No Poverty	Observations of mesoscale movements in the short-tailed stingray, Dasyatis brevicaudata from New Zealand using a novel PSAT tag attachment method	0	Short-tailed stingrays (Dasyatis brevicaudata) are the largest stingrays in the world. They are common in New Zealand waters and aggregate seasonally in large numbers at the Poor Knights Islands Marine Reserve (PKMR), where they are a major attraction. Pop-up satellite archival tags (PSAT) were attached to two female short-tailed stingrays at two New Zealand offshore islands (within and nearby th…	0	https://doi.org/10.1016/j.jembe.2008.02.024
252	SDG1: No Poverty	Transition from low to high data richness: An experiment in ecosystem-based fishery management from California	0	Fisheries can cause major impacts on ecosystems, but the goal of managing them sustainably requires more and different information than we now have. Few fisheries have the legal mandate for ecosystem-based management or to apply precautionary management when information is lacking, so fishermen have little incentive to demand improved information. The California Marine Life Management Act of 1998…	0
253	SDG1: No Poverty	Effects of Management Tactics on Meeting Conservation Objectives for Western North American Groundfish Fisheries	0	There is considerable variability in the status of fish populations around the world and a poor understanding of how specific management characteristics affect populations. Overfishing is a major problem in many fisheries, but in some regions the recent tendency has been to exploit stocks at levels below their maximum sustainable yield. In Western North American groundfish fisheries, the status o…	0	https://doi.org/10.1371/journal.pone.0056684
254	SDG1: No Poverty	Mapping of ecosystem services flow in Mida Creek, Kenya	1	The concept of ecosystem services (ES) and its application in natural resources management decision making is a new conservation paradigm. A better understanding of ES in resource-rich developing countries can contribute to poverty alleviation and sustainable development, while at the same time conserving natural resources. This study assessed the flow of ES in Mida Creek, a marine reserve in Ken…	1	https://doi.org/10.1016/j.ocecoaman.2017.02.013
255	SDG1: No Poverty	Small-scale innovations in coastal communities: shell-handicraft as a way to empower women and decrease poverty	1	We analyzed the potential of small-scale innovations, such as shell-handicraft, as a way to foster transformation toward sustainability, decrease poverty, and increase women's empowerment in Zanzibar, Tanzania. The shell-handicraft project was founded by USAID in 2006 and was introduced as an alternative livelihood to low-paid seaweed farming and invertebrate harvesting activities. The main objec…	1	https://doi.org/10.5751/ES-10136-230234
256	SDG1: No Poverty	Combining optical and acoustic data to enhance the detection of Caribbean forereef habitats	0	Maps of coral reef habitats are fundamental tools for reef management, and high map accuracy is desirable to support appropriate decisions, such as the stratification of marine reserves by habitat class. While satelite sensors have been used to map different reef communities, the accuracy of these maps tends to be low (overall accuracy<50%) and optical airborne methods with high spectral resoluti…	0	https://doi.org/10.1016/j.rse.2010.06.012
257	SDG1: No Poverty	Where did all the coal gas go?	0	Isotopic models indicate that reservoired gases in mid-Norway were generated predominantly from marine source rocks, despite the presence of abundant mature coal and terrestrial carbonaceous shales in the Are Formation. There are at least three different possible explanations as to why this may be the case: (i) source models for gas from coals are not valid; (ii) modification of the carbon isotop…	0	https://doi.org/10.1016/S0146-6380(02)00214-0
258	SDG1: No Poverty	Artisanal longline fishing the Galapagos Islands -effects on vulnerable megafauna in a UNESCO World Heritage site	0	Marine megafauna (elasmobranchs, marine mammals, turtles, and seabirds) are important ecologically and economically because many species often occupy upper trophic levels as adults and are essential for marine-based tourism in many areas of the world. This group of species is also heavily impacted by fishing because most have late sexual maturity, longevity, and low reproductive output, which aff…	0	https://doi.org/10.1016/j.ocecoaman.2019.104995
259	SDG1: No Poverty	A framework of lessons learned from community-based marine reserves and its effectiveness in guiding a new coastal management initiative in the Philippines	1	Community-based coastal resource management has been widely applied within the Philippines. However, small-scale community-based reserves are often inefficient owing to management inadequacies arising because of a lack of local support or enforcement or poor design. Because there are many potential pitfalls during the establishment of even small community-based reserves, it is important for coast…	1	https://doi.org/10.1007/s00267-004-0149-z
260	SDG1: No Poverty	Small-scale patterns of sponge biodiversity (Porifera) on Sunshine Coast reefs, eastern Australia	0	Ten reefs off the Sunshine Coast, south-eastern Queensland (26.2-26.8degreesS, 153.2degreesE), Australia, were sampled from 1991 to 2000. They were found to contain a rich fauna of 247 species of marine sponges (Porifera) in 97 genera, 44 families and 14 orders, with 51% of species not yet recorded elsewhere from the Indo-west Pacific, representing a highly unique fauna in this biogeographic tran…	0	https://doi.org/10.1071/IS02015
261	SDG1: No Poverty	Promoting restoration of fish communities using artificial habitats in coastal marinas	0	Rapid urbanization has become an area of crucial concern in conservation, owing to urban infrastructure impacts on natural ecosystems. Urban infrastructures are often poor surrogates for natural habitats, and a diversity of eco-engineering approaches has been trialed to enhance their ecological value. Marinas are among the most common human-made infrastructures found on the shoreline, and cause s…	0	https://doi.org/10.1016/j.biocon.2018.01.013
262	SDG1: No Poverty	Fish community and single-species indicators provide evidence of unsustainable practices in a multi-gear reef fishery	0	Using information on the species composition and length-frequencies of fish caught in the spear and hook and line fisheries of Glover's Reef Marine Reserve, Belize, we evaluated changes between 20042010 and 20112017 in single-species and ecosystem sustainability indicators. The two gears differed in species caught, and both changed species composition between time periods, with the line fishers t…	0	https://doi.org/10.1016/j.fishres.2018.07.003
263	SDG1: No Poverty	Effects of marine reserves on the reproductive biology and recruitment rates of commonly and rarely exploited limpets	0	We tested the effects of marine reserve status on the reproductive biology and recruitment rates of two commonly exploited (Helcion concolor, Scutellastra longicosta) and two rarely exploited (Cellana capensis, Scutellastra granularis) limpet species using two reserve and two non-reserve sites on the south coast of South Africa. Because densities of commonly exploited species are lower outside re…	0	https://doi.org/10.2989/1814232X.2016.1255255
264	SDG1: No Poverty	Establishing baselines for recovery in a marine reserve (Poor Knights Islands, New Zealand) using local ecological knowledge	0	Local ecological knowledge is a potentially valuable, but mostly untapped, resource for evaluating decadal-scale shifts in abundances of organisms. In this study, recollections of long-term divers were quantified to assess changes in underwater life at the Poor Knights Islands in temperate northeastern New Zealand from the 1960s to 2000s, in order to establish baselines for recovery since the isl…	0	https://doi.org/10.1016/j.biocon.2011.09.009
265	SDG1: No Poverty	No 'silver bullet': Multiple factors control population dynamics of European purple sea urchins in Lough Hyne Marine Reserve, Ireland	0	Two-decade-long monitoring studies at Europe's first statutory marine reserve-Lough Hyne in SW Ireland-indicate that benthic communities are rapidly changing. Populations of the ecologically important purple urchin (Paracentrotus lividus) have fluctuated widely, most recently with a population boom in the late 1990s, followed by a mass mortality that persists to the present day. Eight general hyp…	0	https://doi.org/10.1016/j.ecss.2019.106271
266	SDG1: No Poverty	FACTORS PREVENTING THE RECOVERY OF A HISTORICALLY OVEREXPLOITED SHELLFISH SPECIES, OSTREA LURIDA CARPENTER 1864	0	The Olympia oyster, Ostrea lurida Carpenter 1864,dagger in estuaries along the Pacific coast of North America, experienced overexploitation throughout its range in the late 1800s, resulting in commercial extinction before 1930. Significant harvest restrictions and marine reserves were established in Washington State by 1897 to protect new recruits, and harvest pressure has been negligible for the…	0	https://doi.org/10.2983/035.028.0116
267	SDG1: No Poverty	Long-term trends in catch and effort of commercial linefish off South Africa's Cape Province: Snapshots of the 20(th) century	0	The Cape commercial linefishery, established during the first half of the 19(th) century, currently consists of about 2 500 vessels (+/- 20 000 crew), which land some 15 500 tons of fish each year. In spite of a long history, a lack of a long-term catch and effort data series has severely hindered the management of the fishery. This paper provides commercial catch and effort data for three period…	0	https://doi.org/10.2989/025776100784125663
268	SDG1: No Poverty	Catalyzing sustainable fisheries management through behavior change interventions	1	Small-scale fisheries are an important livelihood and primary protein source for coastal communities in many of the poorest regions in the world, yet many are overfished and thus require effective and scalable management solutions. Positive ecological and socioeconomic responses to management typically lag behind immediate costs borne by fishers from fishing pressure reductions necessary for fish…	1	https://doi.org/10.1111/cobi.13475
269	SDG1: No Poverty	Assessing and managing data-limited ornamental fisheries in coral reefs	0	Coral reefs support numerous ornamental fisheries, but there are concerns about stock sustainability due to the volume of animals caught. Such impacts are difficult to quantify and manage because fishery data are often lacking. Here, we suggest a framework that integrates several data-poor assessment and management methods in order to provide management guidance for fisheries that differ widely i…	0	https://doi.org/10.1111/faf.12040
270	SDG1: No Poverty	Diet and condition of mesopredators on coral reefs in relation to shark abundance	0	Reef sharks may influence the foraging behaviour of mesopredatory teleosts on coral reefs via both risk effects and competitive exclusion. We used a natural experiment to test the hypothesis that the loss of sharks on coral reefs can influence the diet and body condition of mesopredatory fishes by comparing two remote, atoll-like reef systems, the Rowley Shoals and the Scott Reefs, in northwester…	0	https://doi.org/10.1371/journal.pone.0165113
271	SDG1: No Poverty	Fishery recovery in a coral-reef marine park and its effect on the adjacent fishery	1	Numbers of fish and their wet weights were estimated in Kenyan coral-reef lagoons on seven reefs over 6 years. Two sites were protected from fishing for over 20 years, whereas the other five sites were heavily fished in recent years. A heavily fished site was converted into a marine park (Mombasa Marine National Park, approximately 10km(2), no fishing allowed), and the number of fishers allowed w…	1	https://doi.org/10.1046/j.1523-1739.1996.10041187.x
272	SDG1: No Poverty	Fish populations forming transient spawning aggregations: should spawners always be the targets of spatial protection efforts?	0	Many coral reef fish form transient spawning aggregations at sites located a few to hundreds of kilometres from their normal residence areas. Reef fish spawning aggregations (FSAs) are often heavily exploited, which make them targets for management with marine reserves. We used a per-recruit model to compare the long-term conservation (impacts on female spawning-stock biomass-per-recruit (SSBR) a…	0	https://doi.org/10.1093/icesjms/fsu139
273	SDG1: No Poverty	Evidence for spillover of reef fishes from a no-take marine reserve: An evaluation using the before-after control-impact (BACI) approach	0	No-take marine reserves (NTRs) may promote recovery of exploited populations within their boundaries and spillover offishes to adjacent fishing grounds, thus potentially benefiting the local fisheries. Although some Studies have measured spillover by examining gradients of fish abundance and body size across reserve boundaries, there are no such Studies to date including information from before r…	0	https://doi.org/10.1016/j.fishres.2008.06.011
274	SDG1: No Poverty	Reserve site selection for data-poor invertebrate fisheries using patch scale and dispersal dynamics: a case study of sea cucumber (Cucumaria frondosa)	0	Globally, management decisions for recently established invertebrate fisheries are based on limited information. The negative consequences are being realized as now at least one-third of invertebrate fisheries are over-exploited, collapsed or closed. Management of a fishery should be based on abundance and productivity data. This information is often unavailable but in some jurisdictions, spatial…	0	https://doi.org/10.1002/aqc.2369
275	SDG1: No Poverty	Quality standard codes of reference of Jordanian coastal waters of the Gulf of Aqaba, Red Sea	0	Back in 1992, the Gulf of Aqaba Environmental Action Plan (GAEAP), a collaboration between the Aqaba Region Authority (ARA), Jordan and the World Bank, gave considerable emphasis to the environmental protection of the Gulf of Aqaba [The World Bank. Gulf of Aqaba Environmental Action Plan. Report No. 12244JO (1993).]. The document recommended the establishment of a marine reserve and the long term…	0	https://doi.org/10.1080/02757540500258831
276	SDG1: No Poverty	Growth parameter k and location affect body size responses to spatial protection by exploited rockfishes	0	For many fish taxa, trophic position and relative fecundity increase with body size, yet fisheries remove the largest individuals, altering food webs and reducing population productivity. Marine reserves and other forms of spatial protection can help mitigate this problem, but the effectiveness of these management tools may vary interspecifically and spatially. Using visual survey data collected …	0	https://doi.org/10.7717/peerj.9825
277	SDG1: No Poverty	Diversity, dynamics and biogeography of Chilean benthic nearshore ecosystems: an overview and guidelines for conservation	0	Despite Chile has been one of the pioneering countries in studies of human impact on marine communities, and despite the enormous economic and social significance that the marine environment has for the country, the development of marine conservation programs and the scientific basis for sustainability has not kept pace, with the exploitation rate of marine fisheries and the increasing use of the…	0
278	SDG1: No Poverty	From Land to Sea: The Role of Land Trusts in Marine Protection	0	Many policymakers conclude that marine conservation strategies are limited when compared to land protection tools. Limitations are described as resulting from institutional differences between land and sea resources such as the lack of private ownership in the sea, and differences in physical characteristics such as the fluid nature of marine resources. Despite these differences, some trends in l…	0	https://doi.org/10.1080/08941920801942024
279	SDG1: No Poverty	The Ocean is our Farm: Marine Conservation, Food Insecurity, and Social Suffering in Southeastern Tanzania	1	This paper examines the social impact of a large-scale marine conservation project (Marine Park) in the coastal region of Mtwara, southeastern Tanzania, following displacement and the enforcement of restrictions on fishing and extracting marine resources. Through an analysis of interviews and focus group discussions with residents in six villages, the paper illustrates how the undesired effects o…	1	https://doi.org/10.17730/humo.73.3.f43k115544761g0v
280	SDG1: No Poverty	FACTORS INFLUENCING RESIDENTS' ATTITUDE TOWARDS MARINE RESOURCE UTILIZATION IN TUN SAKARAN MARINE PARK, MALAYSIA	1	Communities living in the Tun Sakaran Marine Park (TSMP) depend on the marine resources for their livelihood. The marine park is managed by state government, the Sabah Parks, with the main objective of conserving the high marine biodiversity in the area. The communities living in the area use the resources on a daily basis, for family consumption and subsistence. The marine park is also popular f…	1
281	SDG1: No Poverty	Coral Reef Fisheries Resource Management In Taka Bonerate National Park Based On Constructionism Perspective	1	This paper is aimed at exploring the complexity of fishery resource use of Taka Bonerate coral reef zone from the past to the present when it has become a National Sea Park. The complexity of phenomena comprises dimensions of diversity and variation of technology, change and continuity, types of ideological interaction with environment, involvement of both internal and external stakeholders with …	1
282	SDG1: No Poverty	Spatial inequalities leave micropolitan areas and Indigenous populations underserved by informal STEM learning institutions	0	Informal learning institutions (ILIs) create opportunities to increase public understanding of science and promote increased inclusion of groups underrepresented in Science, Technology, Engineering, and Math (STEM) careers but are not equally distributed across the United States. We explore geographic gaps in the ILI landscape and identify three groups of underserved counties based on the interac…	0	https://doi.org/10.1126/sciadv.abb3819
283	SDG1: No Poverty	KEEPING THE BAY IN GLACIER BAY NATIONAL PARK: INTRODUCING GLACIER SCIENCE TO THE UNITED STATES SUPREME COURT	0	In 2000, seventy-five years after the founding of Glacier Bay National Monument, the United States Supreme Court authorized the State of Alaska to begin legal proceedings related to the ownership of 'certain marine submerged lands in southeast Alaska' including the submerged lands contained within what is now Glacier Bay National Park. This narrative presents a summary of how glacier science (gla…	0	https://doi.org/10.17704/1944-6178-36.2.359
284	SDG1: No Poverty	Modelling distribution of marine benthos from hydroacoustics and underwater video	0	Broad-scale mapping of marine benthos is required for marine resource management and conservation. This study combines textural derivatives based on bathymetry from multibeam hydroacoustics with underwater video observations to model and map sessile biota between 10- and 60-m water depth over 35 km(2) in Point Addis Marine National Park (MNP), Vic., Australia. Classification tree models and maps …	0	https://doi.org/10.1016/j.csr.2008.04.016
285	SDG1: No Poverty	Parasite communities of eels Anguilla anguilla in freshwater and marine habitats in Iceland in comparison with other parasite communities of eels in Europe	0	Ninety-five eels from one marine and three freshwater localities in Iceland were examined for parasites. Twenty species were found, 12 from marine habitat, 12 from freshwater and 4 species were found in both habitats. These are: Eimeria anguillae, Chilodonella hexasticha, Trichodina fultoni, T. jadranica, Myxidium giardi, Myxobolus kotlani, two Zschokkella spp., Derogenes varicus, Deropristis inf…	0	https://doi.org/10.14411/fp.2007.019
286	SDG1: No Poverty	Market feasibility of a water trail	0	This feasibility study examines the implications of the creation of a water trail in Bruce Peninsula National Park and Fathom Five National Marine Park. Modern water trails have been increasing in popularity since the middle of the 1980s. Water trail associations were surveyed to compile a database of their current status, and predicted trends including: association growth, volunteer and associat…	0
287	SDG1: No Poverty	Public awareness and attitudes towards marine protection in the United Kingdom	0	Public perception research evaluating awareness and attitudes towards marine protection is limited in the United Kingdom (UK) and worldwide. Given public opinion can help drive policy and affect its successful delivery we conducted nationwide surveys in 2005, 2010 and 2015 to assess public knowledge of UK (England, Scotland and Wales) sea 'health' and management. Respondents from all three survey…	0	https://doi.org/10.1016/j.marpolbul.2016.07.003
288	SDG1: No Poverty	Establishing representative no-take areas in the Great Barrier Reef: Large-scale implementation of theory on marine protected areas	0	The Great Barrier Reef Marine Park, an area almost the size , of Japan, has a new network of no-take areas that significantly improves the protection of biodiversity. The new marine park zoning implements, in a quantitative manner, many of the theoretical design principles discussed in the literature. For example, the new network of no-take areas has at least 20% protection per bioregion, minimum…	0	https://doi.org/10.1111/j.1523-1739.2005.00302.x
289	SDG1: No Poverty	Differences in perception of a newly created Marine Park in south-west Western Australia by boat -based recreational fishers and the broader community	0	Community acceptance of Marine Parks is widely acknowledged as being critical for success. Where community stewardship and voluntary compliance have been achieved, there are fewer issues with non-compliance of zoning regulations. Probability-based surveys that are representative of the wider community can improve understanding of community perceptions prior to and following establishment of Marin…	0	https://doi.org/10.1016/j.marpol.2016.12.012
290	SDG1: No Poverty	Using conservation as a tool to resolve conflict: Establishing the Piran-Savudrija international Marine Peace Park	0	Border disputes between neighbouring States are a regular occurrence and have the potential to undermine relations at national, regional, local and even individual level. In this instance the conflict over Piran Bay in the Northern Adriatic Sea has led to conflict between the neighbouring States of Croatia and Slovenia. The lack of resolution of this conflict resulted in Croatia being delayed in …	0	https://doi.org/10.1016/j.marpol.2012.10.001
291	SDG1: No Poverty	Marine spatial planing and the Great Barrier Reef Marine Park Act 1975: An evaluation	0	The Great Barrier Reef is internationally recognised for its natural and heritage value. Australian Government established the Great Barrier Reef Marine Park under the Great Barrier Reef Marine Park Act, 1975. The Act provides a legal regime for the protection of the natural and heritage values of the Reef. The Act incorporated spatial zoning and Marine Spatial Planning (MSP) to achieve the objec…	0	https://doi.org/10.1016/j.ocecoaman.2018.10.015
292	SDG1: No Poverty	Conservation and management of ecosystems within and without protected natural areas, Baja California, Mexico	0	Mexico has several ways of preserving flora and fauna, depending on geographical scale and land ownership. Until recently, fifty percent of the land was common property called ejidos,(2) which denotes communal land and protected areas. Wildlife management and natural resources conservation practices occur in these types of land tenure. There is a gradient of land use intensities, from cities and …	0
293	SDG1: No Poverty	Monthly and Quarterly Sea Surface Temperature Prediction Based on Gated Recurrent Unit Neural Network	0	The sea surface temperature (SST) is an important parameter of the energy balance on the Earth's surface. SST prediction is crucial to marine production, marine protection, and climate prediction. However, the current SST prediction model still has low precision and poor stability. In this study, a medium and long-term SST prediction model is designed on the basis of the gated recurrent unit (GRU…		https://doi.org/10.3390/jmse8040249
294	SDG1: No Poverty	Fragmented integration in the Singapore-Indonesian border zone: Southeast Asia's 'growth triangle' against the global economy	1	Singapore-Indonesian investment cooperation in the Riau islands forms the key part of an initiative in cross-border cooperation including Indonesia, Malaysia and Singapore. Four flagship projects - Batamindo Industrial Park, Bintan Industrial Estate, Bintan Beach International Resort, and the Karimun marine and industrial complex - are a key test of the effectiveness of a development strategy tha…	1	https://doi.org/10.1111/1468-2427.00197
295	SDG1: No Poverty	Differences in livelihoods, socioeconomic characteristics, and knowledge about the sea between fishers and non-fishers living near and far from marine parks on the Kenyan coast	1	The socioeconomic conditions in nine communities of the Kenyan coast were examined to test the hypotheses that socioeconomic characteristics and knowledge about the sea differ for: (1) fishers compared to non-fishers; and (2) fishers living adjacent to parks compared to fishers living away from parks. Compared to non-fishers, fishers were poorer, had higher occupational diversity, more participat…	1	https://doi.org/10.1016/j.marpol.2009.04.003
296	SDG1: No Poverty	Parangtritis Geomaritime Science Park: One Step Ahead Geospatial Documentation Center for Yogya Bahari	1	This study examines the importance of documentation center as a first step to strengthen the maritime culture in Indonesia. The Indonesian maritime culture slowly erodes because of the development that is more focused on mainland sector. One of the causes is the lack of documentation of the maritime potential of Indonesia. One area of promising maritime resources is Yogyakarta. Turn the steering …	1	https://doi.org/10.1166/asl.2017.10351
297	SDG1: No Poverty	Strategic management of marine ecosystems using whole-ecosystem simulation modelling: The 'back to the future' policy approach	0	'Back-to-the-Future' (BTF) attempts to solve the 'fisheries crisis' by using past ecosystems as policy goals for the future. BTF provides an integrative approach to the strategic management of marine ecosystems with policies based on restoration ecology, and an understanding of marine ecosystem processes in the light of findings from terrestrial ecology. BTF employs recent developments in whole e…
298	SDG1: No Poverty	Cohort Description of the Madagascar Health and Environmental Research-Antongil (MAHERY-Antongil) Study in Madagascar	1	The Madagascar Health and Environmental Research-Antongil (MAHERY-Antongil) study cohort was set up in September 2015 to assess the nutritional value of seafood for the coastal Malagasy population living along Antongil Bay in northeastern Madagascar. Over 28 months of surveillance, we aimed to understand the relationships among different marine resource governance models, local people's fish catc…	1	https://doi.org/10.3389/fnut.2019.00109
299	SDG1: No Poverty	Understanding visitors' image of the oldest marine park in Africa	1	In successful tourism development and destination marketing, an important factor is individuals' tourist destination image (TDI). A review of the literature revealed a dearth of studies on the image of national parks as tourist destinations in less-developed countries (LDCs). To help alleviate this lack, visitors to the oldest marine park in Africa - the Tsitsikamma National Park (TNP) in South A…	1	https://doi.org/10.1080/13683500.2013.785481
300	SDG1: No Poverty	Visitor perceptions and the shifting social carrying capacity of south sinai's coral reefs	0	To investigate how the perceptions and behaviour of visitors to coral reefs are influenced by their prior experience and knowledge of marine life, a questionnaire-based study was undertaken at sites in the Ras Mohammed National Park and at Sharm El Sheikh, South Sinai, Egypt. It was evident that over the 10-20 years during which these reefs have deteriorated (mainly due to reef-flat trampling), t…		https://doi.org/10.1007/s00267-006-0040-1
301	SDG1: No Poverty	Retrieving key benthic cover types and bathymetry from hyperspectral imagery	0	Bathymetry and the spatial distribution of benthic cover in coastal waters are of key importance in managing and monitoring our coastal water environments. Currently very little of the Western Australian shallow coastal water habitats are mapped, and for those maps that do exist, the spatial resolution generally is poor and the information is dated. Aircraft and space-borne hyperspectral sensors …		https://doi.org/10.1117/1.2816113
302	SDG1: No Poverty	The sea cucumber fishery in Australia's Great Barrier Reef Marine Park follows global patterns of serial exploitation	0	Tropical sea cucumber fisheries follow a predictable pattern of serial depletion. Overfishing is exacerbated in developing countries where management systems lack capacity to control large numbers of fishers influenced by poverty. In contrast, the tropical sea cucumber fishery in Australia's World Heritage listed Great Barrier Reef Marine Park (GBRMP) is operating in a developed high-income count…	0	https://doi.org/10.1111/faf.12059
303	SDG1: No Poverty	A rare, late Paleocene molluscan faunule from the Kings Park Formation, Perth Basin, Western Australia	0	A shallow marine faunule of eight taxa front the Kings Park Formation of the Perth Basin is the first described Paleocene molluscan assemblage from Western Australia. These species are part of a depauperate Suite of macroinvertebrates (molluscs, echinoids and corals) derived from deep, onshore caissons in Perth and are inferred to be late Paleocene in age, based on planktonic foraminiferal biostr…		https://doi.org/10.1080/03115510508619309
304	SDG1: No Poverty	Terrestrial evidence for the Lilliput effect across the Cretaceous-Paleogene (K-Pg) boundary	0	Recent research has demonstrated that the Lilliput effect (reduction of body size in biota associated with the aftermath of mass extinctions) affected all trophic levels in the marine realm following the Cretaceous-Paleogene (K-Pg) event. However, it is unclear if this size change was strictly a marine signal, or a global phenomenon that also affected continental ecosystems. Herein we present the…	0	https://doi.org/10.1016/j.palaeo.2017.12.005
305	SDG1: No Poverty	Analysis of the impact of prawn trawling on benthic species in the Great Barrier Reef Marine Park	0	Prawn trawling is a major fishing activity in the Great Barrier Reef Marine Park, generating millions of dollars for the Australian economy. It is important that appropriate management decisions are made to ensure the sustainability of the industry. An experimental study was conducted to quantify the recovery of seabed fauna after repeated trawling. Data from the study were composed of counts of …	0	https://doi.org/10.1002/env.663
306	SDG1: No Poverty	Why would would new protected areas be accepted or rejected by the public?: Lessons from an ex-ante evaluation of the new Patagonia Park Network in Chile	0	Social support is one of the key factors that determines the success of protected areas. An ex-ante evaluation of the social support regarding the establishment process of protected areas could facilitate a more effective formation and hence improved management of such areas. Public backing for new parks could depend on several factors, including relationships with already established protected a…	0	https://doi.org/10.1016/j.landusepol.2019.104248
307	SDG1: No Poverty	Developing economic indices to assess the human dimensions of the South Florida coastal marine ecosystem services	0	Resource managers in South Florida are aware that coastal and marine ecosystems provide food, recreation, and a quality of life that are highly-valued by humans. Estimates of economic values in Florida, such as willingness-to-pay for a day of coral reef snorkeling or the change in this value from a change in coral cover, are not updated in a timely manner or are not available at all. Usually thes…	0	https://doi.org/10.1016/j.ecolind.2014.04.014
308	SDG1: No Poverty	Overlapping faults and their effect on fluid flow in different reservoir types: A LIDAR-based outcrop modeling and flow simulation study	0	In this article we focus on the potential of fault-overlap zones as conduits for fluid flow in a variety of reservoir types. Light detection and ranging (LIDAR) technology were applied to collect a three-dimensional, spatially constrained data set from a well-exposed fault-overlap zone that crops out in the Devil's Lane area of the Canyonlands National Park in Utah. A virtual outcrop was generate…		https://doi.org/10.1306/09300807092
309	SDG1: No Poverty	An assessment of land management practices that benchmark water quality targets set at a Neighbourhood Catchment scale using the SWAT model.	0	The Great Barrier Reef Marine Park Authority has estimated that pollutant loads discharging into the Great Barrier Reef World Heritage Area have increased 300-900% since c 1850, impacting negatively on the health of the reef and its associated industries. The authority has suggested that sediment and phosphorus levels should be halved and nitrogen be reduced by a third by 2011. Under the National…	0
310	SDG1: No Poverty	Water quality indicators of coastal lagoons with toursim influence: Cozumel and Isla Mujeres, Quintana Roo, Mexico	0	The feasibility of recreational use of Laguna Colombia (LC) within the National Marine Park Arrecifes de Cozumel, and Laguna Macax (LM), within the natural protected area of Costa Occidental in Quintana Roo was surveyed using physical and chemical indicators of water quality. Activities related to nature observation are currently carried out, but the feasibility to support direct contact recreati…	0
311	SDG1: No Poverty	Ecosystem health of the Great Barrier Reef: Time for effective management action based on evidence	0	The Great Barrier Reef (GBR) is a World Heritage site off the north-eastern coast of Australia. The GBR is worth A$ 15-20 billion/year to the Australian economy and provides approximately 64,000 full time jobs. Many of the species and ecosystems of the GBR are in poor condition and continue to decline. The principal causes of the decline are catchment pollutant runoff associated with agricultural…	0	https://doi.org/10.1016/j.ecss.2016.05.008
312	SDG1: No Poverty	From science to action: Principles for undertaking environmental research that enables knowledge exchange and evidence-based decision-making	0	Effective conservation requires knowledge exchange among scientists and decision-makers to enable learning and support evidence-based decision-making. Efforts to improve knowledge exchange have been hindered by a paucity of empirically-grounded guidance to help scientists and practitioners design and implement research programs that actively facilitate knowledge exchange. To address this, we eval…	0	https://doi.org/10.1016/j.jenvman.2016.09.038
313	SDG1: No Poverty	Scleractinian settlement patterns to natural cleared reef substrata and artificial settlement panels on an Indonesian coral reef	0	Recruitment is a key factor driving the population dynamics of scleractinian corals, but despite its importance, we still have a poor understanding of recruitment processes in the Coral triangle region, which contains the most biodiverse marine ecosystems in the world. This study aimed to compare settlement rates to artificial settlement panels with cleared areas of natural reef in order to asses…		https://doi.org/10.1016/j.ecss.2011.02.016
314	SDG1: No Poverty	Rules of attraction: enticing pelagic fish to mid-water remote underwater video systems (RUVS)	0	Mid-water baited remote underwater video systems (BRUVS) are becoming an increasingly popular tool for examining pelagic fish assemblages in a non-destructive, fisheries independent manner. As the technique is relatively novel, critical methodological questions such as the most appropriate attractant for pelagic fish to mid-water RUVS remain unresolved. In this study, we compared the relative eff…		https://doi.org/10.3354/meps11274
315	SDG1: No Poverty	WASTE-WATER REUSE POTENTIAL IN TURKEY - LEGAL AND TECHNICAL ASPECTS	0	Treated wastewater is one of the potential water resources in especially arid and semi and regions. Overall, Turkey is not poor in terms of water sources. However, due to distribution of water in time and in space water shortage is felt. Wastewater reuse potential is especially high during summer months for agricultural and recreational purposes.In coastal areas of Turkey treated wastewaters from…	0
316	SDG1: No Poverty	Ecosystem structure and processes at Kaloko Honokohau, focusing on the role of herbivores, including the green sea turtle Chelonia mydas, in reef resilience	0	The formal protection of the Hawaiian green turtle Chelonia mydas in the 1970s has led to significant increases in the number of individuals recorded throughout the archipelago. Reduced growth rates and poor body condition of individuals at a number of foraging sites, including Kaloko-Honokohau National Historical Park (Kaloko), suggest that some aggregations have reached carrying capacity. To be…	0	https://doi.org/10.3354/meps08846
317	SDG1: No Poverty	The nematode assemblage as a tool for the assessment of marine ecological quality status: a case-study in the Central Adriatic Sea	0	Free-living nematodes are efficiently used as bio-indicators of anthropogenic disturbance in marine ecosystems. Among various criteria, functional traits may represent useful tools for monitoring environmental impact in coastal areas. A study of nematode assemblages was carried out in three locations of the Central Adriatic Sea (Italy), one at the mouth of the Foglia River (Baia Flaminia) and two…	0	https://doi.org/10.12681/mms.366
318	SDG1: No Poverty	Diseases and compromised health states of massive Porites spp. in the Gulf of Thailand and the Andaman Sea	0	In this study, we assess coral health by detecting the severity of coral diseases and compromised health states on massive Porites. Field surveys are conducted at twenty-two sites covering the eastern, inner and western Gulf of Thailand as well as the Andaman Sea during 2010-2015. A total of nine coral diseases and signs of compromised health are observed in the waters of Thailand, consisting of …	0	https://doi.org/10.1007/s13131-019-1378-6
319	SDG1: No Poverty	The harmful effects of captivity and chronic stress on the well-being of orcas (Orcinus orca)	0	Orcas are large, deep-diving cetaceans who are known for their global distribution, wide-ranging behavior, intelligence, and social complexity. They possess one of the largest and most complex brains in the mammalian kingdom. However, they are the third most common species of cetaceans kept in aquariums and marine theme parks. Most spend many years, and sometimes decades, in captivity. At the tim…	0	https://doi.org/10.1016/j.jveb.2019.05.005
320	SDG1: No Poverty	Relationship between environmental conditions and recovery of the coral reefs in the Andaman coast of Thailand	0	The coral reef ecosystem in the Andaman sea was studied by monitoring aquatic environmental conditions and reef condition from years 2005-2009. Following the Asian tsunami in December 2004, the ammonium-nitrogen concentration in the surface water in Ranong province ranged from 8.45-14.08 mu M, while in Phang Nga area, it was between 9.99 and 25.11 mu M. Mean sea surface temperatures in Ranong and…	0	https://doi.org/10.2306/scienceasia1513-1874.2015.41.217
321	SDG1: No Poverty	River sediment supply, sedimentation and transport of the highly turbid sediment plume in Malindi Bay, Kenya	0	The paper presents results of a study on the sediment supply and movement of highly turbid sediment plume within Malindi Bay in the Northern region of the Kenya coast. The current velocities, tidal elevation, salinity and suspended sediment concentrations (TSSC) were measured in stations located within the bay using Aanderaa Recording Current Meter (RCM-9), Turbidity Sensor mounted on RCM-9, Dive…		https://doi.org/10.1007/s11442-013-1022-x
322	SDG1: No Poverty	A COMPARATIVE ANALYSIS OF THE CULTURED MICROMYCETES IN OLIGOTROPHIC PEATLANDS OF NATURAL BIOSPHERE RESERVATIONS LOCATED IN THE NORTHERN AND CENTRAL PARTS OF RUSSIA	0	The current study addresses the fungal diversity of the peatlands that vary geographically and geologically, in the central and northern parts of Russia. The central (Smolenskaya area, National Park << Smolenskoye Poozerie >>) and northern (White Sea Biological Station area) peatlands have a different geological history, the former have a glacial origin, while the latter are of marine origin. Our…
323	SDG1: No Poverty	KENYAN CORAL-REEF LAGOON FISH - EFFECTS OF FISHING, SUBSTRATE COMPLEXITY, AND SEA-URCHINS	0	Population density, number of species, diversity, and species-area relationships of fish species in eight common coral reef-associated families were studied in three marine parks receiving total protection from fishing, four sites with unregulated fishing, and one reef which recently received protection from fishing (referred to as a transition reef). Data on coral cover, reef topographic complex…		https://doi.org/10.1007/BF00303637
324	SDG1: No Poverty	Lesion regeneration rates in reef-building corals Montastraea spp. as indicators of colony condition	0	Regeneration rates of coral lesions reflect the ability of colonies to repair damage and therefore can be useful indicators of coral health and environmental conditions. We quantified regeneration rates of boulder corals Montastraea spp. at four, 6 m deep patch reefs within Biscayne National Park (BNP) and the upper Florida Keys National Marine Sanctuary (FKNMS), and along a 3 to 18 m depth trans…		https://doi.org/10.3354/meps339061
325	SDG1: No Poverty	Ecosystem Modelling Of The Great Barrier Reef: A Balanced Trophic Biomass Approach.	0	By its charter the Great Barrier Reef Marine Park Authority (GBRMPA), must balance the needs of indigenous traditional owners, commercial and recreational fishing interests, and the conservation requirements of the Great Barrier Reef (GBR) marine park's World Heritage Area status. Under both Commonwealth and State legislation, as well as through international obligations of the World Heritage Are…
326	SDG1: No Poverty	The role of biologically-enhanced pore water transport in early diagenesis: An example from carbonate sediments in the vicinity of North Key Harbor, Dry Tortugas National Park, Florida	0	Biologically enhanced pore water irrigation affects the course of early diagenesis in shallow marine sediments, as illustrated here for the carbonate sediments from North Key Harbor, Dry Tortugas National Park, Florida. Whereas macrofaunal activity at the study site extends approximately 15 cm below the water-sediment interface, measured O-2 microprofiles only show O-2 penetration to depths of a …		https://doi.org/10.1357/002224000321511124
327	SDG1: No Poverty	Identifying sources of ozone to three rural locations in Nevada, USA, using ancillary gas pollutants, aerosol chemistry, and mercury	0	Ozone (O-3) is a secondary air pollutant of long standing and increasing concern for environmental and human health, and as such, the US Environmental Protection Agency will revise the National Ambient Air Quality Standard of 75 ppbv to <= 70 ppbv. Long term measurements at the Great Basin National Park (GBNP) indicate that O-3 in remote areas of Nevada will exceed a revised standard. As part of …	0	https://doi.org/10.1016/j.scitotenv.2015.03.146
328	SDG1: No Poverty	The change in macroalgal assemblages through the Saldanha Bay/Langebaan Lagoon ecosystem (South Africa)	0	Saldanha Bay and Langebaan Lagoon form together one of the few sheltered habitats within the Benguela Marine Province; a wide gradient in environmental factors is found here. The West Coast National Park was established to protect this unique ecosystem, but at the same time an industrially expanding harbour marks this area. In an effort to understand the biological composition of the Saldanha/Lan…		https://doi.org/10.1515/BOT.2001.038
329	SDG1: No Poverty	Port Canaveral Cruise Terminal 1Berth	0	The Canaveral Port Authority has constructed Cruise Terminal 1 to accommodate the demand for home port and port-of-call berths for the largest cruise ships. The $100 million project included a 17,460 m(2) ( 188,000 sg ft) terminal building, a 1,022 car parking garage, two mobile passenger gangways, a 445 m ( 1,461 feet) long deep wall wharf, dredging with reuse of suitable spoil material, and sco…
330	SDG1: No Poverty	WATER-ROCK INTERACTIONS IN A MODERN COASTAL MIXING ZONE	0	The chemical evolution of ground water and the diagenetic history of the rocks in a modern saline-fresh-water mixing zone were investigated to test the hypothesis that this zone is a chemically active environment in which carbonate mineral diagenesis occurs, The field site was in the unconfined section of the upper Floridan aquifer system in west-central Florida, a regionally extensive hydrostrat…
331	SDG1: No Poverty	How environmental stress affects density dependence and carrying capacity in a marine copepod	0	1. Management of the effects of stress on populations - for instance in ecotoxicology - requires understanding of the effects of stressors on populations and communities. Attention to date has too rarely been directed to relevant ecological endpoints, such as carrying capacity and density dependence. Established procedures are instead based on measuring the Life Tables of individual organisms exp…		https://doi.org/10.1046/j.1365-2664.2000.00534.x
332	SDG1: No Poverty	Ambient measurements of biological aerosol particles near Killarney, Ireland: a comparison between real-time fluorescence and microscopy techniques	0	Primary biological aerosol particles (PBAPs) can contribute significantly to the coarse particle burden in many environments. PBAPs can thus influence climate and precipitation systems as cloud nuclei and can spread disease to humans, animals, and plants. Measurement data and techniques for PBAPs in natural environments at high time- and size resolution are, however, sparse, and so large uncertai…	0	https://doi.org/10.5194/acp-14-8055-2014
333	SDG1: No Poverty	Effects of wind turbines on flight behaviour of wintering common eiders: implications for habitat use and collision risk	0	1.Wind energy is a fast-growing renewable energy source and many offshore wind parks will be erected in shallow waters (< 40 m deep) where various coastal bird species are found. The two main issues regarding offshore wind farms and birds are disturbance and collision risk. We studied the effect of wind turbines on the flight behaviour of wintering common eiders Somateria mollissima in order to i…	0	https://doi.org/10.1111/j.1365-2664.2007.01303.x
334	SDG1: No Poverty	Late Paleozoic tectonics and paleogeography of the ancestral Front Range: Structural, stratigraphic, and sedimentologic evidence from the Fountain Formation (Manitou Springs, Colorado)	0	Sedimentologic, stratigraphic, and structural data indicate that the Fountain Formation at Manitou Springs consists of three tectonostratigraphic units, herein termed the lower, middle, and upper Fountain Formation. Both the lower and middle Fountain Formation were deposited in a fan-delta setting adjacent to the active ancestral Ute Pass fault. The lower is thin and predominantly characterized b…		https://doi.org/10.1130/B26554.1
335	SDG1: No Poverty	The Composition and Depositional Environments of Mesoarchean Iron Formations of the West Rand Group of the Witwatersrand Supergroup, South Africa	0	This paper documents the sedimentological setting, mineralogy, and geochemistry of several iron formation units interbedded with siliciclastic strata of the Mesoarchean Witwatersrand Supergroup, well known for its world-class conglomerate-hosted Au-U deposits. Four major iron formation beds, with associated magnetic mudstones, are present in two distinctly different lithostratigraphic association…	0	https://doi.org/10.2113/econgeo.108.1.111
336	SDG2: Zero hunger	Mainstreaming marine biodiversity into the SDGs: The role of other effective area-based conservation measures (SDG 14.5)	1	This article explores the concept of other effective area-based conservation measures (OECMs) in the context of the UN Convention on Biological Diversity (CBD) Aichi Biodiversity Target 11 on marine protected areas and OECMs and its linkages to the Sustainable Development Goals (SDGs). It argues that mainstreaming biodiversity through CBD Aichi Biodiversity Targets' implementation into the SDGs c…	1	https://doi.org/10.1016/j.marpol.2017.08.019
337	SDG2: Zero hunger	An exploration of Hul'qumi'num Coast Salish peoples' attitudes towards the establishment of no-take zones within marine protected areas in the Salish Sea, Canada	1	The Canadian Government has committed to establishing a national network of Marine Protected Areas. Progress in the Salish Sea (Strait of Georgia) of British Columbia has been slow. Opposition by First Nations is a factor as these protected areas have the potential to impact on Aboriginal rights. This case study with the Hulquminum First Nations examines their approaches to marine conservation an…	1	https://doi.org/10.1111/j.1541-0064.2012.00433.x
338	SDG2: Zero hunger	Evaluating Antarctic marine protected area scenarios using a dynamic food web model	0	Marine protected areas, especially when they are or include no-take zones, can support conservation objectives by creating an area where marine organisms are protected from human disturbances, particularly fishing. The coast of the Antarctic continent is the only habitat of the iconic Adelie penguin, whose main diet is Antarctic krill. Current threats to Adelie Penguins, other Antarctic krill pre…	0	https://doi.org/10.1016/j.biocon.2020.108766
339	SDG2: Zero hunger	The potential impacts of global climate change on marine protected areas	0	The potential effects of global climate change on marine protected areas do not appear to have been addressed in the literature. This paper examines the literature on protected areas, conservation biology, marine ecology, oceanography, and climate change, and reviews some of the relevant differences between marine and terrestrial environments. Frameworks and classifications systems used in protec…	0	https://doi.org/10.1023/A:1020364409616
340	SDG2: Zero hunger	Rule breaking and livelihood options in marine protected areas	1	Two main drivers of global trends in noncompliance of marine protected areas regulations are food and income security. Declines in fish stocks have resulted in greater concerns for food security, especially in developing and coastal areas, and calls for environmental conservation are growing. Planning of marine protected areas has traditionally been based on biological and ecological data, only r…	1	https://doi.org/10.1017/S0376892911000178
341	SDG2: Zero hunger	Reef accessibility impairs the protection of sharks	0	1. Reef sharks are declining world-wide under ever-increasing fishing pressure, with potential consequences on ecosystem functioning. Marine protected areas (MPAs) are currently one of the management tools used to counteract the pervasive impacts of fishing. However, MPAs in which reef sharks are abundant tend to be located in remote and underexploited areas, preventing a fair assessment of manag…	0	https://doi.org/10.1111/1365-2664.13007
342	SDG2: Zero hunger	Sizing up up the role of predators on Mullus barbatus populations in Mediterranean trawl and no-trawl areas	0	Fishing leads to drastic changes in ecosystems with a net loss of predatory biomass. This issue has been evidenced from historical ecological studies and from the evaluation of the effects of effective and large marine protected areas. In two fishery reserves off the northern Sicily coast the red mullet Mullus barbatus underwent an impressive biomass increment and a few piscivores fish species re…	0	https://doi.org/10.1016/j.fishres.2019.01.023
343	SDG2: Zero hunger	Northern Australia-indigenous fisheries management	1	Indigenous people were the first custodians and managers of Australia's fisheries resources (Coleman et al. 2003). While European colonization of Australia occurred in 1788, it has been only in recent history that indigenous peoples' affiliations with the land and sea have been formally identified and recognized by governments. These affiliations result from indigenous ownership, occupation, use,…	1
344	SDG2: Zero hunger	The Persistence of a Concept: Maximum Sustainable Yield	1	This essay explores the persistence of the concept of maximum sustainable yield (MSY) in global multilateral fishing law. It argues that MSY has contributed to the unsustainable governance of fishing activities by focusing on open access and catch-based management, instead of effort-based management. In response to the dire state of world fish stocks, it has been proposed to cut subsidies to the …	1	https://doi.org/10.1163/15718085-12341245
345	SDG2: Zero hunger	Establishing a Functional Region-Wide Coral Triangle Marine Protected Area System	0	The six Coral Triangle countries: Indonesia, Malaysia, Papua New Guinea, Philippines, Solomon Islands, and Timor-Leste, each have evolving systems of marine protected areas (MPAs) at the national and local levels. Now with more than 1,900 MPAs covering 208,152km(2) (1.6% of the extended economic zone for the region), the Coral Triangle Initiative for Coral Reefs, Fisheries and Food Security has e…	0	https://doi.org/10.1080/08920753.2014.877765
346	SDG2: Zero hunger	Occurrence, residency patterns and habitat use of the bottlenose dolphin, Tursiops truncatus truncatus, on two Marine Protected Areas in Southeastern Brazil	0	The common bottlenose dolphin, Tursiops truncatus, is widely distributed. However, information about its ecology and behavior in Brazilian waters is scarce especially about the 'offshore' ecotype, an Evolutionarily Significant Unit in the Southwest Atlantic. We report for the first time the occurrence, behavior and habitat use of bottlenose dolphins Tursiops truncatus truncatus, in two Marine Pro…	0	https://doi.org/10.1590/0001-3765202020180843
347	SDG2: Zero hunger	Adelie penguins' extensive seasonal migration supports dynamic Marine Protected Area planning in Antarctica	0	Spatiotemporal dynamics of ecosystems can challenge the pertinence of Marine Protected Area (MPA) planning. Seasonal environmental changes are extreme in polar regions, however MPA planning in East Antarctica relies mostly on species' summer distribution only. Thirteen Adelie penguins were tracked from Ile des Petrels (Terre Adelie), and their seasonal distribution and behaviour were compared to …	0	https://doi.org/10.1016/j.marpol.2019.103692
348	SDG2: Zero hunger	Introduction	1	This special issue provides a synthesis of the status and development of marine protected area (MPA) networks at regional, national, and subnational scales in response to the Coral Triangle Initiative on Coral Reefs, Fisheries and Food Security (CTI-CFF) commitments to establish a Coral Triangle Marine Protected Area System (CTMPAS) to reduce threats to marine resources in the region. The six art…	0	https://doi.org/10.1080/08920753.2014.877758
349	SDG2: Zero hunger	Using sea-ice to calibrate a dynamic trophic model for the Western Antarctic Peninsula	0	The pelagic ecosystems of the Western Antarctic Peninsula are dynamic and changing rapidly in the face of sustained warming. There is already evidence that warming may be impacting the food web. Antarctic krill, Euphausia superba, is an ice-associated species that is both an important prey item and the target of the only commercial fishery operating in the region. The goal of this study is to dev…	0	https://doi.org/10.1371/journal.pone.0214814
350	SDG2: Zero hunger	Observations on macrobenthic invertebrates and wader bird assemblages in a protected marine mudflat in Bahrain	0	Intertidal mudflats in Bahrain provide essential feeding grounds for a good number of shorebirds. The spatial distribution of soft-sediment macrobenthic invertebrate assemblages inhabiting a mudflat designated as a natural marine protected area was investigated to characterize shorebird food supplies. Molluscs accounted for 88% of the total macroinvertebrates community, reflecting a dominance of …	0	https://doi.org/10.1080/14634980802515948
351	SDG2: Zero hunger	Baja California to the Bering Sea: A North American marine conservation initiative	0	The Pacific region off the coast of North America has undergone dramatic changes over the past fifty years. These include: declines in Steller sea lion and sea otter populations in Alaska; decreases in salmon populations in British Columbia and Washington State; increased populations of fish such as Pollock in the Bering Sea; changes in food supply for sea birds; and changes in the migration of g…	0
352	SDG2: Zero hunger	Seagrass nurseries contribute to coral reef fish populations	0	We here provide strong evidence that seagrass beds act as nurseries providing fish to adult populations of a coral reef fish. We studied this habitat connectivity by tracing life history movements of the Caribbean reef fish Ocyurus chrysurus (yellowtail snapper). Carbon-and nitrogen-stable isotope variations in muscle tissue and otoliths (ear bones) record former food sources and show that 98% of…	0	https://doi.org/10.4319/lo.2008.53.4.1540
353	SDG2: Zero hunger	Sustainability Evaluation of Marine Protected Areas Index (SEMPAI): A multi-criteria decision-making method to determine the effectiveness of the El Nido-Taytay Managed Resource Protected Area	0	Located at the apex of the Coral Triangle, the Philippines is acknowledged as the world's center of shore fish biodiversity, and millions of Filipinos depend on these coastal resources for food and livelihood. In order to protect the coral reefs that form the base of many of these coastal ecosystems, Marine Protected Areas (MPAs) have been established throughout the country. However, although the…	0	https://doi.org/10.1016/j.ocecoaman.2019.104891
354	SDG2: Zero hunger	Do marine protected areas affect human nutrition and health? a comparison between villages in Roviana, Solomon islands	1	The implementation of marine protected areas (MPAs) for fisheries management has increased recently due to the perceived role of MPAs in conserving biodiversity, increasing fish stocks, and enhancing the food security of coastal communities. However, it is unclear whether MPAs may restrict the availability of marine resources and decrease overall food security and the health of the people. In the…	1	https://doi.org/10.1080/08920750701593394
355	SDG2: Zero hunger	Ecomarkets for conservation and sustainable development in the coastal zone	1	Because conventional markets value only certain goods or services in the ocean (e.g. fish), other services provided by coastal and marine ecosystems that are not priced, paid for, or stewarded tend to become degraded. In fact, the very capacity of an ecosystem to produce a valued good or service is often reduced because conventional markets value only certain goods and services, rather than the p…	1	https://doi.org/10.1111/j.1469-185X.2012.00251.x
356	SDG2: Zero hunger	Shellfish fishery severely reduces condition and survival of oystercatchers despite creation of large marine protected areas	0	Fisheries and other human activities pose a global threat to the marine environment. Marine protected areas (MPAs) are an emerging tool to cope with such threats. In the Dutch Wadden Sea, large MPAs (covering 31% of all intertidal flats) have been created to protect shellfish-eating birds and allow recovery of important habitats. Even though shellfish fishing is prohibited in these areas, populat…	0
357	SDG2: Zero hunger	Ocean zoning within a sparing versus sharing framework	1	The land-sparing versus land-sharing debate centers around how different intensities of habitat use can be coordinated to satisfy competing demands for biodiversity persistence and food production in agricultural landscapes. We apply the broad concepts from this debate to the sea and propose it as a framework to inform marine zoning based on three possible management strategies, establishing: no-…	1	https://doi.org/10.1007/s12080-017-0364-x
358	SDG2: Zero hunger	A national perspective on the role of Marine Protected Areas in sustaining fisheries	1	Marine Protected Areas (MPAs) have been used by traditional cultures for generations as a means to sustain local fisheries for food security. In more recent decades, MPAs have been used by coastal and ocean managers to protect special areas for a wide range of purposes - protecting threatened or rare species, conserving areas for biological diversity and other ecological functions, setting aside …	1	https://doi.org/10.1016/j.fishres.2012.09.002
359	SDG2: Zero hunger	Diet and food partitioning between juveniles of mutton Lutjanus analis, dog Lutjanus jocu and lane Lutjanus synagris snappers (Perciformes: Lutjanidae) in a mangrove-fringed estuarine environment	0	Diet of juvenile mutton Lutjanus analis, dog Lutjanus jocu and lane Lutjanus synagris snappers were studied in the tropical Brazilian estuarine system of the Piraque-acu and Piraque-mirim Rivers to determine how these species share the resources in this restricted space. The three species prey principally upon Peracarida (L. synagris: relative importance index I-RIc = 29%), Natantia (L. analis an…		https://doi.org/10.1111/j.1095-8649.2010.02586.x
360	SDG2: Zero hunger	Food-web traits of protected and exploited areas of the Adriatic Sea	1	This study presents a comparative analysis of protected and exploited Mediterranean Sea food webs using standardized ecological models of two ecosystems: the Central-North Adriatic Sea (highly exploited) and the Miramare Natural Marine Reserve (Northern Adriatic Sea, protected since 1986). Food webs are analysed in terms of structural and functional traits including trophic levels, transfer effic…	1	https://doi.org/10.1016/j.biocon.2010.06.002
361	SDG2: Zero hunger	Changes in prey fields increase the potential for spatial overlap between gentoo penguins and a krill fishery within a marine protected area	1	AIM: Management of competition with predators is an important consideration for fisheries, particularly within marine protected areas (MPAs) where conservation is a primary objective. We aimed to test whether static no-take zones within a large, sustainable-use MPA prevented overlap between gentoo penguins and a krill fishery during two winters with contrasting prey fields. LOCATION: South Georgi…	1	https://doi.org/10.1111/ddi.13216
362	SDG2: Zero hunger	The Seasonal and Inter-Annual Fluctuations of Plankton Abundance and Community Structure in a North Atlantic Marine Protected Area	1	Marine Protected Areas have become a major tool for the conservation of marine biodiversity and resources. Yet our understanding of their efficacy is often limited because it is measured for a few biological components, typically top predators or species of commercial interest. To achieve conservation targets, marine protected areas can benefit from ecosystem-based approaches. Within such an appr…	1	https://doi.org/10.3389/fmars.2019.00214
363	SDG2: Zero hunger	Food insecurity and coping strategies in a marine protected area in southeastern Tanzania	1	This article examines the perceived food security and coping strategies in coastal communities located in a marine protected area (MPA) in southeastern Tanzania. Drawing on fieldwork concentrated in a representative coastal village, the article illustrates how women in particular understand their food security situation in relation to the MPA. Data from interviews with 120 women suggest that the …	1	https://doi.org/10.1080/03670244.2018.1455672
364	SDG2: Zero hunger	Philippine Alliance of Fisherfolk: Ecohealth Practitioners for Livelihood and Food Security	1	Pamana Ka Sa Pilipinas (Pamana) is a grassroots fisherfolk alliance of Philippine Marine Protected Areas with more than 6,000 individual fisherfolk and their 30,000 family members. Access to food, education, and health services for Philippine fisherfolk families is directly dependant upon the fish harvest and related health of the marine environment. Pamana represents a unique ecohealth strategy,…	1	https://doi.org/10.1007/s10393-010-0334-x
365	SDG2: Zero hunger	Solutions for ecosystem-level protection of ocean systems under climate change	0	The Paris Conference of Parties (COP21) agreement renewed momentum for action against climate change, creating the space for solutions for conservation of the ocean addressing two of its largest threats: climate change and ocean acidification (CCOA). Recent arguments that ocean policies disregard a mature conservation research field and that protected areas cannot address climate change may be ov…	0	https://doi.org/10.1111/gcb.13423
366	SDG2: Zero hunger	A global network of marine protected areas for food	1	Marine protected areas (MPAs) are conservation tools that are increasingly implemented, with growing national commitments for MPA expansion. Perhaps the greatest challenge to expanded use of MPAs is the perceived trade-off between protection and food production. Since MPAs can benefit both conservation and fisheries in areas experiencing overfishing and since overfishing is common in many coastal…	1	https://doi.org/10.1073/pnas.2000174117
367	SDG2: Zero hunger	The perceptions of local fishermen towards a hotel managed marine reserve in Vietnam	1	Marine Protected Areas (MPAs) often fail to meet ecological, social or economic objectives due to lack of effective management by government institutions. Partly in response to this failure, a number of marine reserves managed by the private sector, Hotel Managed Marine Reserves (HMMRs), have recently been established. In this study, we investigate changes to the social and economic conditions fa…		https://doi.org/10.1016/j.ocecoaman.2010.01.001
368	SDG2: Zero hunger	Food, money and lobsters: Valuing ecosystem services to align environmental management with Sustainable Development Goals	1	With over 1 billion people currently relying on the services provided by marine ecosystems - e.g. food, fibre and coastal protection - governments, scientists and international bodies are searching for innovative research to support decision-makers in achieving the Sustainable Development Goals (SDGs). Valuing past and present ecosystem services allows investigation into how different scenarios i…	1	https://doi.org/10.1016/j.ecoser.2017.10.023
369	SDG2: Zero hunger	Trends in African Black Oystercatcher Haematopus moquini populations between the early 1980s and early 2000s, with consideration of the influence of protected habitats and food availability	0	The African Black Oystercatcher Haematopus moquini is classified as Near Threatened because the population size is small (<10 000) and numbers have decreased or were previously recorded as decreasing. Although human activity has increased in many parts of the species' breeding range, oystercatchers may be benefiting from an increase in the extent of Marine Protected Areas as well as an improved f…	0	https://doi.org/10.2989/00306525.2015.1029030
370	SDG2: Zero hunger	Invasions of the non-indigenous red alga Lophocladia lallemandii (Montagne) F. Schmitz off the Island of Ischia (Tyrrhenian Sea, Italy)	0	This paper describes the distribution and spread of the non-indigenous red alga Lophocladia lallemandii (Montagne) F. Schmitz along the coast of the Island of Ischia (Tyrrhenian Sea, Italy). Lophocladia lallemandii was monitored through surveys from July 2019 to January 2020 at the Capo Sant' Angelo (Ischia), where L. lallemandii was observed, but not reported, in the years preceding the invasion…	0	https://doi.org/10.3391/bir.2021.10.1.11
371	SDG2: Zero hunger	Ecological role of bluefin tuna (Thunnus thynnus) fish farms for associated wild fish assemblages in the Mediterranean Sea	0	The ecological effects of tuna fish farms are largely undocumented. This study confirmed their high capacity to attract surrounding wild fish. The aggregation effect persisted year round, without detectable seasonal differences. Farm impact was restricted to close proximity of the sea cages, and was more prominent over the bottom than in the water column strata. Tuna fish farms proved to be high …		https://doi.org/10.1016/j.marenvres.2017.10.015
372	SDG2: Zero hunger	Effects of fishing on a temperate reef community in South Africa 2: benthic invertebrates and algae	0	The effect of fishing on benthic reef communities was studied by comparing reefs within and outside the Goukamma Marine Protected Area (MPA) on the South African warm-temperate south coast. Although study sites were similar in terms of bathymetry and oceanographic conditions, benthic reef communities were significantly different with higher abundance of algae and crinoidea at fished sites. Crinoi…		https://doi.org/10.2989/AJMS.2009.31.2.13.885
373	SDG2: Zero hunger	Refining estimates of potential white abalone habitat at northern Anacapa Island, California using acoustic backscatter data	0	Acoustic backscatter data provides exceptional detail of rocky seafloor habitat on the continental shelf north of Anacapa Island off Southern California. In the depth range of 25-65 m, there are approximately 60 ha of rocky bottom which may be suitable for abalone Haliotis spp. The distribution of rocky bottom is divided into two separate areas on the northeastern and northwestern sides of the is…	1
374	SDG2: Zero hunger	Global Oceans Governance: New and Emerging Issues	1	Increased interest in oceans is leading to new and renewed global governance efforts directed toward ocean issues in areas of food production, biodiversity conservation, industrialization, global environmental change, and pollution. Global oceans governance efforts face challenges and opportunities related to the nature of oceans and to actors involved in, the scale of, and knowledge informing th…	1	https://doi.org/10.1146/annurev-environ-102014-021121
375	SDG2: Zero hunger	ENVIRONMENTAL-EFFECTS OF MARINE FISHING	1	1. Some effects of fisheries on the associated biological systems are reviewed and management options and their inherent risks are considered. 2. In addition to the effects on target species, other sensitive groups impacted by fishing are considered including marine mammals, turtles, sea birds, elasmobranchs and some invertebrates with low reproductive rates. 3. Other impacts discussed include th…	1	https://doi.org/10.1002/aqc.3270050305
376	SDG2: Zero hunger	rbcL gene amplification reveals first record of Porphyra mumfordii (Bangiales, Rhodophyta) in Valparaiso Bay, central Chile	0	The genus Porphyra, commonly found along Chilean coast, is an important commercial algal food known as nori. There are some specimens of Porphyra found at Montemar Marine Protected Area (32 degrees 57'S; 71 degrees 33'W) in Valparaiso Bay, which taxonomical identity is not clear. This study aimed to identify long-bladed specimens of Porphyra inhabiting the upper, mid and lower intertidal in Valpa…		https://doi.org/10.4067/S0718-19572018000100131
377	SDG2: Zero hunger	Sea mammals in marine protected area in the Gulf of Kachchh, Gujarat State, India	0	Marine National Park and Sanctuary (collectively designated as Marine Protected Area or MPA) in the Gulf of Kachchh in Gujarat State has coral reefs, mangroves, sea-grass beds, mudflats, network of creeks and other ecosystems which supports rich marine life, including sea mammals. Although a total of 13 sea mammals have been recorded, only small mammals like dolphins, porpoise and dugong visit sh…	0
378	SDG2: Zero hunger	The ecosystem effects of abalone fishing: a review	0	Although abalone fishing involves less damage to the habitat compared with other fishing methods, such as trawling and dredging and there are no problems of bycatch or discards, there are a number of issues relating to impact on the ecosystem. These issues include mechanical damage from anchors, catch bags and hoses, manipulation of predators and competitors by fishermen, and translocation of mar…	0	https://doi.org/10.1071/MF04046
379	SDG2: Zero hunger	Billfishes in an ecosystem context	0	There is a rising tenor of calls for ecosystem-based approaches to fisheries management. Many billfishes are apex predators in pelagic food webs and, therefore, of potential ecological significance as keystone predators. Most billfishes are vulnerable to exploitation effects, especially those taken as by-catch where longline fishing occurs. We developed a series of ecosystem models that serve as …	0
380	SDG2: Zero hunger	Growing Up Down South: Spatial and Temporal Variability in Early Growth of Fuegian Sprat Sprattus fuegensis From the Southwest Atlantic Ocean	0	The Fuegian sprat Sprattus fuegensis represents one of the most important pelagic resources in the Southwest Atlantic Ocean (SWAO), exerting a crucial ecological role as an intermediary link in Patagonian food webs. Otolith microstructure of 217 age-0 sprats were analyzed aiming to characterize growth patterns and possible environmental effects over them. Samples were gathered during three oceano…		https://doi.org/10.3389/fmars.2020.00322
381	SDG2: Zero hunger	Size matters: Predator outbreaks threaten foundation species in small Marine Protected Areas	0	The unanticipated impacts of consumers in fragmented habitats are frequently a challenge for ecosystem management. On Indo-Pacific coral reefs, crown-of-thorns sea stars (Acanthaster spp.) are coral predators whose outbreaks cause precipitous coral decline. Across large spatial scales, Acanthaster densities are lower in large no-take Marine Protected Areas (MPAs) and reefs subject to limited huma…	0	https://doi.org/10.1371/journal.pone.0171569
382	SDG2: Zero hunger	Use of fishes as sampling tools for understanding biodiversity and ecosystem functioning in the ocean	0	Across the globe, regulatory bodies are moving towards an ecosystem-based approach to management (EAM) of oceans. As part of this directive, criteria have been outlined for defining ecologically and biologically significant areas and marine protected areas. One of the first steps in identifying either is the development of an inventory of species' spatial distributions and the identification of h…	0	https://doi.org/10.3354/meps09773
383	SDG2: Zero hunger	Predicting Stakeholder Support for Fishery Policies	1	Fisheries management has been used to address declining fisheries and threats to livelihood and food security. Past research suggests that public support for fishery policies is a necessary component for sustaining the long-term success of fisheries management. This study predicted public support by examining fishers' perspectives on co-management and fish catch since the establishment of marine …		https://doi.org/10.1080/08920753.2011.637484
384	SDG2: Zero hunger	Ecosystem consideration in conservation planning: energy demand of foraging bottlenose whales (Hyperoodon ampullatus) in a marine protected area	0	The Gully, a submarine canyon off eastern Canada, was nominated as a pilot Marine Protected Area (MPA) in 1998, largely to safeguard the vulnerable population of northern bottlenose whales (Hyperoodon ampullatus) found there. The boundaries and ultimate management regime for the MPA for this area remain under review. We have estimated the energy consumption of bottlenose whales in the Gully based…	0	https://doi.org/10.1016/S0006-3207(01)00153-7
385	SDG2: Zero hunger	Hemispheric asymmetry in ocean change and the productivity of ecosystem sentinels	0	Climate change and other human activities are causing profound effects on marine ecosystem productivity. We show that the breeding success of seabirds is tracking hemispheric differences in ocean warming and human impacts, with the strongest effects on fish-eating, surface-foraging species in the north. Hemispheric asymmetry suggests the need for ocean management at hemispheric scales. For the no…		https://doi.org/10.1126/science.abf1772
386	SDG2: Zero hunger	Variation in reef fish and invertebrate communities with level of protection from fishing across the Eastern Tropical Pacific seascape	0	Aim To quantify general differences in reef community structure between well-enforced and poorly enforced marine protected areas (MPAs) and fished sites across the Eastern Tropical Pacific (ETP) regional seascape Location The Pacific continental margin and oceanic islands of Costa Rica, Panama, Colombia and Ecuador, including World Heritage sites at Galapagos, Coiba, Cocos and Malpelo Methods Den…		https://doi.org/10.1111/j.1466-8238.2010.00642.x
387	SDG2: Zero hunger	Evaluating the management effectiveness of marine protected areas at seven selected sites in the Philippines	1	Fisheries is a vital sector in the Philippine economy, providing a significant source of both domestic and export earnings while meeting essential food security and nutritional requirements. However, marine resources in the Philippines are facing increasing pressure from overfishing, destructive fishing practices, habitat destruction, declining water quality and limited management capacity. Marin…	1	https://doi.org/10.1016/j.marpol.2015.02.008
388	SDG2: Zero hunger	Interactions of productivity, predation risk, and fishing effort in the efficacy of marine protected areas for the central Pacific	1	Ecospace biomass-dynamics models for the central North Pacific predict strong space-time variation in abundances of various trophic groups in relation to nutrient-driven patterns in primary production and circulation-driven concentration of production in convergence areas. The model predicts simple patterns in ecosystem organization and abundances along productivity gradients. Predicted patterns …	1	https://doi.org/10.1139/F05-114
389	SDG2: Zero hunger	FORAGING RANGES OF INCUBATING SOOTY TERNS ONYCHOPRION FUSCATUS ON BIRD ISLAND, SEYCHELLES, DURING A TRANSITION FROM FOOD PLENTY TO SCARCITY, AS REVEALED BY GPS LOGGERS	0	The foraging tracks of incubating Sooty Terns, nesting on Bird Island, Seychelles, were identified using global positioning system (GPS) loggers attached to the central pair of rectrices. By chance, our 2014 study covered a transition from food abundance to shortage. Incubation shifts during food abundance were mainly 1-2 d long but, at the height of food shortage, ranged from 4 d to 13 d, leadin…
390	SDG2: Zero hunger	Diel and vertical movements of preflexion fish larvae assemblages associated with Posidonia oceanica beds	0	Habitat complexity is a strong determinant of fish assemblage structure. Enhanced food resources and protection from predators are generally considered the main benefits of vegetated areas. We investigated the diel and vertical movements of preflexion fish larvae within and above the leaf canopy of Posidonia oceanica to determine if it acts as an important habitat for larval stage fish. Samples w…	0	https://doi.org/10.3989/scimar.2006.70n3399
391	SDG2: Zero hunger	POSTMORTEM FINDINGS IN CETACEANS FOUND STRANDED IN THE PELAGOS SANCTUARY, ITALY, 2007-14	0	Between 2007 and 2014, 83 cetaceans were found stranded along the Ligurian coast of Italy, in the Pelagos Sanctuary, the largest marine protected area in the Mediterranean basin. Forty-nine (59%) were submitted to complete or partial necropsy, depending on the conservation status of the carcass. Based on gross and histological pathology and ancillary testing, the cause of death was determined and…	0	https://doi.org/10.7589/2016-07-150
392	SDG2: Zero hunger	Marine protected areas and children's dietary diversity in the Philippines	1	Fish living around the coral reefs in the Philippines provide livelihoods for more than a million local fishers and are an important source of protein for coastal communities. However, this rich resource is at risk from myriad threats, which consequently threaten human livelihoods, nutrition, and health. In this paper, we examine the degree to which marine protected areas (MPAs), which aim to con…	1	https://doi.org/10.1007/s11111-015-0240-9
393	SDG2: Zero hunger	The bottom line: An investigation of the economic, cultural and social costs of industrial longline fishing in the Pacific and the benefits of sustainable use marine protected areas	1	Industrial longline fishing can be understood as a case study of the cultural, economic, environmental and social impacts of unsustainable fishing technology. While much attention has been attributed to the impact of industrial longlines on the marine ecosystem, little is known about the impact of longline fishing on local food security, employment, cultural belief systems and traditions, revenue…	1	https://doi.org/10.1016/j.marpol.2006.04.001
394	SDG2: Zero hunger	Sustainable financing of a national Marine Protected Area network in Fiji	1	Marine Protected Areas (MPA) are mostly studied from an environmental context. A review of available information identified a lack of knowledge in sustainable mechanisms to finance MPA networks. At the United Nations Ocean Conference in 2017, Fiji reaffirmed its voluntary commitment to make 30% of its inshore and offshore marine area MPAs by 2020 under Sustainable Development Goal 14. The work pr…	1	https://doi.org/10.1016/j.ocecoaman.2018.07.011
395	SDG2: Zero hunger	Twenty thousand sterling under the sea: Estimating the value of protecting deep-sea biodiversity	0	The deep-sea includes over 90% of the world's oceans and is thought to be one of the most diverse ecosystems in the world. It supplies society with valuable ecosystem services, including the provision of food, the regeneration of nutrients and the sequestration of carbon. Technological advancements in the second half of the 20th century made large-scale exploitation of mineral, hydrocarbon and fi…	0	https://doi.org/10.1016/j.ecolecon.2013.10.019
396	SDG2: Zero hunger	The effects of fish feeding by visitors on reef fish in a Marine Protected Area open to tourism	0	Coral reef-based tourism has risen sharply across the globe, coupled with an increase in fish feeding by visitors. Studies indicate that fish feeding is one of the leading causes of changes in distribution patterns, abundance, the structure of marine fish communities, and fish behavior. The aim of this study was to determine the effect of human presence and fish feeding on the behavior of reef fi…	0	https://doi.org/10.1590/1676-0611-BN-2017-0339
397	SDG2: Zero hunger	Socio-cultural context of fishers' participation in coastal resources management in Anini-y, Antique in west central Philippines	1	The vicious cycle of poverty, overfishing and resource degradation in coastal communities in the Philippines calls for action that will address the problem of declining fish catch and degraded fish habitats. The literature has shown that an efficient and effective coastal management program can be instrumental in approaching this problem. In order to secure food and livelihood of fishers, the Sou…	1	https://doi.org/10.1016/j.fishres.2010.10.014
398	SDG2: Zero hunger	Occurrence of juvenile bull sharks (Carcharhinus leucas) in the Navua River in Fiji	0	Effective species conservation requires the protection of all stages of its life-cycle. The Shark Reef Marine Reserve (SRMR) in Fiji is a marine protected area where large numbers of adult bull sharks (Carcharhinus leucas) congregate due to food provisioning. At the end of a calendar year bull sharks leave the area for reproductive activity, but parturition sites are still unknown. Between Februa…	0	https://doi.org/10.1071/MF16005
399	SDG2: Zero hunger	Phase shifts and the role of herbivory in the resilience of coral reefs	0	Cousin Island marine reserve (Seychelles) has been an effectively protected no-take marine protected area (MPA) since 1968 and was shown in 1994 to support a healthy herbivorous fish assemblage. In 1998 Cousin Island reefs suffered extensive coral mortality following a coral bleaching event, and a phase shift from coral to algal dominance ensued. By 2005 mean coral cover was < 1%, structural comp…		https://doi.org/10.1007/s00338-007-0230-1
400	SDG2: Zero hunger	Conservation policies informed by food system feedbacks can avoid unintended consequences	0	Measures to protect marine habitats must consider the interlinkages between conservation policies and food systems. This study illustrates how a new protected area in Palau may shift fish supply and tourist consumption, highlighting policies to avoid negative environmental consequences. Understanding the feedbacks between food systems and conservation policies can help avoid unintended environmen…	0	https://doi.org/10.1038/s43016-020-00192-7
401	SDG2: Zero hunger	Can habitat protection lead to improvements in human well-being? Evidence from marine protected areas in the Philippines	1	The hypothesis that sustainable resource management and biodiversity conservation can result in material benefits to participating communities has existed under different guises in the concepts of sustainable development, integrated conservation and development projects, sustainable use, and community-based resource management. What these approaches have in common is the belief that win-win situa…	1	https://doi.org/10.1016/j.worlddev.2004.07.009
402	SDG2: Zero hunger	Protected nearshore shallow and deep subtidal rocky reef communities differ in their trophic diversity but not their nutritional condition	0	Large physical changes that alter reef macrobenthos and fish assemblages occur with increasing depth, so the biological processes that regulate communities at different depths are expected to diverge. We used analyses of stable isotopes (delta 13C and delta 15N) and fatty acids to establish whether shallow (11-25 m) and deep (45-75 m) warm-temperate reef communities within a South African marine …	0	https://doi.org/10.2989/1814232X.2019.1580614
403	SDG2: Zero hunger	Impacts on the ecosystem and human well-being of the marine protected area in Cu Lao Cham, Vietnam	1	Biodiversity conservation can alter the ecosystems and ecosystem services that are vital for human well-being. Understanding this linkage is essential for management planning to enhance the conservation and sustainable use of ecosystems and their values to human well-being. This study evaluates the impacts of coral reef conservation and marine protected areas (MPAs) on the well-being of fishing c…	1	https://doi.org/10.1016/j.marpol.2017.12.015
404	SDG2: Zero hunger	Temporal-spatial distribution of an island-based offshore population of common bottlenose dolphins (Tursiops truncatus) in the equatorial Atlantic	0	A little-studied common bottlenose dolphin (Tursiops truncatus) population inhabits the offshore waters surrounding Saint Paul's Rocks, a Brazilian marine protected area in the equatorial Atlantic Ocean. Five field expeditions (May 2011-May 2013) were conducted to characterize the habitat use, population size, and site fidelity of this population. Three different survey methods were employed: lin…		https://doi.org/10.1111/mms.12380
405	SDG2: Zero hunger	Reducing human impacts on central Californian intertidal gastropods: are marine protected areas effective?	0	The central California coast is visited by millions of people every year, many of whom collect intertidal gastropods for food, bait or recreation in near-shore marine environments. The harvesting of these animals has caused a decline in body size because humans preferentially take the largest individuals. Marine protected areas (MPAs) may serve to protect gastropods from this impact. The average …		https://doi.org/10.1080/13235818.2017.1278957
406	SDG2: Zero hunger	Does Le Danois Bank (El Cachucho) influence albacore catches in the Cantabrian Sea?	0	This study explores the relationship between a seamount located in the Cantabrian Sea known as Le Danois Bank (El Cachucho fishing ground), the first offshore Marine Protected Area (MPA) in Spain, and the Spanish albacore (Thunnus alalunga) surface fishery that operates during the summer and autumn months. The geographical distribution of catch per unit effort (CPUEs), expressed by number, showed…		https://doi.org/10.1016/j.csr.2008.12.018
407	SDG2: Zero hunger	Multifunctionality in fisheries and the provision of public goods	0	Multifunctionality is characterized by two key elements: the existence of jointly produced multiple commodity and non-commodity outputs (NCOs), and that NCOs exhibit the characteristics of public goods externalities. The term multifunctionality is almost not used outside agriculture. However, several issues discussed in fishery literature and in international contexts clearly refer to public good…	0	https://doi.org/10.1016/j.ocecoaman.2018.10.037
408	SDG2: Zero hunger	Fisheries cooperation in the South China Sea: Evaluating the options	1	Given the complicated nature of the South China Sea (SCS) disputes, resolving the disputes in the foreseeable future remains highly unlikely. Proper management of these disputes to ensure stability in the South China Sea becomes a priority. There is a general consensus that the best approach for managing the disputes in the SCS is to set aside the sovereignty disputes and jointly develop and mana…	1	https://doi.org/10.1016/j.marpol.2017.12.014
409	SDG2: Zero hunger	At the sea's edge: Elders and children in the littorals of Barbados and the Bahamas	1	Littorals in the in the Exuma Cays, Bahamas and the Bath Plantation, Barbados are comparative in many ways. These edges of the sea have provided critical services to local people during the time of slavery and since. More than food and medicine, the littoral is the nightly sea bath, where children are instructed, and the last ecosystem effectively used by the elderly. Independence and self-respec…	1	https://doi.org/10.1007/s10745-006-9100-7
410	SDG2: Zero hunger	Euphausiid assemblages of the oceanographically complex north-west marine bioregion of Australia	0	The north-west marine bioregion of Australia, which includes the waters adjacent to the Kimberley and Ningaloo coasts, is influenced by both the Indian and Pacific oceans and has high tropical biodiversity, some of which is conserved in a suite of Marine Protected Areas. In the present study, the epipelagic euphausiid assemblages of this bioregion were investigated and related to the physical and…		https://doi.org/10.1071/MF16334
411	SDG2: Zero hunger	Fishing catch shares in the face of global change: a framework for integrating cumulative impacts and single species management	0	Any fishery management scheme, such as individual fishing quotas (IFQs) or marine protected areas, should be designed to be robust to potential shifts in the biophysical system. Here we couple possible catch scenarios under an IFQ scheme with ocean acidification impacts on shelled benthos and plankton, using an Atlantis ecosystem model for the US West Coast. IFQ harvest scenarios alone, in most c…	0	https://doi.org/10.1139/F10-118
412	SDG2: Zero hunger	Livelihood diversification and institutional (dis-)trust: Artisanal fishing communities under resource management programs in Providencia and Santa Catalina, Colombia	1	The expanse of ocean designated as marine protected areas (MPAs) has increased considerably, particularly since the 1990s. Most MPAs are situated close to shore where small-scale fishermen access resources for nutritional and economic security, which may potentially create adverse effects on local livelihoods. This paper draws from the results of fourteen-months of fieldwork conducted on the Cari…	1	https://doi.org/10.1016/j.marpol.2016.01.021
413	SDG2: Zero hunger	The potential impact of marine protected areas on the Senegalese sardinella fishery	1	In the early 2000s, Senegal set up several Marine Protected Areas (MPAs) along its coastal zone with the purpose of biodiversity conservation and to support sustainable management of fisheries. However, the impact of MPAs may vary according to the type of fisheries. In Senegal, the sardinella fishery accounts for 70% of total catches. This fishery is of crucial importance for national food securi…	1	https://doi.org/10.1016/j.ocecoaman.2018.12.020
414	SDG2: Zero hunger	Social-ecological Changes, Livelihoods and Resilience Among Fishing Communities in Mafia Island Marine Park, Tanzania	1	Analysis of societal dimensions is increasingly receiving attention in socialecological resilience research. This study investigates the impacts of neo-liberal marine conservation and economic policies, and environmental changes on the livelihoods of two fishing communities in Mafia Island Marine Park, Tanzania, and their response strategies towards attempting to maintain livelihood resilience. T…	1	https://doi.org/10.1080/08039410.2015.1065906
415	SDG2: Zero hunger	Beluga whales (Delphinapterus leucas), environmental change and marine protected areas in the Western Canadian Arctic	1	Two Arctic Marine Protected Areas (MPAs) (Tarium Niryutait and Anguniaqvia niqiqyuam) have been established in the Western Canadian Arctic, including the first in the Arctic, with conservation objectives directed to protect and maintain healthy beluga (Delphinapterus leucas) populations. The MPAs support the continued access of Inuvialuit (Western Arctic Inuit) to harvest beluga whales for food s…	1	https://doi.org/10.1016/j.ecss.2018.05.026
416	SDG2: Zero hunger	Wild fish aggregations around fish farms in the Gulf of Aqaba, Red Sea: implications for fisheries management and conservation	0	Fish farm structures attract a variety of fish species by providing solid structure, and 'free meals' in the form of uneaten feed and feces that fall from the cages. In this study, we compared the composition and abundances of wild fish populations around 2 fish farms in the Red Sea and at nearby reference locations. Fish assemblages were evaluated by SCUBA divers carrying out rapid visual census…	0	https://doi.org/10.3354/aei00076
417	SDG2: Zero hunger	Further efforts to protect biodiversity in coastal waters of South Australia	0	Marine sanctuary zones (MSZs) in South Australia were established under a regime of opposition from commercial and recreational fishers with some assistance from fisheries scientists. Fish exploitation was not the only threat discussed by the Scientific Working Group for Marine Protected Areas (MPAs) but it was considered as a major threat. There was some argument over the interpretation of the P…	0	https://doi.org/10.1016/j.ocecoaman.2014.12.013
418	SDG2: Zero hunger	Papuan Bird's Head Seascape: Emerging threats and challenges in the global center of marine biodiversity	1	The Bird's Head Seascape located in eastern Indonesia is the global epicenter of tropical shallow water marine biodiversity with over 600 species of corals and 1,638 species of coral reef fishes. The Seascape also includes critical habitats for globally threatened marine species, including sea turtles and cetaceans. Since 2001, the region has undergone rapid development in fisheries, oil and gas …	1	https://doi.org/10.1016/j.marpolbul.2012.07.024
419	SDG2: Zero hunger	Can bottom trawling disturbance increase food production for a commercial fish species?	0	Fishery closures and marine protected areas are increasingly being used as tools to achieve sustainable fisheries. The plaice box, a gear restriction area in the North Sea that was established to reduce the bycatch of undersized plaice (Pleuronectes platessa), is considered ineffective because there has been a shift in the distribution of juvenile plaice to the waters that remained open to bottom…	0	https://doi.org/10.1139/F08-064
420	SDG2: Zero hunger	Impact of Ocean Acidification on Ecosystem Functioning and Services in Habitat-Forming Species and Marine Ecosystems	0	Ocean acidification (OA) is expected to impact habitat-forming species (HFS), with cascading effects on the whole marine ecosystem and related services that are seldom quantified. Here, the changes in HFSs biomass due to OA are modeled using a food web ecosystem model, and the trophic and non-trophic cascading effects on the marine community are investigated. The food web model represents a well-…	0	https://doi.org/10.1007/s10021-021-00601-3
421	SDG2: Zero hunger	Marine protected areas, Satoumi, and territorial use rights for fisheries: A case study from hinase, Japan	0	In spite of the growing attention towards the overall quality of Marine Protected Areas (MPAs), most empirical studies so far have narrowly focused their assessments on specific natural or social features and governing structures. In response, this study analyzed multi-use MPAs in the eelgrass restoration site in Hinase, Okayama, Japan in their environmental, economic and social dimensions. Consi…	0	https://doi.org/10.1016/j.marpol.2018.02.001
422	SDG2: Zero hunger	Commensal symbiosis between agglutinated polychaetes and sulfate- reducing bacteria	0	Pendant bioconstructions occur within submerged caves in the Plemmirio Marine Protected Area in SE Sicily, Italy. These rigid structures, here termed biostalactites, were synsedimentarily lithified by clotted-peloidal microbial carbonate that has a high bacterial lipid biomarker content with abundant compounds derived from sulfate-reducing bacteria. The main framework builders are polychaete serp…		https://doi.org/10.1111/gbi.12084
423	SDG2: Zero hunger	Brachioteuthis beanii Verrill, 1881 (Cephalopoda: Brachioteuthidae) in the northwest Atlantic	0	Four research cruises to the Gully Marine Protected Area (known as the Gully) off Nova Scotia, Canada (2007-2010) collected 1454 specimens of the oegopsid squid family Brachioteuthidae. All specimens were identified as Brachioteuthis beanii, and the 842 individuals collected in 2007 were used to describe the morphology and ecology of the species. A subset of 565 specimens were measured for popula…		https://doi.org/10.5343/bms.2019.0073
424	SDG2: Zero hunger	Spatial variation in sea urchins, fish predators, and bioerosion rates on coral reefs of Belize	0	Although sea urchins are critical for controlling macroalgae on heavily fished coral reefs, high densities threaten reefs, as urchins are also prodigous bioeroders. This study examined urchin population characteristics, bioerosion rates, their fish predators (Labridae), and potential competitors (Scaridae) on unprotected reefs and a reef within a marine protected area (MPA) in the lagoonal region…		https://doi.org/10.1007/s00338-006-0159-9
425	SDG2: Zero hunger	Effects of cooperation and different characteristics of Marine Protected Areas in a simulated small-scale fishery	1	Marine fisheries are a critically important source of food, nutrition, and employment for millions of people. As the global population increases, new and expanding pressures are created on fish resources. Marine Protected Areas (MPAs) have been widely promoted as valuable tools for rebuilding or maintaining fish stocks around the world. The success of MPAs, however, widely depends on their partic…	1	https://doi.org/10.1016/j.ecocom.2020.100876
426	SDG2: Zero hunger	Economic impacts of climate change and climate change adaptation strategies in Vanuatu and Timor-Leste	1	The fisheries sectors in Vanuatu and Timor-Leste are important sources of food and income. Similar to other developing countries and those in the Pacific, they are vulnerable to the impacts of climate change more so because of their geographic location, socioeconomic conditions and political instability. Nonetheless, there are approaches to alleviate the damaging effects of climate change in the …	1	https://doi.org/10.1016/j.marpol.2015.12.010
427	SDG2: Zero hunger	Effective ecosystem-based management must encourage regulatory compliance: A Gulf of California case study	1	The Northern Gulf of California is an area important for small-scale fisheries in terms of economic activity and food security, but widespread non-compliance with fisheries regulations impedes effective management of resources and conservation efforts. Where a previous study evaluated quantitatively a theoretical situation in which all regulations are perfectly followed, this article compares a s…	1	https://doi.org/10.1016/j.marpol.2012.03.016
428	SDG2: Zero hunger	The bottom line: An investigation of the economic, cultural and social costs of high seas industrial longline fishing in the Pacific and the benefits of conservation	1	High sea industrial longline fishing can be understood as a case study of the cultural, economic, environmental and social impacts of unsustainable fishing technology. While much attention has been attributed to the impact of industrial longlines on the marine ecosystem, little is known about the impact of longline fishing on local food security, employment, cultural belief systems and traditions…	1	https://doi.org/10.1016/j.marpol.2006.09.002
429	SDG2: Zero hunger	Movements of small adult black rockfish: implications for the design of MPAs	0	Off the coast of central California, USA, small black rockfish Sebastes melanops (individuals below the length at 50% maturity) comprise a large percentage of the catch in recreational fisheries, yet little is known about the movements of these small fish. To better understand their movements, we implanted acoustic transmitters into 23 black rockfish (29 to 41 cm total length) in Carmel Bay, Cali…	0	https://doi.org/10.3354/meps09263
430	SDG2: Zero hunger	Variation in owl limpet Lottia gigantea population structures, growth rates, and gonadal production on southern California rocky shores	0	The size structures of Lottia gigantea populations were studied at 8 southern California sites, 4 of which were longstanding Marine Protected Areas (MPAs). Greater mean sizes and higher frequencies of larger individuals occurred at sites with lowest human visitation. Mean L, gigantea shell lengths (SLs) were negatively correlated with the number of visitors and collectors per 10 m of shoreline. L…		https://doi.org/10.3354/meps257111
431	SDG2: Zero hunger	Using stereoscopic video cameras to evaluate seagrass meadows nursery function in the Mediterranean	0	Seagrasses provide an important ecological value as nursery habitats, hosting higher juvenile densities than their surrounding less-structured habitats by offering shelter and food to early stages of fish. However, the quantitative evaluations of this nursery function remain elusive. Surveys assessing abundances of juvenile fish over seagrass meadows have been largely conducted by diving visual c…	0	https://doi.org/10.1007/s00227-017-3169-y
432	SDG2: Zero hunger	Moving beyond trophic groups: evaluating fishing-induced changes to temperate reef food webs	0	Fish capture has far-reaching but inadequately assessed implications for marine food webs. At the community level, such effects are typically investigated using dynamic models that rely on partially subjective categorization of species into trophic groups and that mostly overlook the substantial contribution of ontogenetic dietary variation within fish species. Here, we estimate consumption by fi…	0	https://doi.org/10.3354/meps12433
433	SDG2: Zero hunger	Acoustic Detection of Krill Scattering Layer in the Terra Nova Bay Polynya, Antarctica	0	Krill play a crucial role in the transfer of energy in the marine food web, connecting primary producers and the upper trophic levels in the Terra Nova Bay polynya (TNBP), which is part of the Ross Sea marine protected area. Despite the substantial ecological importance of krill, there are few studies on their distribution and abundance in the TNBP. An acoustic survey was conducted on 7-14 Januar…		https://doi.org/10.3389/fmars.2020.584550
434	SDG2: Zero hunger	Recreational fish feeding affects coastal fish behavior and increases frequency of predation on damselfish Chromis chromis nests	0	Wildlife feeding has become an integral part of the range of activities offered to protected area visitors. In marine protected areas (MPAs), fish feeding may cause changes in the behavior, and thus the density and distribution, of coastal fish species. We evaluated spatial variability in human-positive fish behavior around the Ustica Island MPA (Italy) and the potential indirect effects of behav…		https://doi.org/10.3354/meps310165
435	SDG2: Zero hunger	Food risk trade-off in the Indo-Pacific humpback dolphin: An exploratory case study	0	Based on optimal foraging theory, animals are expected to maximize foraging benefits whilst minimizing risks. Despite risking being subjected to anthropogenic impacts such as water contamination, marine traffic, and underwater noise, estuaries have been identified as the preferred habitat of the Indo-Pacific humpback dolphin (Sousa chinensis, IPHD). However, it remains unclear why this vulnerable…		https://doi.org/10.1002/aqc.3280
436	SDG2: Zero hunger	Economic impact of climate change and climate change adaptation strategies for fisheries sector in Fiji	0	Capture fisheries and aquaculture sectors have played major roles in the national economy and food security of Fiji. But climate change may place substantial stress on these sectors within this archipelago. This paper assesses the potential economic impact of two important climate change adaptation strategies in Fiji, natural resource management (NRM) and aquaculture, using a market fish supply-d…	0	https://doi.org/10.1016/j.marpol.2015.12.023
437	SDG2: Zero hunger	Biodiversity, feeding habits and reproductive strategies of benthic macrofauna in a protected area of the northern Adriatic Sea: a three-year study	0	The macrozoobenthic community at a sublittoral station located in the Marine Protected Area of Miramare, Gulf of Trieste (Italy) was investigated monthly from June 2002 to July 2005. Community variables were studied and related to food sources (particulate, total and biopolymeric carbon contents, benthic microalgae and meiofauna). In addition, macrofaunal response to a heatwave that occurred in s…	0	https://doi.org/10.12681/mms.1897
438	SDG2: Zero hunger	Ecosystem-based management of coral reefs under climate change	1	Coral reefs provide food and livelihoods for hundreds of millions of people as well as harbour some of the highest regions of biodiversity in the ocean. However, overexploitation, land-use change and other local anthropogenic threats to coral reefs have left many degraded. Additionally, coral reefs are faced with the dual emerging threats of ocean warming and acidification due to rising CO2 emiss…	11	https://doi.org/10.1002/ece3.4146
439	SDG2: Zero hunger	A discussion of management disputes arising from the multiple utilization of flying fish resources in Taiwan and suggested countermeasures	0	Flying fish play a vital role in maintaining the balance of marine ecosystems. In Taiwan, flying fish resources are mainly utilized in three ways. The Tao aboriginal people regard them as an important, and spiritual, source of food and utilize the resource sparingly and cautiously. Conversely, in northern Taiwan, fisheries harvest flying fish roe, which may in the future lead to ecosystem damage.…	0	https://doi.org/10.1016/j.marpol.2011.09.003
440	SDG2: Zero hunger	No-take estuarine-protected areas: The missing armour for the conservation of fishes	1	The focus of conservation attention over the past few decades has been on marine-protected areas (MPAs) providing protection for heavily exploited marine fish species. Although some estuaries are included in most large MPAs, specific attention on the protection needs of fish species in estuaries has been lacking. Furthermore, many of the estuaries located within conservation areas are open to ang…	1	https://doi.org/10.4102/koedoe.v62i1.1648
441	SDG2: Zero hunger	The protection effects of marine protected areas on exploited molluscs from an oceanic archipelago	1	Limpets are one of the most successful intertidal algal grazers in the north-eastern Atlantic. They provide valuable ecosystem services, playing a pivotal role in maintaining rocky shore ecological balance and have an important economic value, being subject to high levels of exploitation in several oceanic archipelagos. Limpets represent one of the most profitable economic activities of small-sca…	1	https://doi.org/10.1002/aqc.3285
442	SDG2: Zero hunger	Implications of Macroalgal Isolation by Distance for Networks of Marine Protected Areas	1	The global extent of macroalgal forests is declining, greatly affecting marine biodiversity at broad scales through the effects macroalgae have on ecosystem processes, habitat provision, and food web support. Networks of marine protected areas comprise one potential tool that may safeguard gene flow among macroalgal populations in the face of increasing population fragmentation caused by pollutio…	1	https://doi.org/10.1111/cobi.12203
443	SDG2: Zero hunger	Assessing the Contribution of Marine Protected Areas to the Trophic Functioning of Ecosystems: A Model for the Banc d'Arguin and the Mauritanian Shelf	1	Most modelling studies addressed the effectiveness of marine protected areas (MPA) for fisheries sustainability through single species approach. Only a few models analysed the potential benefits of MPAs at the ecosystem level, estimating the potential export of fish biomass from the reserve or analysing the trophic relationships between organisms inside and outside the MPA. Here, we propose to us…	1	https://doi.org/10.1371/journal.pone.0094742
444	SDG2: Zero hunger	A Regional-Scale Ocean Health Index for Brazil	1	Brazil has one of the largest and fastest growing economies and one of the largest coastlines in the world, making human use and enjoyment of coastal and marine resources of fundamental importance to the country. Integrated assessments of ocean health are needed to understand the condition of a range of benefits that humans derive from marine systems and to evaluate where attention should be focu…	1	https://doi.org/10.1371/journal.pone.0092589
445	SDG2: Zero hunger	Trophic ecology of the gopher rockfish Sebastes carnatus inside and outside of central California marine protected areas	0	Marine protected areas (MPAs) can potentially alter food web dynamics by increasing the density of fishes within their borders. Such increases in the density of potential competitors can cause generalist predators to contract the scope of their diets. This study investigated the effects of increased conspecific fish density on the diets of gopher rockfish Sebastes carnatus at a 35 yr old MPA in P…		https://doi.org/10.3354/meps11420
446	SDG2: Zero hunger	First description of seagrass meadows from Fernando de Noronha archipelago in the tropical Southwestern Atlantic	0	Global challenges for seagrass conservation include increasing societal recognition of the importance of seagrass and assessing its distribution and status. We present the first characterization of a Halodule wrightii meadow in the Fernando de Noronha Archipelago, Brazil. The seagrass was registered in Sueste Bay, which is the most sheltered coastal environment of the archipelago and is also wher…		https://doi.org/10.1016/j.aquabot.2020.103305
447	SDG2: Zero hunger	The future of marine biodiversity and marine ecosystem functioning in UK coastal and territorial waters (including UK Overseas Territories) - with an emphasis on marine macrophyte communities	0	Marine biodiversity and ecosystem functioning including seaweed communities - in the territorial waters of the UK and its Overseas Territories are facing unprecedented pressures. Key stressors are changes in ecosystem functioning due to biodiversity loss caused by ocean warming (species replacement and migration, e.g. affecting kelp forests), sea level rise (e.g. loss of habitats including salt m…		https://doi.org/10.1515/bot-2018-0076
448	SDG2: Zero hunger	A global assessment of human effects on coral reefs	0	Coral reefs have been used by humans as recreation areas and as a source of food and other products for thousands of years. The effects of humans on coral reefs are not well understood, especially on a regional or global scale, A special survey protocol called Reef Check was designed to be used by volunteer recreational divers, trained and led by marine scientists, and based on the use of high va…	0	https://doi.org/10.1016/S0025-326X(99)00002-8
449	SDG2: Zero hunger	Complex movement patterns by foraging loggerhead sea turtles outside the breeding season identified using Argos-linked Fastloc-Global Positioning System	0	We used Argos-linked Fastloc-Global Positioning System (Argos-linked Fastloc-GPS) satellite tags to investigate how loggerhead sea turtles use neritic foraging habitats at multiple scales. Out of 24 turtles, six individuals used more than one foraging site, with all sites being separated by >25 km. These six individuals used up to four sites, remaining at each site for a mean of 150 days and retu…		https://doi.org/10.1111/maec.12489
450	SDG2: Zero hunger	Explicitly incorporating socioeconomic criteria and data into marine protected area zoning	1	Addressing community needs or aspirations is critical for the success of marine protected areas (MPAs). However MPA design based on the results of systematic conservation planning tools alone does not fully represent important information on socioeconomic factors. This is because of the reliance of conservation planning tools on spatial data which is better suited to ecological rather than socioe…	1	https://doi.org/10.1016/j.ocecoaman.2015.08.018
451	SDG2: Zero hunger	Larval nutritional mode and swimming behaviour in ciliated marine larvae	0	Swimming propagules (embryos and larvae) are a critical component of the life histories of benthic marine animals. Larvae that feed (planktotrophic) have been assumed to swim faster, disperse farther and have more complex behavioural patterns than non-feeding (lecithotrophic) larvae. However, a number of recent studies challenge these early assumptions, suggesting a need to revisit them more form…	0	https://doi.org/10.1017/S0025315418001091
452	SDG2: Zero hunger	The potential to integrate blue carbon into MPA design and management	0	Oceans and coasts provide a wide array of services to humans, including climate regulation, food security, and livelihoods. Managing them well is vital to human well-being as well as the maintenance of marine biodiversity and ocean-dependent economies. Carbon sequestration and storage is increasingly recognized as a valuable service provided by coastal vegetation. Carbon sequestered and stored by…	0	https://doi.org/10.1002/aqc.2809
453	SDG2: Zero hunger	Ontogeny versus environmental forcing off the Southwest Atlantic Ocean: Nutritional condition of Fuegian sprat (Sprattus fuegensis) early stages	0	The Fuegian sprat, Sprattus fuegensis, plays a key trophic role in the Southwest Atlantic Ocean. Growth and survival of small pelagic fishes like sprat are strongly affected by environmental variability and can determine recruitment success. We estimated the nucleic acid composition and assessed with a standardized RNA/DNA index (sRD) the nutritional condition of 273 larvae, metamorphosing, and j…		https://doi.org/10.1111/fog.12543
454	SDG2: Zero hunger	Feeding ecology of the long finned pilot whale, Globicephala melas edwardii, in the southwestern Atlantic Ocean, determined by stable isotopes analysis	0	Cetaceans are known to play an important role in ecosystem structure and dynamics because they occupy the highest position in food webs. In order to improve our knowledge on the feeding ecology of the long finned pilot whale, Globicephala melas edwardii, in the western South Atlantic Ocean, we analyzed carbon (delta C-13) and nitrogen (delta N-15) stable isotope composition of bone collagen from …		https://doi.org/10.1007/s00300-021-02908-2
455	SDG2: Zero hunger	Using marine reserves to manage impact of bottom trawl fisheries requires consideration of benthic food-web interactions	0	Marine protected areas (MPAs) are widely used to protect exploited fish species as well as to conserve marine habitats and their biodiversity. They have also become a popular management tool for bottom trawl fisheries, a common fishing technique on continental shelves worldwide. The effects of bottom trawling go far beyond the impact on target species, as trawls also affect other components of th…		https://doi.org/10.1002/eap.1360
456	SDG2: Zero hunger	Evaluating marine spatial closures with conflicting fisheries and conservation objectives	0	1. Spatial management is used extensively in natural resource management to address sustainability and biodiversity issues, for example through declaration of terrestrial National Parks and marine protected areas (MPAs). 2. Spatial management is used also to optimize yields or protect key parts of the life cycle of species that are utilized (hunted, farmed or fished), for example through rotation…	0	https://doi.org/10.1111/1365-2664.12110
457	SDG2: Zero hunger	Connectivity corridor conservation: A conceptual model for the restoration of a changing Gulf of Mexico ecosystem	1	The ability of the ocean to continue to sustain human society depends on adequate protections of its ecosystem function and services. Despite the establishment of marine protected areas, formal protection of critical connectivity corridors to link habitats and thereby maintain necessary demographic transitions in marine species under threat is now rare. Such protections are critical to future res…	1	https://doi.org/10.1525/elementa.016
458	SDG2: Zero hunger	Food supply depends on seagrass meadows in the coral triangle	1	The tropical seascape provides food and livelihoods to hundreds of millions of people, but the support of key habitats to this supply remains ill appreciated. For fisheries and conservation management actions to help promote resilient ecosystems, sustainable livelihoods, and food supply, knowledge is required about the habitats that help support fisheries productivity and the consequences of this…	1	https://doi.org/10.1088/1748-9326/9/9/094005
459	SDG2: Zero hunger	Stable isotope analysis of food sources sustaining the subtidal food web of the Yellow River Estuary	0	Estuarine food webs can be supported by local benthic or pelagic primary producers and by the import of organic matter. Until now, studies precisely quantifying the main energy sources in estuarine food webs have been limited for diverse species. The main pathway by which primary nutrients and energy are transported is not explicit and impedes conservation and restoration of estuarine ecosystems …		https://doi.org/10.1016/j.ecolind.2019.01.021
460	SDG2: Zero hunger	Differential Response of Fish Assemblages to Coral Reef-Based Seaweed Farming	0	As the global demand for seaweed-derived products drives the expansion of seaweed farming onto shallow coral ecosystems, the effects of farms on fish assemblages remain largely unexplored. Shallow coral reefs provide food and shelter for highly diverse fish assemblages but are increasingly modified by anthropogenic activities. We hypothesized that the introduction of seaweed farms into degraded s…	0	https://doi.org/10.1371/journal.pone.0118838
461	SDG2: Zero hunger	Fishing inside or outside? A case studies analysis of potential spillover effect from marine protected areas, using food web models	1	Marine protected areas (MPAs) are implemented worldwide as an efficient tool to preserve biodiversity and protect ecosystems. We used food web models (Ecopath and EcoTroph) to assess the ability of MPAs to reduce fishing impacts on targeted resources and to provide biomass exports for adjacent fisheries. Three coastal MPAs: Bonifacio and Port-Cros (Mediterranean Sea), and Bamboung (Senegalese coa…	1	https://doi.org/10.1016/j.jmarsys.2014.07.023
462	SDG2: Zero hunger	Biodiversity, coastal protection and resource endowment: Policy options for improving ocean health	1	The paper develops a production function for the Global Ocean Health Index (OHI) for 2013. Data from the Ocean Health Statistics, plus from the Human Development Index (HDI) for 151 countries are used. We employ two-stage regression model to conduct this evaluation. The Tobit model, used to obtain the estimated dependent variable, results show Coastal Protection, Livelihoods and Economies, Touris…	1	https://doi.org/10.1016/j.jpolmod.2018.02.002
463	SDG2: Zero hunger	Impacts of Marine Protected Areas on Fishing Communities	1	Marine protected areas (MPAs) are a popular conservation strategy, but their impacts on human welfare are poorly understood. To inform future research and policy decisions, we reviewed the scientific literature to assess MPA impacts on five indicators of human welfare: food security, resource rights, employment, community organization, and income. Following MPA establishment, food security genera…		https://doi.org/10.1111/j.1523-1739.2010.01523.x
464	SDG2: Zero hunger	Should phytoplankton be a key consideration for marine management?	0	Phytoplankton are an extremely important component of the functioning of ecosystems and climate regulation. Because concentrations of phytoplankton are highly patchy in both space and time, it is proposed that more consideration concerning the potential impact from human developments and activities on the service provision afforded by phytoplankton should be accounted for in marine management pro…	0	https://doi.org/10.1016/j.marpol.2018.08.026
465	SDG2: Zero hunger	Ecoregional scale seagrass mapping: A tool to support resilient MPA network design in the Coral Triangle	1	Seagrass beds are of exceptional economic, ecological and social value in the Coral Triangle. The large number of people who live close to the coast and rely directly on marine resources for food and income paradoxically increases the value of, but also the threats to, these ecosystems. A key strategy of the Coral Triangle Initiative is to protect shallow coastal ecosystems through the design and…	1	https://doi.org/10.1016/j.ocecoaman.2013.04.005
466	SDG2: Zero hunger	Size related dietary shifts of Epinephelus marginatus in a western Mediterranean littoral ecosystem: an isotope and stomach content analysis	0	The diet of the dusky grouper Epinephelus marginatus, from the Balearic Islands, western Mediterranean, consisted primarily of crustaceans, molluscs and fishes, but diet composition varied with body size. The smaller dusky groupers ( < 300 mm L(T)) fed primarily on crustaceans and particularly on brachyurans, which accounted for 46% of the prey identified. As dusky groupers grew, cephalopods beca…		https://doi.org/10.1006/jfbi.2002.2024
467	SDG2: Zero hunger	Meta-analysis review of fish trophic levels in marine protected areas based on stable isotope data	0	Stable isotopes (delta N-15) have been used to determine trophic levels in marine food webs. This study assessed if Marine Protected Areas (MPAs) affect the trophic levels of fishes based on stable isotopes in the western Mediterranean. A total of 22 studies including 600 observations were found and the final dataset consisted of 11 fish species and 146 observations comparing trophic levels insid…		https://doi.org/10.12681/mms.1628
468	SDG2: Zero hunger	The 'ghost of past fishing': Small-scale fisheries and conservation of threatened groupers in subtropical islands	1	Groupers are highly targeted and vulnerable reef fishes. The effects of fishing pressure on the density of three reef fishes were investigated in 21 islands outside (n=15) and inside (n=6) a Marine Protected Area (MPA) at the Paraty Bay, Brazilian southeastern coast. Two valued groupers (Epinephelus marginatus and Mycteroperca acutirostris) and a non-target grunt (Haemulon aurolineatum) were stud…	1	https://doi.org/10.1016/j.marpol.2016.10.002
469	SDG2: Zero hunger	Governance analysis of a community managed small-scale crab fishery in Madagascar: novel use of an empirical framework	1	The Marine Protected Area Governance (MPAG) framework was developed to offer a structured, empirical approach for analysing governance and has been applied to marine protected areas (MPAs) around the world. This study sees the novel application of the MPAG framework to a small-scale mangrove crab fishery in northwest Madagascar. The country typifies developing country environmental governance cha…	1	https://doi.org/10.1016/j.marpol.2017.11.022
470	SDG2: Zero hunger	Conserving Cuvier's beaked whales in the Alboran Sea (SW Mediterranean): Identification of high density areas to be avoided by intense man-made sound	0	Links between atypical mass strandings of beaked whales and military manoeuvres have been demonstrated in several parts of the Mediterranean, including the Alboran Sea. Herein, information on the distribution and abundance of Cuvier's beaked whales is presented for the Alboran Sea. Such information is of great importance to allow the impacts of mass strandings, entanglements, etc. to be put in a …		https://doi.org/10.1016/j.biocon.2014.07.018
471	SDG2: Zero hunger	Use of local knowledge in marine protected area management	1	For decades, fishermen in most parts of the world have been experiencing a reduction in fish abundances. Overexploitation and increasing demands are the glaring visible causes, but weakness or absence of fishery management is the core problem. Faced with repeated failure of fishery management and the resulting overexploitation in fish stocks, new management plans are needed in order to preserve b…	1	https://doi.org/10.1016/j.marpol.2013.10.004
472	SDG2: Zero hunger	Trophic role of the humpback whale (Megaptera novaeangliae) in the feeding area of Magellan Strait, Chile	0	The role of marine mammals in ecosystems has been evaluated mainly in species of high trophic level and results indicate that they influence the structure and functioning of biological communities. In this study the trophic role of the humpback whale was analyzed using an ecosystem model of the Francisco Coloane Coastal Marine Protected Area, Magellan Strait. The model was built with the Ecopath …		https://doi.org/10.1016/j.ecolind.2019.105796
473	SDG2: Zero hunger	The difference biocultural place makes to community efforts towards sustainable development: Youth participatory action research in a marine protected area of Colombia	1	The Latin American concept of (collective) biocultural heritage arose from Indigenous knowledge and practices with respect to local natural resources and environment, including the food being hunted, the crops being grown, and the landscapes being created. The term is now used more widely to describe community practices, goals and priorities that are determined, maintained and managed by diverse …	1	https://doi.org/10.1007/s11159-017-9690-x
474	SDG2: Zero hunger	Status, Institutions, and Prospects for Global Capture Fisheries	1	We compile global data to examine the current status, trends, threats, and opportunities in the world's wild-capture fisheries. We find that global fisheries have largely diverged-well-managed, often industrial fisheries tend to be in reasonably good health, while coastal fisheries, often from low-governance regions, tend to be in poor health. Good governance seems to play a central role, and we …	1	https://doi.org/10.1146/annurev-environ-101718-033310
475	SDG2: Zero hunger	Social impacts of marine protected areas in South Africa on coastal fishing communities	1	In South Africa, marine protected areas (MPAs) continue to be a favoured tool for biodiversity conservation and fisheries management. Efforts to expand the network of MPAs are contested largely due to historical injustices associated with MPA establishment and the ongoing social impacts linked with their current management and governance. This paper presents findings of recent research on the soc…	1	https://doi.org/10.1016/j.ocecoaman.2018.02.013
476	SDG2: Zero hunger	Spatial ecology and conservation of seabirds facing global climate change: a review	0	In this review we detail the impact of climate change on marine productivity, on marine environmental stochasticity and cyclicity, and on the spatio-temporal match-mismatch of seabirds and their prey. We thereby show that global warming has a profound bottom-up impact upon marine top-predators, but that such effects have to be studied in conjunction with the (top-down) impact of human fisheries u…	0	https://doi.org/10.3354/meps08212
477	SDG2: Zero hunger	Marine conservation may not deliver ecosystem services and benefits to all: Insights from Chilean Patagonia	1	Gains in biodiversity from marine conservation might not correlate with a fair distribution of benefits, situation that has been narrowly documented. We analyzed how different social actors perceived changes in ecosystem services (ESs) and benefits from marine conservation and explored barriers preventing access to benefits, based on the Marine Protected Area of Multiple Uses (MUMPA) Almirantazgo…	1	https://doi.org/10.1016/j.ecoser.2020.101170
478	SDG2: Zero hunger	Coral reef fish association with macroalgal beds on a tropical reef system in North-eastern Brazil	0	Macroalgal beds are recognised for their role as nursery and feeding grounds for several marine species. This study was conducted in the Tamandare reef complex within the limits of the Costa dos Corais Marine Protected Area (MPA), North-eastern Brazil. The macroalgal bed studied is subjected to several disturbances, especially from tourism. The reef fish were assessed with free dives during the d…		https://doi.org/10.1071/MF13054
479	SDG2: Zero hunger	Otter occupancy in the Cape Peninsula: Estimating the probability of river habitat use by Cape clawless otters, Aonyx capensis, across a gradient of human influence	0	The distribution of Cape clawless otters, Aonyx capensis, in South Africa and their habitat requirements in freshwater and marine systems has been well established. There is, however, a lack of information on how otters are adapting to urban development and the transformation of critical freshwater habitat. Within the Western Cape, the Cape Peninsula exhibits substantial variation in levels of hu…		https://doi.org/10.1002/aqc.2738
480	SDG2: Zero hunger	Designing a blueprint for coral reef survival	1	Maintaining coral reef ecosystems is a social imperative, because so many people depend on coral reefs for food production, shoreline protection, and livelihoods. The survival of reefs this century, however, is threatened by the mounting effects of climate change. Climate mitigation is the foremost and essential action to prevent coral reef ecosystem collapse. Without it, reefs will become extrem…	0	https://doi.org/10.1016/j.biocon.2021.109107
481	SDG2: Zero hunger	Marine protected areas in a welfare-based perspective	1	Assuming a broad set of fisheries management goals, this paper analyzes the implementation of a marine protected area (MPA) together with open access outside, applying a bioeconomic model that ensures unchanged growth post-MPA. Taking into account that conservation and restoration, food security, employment and social surplus are amongst the objectives that many managers include in fisheries mana…	1	https://doi.org/10.1016/j.marpol.2014.04.002
482	SDG2: Zero hunger	Nutritional condition of two coastal rocky fishes and the potential role of a marine protected area	0	Knowledge of the nutritional conditions of coastal commercial fish populations is key to understanding stock health status, and is essential when making reasonable exploitation and management plans. Here, we present the first results on the condition and feeding preferences of two coastal fish species, Diplodus sargus ( Linnaeus, 1758) and Pagellus erythrinus ( Linnaeus, 1758). Using stable isoto…		https://doi.org/10.1111/maec.12247
483	SDG2: Zero hunger	Arctic cephalopod distributions and their associated predators	0	Cephalopods are key species of the eastern Arctic marine food web, both as prey and predator. Their presence in the diets of Arctic fish, birds and mammals illustrates their trophic importance. There has been considerable research on cephalopods (primarily Gonatus fabricii) from the north Atlantic and the west side of Greenland, where they are considered a potential fishery and are taken as a by-…		https://doi.org/10.1111/j.1751-8369.2010.00146.x
484	SDG2: Zero hunger	Impact of feeding fish as a tourist attraction on a coral reef invertivorous fish's diet and growth	0	Tourism in marine environments is growing each year, especially in regions with attractive coastlines. One of the main activities practised by tourists is offering food, normally bread, to fish. This activity can result in negative impacts that are still not fully understood. Such impacts were previously detected among omnivores, but fish at other trophic levels also respond to feeding by humans.…		https://doi.org/10.1002/aqc.3398
485	SDG2: Zero hunger	Quiet(er) marine protected areas	0	A core task in endangered species conservation is identifying important habitats and managing human activities to mitigate threats. Many marine organisms, from invertebrates to fish to marine mammals, use acoustic cues to find food, avoid predators, choose mates, and navigate. Ocean noise can affect animal behavior and disrupt trophic linkages. Substantial potential exists for area-based manageme…	0	https://doi.org/10.1016/j.marpolbul.2015.09.012
486	SDG2: Zero hunger	Recreational fish feeding inside Brazilian MPAs: impacts on reef fish community structure	0	Although the practice of recreational feeding of fish by tourists is widespread within marine protected areas (MPAs), the ecological consequences of this activity have received little attention. This research aimed to investigate the influence of artificial feeding on reef fish communities of two Brazilian MPAs. Visual censuses were performed in areas not visited by tourists, in order to characte…		https://doi.org/10.1017/S0025315412000136
487	SDG2: Zero hunger	Population structure of Ctenochaetus striatus (Acanthuridae) in Tutuila, American Samoa: The use of size-at-age data in multi-scale population size surveys	0	We combined size-at-age and underwater survey (UVS) data to investigate the spatio-temporal distribution of life-history stages of the bristletooth surgeonfish. Ctenochaetus striatus, around Tutuila Island, American Samoa. Three age-based size categories (recruits, juveniles and adults) were determined by examining the relationship between size, age and gonad maturity. The results from combining …		https://doi.org/10.1016/j.fishres.2010.10.001
488	SDG2: Zero hunger	Overlap between vulnerable top predators and fisheries in the Benguela upwelling system: implications for marine protected areas	0	Industrial-scale fisheries are often thought to reduce food availability for top predators. It is essential to estimate the spatial and temporal overlap over a fine scale between fisheries and predators during their breeding season, when their energy demand is greatest and when they are most spatially constrained, in order to understand and manage this potential impact on their populations. In th…		https://doi.org/10.3354/meps08283
489	SDG2: Zero hunger	The price of success: integrative long-term study reveals ecotourism impacts on a flagship species at a UNESCO site	0	Disturbance of wildlife by ecotourism has become a major concern in the last decades. In the Mediterranean, sea-based tourism and related recreational activities are increasing rapidly, especially within marine protected areas (MPAs) hosting emblematic biodiversity. We investigated the impact of ecotourism in the Scandola MPA (UNESCO World Heritage Site, Corsica island), on the population of a co…		https://doi.org/10.1111/acv.12407
490	SDG2: Zero hunger	Coral reef health and management on the verge of a tourism boom: A case study from Miches, Dominican Republic	1	The Miches Municipality lies in the second poorest province in the Dominican Republic, and its inhabitants rely heavily on nearby coral reefs for food and livelihoods. With the sudden influx of tourism from the completion of a new highway, now is a crucial time to ensure that future tourist development in this region is locally driven and environmentally responsible. As coral reefs are a foundati…	1	https://doi.org/10.1016/j.ocecoaman.2017.01.023		note they report damage outside the MPA implying they found conditions inside the MPA better (?)
491	SDG2: Zero hunger	A typology of fisheries management tools: using experience to catalyse greater success	1	Fisheries provide nutrition and livelihoods for coastal populations, but many fisheries are fully or over-exploited and we lack an approach for analysing which factors affect management tool performance. We conducted a literature review of 390 studies to assess how fisheries characteristics affected management tool performance across both small-scale and large-scale fisheries. We defined success …	1	https://doi.org/10.1111/faf.12192
492	SDG2: Zero hunger	Improving social acceptability of marine protected area networks: A method for estimating opportunity costs to multiple gear types in both fished and currently unfished areas	0	We present a novel method for calculating the opportunity costs to fishers from their displacement by the establishment of marine protected areas (MPAs). We used a fishing community in Kubulau District, Fiji to demonstrate this method. We modelled opportunity costs as a function of food fish abundance and probability of catch, based on gear type and market value of species. Count models (includin…	0	https://doi.org/10.1016/j.biocon.2010.09.012
493	SDG2: Zero hunger	Butyltin contamination in Northern Chilean coast: Is there a potential risk for consumers?	0	Imposex is the superimposition of non-functionalmale sex organs in gastropod females. This syndrome is a hormonal imbalance induced by tributyltin (TBT) which have been used in antifouling paints formulation. The present study aimed to perform an integrated environmental assessment of imposex and butyltin (BT) contamination using surface sediments and tissues of Thaisella chocolata (an edible gas…	0	https://doi.org/10.1016/j.scitotenv.2017.03.264
494	SDG2: Zero hunger	Water Quality Assessment in The Occurrence of Acanthaster spp. (Crown-of-Thorns Starfish, CoTS) on Coral Reefs in Menjangan Island, Bali, Indonesia	0	Aquatic stressors are known to cause biological impairment that can result in biodiversity loss in several Marine Protected Areas (MPA), including in Menjangan Island, West Bali National Park. The objectives of this study were to correlate the changes in water quality parameters with the biological effect of Crown-of-Thorns starfish (CoTS) population dynamics and to assess the most applicable par…		https://doi.org/10.7454/mss.v24i3.1016
495	SDG2: Zero hunger	Variation in Octopus bimaculatus Verrill, 1883 diet as revealed through delta C-13 and delta N-15 stable isotope analysis: potential indirect effects of marine protected areas	0	Anthropogenic impacts on marine environments can be far-reaching and variable, and in an effort to mitigate these impacts, marine protected areas (MPAs) have been established globally. Indirect effects of MPAs on marine food webs and consumer behavior can be revealed through the diet of generalist predators, like octopuses, since their diet is a reflection of both preference and prey availability…
496	SDG2: Zero hunger	Determining natal sources of capelin in a boreal marine park using otolith microchemistry	0	The effectiveness of marine conservation areas are influenced by the structure of the food webs they encompass, including the population dynamics of potentially important forage species that occupy trophic positions between those of zooplankton and higher trophic levels. Capelin is a key forage species for marine mammals, seabirds, and fish in the Saguenay-St. Lawrence Marine Park (SSLMP, Canada)…		https://doi.org/10.1093/icesjms/fsw104
497	SDG2: Zero hunger	Protecting the global ocean for biodiversity, food and climate	1	The ocean contains unique biodiversity, provides valuable food resources and is a major sink for anthropogenic carbon. Marine protected areas (MPAs) are an effective tool for restoring ocean biodiversity and ecosystem services(1,2), but at present only 2.7% of the ocean is highly protected(3). This low level of ocean protection is due largely to conflicts with fisheries and other extractive uses.…	1	https://doi.org/10.1038/s41586-021-03371-z
498	SDG2: Zero hunger	Patterns in fish biodiversity associated with temperate reefs on the southeastern US continental shelf	0	Temperate reef fishes provide many benefits to humans including food, sport, and ecotourism, yet remain severely understudied compared to coral reef fishes in tropical environments. We used 3 years of underwater video data (n = 4130 samples) from hardbottom reefs along the continental shelf of the southeastern US Atlantic coast (i.e., North Carolina to Florida; ~ 100,000 km(2)) to quantify the sp…		https://doi.org/10.1007/s12526-019-00981-9
499	SDG2: Zero hunger	Distribution, ecology and morphology of Lytocarpia myriophyllum (Cnidaria: Hydrozoa), a Mediterranean Sea habitat former to protect	0	In the Mediterranean Sea, as well as in other parts of the word, intense bottom trawling threatens deep and mesophotic assemblages, compromising mainly the survivorship of erect organisms and of the habitat complexity they shape. Protection of species able to affect their habitats, by increasing spatial complexity and enhancing interspecific interactions, is crucial for biodiversity conservation.…		https://doi.org/10.1007/s10531-013-0449-9
500	SDG2: Zero hunger	Modeling trophic interactions to assess the effects of a marine protected area: case study in the NW Mediterranean Sea	0	The present study describes the food web and evaluates the effects of a marine protected area (MPA), the Port-Cros National Park (NW Mediterranean Sea), on the marine ecosystem inside the reserve and its potential to sustain resources outside the reserve. We built an Ecopath model of the Port-Cros MPA which comprised 41 functional groups and represented an average situation for the period 1998 to…		https://doi.org/10.3354/meps09701
501	SDG2: Zero hunger	Marine Protected Areas in the Coral Triangle: Progress, Issues, and Options	1	The six Coral Triangle countriesIndonesia, Malaysia, Papua New Guinea, Philippines, Solomon Islands, and Timor-Lesteeach have evolving systems of marine protected areas (MPAs) at the national and local levels. More than 1,900 MPAs covering 200,881km(2) (1.6% of the exclusive economic zone for the region) have been established within these countries over the last 40years under legal mandates that …	1	https://doi.org/10.1080/08920753.2014.878177
502	SDG2: Zero hunger	Multidimensional tracking of giant Pacific octopuses in northern Japan reveals unexpected foraging behaviour	0	Most marine populations are in decline (Pauly, 2000: Leon 2003) and reports of stable or increasing stocks are viewed with some scepticism (Myers and Worm, 2003). Compensation for decreasing fish stocks by cephalopod populations has been theorized and reported (O'Dor, 1998; Chotiyaputta et al, 2002). Around Hakkaido Island (northern Japan), catch per unit effort (CPUE) of Enteroctopus dofleini is…		https://doi.org/10.4031/002533205787521730
503	SDG2: Zero hunger	Marine protected areas and fisheries: bridging the divide	1	1. Long-term and well-managed marine protected areas (MPAs) can, under the right circumstances, contribute to biodiversity conservation and fisheries management, thus contributing to food security and sustainable livelihoods. 2. This article emphasizes (1) the potential utility of MPAs as a fisheries management tool, (2) the costs and benefits of MPAs for fishing communities, and (3) the foundati…	1	https://doi.org/10.1002/aqc.2514
504	SDG2: Zero hunger	Ultralight aircraft surveys reveal marine turtle population increases along the west coast of Reunion Island	0	Reunion Island in the south-west Indian Ocean once had significant nesting populations of marine turtles but they declined rapidly after human colonization. In 1996, after regular sightings of turtles offshore, an aerial survey programme was initiated to monitor the occurrence of marine turtles and their distribution along the west coast of the island Between 1998 and 2008, along a 30-km coastlin…		https://doi.org/10.1017/S003060530999072X
505	SDG2: Zero hunger	Fishing livelihoods as key to marine protected areas: insights from the World Parks Congress	1	1. Marine protected areas (MPAs) have become a widely used tool for marine conservation and fisheries management. In coastal areas, it has become clear that the success of MPAs, and the achievement of sustainable fishery production, requires a combination of effective management and conservation frameworks, maintenance of decent fisheries livelihoods, and a governance system that allows for effec…	1	https://doi.org/10.1002/aqc.2648
506	SDG2: Zero hunger	Effect of marine protected areas (MPAs) on consumer diet: MPA fish feed higher in the food chain	1	Marine protected areas (MPAs) are often established to mitigate the effects of overfishing and other human disturbances. In Fiji, these are locally managed and, where enforced, have significantly higher coral cover, higher fish biomass, and lower seaweed cover than the adjacent unprotected reefs (non-MPAs). We investigated how the isotopic signatures of a common mid-level consumer, Epinephelus me…	0	https://doi.org/10.3354/meps11487
507	SDG2: Zero hunger	Lipids classes, fatty acids, and sterols in seafood from gilbert bay, southern Labrador	0	Seafood from Gilbert Bay, southern Labrador, was sampled for lipid classes, fatty acid, and sterol composition. Gilbert Bay is a proposed Marine Protected Area, and the composition of seafood from this region is interesting from both human health and ecological perspectives. Analyses included four species of bivalves and flesh and liver samples from four fish species. Lipids from a locally isolat…		https://doi.org/10.1021/jf034820h
508	SDG2: Zero hunger	Managing Local Stressors for Coral Reef Condition and Ecosystem Services Delivery Under Climate Scenarios	0	Coral reefs provide numerous ecosystem goods and services, but are threatened by multiple environmental and anthropogenic stressors. To identify management scenarios that will reverse or mitigate ecosystem degradation, managers can benefit from tools that can quantify projected changes in ecosystem services due to alternative management options. We used a spatially-explicit biophysical ecosystem …	0	https://doi.org/10.3389/fmars.2018.00425
509	SDG2: Zero hunger	Seaweed farming collapse and fast changing socio-ecosystems exacerbated by tourism and natural hazards in Indonesia: A view from space and from the households of Nusa Lembongan island.	0	The culture of seaweed for the food and cosmetics industry is central to many rural households in Indonesia. The activity has vastly expanded in the past three decades, but in some cases, an opposite trend is now emerging. Spaceborne images were used to monitor the recent collapse of seaweed farming around the small island of Nusa Lembongan, Bali, Indonesia. A simple semi-quantitative Seaweed Far…	0	https://doi.org/10.1016/j.ocecoaman.2021.105586
510	SDG2: Zero hunger	Local and remote physical processes driving variability of the planktonic system in the Juan Fernandez Archipelago: A multidisciplinary framework providing conservation insights	0	The Juan Fernandez Ridge, a vulnerable marine ecosystem located far off the coast of central Chile and formed by several seamounts, guyots and three islands (Robinson Crusoe, Santa Clara and Alejandro Selkirk), has recently been declared a Coastal Marine Protected Area of Multiple Uses with several National Parks embedded in it. 2. Recent studies have highlighted the influence of remote and local…		https://doi.org/10.1002/aqc.3499
511	SDG2: Zero hunger	Sustainability: A flawed concept for fisheries management?	0	The concept of sustainable fishing is well ingrained in marine conservation and marine governance. However, I argue that the concept is deeply flawed; ecologically, socially and economically. Sustainability is strongly related, both historically and currently, to maximum long-term economic exploitation of a system. Counter-intuitively, in fisheries, achieving this economic exploitation often reli…	0	https://doi.org/10.1525/elementa.346
512	SDG2: Zero hunger	Simulation of the combined effects of artisanal and recreational fisheries on a Mediterranean MPA ecosystem using a trophic model	0	Marine protected areas (MPAs) have the potential to enhance the long-term sustainability of coastal resources, and the artisanal fisheries which depend on them. However, recreational fisheries, which are increasing their impacts on coastal resources worldwide, may reduce the benefits that MPAs provide to declining artisanal fisheries. Here we used the Bonifacio Straits Natural Reserve (BSNR) Cors…	0	https://doi.org/10.3354/meps08679
513	SDG2: Zero hunger	Building the future of MPAs - lessons from history	0	1. Marine protected areas (MPAs) have a long history, originating in traditional and cultural initiatives often focused on reserving resources for food security. A handful of 'parks' were established between the 1870s and 1940s and, following World War II, increased awareness of threats to the ocean led to global programmes that started in the 1970-1980s. 2. Initially IUCN became the leader, pilo…	0	https://doi.org/10.1002/aqc.2680
514	SDG2: Zero hunger	Modelling and mapping resource overlap between seabirds and fisheries on a global scale: a preliminary assessment	0	Coexistence of foraging seabirds and operating fisheries may result in interactions such as competition for the same prey resources. We used GIS-based modelling at a scale of 0.5 x 0.5 degrees spatial cells to: (1) map the foraging distribution of seabirds; (2) predict their annual food consumption rates in a spatially explicit manner; and (3) estimate a spatially explicit seabird -fisheries over…		https://doi.org/10.3354/meps06860
515	SDG2: Zero hunger	On the use of optical remote sensing to assess phytoplankton biomass dynamics in the Pelagos Sanctuary (Ligurian-Provencal Sea)	0	If Marine Protected Areas (MPAs) are to aid in protecting and conserving marine ecosystems in the face of extensive and severe impacts of human activities, underpinning scientific knowledge and understanding of MPAs are imperative. This study aims to describe and evaluate phytoplankton dynamics in a pelagic Mediterranean MPA (The Pelagos International Marine Mammals Sanctuary) in the northwestern…		https://doi.org/10.1016/j.rsma.2017.03.001
516	SDG2: Zero hunger	Fishermen's local ecological knowledge on Southeastern Brazilian coastal fishes: contributions to research, conservation, and management	0	We analyzed fishermen's local ecological knowledge (LEK) about the feeding habits, trophic interactions, habitats, fishing grounds, migration, and reproduction of nine coastal fishes in Buzios Island, southeastern Brazilian coast. We interviewed 39 fishermen using standardized questionnaires. Fishermen's LEK on habitat use and trophic interactions for the studied fishes agreed with the scientific…		https://doi.org/10.1590/S1679-62252012000100013
517	SDG2: Zero hunger	Fine-scale movement and assimilation of carbon in saltmarsh and mangrove habitat by resident animals	0	Despite theories of large-scale movement and assimilation of carbon in estuaries, recent evidence suggests that in some estuaries much more limited exchange occurs. We measured the fine-scale movement and assimilation of carbon by resident macroinvertebrates between adjacent saltmarsh and mangrove habitats in an Australian estuary using delta(13)C analysis of animals at different distances into a…		https://doi.org/10.1007/s10452-004-0442-1
518	SDG2: Zero hunger	Conservation and management of ornamental coral reef wildlife: Successes, shortcomings, and future directions	0	Trade in ornamental coral reef wildlife supports a multi-million dollar industry but in some places threatens vulnerable coral reef species and ecosystems due to unsustainable practices and lack of effective regulation. To supply this trade, fishers sometimes deplete fish populations and rely on practices, such as cyanide fishing, that harm coral reef organisms and habitats. The number of countri…	0	https://doi.org/10.1016/j.biocon.2013.11.025
519	SDG2: Zero hunger	Is Canada fulfilling its obligations to sustain marine biodiversity? A summary review, conclusions, and recommendations	0	Canada has made numerous national and international commitments to sustain marine biodiversity. Given current and potential threats to biodiversity from climate change, fisheries, and aquaculture, we provide a summary review of Canada's progress in fulfilling its obligations to protect, conserve, recover, and responsibly exploit marine biodiversity. We conclude that Canada has made little substan…	0	https://doi.org/10.1139/er-2012-0049
520	SDG2: Zero hunger	Spatial gradients of spring zooplankton assemblages at the open ocean sub-Antarctic Namuncura Marine Protected Area/Burdwood Bank, SW Atlantic Ocean	0	The sub-Antarctic Namuncura Marine Protected Area at Burdwood Bank (NMPA/BB) is an area of favorable conditions for the development of planktonic organisms and the sustenance of numerous species of ecological importance. The current study aimed to evaluate the spatial distribution of the abundance, biomass, community structure, and functional diversity of the mesozooplankton from the NMPA/BB duri…		https://doi.org/10.1016/j.jmarsys.2020.103398
521	SDG2: Zero hunger	Advances in assessing Sabellaria spinulosa reefs for ongoing monitoring	0	Standardized and repeatable data acquisition and analyses are required to enable the mapping and condition monitoring of reefs within Marine Protected Areas (MPAs). Changes in habitat condition must be reliably identified and reported to best support evidence-based management. Biogenic reefs in temperate waters, that is, hard matter created by living organisms and raised above the seabed, provide…		https://doi.org/10.1002/ece3.4292
522	SDG2: Zero hunger	Anthropogenic effects on reproductive effort and allocation of energy reserves in the Mediterranean octocoral Paramuricea clavata	0	In order to better understand the sources, patterns and consequences of anthropogenic effects on populations of the Mediterranean gorgonian Paramuricea clavata, we examined the proportion of injured colonies among populations exposed to a combination of anthropogenic disturbances (recreational cast fishing, commercial lobster pots, gill nets and SCUBA diving), as well as the physiological respons…		https://doi.org/10.3354/meps09521
523	SDG2: Zero hunger	Clear regression of harvested intertidal mollusks. A 20-year (1994-2014) comparative study	0	Intertidal mollusks are subjected to an intense environmental pressure, from human-induced stressors, mainly harvesting, to competition for food and space with other species. Here we used mollusk shell size as a measure of size distribution and reproductive potential of intertidal limpets. Two species of exploited limpets (Patella candei crenata and Patella aspera) were monitored throughout the l…		https://doi.org/10.1016/j.marenvres.2015.11.003
524	SDG2: Zero hunger	Characteristics of juvenile survivors reveal spatio-temporal differences in early life stage survival of Baltic cod	0	The spatio-temporal origin of surviving juvenile Baltic cod Gadus morhua was investigated by coupling age information from otolith microstructure analysis and hydrodynamic modeling, which allowed backtracking of drift routes in time and space. The suitability of hydrodynamic modeling for drift simulations of early life stages of Baltic cod up to the pelagic juvenile stage was validated by compari…		https://doi.org/10.3354/meps10875
525	SDG2: Zero hunger	Feeding - Cleaning Trade-Off: Manta Ray Decision-Making as a Conservation Tool	0	Identifying critical aggregation sites and behavioral patterns of imperiled species contributes to filling knowledge gaps essential for their conservation. Manta rays present a prominent example of such species, the populations of which are declining globally due to directed fishery, by-catch, and other anthropogenic stressors. Our goal was to explore manta ray aggregation sites in the Philippine…		https://doi.org/10.3389/fmars.2019.00088
526	SDG2: Zero hunger	Effects of fish feeding by snorkellers on the density and size distribution of fishes in a Mediterranean marine protected area	0	Although there is a great deal of evidence to show that supplementary feeding by humans in terrestrial environments causes pronounced changes in the distribution and behaviour of wild animals, at present very little is known about the potential for such effects on marine fish. This study evaluated the consequences of feeding by snorkellers on fish assemblages in the no-take area of the Ustica Isl…		https://doi.org/10.1007/s00227-004-1527-z
527	SDG2: Zero hunger	American Oystercatcher benefits from a heterogeneous landscape to breed in an urbanized area in southern Brazil	0	Urbanization is a major form of landscape transformation that often results in habitat degradation and loss for birds. However, effects on avian populations are trait- and context-dependent, and persistence at urban patches is likely to be a function of habitat availability at the landscape scale. Here, we aimed to assess the breeding performance and foraging ecology of a widespread shorebird, th…		https://doi.org/10.1007/s11252-021-01123-5
528	SDG2: Zero hunger	Paying the price to solve fisheries conflicts in Brazil's Marine Protected Areas	0	Ecosystems services (ES) provide food and recreation to humans, but are fast being degraded. Marine Protected Areas (MPAs) have been proposed as a way to protect some of these ES, but decisions regarding what gets protection and what gets consumed can be a source of conflicts. One such example is the Fernando de Noronha MPA (Brazil), where there is a conflict between shark-directed tourism and fi…	0	https://doi.org/10.1016/j.marpol.2018.03.016
529	SDG2: Zero hunger	The effects of marine protected areas on ecosystem recovery and fisheries using a comparative modelling approach	0	The overexploitation of many marine resources and ecosystems calls for the development and implementation of measures to support their recovery and conservation. The potential contributions to support fisheries and ecosystem recovery were assessed at the local level of the three multiple-use marine protected areas (MPAs) of Cerbere-Banyuls, Medes Islands, and Cap de Creus, located in the north-we…	0	https://doi.org/10.1002/aqc.3368
530	SDG2: Zero hunger	My island home: place-based integration of conservation and public health in Oceania	1	Oceania can be characterized by a richness of culture, biodiversity and natural resources and a particular future that the changing climate will bring to islands, livelihoods and ecosystems. We reviewed literature detailing the limitations of siloed approaches to public health and conservation action for regional sustainability, highlighting opportunities for regional integration as place-based, …	1	https://doi.org/10.1017/S0376892918000061
531	SDG2: Zero hunger	Like the plains people losing the buffalo: perceptions of climate change impacts, fisheries management, and adaptation actions by Indigenous peoples in coastal British Columbia, Canada	1	Rapidly developing and complex climate change impacts have profound implications for coastal communities, demanding adaptation actions for both social and ecological systems. Along the coast of British Columbia, Canada, Indigenous peoples developed a tightly coupled social-ecological system that was interrupted by the arrival of settler colonialism in the 1800s. Although both climate change adapt…	1	https://doi.org/10.5751/ES-12027-250433
532	SDG2: Zero hunger	Fisheries refugia: a novel approach to integrating fisheries and habitat management in the context of small-scale fishing pressure	1	Fisheries of the South China Sea, including the Gulf of Thailand, are characterised by high levels of small-scale fishing effort. Increasing fishing pressure, coupled with continued decline in the expanse and quality of coastal habitats critical to the life-cycles of most species, has raised serious concerns regarding the long-term sustainability of Southeast Asian fisheries. This paper reviews t…	1	https://doi.org/10.1016/j.ocecoaman.2012.12.001
533	SDG2: Zero hunger	Rapid declines across Australian fishery stocks indicate global sustainability targets will not be achieved without an expanded network of 'no-fishing' reserves	0	A continuing debate between environmental scientists and fisheries biologists on the sustainability of fisheries management practices, and the extent of fishing impacts on marine ecosystems, is unlikely to be resolved without fishery-independent data spanning large geographic and temporal scales. Here, we compare continental- and decadal-scale trends in fisheries catches with underwater reef moni…	0	https://doi.org/10.1002/aqc.2934
534	SDG2: Zero hunger	Social capital as a key determinant of perceived benefits of community-based marine protected areas	1	Globally, marine protected areas (MPAs) have been relatively unsuccessful in meeting biodiversity objectives. To be effective, they require some alteration of people's use and access to marine resources, which they will resist if they do not perceive associated benefits. Stakeholders' support is crucial to ecological success of MPAs, and their support is likely to depend on their capacity to adap…	1	https://doi.org/10.1111/cobi.12808
535	SDG2: Zero hunger	Habitat type and nursery function for coastal marine fish species, with emphasis on the Eastern Cape region, South Africa	0	A considerable amount of research has been undertaken to document and assess the nursery function of a variety of coastal habitats for marine fish species around the world. Most of these studies have focused on particular habitats and have generally been confined to a limited range of fish species associated with specific nursery areas. In this review we conduct a general assessment of the state …		https://doi.org/10.1016/j.ecss.2015.04.002
536	SDG2: Zero hunger	Habitat use and preliminary demographic evaluation of the critically endangered Mediterranean monk seal (Monachus monachus) in the Cilician Basin (Eastern Mediterranean)	0	Over the last few decades a dramatic decline in the number of Mediterranean monk seals (Monachus monachus) limited scientific studies on the biology.. behaviour, and ecology of the species. This lack of information impaired the effectiveness of conservation strategies. Thus, any further information gathered on the monk seal has utmost value in the work to halt and reverse the plight of the specie…	0	https://doi.org/10.1016/S0006-3207(03)00234-9
537	SDG2: Zero hunger	Mapping Antarctic Suspension Feeder Abundances and Seafloor Food-Availability, and Modeling Their Change After a Major Glacier Calving	0	Seafloor communities are a critical part of the unique and diverse Antarctic marine life. Processes at the ocean-surface can strongly influence the diversity and abundance of these communities, even when they live at hundreds of meters water depth. However, even though we understand the importance of this link, there are so far no quantitative spatial predictions on how seafloor communities will …		https://doi.org/10.3389/fevo.2018.00094
538	SDG2: Zero hunger	A Global Plankton Diversity Monitoring Program	0	Plankton are the base of marine food webs, essential to sustaining fisheries and other marine life. Continuous Plankton Recorders (CPRs) have sampled plankton for decades in both hemispheres and several regional seas. CPR research has been integral to advancing understanding of plankton dynamics and informing policy and management decisions. We describe how the CPR can contribute to global plankt…	0	https://doi.org/10.3389/fmars.2019.00321
539	SDG2: Zero hunger	Habitat use of five key species of reef fish in rocky reef systems of southern Brazil: evidences of MPA effectiveness	0	Species functional behaviors amidst the food web, such as feeding ecology in ecosystems, are directly connected to their habitat preferences and use. In reef ecosystems, groupers and sea bass are considered key species, as top-down controllers, regulating the trophic levels on which they feed. Moreover, they are a diversified group of actinopterygian fishes, ranging from 7 to 250cm of total lengt…	0	https://doi.org/10.1007/s12526-018-0893-6
540	SDG2: Zero hunger	Representing species distributions in spatially-explicit ecosystem models from presence-only data	0	Spatially-explicit ecosystem models are increasingly considered for informing fisheries management. The inputs of these models that determine species distributions in the modeled system are critical. There is a need for methods to estimate species distributions in spatially-explicit ecosystem models from presence-only data. To address this need, we used a method relying on binomial generalized ad…	0	https://doi.org/10.1016/j.fishres.2018.10.011
541	SDG2: Zero hunger	Inuit food security in canada: arctic marine ethnoecology	1	Quantitative Seascape Ethnoecology practice is considered through a community-based food security lens. Fish and marine mammal records obtained from a wide range of Inuit co-management agreements are, for the first time combined to calculate an Inuit-culture marine ecological footprint, targeted on calendar year 2008. A reflexive, participatory and inclusive education/governance strategy for Arct…	1	https://doi.org/10.1007/s12571-017-0668-0
542	SDG2: Zero hunger	Marine Protected Area monitoring in the nearshore waters of Grenada, Eastern Caribbean: benthic cover and fish populations	0	Grenada is highly dependent on coral reefs as a source of food and to support tourism. Local and global environmental stressors threaten these reefs. Legislation was created for this MPA in 2001, permanent mooring buoys were deployed in 2009 and enforcement of fishing restrictions began in 2010. Initiatives to address point and nonpoint source pollution from the land have recently begun, aimed at…		https://doi.org/10.15517/rbt.v62i0.15922
543	SDG2: Zero hunger	Effects of natural barriers on the spillover of a marine mollusc: implications for fisheries reserves	0	1. The movement of organisms and dispersal of propagules is fundamental to the maintenance of populations over time. However, the existence of barriers, created through the spatial configuration of habitats, may significantly affect dispersal patterns and thus influence community dynamics and resource sustainability. 2. Within marine environments unstructured or open habitats may form partial or …	0	https://doi.org/10.1002/aqc.562
544	SDG2: Zero hunger	BRIDGING THE DIVIDE BETWEEN FISHERIES AND MARINE CONSERVATION SCIENCE	0	Researchers from traditionally disparate disciplines and practitioners with typically incongruent mandates have begun working together to better understand and solve marine conservation and sustainable yield problems. Conservation practitioners are recognizing the need to achieve conservation goals in seascapes that are a source of livelihood and food security, while fisheries management is reali…	0	https://doi.org/10.5343/bms.2010.1089
545	SDG2: Zero hunger	Testing trophic indicators of fishery health in California's marine protected areas for a generalist carnivore	0	Fisheries have historically focused on single-species management, but there is a global movement to incorporate ecosystem-based processes. Marine protected areas (MPAs) offer an important management tool for enhancing ecosystem structure and function. This study investigated whether a non-lethal indicator of trophic position (TP) could be used to evaluate fishery health in southern California MPA…		https://doi.org/10.1016/j.ecolind.2018.10.027
546	SDG2: Zero hunger	Community structure and trophic interactions in a coastal management and exploitation area for benthic resources in central Chile	0	Management and Exploitation Areas for Benthic Resources (MEABR) is the most common type of coastal marine protected area in Chile, being used for managing inshore benthic resources since 1991. The structure of the biological community in MEARBs are poorly studied and it is though that a better understanding of this framework is key to sustainability. Here we present a food web model to characteri…		https://doi.org/10.1016/j.ocecoaman.2015.10.003
547	SDG2: Zero hunger	Ecological connectivity and niche differentiation between two closely related fish species in the mangrove-seagrass-coral reef continuum	0	We aim to understand ontogenetic shifts in habitat use and feeding patterns by 2 fish species, Lutjanus fulviflamma and L. ehrenbergii, within a tropical seascape in East Africa. Stomach contents and stable isotope signatures of muscle tissues (delta C-13 and delta N-15) were compared between and within species. Fish of all life stages and potential food items were sampled from mangrove creeks, s…		https://doi.org/10.3354/meps10171
548	SDG2: Zero hunger	Effects of chronic bottom trawling on soft-seafloor macrofauna in the Kattegat	0	Impact studies of chronic bottom trawling aiming to reveal long-term effects on benthic organisms are often hampered by the lack of comparable untrawled conditions and the difficulty in assessing the spatial distribution of trawling intensity. We sampled soft-seafloor macrofauna over a precise trawling gradient in the Kattegat using hourly vessel monitoring systems and logbooks. The gradient incl…		https://doi.org/10.3354/meps12434
549	SDG2: Zero hunger	Definitions of overfishing from an ecosystem perspective	1	Ecosystem considerations may be incorporated into fisheries management by modifying existing overfishing paradigms or by developing new approaches to account for ecosystem structure and function in relation to harvesting. Although existing concepts of overfishing have a strong theoretical basis for evaluating policy choices and much practical use, they do not provide direct guidance on issues suc…	1	https://doi.org/10.1006/jmsc.2000.0738
550	SDG2: Zero hunger	Legacy persistent organic pollutants including PBDEs in the trophic web of the Ross Sea (Antarctica)	0	The ecological features of the Ross Sea trophic web are peculiar and different from other polar food webs, with respect to the use of habitat and species interactions; due to its ecosystem integrity, it is the world's largest Marine Protected Area, established in 2016. Polar organisms are reported to bioaccumulate lipophilic contaminant, viz persistent organic pollutants (POPS). Legacy POPs and f…		https://doi.org/10.1016/j.chemosphere.2017.07.054
551	SDG2: Zero hunger	Genetic diversity and connectivity in the East African giant mud crab Scylla serrata: Implications for fisheries management	0	The giant mud crab Scylla serrata provides an important source of income and food to coastal communities in East Africa. However, increasing demand and exploitation due to the growing coastal population, export trade, and tourism industry are threatening the sustainability of the wild stock of this species. Because effective management requires a clear understanding of the connectivity among popu…	0	https://doi.org/10.1371/journal.pone.0186817
552	SDG2: Zero hunger	Estimated flows and biomass in a no-take coral reef from the eastern tropical Pacific through network analysis	1	In the southern Gulf of California, the Cabo Pulmo reef has been the focus of many studies because it is the northern-most coral reef in the eastern Pacific. It is a paragon of a well-managed marine protected area. Under the assumption that fishing mortality is negligible, we want to identify and quantify major energy flows in an ecosystem without human intervention and describe the ecosystem res…	1	https://doi.org/10.1016/j.ecolind.2021.107359
553	SDG2: Zero hunger	Historical Trends of Sperm Whale (Physeter macrocephalus) Distribution in the Phoenix Archipelago	0	The Phoenix Archipelago in the Central Pacific is situated in what was once one of the most productive areas for capturing sperm whales (Physeter macrocephalus). These whales were the focal targets of American offshore whalers in the mid-19th century along the equator, an area known as the on-the-line whaling grounds. Now, as large-scale Marine Protected Areas (MPAs) have provided protection for …		https://doi.org/10.3389/fmars.2020.583326
554	SDG2: Zero hunger	Evaluation of the effects on rockfish and kelp artisanal fisheries of the proposed Mejillones Peninsula marine protected area (northern Chile, SE Pacific coast)	1	One shortcoming of marine protected areas (MPA) implementation is the potential for unintended consequences, such as fisheries effort displacement, that cause negative economic and social effects for fishermen and undermine social support for MPA implementation efforts. The objective of this work is to analyse the effects of a proposed MPA system on fisheries in a biodiversity conservation priori…	1	https://doi.org/10.1016/j.ecolmodel.2014.11.012
555	SDG2: Zero hunger	Organic matter recycling during a mucilage event and its influence on the surrounding environment (Ligurian Sea, NW Mediterranean)	0	The development of benthic mucilage in the Marine Protected Area of Portofino (Ligurian Sea) during the summer of 2009 was studied to verify the influence of this event on the surrounding environment (seawater and soft-bottom). The calm meteorological and sea conditions at the beginning of the time frame under consideration caused the thermal stratification of the water column. This stratificatio…		https://doi.org/10.1016/j.csr.2010.12.016
556	SDG2: Zero hunger	Integrated management to address the incidental mortality of seabirds in longline fisheries	0	1. Of the myriad of anthropogenic and natural threats to seabirds, one of the most critical global problems is incidental mortality in longline fisheries. Hesitance or failure by fishery managers and longline industries to adequately address this acute problem could result in the extinction of several albatross and petrel species within our lifetimes. 2. An integrated management approach is neede…	0	https://doi.org/10.1002/aqc.446
557	SDG2: Zero hunger	From sea sharing to sea sparing - Is there a paradigm shift in ocean management?	0	During the past decade, the apocalyptic rhetoric of dwindling ocean resources and the destruction of aquatic habitats in the ocean and along our coasts has motivated conservationist, scientists, international Non Governmental Organisations (NGOs) and several coastal states to advocate the separation of ever increasing ocean and coastal areas as Marine Protected Areas (MPAs) to allow for the resto…	0	https://doi.org/10.1016/j.ocecoaman.2015.07.004
558	SDG2: Zero hunger	Predicting suitable habitat for the cold-water coral Lophelia pertusa (Scleractinia)	0	Ecological-niche factor analysis (ENFA) was applied to the reef framework-forming cold-water coral Lophelia pertusa. The environmental tolerances of this species were assessed using readily available oceanographic data, including physical, chemical, and biological variables. L. pertusa was found at mean depths of 468 and 480 m on the regional and global scales and occupied a niche that included h…		https://doi.org/10.1016/j.dsr.2008.04.010
559	SDG2: Zero hunger	Global overview of the applications of the Ecopath with Ecosim modeling approach using the EcoBase models repository	0	The 'Ecopath', later expanded to 'Ecopath with Ecosim' ('EwE'), modeling approach has been applied to hundreds of ecosystems around the world, since its first implementation in 1984. The 'EcoBase' model repository was developed to gather EwE models published worldwide. For the 433 unique models documented in EcoBase, we compiled, standardized, and analyzed all available metadata describing critic…	0	https://doi.org/10.1016/j.ecolmodel.2015.01.025
560	SDG2: Zero hunger	A biodiversity survey of scavenging amphipods in a proposed marine protected area: the Filchner area in the Weddell Sea, Antarctica	0	An integrative inventory of the amphipod scavenging fauna (Lysianassoidea), combining morphological identifications with DNA barcoding, is provided here for the Filchner area situated in the south-eastern Weddell Sea. Over 4400 lysianassoids were investigated for species richness and relative abundances, covering 20 different stations and using different sampling devices, including the southernmo…		https://doi.org/10.1007/s00300-018-2292-7
561	SDG2: Zero hunger	Lessons From the Pacific Islands - Adapting to Climate Change by Supporting Social and Ecological Resilience	1	By necessity, Pacific Islands have become hubs of innovation, where climate strategies are piloted and refined to inform adaptation efforts globally. Pacific Island ecosystems are being degraded by pollution, overfishing, and unsustainable development. They also increasingly face severe climate impacts including sea-level rise, changing temperature and rainfall patterns. These impacts result inch…	1	https://doi.org/10.3389/fmars.2019.00289
562	SDG2: Zero hunger	The unintended consequences of 'responsible fishing' for small-scale fisheries: Lessons from the Pacific coast of Colombia	1	The 'Code of Conduct for Responsible Fisheries' developed by the United Nations Food and Agriculture Organisation has been central for the governance of fisheries. Most responsible fisheries initiatives are market driven and motivate transitions towards greener economies. These added-value fish economies have increasingly connected fishing grounds to external markets that demand high quality sust…	1	https://doi.org/10.1016/j.marpol.2017.12.005
563	SDG2: Zero hunger	Trophic resources and mercury exposure of two silvertip shark populations in the Northeast Pacific Ocean	1	Worldwide shark populations have experienced rapid declines over the last decades, mainly due to overfishing. Marine protected areas (MPAs) have thus become an indispensable tool for the protection of these marine predators. Two recently-created MPAs in the Northeast Pacific Ocean, the Revillagigedo National Park and Clipperton Atoll, are characterized by different trophic structures potentially …	1	https://doi.org/10.1016/j.chemosphere.2020.126645
564	SDG2: Zero hunger	Harvesting of the kelp Ecklonia maxima in South Africa affects its three obligate, red algal epiphytes	0	In South Africa, more than 7000 t (f wt) of kelp (Ecklonia maxima) fronds are harvested annually to feed cultured abalone. Carpoblepharis flaccida, Gelidium vittatum and Polysiphonia virgata are conspicuous red algal epiphytes on older kelps and provide habitat and food for numerous animals. Over 4.5 y, we examined the effects of one destructive harvest of E. maxima on these 3 epiphytes. Two 20 x…		https://doi.org/10.1007/s10811-006-9037-7
565	SDG2: Zero hunger	Distribution of Deep-Sea Sponge Aggregations in an Area of Multisectoral Activities and Changing Oceanic Conditions	0	Discovery and understanding of fragile deep-sea habitats like sponge aggregations, are being outpaced by anthropogenic resource exploitation. Sustainable ocean development in the Faroe-Shetland Channel Nature Conservation Marine Protected Area (FSC NCMPA; northeast Atlantic), which harbors sponge aggregations, now requires adaptive management in the face of encroachment of multisectorial activiti…		https://doi.org/10.3389/fmars.2019.00163
566	SDG2: Zero hunger	Climate resilience in marine protected areas and the 'Protection Paradox'	1	Restricting human activities through Marine Protected Areas (MPAs) is assumed to create more resilient biological communities with a greater capacity to resist and recover following climate events. Here we review the evidence linking protection from local pressures (e.g., fishing and habitat destruction) with increased resilience. Despite strong theoretical underpinnings, studies have only rarely…		https://doi.org/10.1016/j.biocon.2019.05.005
567	SDG2: Zero hunger	Effects of habitat, fishing, and fisheries management on reef fish populations in Palau	0	Palau has a rich tradition of fisheries management and stewardship of its waters, and as in many island nations, small-scale coral reef fisheries are a vital part of the local culture, economy, and food security. However, reef fisheries in Palau are data-poor and there is increasing concern that reef fish stocks are declining. To evaluate the current and future status of these resources, informat…	0	https://doi.org/10.1016/j.fishres.2021.105996
568	SDG2: Zero hunger	Spatial behavior of two coral reef fishes within a Caribbean marine protected area	0	A better understanding of the key ecological processes of marine organisms is fundamental to improving design and effective implementation of marine protected areas (MPAs) and marine biodiversity. The movement behavior of coral reef fish is a complex mechanism that is highly linked to species life-history traits, predation risk and food resources. We used passive acoustic telemetry to study month…		https://doi.org/10.1016/j.marenvres.2015.06.004
569	SDG2: Zero hunger	Spatial scale-dependent habitat heterogeneity influences submarine canyon macrofaunal abundance and diversity off the Main and Northwest Hawaiian Islands	0	The mapping of biodiversity on continental margins on landscape scales is highly relevant to marine spatial planning and conservation. Submarine canyons are widespread topographic features on continental and island margins that enhance benthic biomass across a range of oceanic provinces and productivity regimes. However, it remains unclear whether canyons enhance faunal biodiversity on landscape …		https://doi.org/10.1016/j.dsr2.2013.06.015
570	SDG2: Zero hunger	Beyond duplicity and ignorance in global fisheries	1	The three decades following World War II were a period of rapidly increasing fishing effort and landings, but also of spectacular collapses, particularly in small pelagic fish stocks. This is also the period in which a toxic triad of catch underreporting, ignoring scientific advice and blaming the environment emerged as standard response to ongoing fisheries collapses, which became increasingly m…	1	https://doi.org/10.3989/scimar.2009.73n2215
571	SDG2: Zero hunger	Some Implications of High Biodiversity for Management of Tropical Marine Ecosystems-An Australian Perspective	0	While high biodiversity has been widely reported from the tropics, we suggest that in reality there is a considerable underestimate of the total biodiversity. We have concentrated on the tropical regions of Australia and the Coral Triangle. The best known groups are the corals, fish, and commercially important invertebrates. In considering whether this is true, we have concentrated on the diversi…	0	https://doi.org/10.3390/d10010001
572	SDG2: Zero hunger	High site fidelity and low site connectivity in temperate salt marsh fish populations: a stable isotope approach	0	Adult and juvenile fish utilise salt marshes for food and shelter at high tide, moving into adjacent sublittoral regions during low tide. Understanding whether there are high levels of site fidelity for different species of coastal fish has important implications for habitat conservation and the design of marine protected areas. We hypothesised that common salt marsh fish species would demonstrat…		https://doi.org/10.1007/s00442-011-2077-y
573	SDG2: Zero hunger	Sink or swim? Modernization of mussel farming methods may negatively impact established seabird communities	1	Marine aquaculture is the fastest growing sector of global food production and is projected to increase to meet future demand. Expansion and modernization of cultivation methods are needed to reach this target but a cost-benefit evaluation for biodiversity conservation is required to achieve sustainable aquaculture practices. We assess drivers of avian richness and abundance in a long-established…	1	https://doi.org/10.1016/j.biocon.2020.108458
574	SDG2: Zero hunger	Growth and bleaching of the coral Oculina patagonica under different environmental conditions in the western Mediterranean Sea	0	The success that the putative alien species Oculina patagonica is able to survive under different environmental conditions may be benefiting its establishment and spreading along the Mediterranean Basin. Our objectives were to determine the response of this species, in terms of growth and bleaching, under different environmental conditions. Field data on colony growth and bleaching were obtained …		https://doi.org/10.1007/s00227-014-2509-4
575	SDG2: Zero hunger	Local and remote physical processes driving variability of the planktonic system in the Juan Fernandez Archipelago: A multidisciplinary framework providing conservation insights	0	The Juan Fernandez Ridge, a vulnerable marine ecosystem located far off the coast of central Chile and formed by several seamounts, guyots and three islands (Robinson Crusoe, Santa Clara and Alejandro Selkirk), has recently been declared a Coastal Marine Protected Area of Multiple Uses with several National Parks embedded in it. Recent studies have highlighted the influence of remote and local oc…		https://doi.org/10.1002/aqc.3499
576	SDG2: Zero hunger	Meiofaunal diversity and nematode assemblages in two submarine caves of a Mediterranean marine protected area	0	Submarine caves are environments of great ecological interest because of the occurrence of peculiar conditions, such as the attenuation of light and reduced water turnover, which can determine oligotrophic conditions from the entrance to the interior part of the cave. These environmental gradients may influence the distribution of the communities inhabiting submarine caves. In this study we inves…
577	SDG2: Zero hunger	Conservation of marine and coastal biodiversity in Brazil	1	The invertebrate benthos, especially the micro- and mesofaunal components, of the Brazilian seas is still poorly known. Relatively few species have been recorded, reflecting the lack of research in this field. The intertidal zone, to depths of about 20 in, has been studied the most, and there the numbers of endemic species are relatively high. The diversity of demersal and pelagic fishes is simil…	1	https://doi.org/10.1111/j.1523-1739.2005.00692.x
578	SDG2: Zero hunger	Do Mediterranean fish assemblages associated with marine caves and rocky cliffs differ?	0	Fish assemblages associated with marine caves and rocky cliffs were investigated in the Salento Peninsula (SE Italy, Mediterranean Sea) by using visual census methods. Sampling was done at three sites, each of which included 4 habitat types: the external and the internal portions of caves, and shallow and deep rocky cliffs. 10 and 13 species were found exclusively inside cave habitats (e.g. Corcy…		https://doi.org/10.1016/j.ecss.2008.09.023
579	SDG2: Zero hunger	Designing MPAs for food security in open-access fisheries	1	Food security remains a principal challenge in the developing tropics where communities rely heavily on marine-based protein. While some improvements in fisheries management have been made in these regions, a large fraction of coastal fisheries remain unmanaged, mismanaged, or use only crude input controls. These quasi-open-access conditions often lead to severe overfishing, depleted stocks, and …	1	https://doi.org/10.1038/s41598-019-44406-w
580	SDG2: Zero hunger	TROPHIC INFERENCE IN TWO SYMPATRIC SHARKS, SPHYRNA LEWINI AND CARCHARHINUS FALCIFORMIS (ELASMOBRANCHII: CARCHARHINIFORMES), BASED ON STABLE ISOTOPE ANALYSIS AT MALPELO ISLAND, COLOMBIA	0	Background. Elasmobranchs can play important roles in marine communities. But, relatively little is known about their diet, and movement. Sphyrna lewini (Griffith et Smith, 1834) consumes fishes, cephalopods, rays, and crustaceans. Carcharhinus falciformis (Muller et Henle, 1839) feed on fishes, cephalopods, crustaceans and sea turtles. To date, there are no studies available on the trophic ecolo…		https://doi.org/10.3750/AIEP/02177
581	SDG2: Zero hunger	Stable isotopes and trophic positions of littoral fishes from a Mediterranean marine protected area	0	Stable isotope analyses were employed to explore feeding and foraging habitats and trophic levels of littoral fishes in a western Mediterranean Marine Protected Area (Egadi Islands, Sicily, Italy). Carbon and nitrogen stable isotope ratios were measured in primary producers, invertebrates and fishes collected in December 2001 and January 2002. Fishes of the littoral region of the Egadi Islands ha…		https://doi.org/10.1007/s10641-008-9381-3
582	SDG2: Zero hunger	A spatial risk approach towards integrated marine spatial planning: A case study on European hake nursery areas in the North Alboran Sea	0	Europe's Blue Growth strategy promotes the intensification of human activities at sea and increases the environmental risk such as the decline of the provision of key ecosystem services and potential conflicts among human activities. The fishing sector, in the Alboran Sea, is economically and culturally one of the most important and relies on overexploited target species such as European hake (Me…	0	https://doi.org/10.1016/j.marenvres.2018.10.008
583	SDG2: Zero hunger	Tracing trophic pathways through the marine ecosystem of Rapa Nui (Easter Island)	0	The structure of food webs provides important insight into biodiversity, organic matter (OM) pathways, and ecosystem functioning. Stable isotope analysis (delta C-13 and delta N-15) was used to characterize the trophic structure and the main OM pathways supporting food webs in the Rapa Nui coastal marine ecosystem. The trophic position of consumers and isotopic niche metrics were estimated for di…		https://doi.org/10.1002/aqc.3500
584	SDG2: Zero hunger	Quantifying marine mammal hotspots in British Columbia, Canada	0	Global biodiversity is undergoing rapid decline due to direct and indirect anthropogenic impacts to species and ecosystems. Marine species, in particular, are experiencing accelerated population declines leading to many species being considered at risk by regional, national, and international standards. As one conservation approach, decisions made using spatially explicit information on marine wi…	0	https://doi.org/10.1002/ecs2.1884
585	SDG2: Zero hunger	Structure and seasonal variability of fish food webs in an estuarine tropical marine protected area (Senegal): Evidence from stable isotope analysis	0	West African tropical estuaries play an important role in the growth and survival of many commercially exploited fish species and enable the sustainability of considerable artisanal fishery yields. However, their trophic functioning remains poorly understood. In the Sine Saloum estuary (Senegal), a marine protected area (MPAs) was designated in 2003 to manage fisheries resources. The present stud…		https://doi.org/10.1016/j.ecss.2011.02.017
586	SDG2: Zero hunger	Combined bottom-up and top-down pressures drive catastrophic population declines of Arctic skuas in Scotland	0	Understanding drivers of population change is critical for effective species conservation. In the northeast Atlantic Ocean, recent changes amongst seabird communities are linked to human and climate change impacts on food webs. Many species have declined severely, with food shortages, and increased predation reducing productivity. Arctic skua Stercorarius parasiticus, a kleptoparasite of other se…	0	https://doi.org/10.1111/1365-2656.12890
587	SDG2: Zero hunger	Assessing interacting impacts of artisanal and recreational fisheries in a small Marine Protected Area (Portofino, NW Mediterranean Sea)	0	Marine Protected Areas (MPAs) have spread across the Mediterranean to protect its rich biodiversity and manage human activities for a more sustainable coastal development. Within MPAs, traditional artisanal fishing is competing for space and resources with increasing recreational fishing, likely leading to interacting ecological effects. Such effects are difficult to unravel, given the multispeci…	0	https://doi.org/10.1002/ecs2.1601
588	SDG2: Zero hunger	Spatial ecology of long-tailed ducks and white-winged scoters wintering on Nantucket Shoals	0	We examine the long-term co-occurrence of long-tailed ducks (Clangula hyemalis) and white-winged scoters (Melanitta fusca) wintering at the Nantucket Shoals off Massachusetts, USA, and ask: (1) What oceanographic features attract these aggregations? (2) How are distributions of prey and sea ducks related to one another? and (3) What is the explanation for the spatial association between these two…		https://doi.org/10.1002/ecs2.3002
589	SDG2: Zero hunger	The Baltic Health Index (BHI): Assessing the social-ecological status of the Baltic Sea	0	Improving the health of coastal and open sea marine ecosystems represents a substantial challenge for sustainable marine resource management, since it requires balancing human benefits and impacts on the ocean. This challenge is often exacerbated by incomplete knowledge and lack of tools that measure ocean and coastal ecosystem health in a way that allows consistent monitoring of progress towards…	0	https://doi.org/10.1002/pan3.10178
590	SDG2: Zero hunger	Use of monitoring data to support conservation management and policy decisions in Micronesia	0	Adaptive management implies a continuous knowledge-based decision-making process in conservation. Yet, the coupling of scientific monitoring and management frameworks remains rare in practice because formal and informal communication pathways are lacking. We examined 4 cases in Micronesia where conservation practitioners are using new knowledge in the form of monitoring data to advance marine con…	0	https://doi.org/10.1111/cobi.12542
591	SDG2: Zero hunger	Marine litter pollution associated with hydrothermal sites in the Aeolian archipelago (western Mediterranean Sea)	0	nThe Aeolian Archipelago, in the western Mediterranean Sea, is an active volcanic arc hosting several hydrothermal sites. This area, considered a Vulnerable Marine Ecosystem by The Food and Agriculture Organization because of its ecological importance and biodiversity value, is affected by various pressures and threats that may act as sources of marine litter. The aim of this paper was to analyse…		https://doi.org/10.1016/j.scitotenv.2020.144968
592	SDG2: Zero hunger	A multi-agent ecosystem model for studying changes in a tropical estuarine fish assemblage within a marine protected area	0	As marine protected areas (MPAs) are increasingly being utilised as a tool for fishery management, their impact on the food web needs to be fully understood. However, little is known about the effect of MPAs on fish assemblages, especially in the presence of different life history and ecological traits. Modelling the observed changes in fish population structures may provide a mechanistic underst…		https://doi.org/10.1051/alr/2012028
593	SDG2: Zero hunger	Marine Mammals in the Crimean Conservation Areas	0	Crimean marine protected areas (MPAs) (32) have different conservation levels: Natural Reserves (Sary Bulat Islands, Karadag, Martyan Cape, Kazantip, and Opuk), National Natural Park in Tarkhankut Peninsula (Beautiful Harbour), nature sanctuaries (Aya and Fiolent Capes, Cossack, or Kazak, Bay, Bakal Spit, etc.), fragmentary small coastal aqueous complexes (Ay Todor and Placa Capes, some rocky coa…
594	SDG2: Zero hunger	Using the Ocean Health Index to Identify Opportunities and Challenges to Improving Southern Ocean Ecosystem Health	0	The Antarctic coast and seas are considered some of the most pristine marine systems on Earth. Their comprehensive assessment is critical because meeting ambitious conservation objectives while maintaining sustainable human uses will be increasingly challenging with growing climate change impacts, recovery from past overharvesting, and potential revision of activities permitted with future revisi…	0	https://doi.org/10.3389/fmars.2017.00020
595	SDG2: Zero hunger	Current knowledge on harbour porpoises (Phocoena phocoena) in the Baltic Sea	0	Concern has been raised about the long-term viability of the harbour porpoise population in the Baltic Sea. By-catch at possibly unsustainable levels, contaminants, overfishing of prey species and disturbance have been identified as possible threats. This literature study summarises the current knowledge about harbour porpoises in the Baltic Sea and, on the basis of reviewed material, tries to id…	0
596	SDG2: Zero hunger	Distribution and factors influencing on structure of reef fish communities in Nha Trang Bay Marine Protected Area, South-Central Vietnam	0	Visual censuses of coral reef fishes in Nha Trang Bay Marine Protected Area (MPA) were conducted during September-October 2005. Nha Trang Bay MPA is relatively rich in reef fishes compared to other areas in Vietnam and the Pacific Ocean outside the 'Coral Triangle,' consistent with its biogeographic location in the western South China Sea. A total of 266 species of 40 families of coral reef fishe…		https://doi.org/10.1007/s10641-007-9293-7
597	SDG2: Zero hunger	Trophic cascades in benthic marine ecosystems: lessons for fisheries and protected-area management	0	An important principle of environmental science is that changes in single components of systems are likely to have consequences elsewhere in the same systems. In the sea, food web data are one of the few foundations for predicting such indirect effects, whether of fishery exploitation or following recovery in marine protected areas (MPAs). We review the available literature on one type of indirec…	0	https://doi.org/10.1017/S0376892900000205
598	SDG2: Zero hunger	Concepts and approaches for marine ecosystem research with reference to the tropics	0	The present article gives an overview on the leading concepts and modelling approaches for marine ecosystems' research including (1) The trophodynamic theory of pelagic ecosystems, (2) Compartment/network models, (3) Mesocosm experiments and (4) Individual based modelling approaches and virtual ecosystems (VE). The main research questions addressed, as well as the potential and limits of each app…	0
599	SDG2: Zero hunger	Local Community Knowledge and Participation for Animal Diversity Conservation in SSWP IV Sidoarjo, East Java, Indonesia	0	Key to animal biodiversity conservation are the local communities that live in and around these sites as their livelihoods depend on the natural resources these sites provide. SSWP (Sub Satuan Wilayah Pembangunan) IV Sidoarjo covers Krian, Balongbendo, Tarik, Prambon, and Wonoayu subdistrict with the main function as technical agricultural, industrial zones supported by the low density of settlem…	0	https://doi.org/10.1063/1.4985395
600	SDG2: Zero hunger	Latin American benthic shellfisheries: emphasis on co-management and experimental practices	1	In Latin America the small-scale fishery of marine benthic invertebrates is based on high-value species. It represents a source of food and employment and generates important incomes to fishers and, in some cases, export earnings for the countries. In the review, we define 2 key concepts: small-scale fishery and co-management. We address the temporal extractive phases which Latin American shellfi…	1	https://doi.org/10.1023/A:1014235924952
601	SDG2: Zero hunger	Reef fish biomass recovery within community-managed no take zones	0	Locally managed marine areas (LMMAs) are increasingly recognised as a key strategy for small-scale fisheries management across the Indo-Pacific. When effective, LMMAs can encourage responsible fishing, strengthen compliance and improve adaptive capacity, and may help to safeguard food security, address coastal poverty and increase resource sustainability. However, evidence that LMMAs can achieve …	0	https://doi.org/10.1016/j.ocecoaman.2020.105210
602	SDG2: Zero hunger	Global mismatch between fishing dependency and larval supply from marine reserves	1	Marine reserves are viewed as flagship tools to protect exploited species and to contribute to the effective management of coastal fisheries. Yet, the extent to which marine reserves are globally interconnected and able to effectively seed areas, where fisheries are most critical for food and livelihood security is largely unknown. Using a hydrodynamic model of larval dispersal, we predict that m…	1	https://doi.org/10.1038/ncomms16039
603	SDG2: Zero hunger	Industrial fishing, no-take zones and endangered penguins	0	Industrial fishing can profoundly alter marine environments, and no-take zones are an important tool to achieve sustainable fishing and re-establish ecosystem integrity. However, the potential benefits for vagile species such as top predators are still questioned. The numbers of endangered African penguins Spheniscus demersus have halved since 2004. They depend on small pelagic fish, also targete…	0	https://doi.org/10.1016/j.biocon.2011.12.013
604	SDG2: Zero hunger	Fish, human health and marine ecosystem health: policies in collision	1	Background Health recommendations advocating increased fish consumption need to be placed in the context of the potential collapse of global marine capture fisheries. Methods Literature overview. Results In economically developed countries, official healthy eating advice is to eat more fish, particularly that rich in omega-3 oils. In many less economically developed countries, fish is a key human…	1	https://doi.org/10.1093/ije/dyn157
605	SDG2: Zero hunger	Integrating diet and movement data to identify hot spots of predation risk and areas of conservation concern for endangered species	0	Effective management of threatened and endangered species requires an understanding of how species of conservation concern are distributed spatially, as well as the spatial distribution of risks to the population, such as predation or human impacts (fishing, pollution, and loss of habitat). Identifying high-risk areas is particularly important when designing reserves or protected areas. Our novel…	0	https://doi.org/10.1111/j.1755-263X.2011.00210.x
606	SDG2: Zero hunger	Marine ornamental species from European waters: a valuable overlooked resource or a future threat for the conservation of marine ecosystems?	0	The worldwide growth of the marine aquarium market has contributed to the degradation of coral reef ecosystems. Enforcing the legislation on importing ornamental species has led some European traders to concentrate on local species. Portugal is used as a case study of marine ornamental fish and invertebrate collection in European waters. One hundred and seventy two species occurring in Portuguese…	0	https://doi.org/10.3989/scimar.2006.70n3389
607	SDG2: Zero hunger	The Humboldt Current System of northern and central Chile	0	The Humboldt Current System (HCS) is one of the most productive marine ecosystems on earth. It extends along the west coast of South America from southern Chile (similar to 42 degrees S) up to Ecuador and the Galapagos Islands near the equator. The general oceanography of the HCS is characterised by a predominant northward flow of surface waters of subantarctic origin and by strong upwelling of c…	0
608	SDG2: Zero hunger	Human Health and Ocean Pollution	1	Background: Pollution - unwanted waste released to air, water, and land by human activity - is the largest environmental cause of disease in the world today. It is responsible for an estimated nine million premature deaths per year, enormous economic losses, erosion of human capital, and degradation of ecosystems. Ocean pollution is an important, but insufficiently recognized and inadequately con…	1	https://doi.org/10.5334/aogh.2831		Suggests MPAs are a solution to many of the issues, does not explicitly evaluate MPAs
609	SDG2: Zero hunger	Single-Species Co-management Improves Fish Assemblage Structure and Composition in a Tropical River	1	Co-management is increasingly recognized as an effective model for managing fisheries, but little information exists on whether co-management can produce effects in species other than the target species. Fishery co-management in the tropics, where fish diversity is high and fish catches tend to be multispecies, is prone to produce assemblage-wide effects via alterations in the food web and change…	1	https://doi.org/10.3389/fevo.2021.604170
610	SDG2: Zero hunger	Consistent multi-level trophic effects of marine reserve protection across northern New Zealand	0	Through systematic Reef Life Survey censuses of rocky reef fishes, invertebrates and macroalgae at eight marine reserves across northern New Zealand and the Kermadec Islands, we investigated whether a system of no-take marine reserves generates consistent biodiversity outcomes. Ecological responses of reef assemblages to protection from fishing, including potential trophic cascades, were assessed…		https://doi.org/10.1371/journal.pone.0177216
611	SDG2: Zero hunger	Artisanal fisheries on Kenya's coral reefs: Decadal trends reveal management needs	1	Kenya's small scale coral reef fisheries are extensively studied yet a practical understanding of the resilience and status of the main target species remains largely elusive to the manager. We combined a range of fishery and fish population descriptors to analyse Kenya's coral reef fish and fisheries over a 20 year period from the 1980s, to determine the sustainability of current fishing levels …	1	https://doi.org/10.1016/j.fishres.2016.07.025
612	SDG2: Zero hunger	Effects of fisheries zoning and environmental characteristics on population parameters of the tambaqui (Colossoma macropomum) in managed floodplain lakes in the Central Amazon	1	Fisheries zoning and the influence of biotic and abiotic factors in the spatial distribution of Colossoma macropomum (Cuvier) in the Piagacu-Purus Sustainable Development Reserve, Central Amazon, during 2012-2013 were evaluated. The relative abundance and population parameters of the C.macropomum were compared between conservation (no-take zone) and fishing (open to fishing zone) lakes. The fish …	1	https://doi.org/10.1111/fme.12164
613	SDG2: Zero hunger	Stable isotope mixing models elucidate sex and size effects on the diet of a generalist marine predator	0	We applied a 2-step clustering algorithm and Bayesian stable isotope mixing model to examine intraspecific differences in the contribution of prey sources to the diet and foraging habitat of harbor seals Phoca vitulina in the Salish Sea, USA. We analyzed stable isotopes of carbon and nitrogen collected from 32 seals and 248 prey samples representing 18 of 25 of the most common seal prey items ide…		https://doi.org/10.3354/meps11230
614	SDG2: Zero hunger	Small Scale Fisheries Management: Lessons from Cockle Harvesters in Nicaragua and Tanzania	0	The role of women in gleaning fisheries tends to be underestimated and poorly documented although they play an important role in coastal food security and income generation. This article describes two initiatives for co-management of women dominated cockle (Anadara spp.) fisheries implemented in Zanzibar Island of Tanzania and in Nicaragua that were based on a Fiji model. In each case, significan…	0	https://doi.org/10.1080/08920753.2010.483174
615	SDG2: Zero hunger	Marine reserve networks conserve biodiversity by stabilizing communities and maintaining food web structure	0	Theory predicts that networks of fully protected marine reserves conserve biodiversity by stabilizing communities and maintaining food web structure in the face of inadequately constrained fishery exploitation. To test these ideas we examine trends in species incidence, community and trophic structure of temperate reef fishes over an eight year period within the Fiordland no-take marine reserve n…		https://doi.org/10.1890/ES13-00257.1
616	SDG2: Zero hunger	Assessing the Effect of Marine Reserves on Household Food Security in Kenyan Coral Reef Fishing Communities	1	Measuring the success or failure of natural resource management is a key challenge to evaluate the impact of conservation for ecological, economic and social outcomes. Marine reserves are a popular tool for managing coastal ecosystems and resources yet surprisingly few studies have quantified the social-economic impacts of marine reserves on food security despite the critical importance of this o…	1	https://doi.org/10.1371/journal.pone.0113614
617	SDG2: Zero hunger	Market and design solutions to the short-term economic impacts of marine reserves	1	Well-managed fisheries support healthy ocean ecosystems, coastal livelihoods and food security for millions of people. However, many communities lack the resources to implement effective fisheries management. No-take marine reserves are a ubiquitous management intervention that provide conservation benefits and under certain circumstances can provide long-term fishery benefits as a result of larv…		https://doi.org/10.1111/faf.12153
618	SDG2: Zero hunger	From marine deserts to algal beds: Treptacantha elegans revegetation to reverse stable degraded ecosystems inside and outside a No-Take marine reserve	0	Canopy-forming algae play a key role in temperate coastal ecosystems sustaining complex habitats that provide food and refuge for rich associated biotic communities. These macroalgae are in decline in many coastal areas, where overgrazing by herbivores can lead to the loss of these highly structured and diverse habitats toward less complex sea urchin barren grounds. Once established, low producti…		https://doi.org/10.1111/rec.13123
619	SDG2: Zero hunger	A novel experimental approach to investigate the potential for behavioural change in sharks in the context of depredation	0	Baited video systems have been widely used to assess the relative abundance and diversity of sharks in locations around the world, however they provide limited information on behaviour. We developed and pilot tested a novel experimental approach to investigate whether repeated deployments of baited video systems in the same location could generate quantitative data on shark behavioural patterns, …		https://doi.org/10.1016/j.jembe.2020.151440
620	SDG2: Zero hunger	Shifts in attack behavior of an important kelp forest predator within marine reserves	0	Marine reserves have become increasingly valuable tools with which to manage ecosystems. These reserves consistently restore populations of top predators, often reducing availability of their favored prey. We hypothesized that such prey reduction in reserves causes protected predators to alter their attack behavior to include less palatable prey, potentially amplifying top-down effects on communi…	0	https://doi.org/10.3354/meps11157
621	SDG2: Zero hunger	Long-term changes in population density of Fissurella picta and Fissurella limbata (Gastropoda) in the marine reserve of Mehuin, Chile	0	At the Marine Reserve in Mehuin, changes in density and distribution of key-hole limpets were detected during the first five years as consequence of human gatherers exclusion. However, later demographic changes could be explained by within-community ecological processes, not detected in presence of human gatherers. Competition for food, predation and recruitment, were explanatory hypothesis for s…
622	SDG2: Zero hunger	Concentrations and stable isotopes of mercury in sharks of the Galapagos Marine Reserve: Human health concerns and feeding patterns	0	The human ingestion of mercury (Hg) from sea food is of big concern worldwide due to adverse health effects, and more specifically if shark consumption constitutes a regular part of the human diet. In this study, the total mercury (THg) concentration in muscle tissue were determined in six sympatric shark species found in a fishing vessel seized in the Galapagos Marine Reserve in 2017. The THg co…		https://doi.org/10.1016/j.ecoenv.2021.112122
623	SDG2: Zero hunger	Fiordland: the ecological basis for ecosystem management	0	Marine ecosystems are structured by physical and biological influences on: production and transport of organic matter; population dynamics; and food web architecture. Here, we review how scientific insights in the Fiordland marine area have supported ecosystem management. Fiordland is a case study for four ecological paradigms: 1. physical forcing of productivity; 2. subsidies of organic matter; …	0	https://doi.org/10.1080/00288330.2014.897636
624	SDG2: Zero hunger	Trophic preferences of three pelagic fish inhabiting the Galapagos Marine Reserve: ecological inferences using multiple analyses	0	There is a great need to understand how resource interactions alter the functioning of ecosystems, where the selective elimination of pelagic fishes can lead to changes in food web structure. This work analyzes the trophic niches of three species of commercial importance in the Galapagos Marine Reserve, yellowfin tuna, Thunnus albacares (TA), skipjack tuna, Katsuwonus pelamis (KP), and wahoo, Aca…		https://doi.org/10.1007/s10641-020-00967-8
625	SDG2: Zero hunger	Spatial conservation of large mobile elasmobranchs requires an understanding of spatio-temporal seascape utilization	0	The positioning of habitats interacts with variability in abiotic factors (e.g. seasonal changes in temperature and extreme weather events) to change how animals use a land or seascape. Marine reserves can regulate how human activities alter fish communities and increase the abundance of targeted species, but the combined influence of reserves and seascape context on species habitat use remains u…		https://doi.org/10.1093/icesjms/fsx192
626	SDG2: Zero hunger	Recovery of Durvillaea antarctica (Durvilleales) inside and outside Las Cruces marine reserve, Chile	0	We present the results for over two decades of monitoring on intertidal food-gatherers and the population of the low rocky shore dweller kelp Durvillaea antarctica, a short-distance disperser, inside and outside the no-take marine reserve, Estacion Costera de Investigaciones Marinas (ECIM), at Las Cruces, central Chile. It was hypothesized that protection of an initially extremely depleted popula…		https://doi.org/10.1890/06-1285.1
627	SDG2: Zero hunger	Prey base shifts in red rock lobster Jasus edwardsii in response to habitat conversion in Fiordland marine reserves: implications for effective spatial management	0	Persistence of subpopulations dispersed among spatial management units, such as marine reserves, relies heavily upon the quality of local habitat, as well as size and connectivity of habitat patches. We examined the relative abundance of the red rock lobster Jasus edwardsii and its primary bivalve food resources within 3 marine reserves in the Doubtful-Bradshaw Sound complex in Fiordland, New Zea…		https://doi.org/10.3354/meps07971
628	SDG2: Zero hunger	Evaluating the Fit of Co-management for Small-Scale Fisheries Governance in Timor-Leste	1	Fisheries co-management is an increasingly globalized concept, and a cornerstone of the Voluntary Guidelines for Securing Sustainable Small-scale Fisheries in the Context of Food Security and Poverty Eradication, adopted by the United Nations Food and Agriculture Organization member states in 2014. Timor-Leste is a politically young country in the relatively rare position of having underexploited…	1	https://doi.org/10.3389/fmars.2019.00392
629	SDG2: Zero hunger	Survival and behaviour of juvenile red rock lobster, Jasus edwardsii, on rocky reefs with varying predation pressure and habitat complexity	0	The role of large predatory fish in coastal communities is generally unknown because of overfishing. In order to understand the direct and indirect impacts of these increased population sizes on coastal food chains, the effect of areas with more fish predators on the survival and behaviour of potential prey was assessed. Juvenile lobsters, Jasus edwardsii (10-20 mm carapace length), were tethered…		https://doi.org/10.1071/MF07116
630	SDG2: Zero hunger	Solutions for Recovering and Sustaining the Bounty of the Ocean Combining Fishery Reforms, Rights-Based Fisheries Management, and Marine Reserves	1	Food security, economic opportunities, and other benefits provided by a healthy ocean are in jeopardy because of years of overexploitation of many fisheries, and the challenges will intensify in many locales as climate and the environment continue to change. The good news is that solutions are gaining traction. Mandates to end overfishing that use scientifically determined catch limits and rights…	1	https://doi.org/10.5670/oceanog.2015.51
631	SDG2: Zero hunger	Ecosystem effects of fishing in kelp forest communities	0	Kelp forests, highly diverse cold water communities organized around the primary productivity and physical structure provided by members of the Laminariales, support a variety of fisheries, and the kelp itself is harvested for alginates. Worldwide, these communities generally share susceptibility to destructive overgrazing by sea urchins. The impact of sea-urchin grazing is governed by the ratio …	0	https://doi.org/10.1006/jmsc.2000.0715
632	SDG2: Zero hunger	Marine reserves, fisheries ban, and 20 years of positive change in a coral reef ecosystem	0	By 2004, Belize was exhibiting classic fishing down of the food web. Groupers (Serranidae) and snappers (Lutjanidae) were scarce and fisheries turned to parrotfishes (Scarinae), leading to a 41% decline in their biomass. Several policies were enacted in 2009-2010, including a moratorium on fishing parrotfish and a new marine park with no-take areas. Using a 20-year time series on reef fish and be…	0	https://doi.org/10.1111/cobi.13738
633	SDG2: Zero hunger	Trophic mass balanced models and dynamic simulations of benthic communities from La Rinconada Marine Reserve off northern Chile: network properties and multispecies harvest scenario assessments	0	1. Mass balanced trophic models and dynamic simulations of two benthic ecological systems from La Rinconada Marine Reserve (Antofagasta Bay, SE Pacific) were constructed. 2. The scallop Argopecten purpuratus is the most important benthic resource in La Rinconada Marine Reserve, followed by the carnivorous snail Thais chocolata, and the filter-feeder bivalves Tagelus dombeii and Transennella panno…	0	https://doi.org/10.1002/aqc.1047
634	SDG2: Zero hunger	RESOURCES AND DISPERSAL AS FACTORS LIMITING A POPULATION OF THE TUSSOCK MOTH (ORGYIA-VETUSTA), A FLIGHTLESS DEFOLIATOR	0	The western tussock moth (Orgyia vetusta) is very abundant on one stand of bush lupine (Lupinus ar-boreus) at the Bodega Marine Reserve (Sonoma Co., Calif., USA), but is sparse or absent on nearby stands. To determine what controls its abundance, both within the outbreak area and more globally, I performed experimental manipulations of resource availability and dispersal. To measure resource limi…		https://doi.org/10.1007/BF00317080
635	SDG2: Zero hunger	Leigh Marine Laboratory contributions to marine conservation	0	The Leigh Marine Laboratory (LML) has taken full advantage of its location on the shores of one of the world's first no-take marine reserves. The foresight of the founders of the laboratory has enabled the pursuit of ecological studies that have been amongst the first to demonstrate the effectiveness of reserves as a tool for conservation and restoration. The insights flowing from this work at Le…		https://doi.org/10.1080/00288330.2013.810160
636	SDG2: Zero hunger	Biodiversity, ecology, fisheries, and use and trade of Tetraodontiformes fishes reveal their socio-ecological significance along the tropical Brazilian continental shelf	1	Tetraodontiformes fishes play a critical role in benthic and demersal communities and are facing threats due to anthropogenic impacts and climate change. However, they are poorly studied worldwide. To improve knowledge on the socio-ecological significance and conservation of Tetraodontiformes a review of literature addressing the diversity, ecology, use and trade, conservation, and main threats o…	1	https://doi.org/10.1002/aqc.3278
637	SDG2: Zero hunger	Effects of Spearfishing on Reef Fish Populations in a Multi-Use Conservation Area	1	Although spearfishing is a popular method of capturing fish, its ecological effects on fish populations are poorly understood, which makes it difficult to assess the legitimacy and desirability of spearfishing in multi-use marine reserves. Recent management changes within the Great Barrier Reef Marine Park (GBRMP) fortuitously created a unique scenario by which to quantify the effects of spearfis…	1	https://doi.org/10.1371/journal.pone.0051938
638	SDG2: Zero hunger	Virus-like particles associated with dieback symptoms in the brown alga Ecklonia radiata	0	Since 1991 epidemic dieback of the kelp Ecklonia radiata has been observed at the Leigh Marine Reserve and other sites in northern New Zealand. As the dominant phaeophycean E. radiata is a very important component of the eastern coastal ecosystem, providing both food and refuge for many species. Examination of the E. radiata sap extracts by electron microscopy detected the presence of both straig…		https://doi.org/10.3354/dao030217
639	SDG2: Zero hunger	Harbor seal diet in northern Puget Sound: implications for the recovery of depressed fish stocks	0	Recovery of severely declining resource stocks often leads to enforced quotas or reduced human access to those resources. Predators, however, do not recognize such restrictions and may be attracted to areas of increased prey abundances where human extraction is being limited. Such targeting by predators may reduce or retard the potential recovery of depressed stocks. In the San Juan Islands, nort…		https://doi.org/10.3354/meps09880
640	SDG2: Zero hunger	Towards sustainability in world fisheries	1	Fisheries have rarely been 'sustainable'. Rather, fishing has induced serial depletions, long masked by improved technology, geographic expansion and exploitation of previously spurned species lower in the food web. With global catches declining since the late 1980s, continuation of present trends will lead to supply shortfall, for which aquaculture cannot be expected to compensate, and may well …	1	https://doi.org/10.1038/nature01017
641	SDG2: Zero hunger	CONTEXT-DEPENDENT EFFECTS OF FISHING: VARIATION IN TROPHIC CASCADES ACROSS ENVIRONMENTAL GRADIENTS	0	Marine reserves provide a large-scale experimental framework to investigate the effects of fishing on food web dynamics and how they vary with environmental context. Because marine reserves promote the recovery of previously. shed predators, spatial comparisons between reserve and. shed sites are often made to infer such effects; however, alternative explanations for differences between reserve a…	0	https://doi.org/10.1890/07-1776.1
642	SDG2: Zero hunger	THE MUSSEL CACHING BEHAVIOR OF HOODED CROWS CORVUS-CORONE-CORNIX	0	The food caching behaviour of Hooded Crows Corvus corone cornix was studied at Lough Hyne Marine Reserve, Ireland. All prey items cached were obtained from the intertidal zone and Mussels Mytilus edulis were the most frequently recovered prey species. The methods used to cache intertidal prey species were similar to that previously described for other species in the genus Corvus. Mussels were cac…		https://doi.org/10.1080/00063659209477107
643	SDG2: Zero hunger	Decadal-scale response of detritivorous surgeonfishes (family Acanthuridae) to no-take marine reserve protection and changes in benthic habitat	0	No-take marine reserves (NTMR) are increasingly being implemented to mitigate the effects of fishing on coral reefs, yet determining the efficacy of NTMRs depends largely on partitioning the effects of fishing from the effect of benthic habitat. Species of coral-reef fishes typically decline in density when subjected to fishing or benthic disturbances, but this is not always the case. This study …		https://doi.org/10.1111/jfb.13809
644	SDG2: Zero hunger	The intrinsic vulnerability to fishing of coral reef fishes and their differential recovery in fishery closures	1	Coral reef fishes differ in their intrinsic vulnerability to fishing and rates of population recovery after cessation of fishing. We reviewed life history-based predictions about the vulnerability of different groups of coral reef fish and examined the empirical evidence for different rates of population recovery inside no-take marine reserves to (1) determine if the empirical data agree with pre…	1	https://doi.org/10.1007/s11160-014-9362-x
645	SDG2: Zero hunger	Optimal spatial management in a multiuse marine habitat: Balancing fisheries and tourism	1	Marine fisheries are an important source of food supply and play an important economic role in many regions worldwide. However, due to aggressive fishing practices they are increasingly overexploited. Marine reserves have the potential to alleviate this problem and moreover, they also provide a physical area where an alternative economic activity can exist without being in conflict with fishing g…	1	https://doi.org/10.1111/nrm.12309
646	SDG2: Zero hunger	Community patterns generated by human harvesting on Chilean shores: A review	1	1. The Chilean rocky coast has been exploited for food by coastal gatherers for at least 8500 years BP and probably was an important factor in how prehistoric people were able to colonize the South Americas Pacific Rim. The main species targeted in the past were the same as those today except that now the gatherers are resident and the fishing activity is more intense and persistent. 2. With many…	1	https://doi.org/10.1002/aqc.430
647	SDG2: Zero hunger	Hand feeding can periodically fuel a major portion of bull shark energy requirements at a provisioning site in Fiji	0	Wildlife tourism is often extolled for its contribution to conservation. However, understanding the effects of tourism activities on the health of target animals is required to fully assess conservation benefits. Shark tourism operators often use food rewards to attract sharks in close proximity to tourists, but nothing is known about the contribution of these food rewards to the energetic requir…		https://doi.org/10.1111/acv.12370
648	SDG2: Zero hunger	Temperate predators and seasonal water temperatures impact feeding of a range expanding tropical fish	0	Range expansions of species due to climate change threaten the function and composition of marine ecosystems globally, yet factors constraining or facilitating this redistribution are poorly understood. Native predators may constrain prey shifting poleward through consumption, or by restricting their feeding activity. However, the extent that native predators impact range-expanders will likely be…	0	https://doi.org/10.1007/s00227-016-2844-8
649	SDG2: Zero hunger	Persistence of depleted abalones in marine reserves of central California	0	We evaluated the persistence and possible recovery of two depleted marine mollusks, the red (Haliotis rufescens) and black abalone (H. cracherodii), in central California, USA. Monitoring over 32-years did not reveal increasing or decreasing trends in red abalone abundances and sizes over the past three decades, in the absence of harvesting. Comparisons between marine reserves protected for at le…	0	https://doi.org/10.1016/j.biocon.2008.01.014
650	SDG2: Zero hunger	Latitude and protection affect decadal trends in reef trophic structure over a continental scale	0	The relative roles of top-down (consumer-driven) and bottom-up (resource-driven) forcing in exploited marine ecosystems have been much debated. Examples from a variety of marine systems of exploitation-induced, top-down trophic forcing have led to a general view that human-induced predator perturbations can disrupt entire marine food webs, yet other studies that have found no such evidence provid…		https://doi.org/10.1002/ece3.6347
651	SDG2: Zero hunger	Mapping habitats in a marine reserve showed how a 30-year trophic cascade altered ecosystem structure	0	Time-series studies have reported trophic cascades in land, freshwater and marine environments in many geographic areas. However, the spatial extent of habitats, a key metric of ecosystem structure, has not been mapped in these studies. Marine reserves can provide experimental, before-after and inside-outside (control-impacted), situations for assessing the impact of fishing on ecosystems. We map…	0	https://doi.org/10.1016/j.biocon.2012.05.009
652	SDG2: Zero hunger	Linking marine biodiversity conservation and poverty alleviation: A case study in selected rural communities of Sagay Marine Reserve, Negros Occidental	1	Marine biodiversity has long been known to provide benefits to the community. However, whether biodiversity conservation has contributed to poverty alleviation remained unclear. This paper investigated the relationship between conservation and poverty alleviation in Sagay Marine Reserve. It specifically looked at the perceived poverty alleviation of poor coastal communities in Brgy. Bulanon. The …	1	https://doi.org/10.1016/j.marpol.2019.02.015
653	SDG2: Zero hunger	Estimates of Particulate Organic Carbon Flowing from the Pelagic Environment to the Benthos through Sponge Assemblages	0	Despite the importance of trophic interactions between organisms, and the relationship between primary production and benthic diversity, there have been few studies that have quantified the carbon flow from pelagic to benthic environments as a result of the assemblage level activity of suspension-feeding organisms. In this study, we examine the feeding activity of seven common sponge species from…		https://doi.org/10.1371/journal.pone.0029569
654	SDG2: Zero hunger	Ecotourism, climate change and reef fish consumption in Palau: Benefits, trade-offs and adaptation strategies	1	Marine ecosystems play a central role in economic and social life in the Republic of Palau, a Small Island Developing State in the Western Pacific. Marine resources underpin subsistence and commercial fisheries, as well as tourism activities, contributing substantially to Palau's GDP and employment. Since 1992, Palau has been actively developing conservation initiatives to protect marine resource…	1	https://doi.org/10.1016/j.marpol.2017.07.022
[truncated: 11,708 more rows]
