# Supplementary material for: Area Based Conservation Tools Have Mixed Effects Across All SDGs but Research May Overstate Effects
Source: Research Square preprint supplement (doi:10.21203/rs.3.rs-6556547/v1), 2025-05-26
Supplement: Supplementary file 3 [file 9cd3874b3141db9f46111e51.xlsx]

## Sheet: Evidence for paper 1
Goal	Goal title	Target type	Target #	Target description	Could MPAs influence the target?	Refs	#	Paper quotes	Comments	JB COMMENT	HP Further comments
1	No Poverty	Outcome	1.01	By 2030, eradicate extreme poverty for all people everywhere, currently measured as people living on less than $1.25 a day	1	Gurney, G.G., Cinner, J., Ban, N.C., Pressey, R.L., Pollnac, R., Campbell, S.J., Tasidjawa, S. and Setiawan, F., 2014. Poverty and protected areas: an evaluation of a marine integrated conservation and development project in Indonesia. Global Environmental Change, 26, pp.98-107. Raycraft, J., 2019. Conserving poverty: Destructive fishing gear use in a Tanzanian marine protected area. Conservation…	5	Poverty alleviation tended to accrue most during the implementation stage, after which MPA activities ceased and poverty reductions did not continue to accrue While the protected area purports to prioritise poverty alleviation, its interventions do not adequately benefit ordinary villagers. Its fishing gear regulations may actually deepen pre-existing structural inequalities and further impoveris…
1	No Poverty	Outcome	1.02	By 2030, reduce at least by half the proportion of men, women and children of all ages living in poverty in all its dimensions according to national definitions	1	Gurney, G.G., Cinner, J., Ban, N.C., Pressey, R.L., Pollnac, R., Campbell, S.J., Tasidjawa, S. and Setiawan, F., 2014. Poverty and protected areas: an evaluation of a marine integrated conservation and development project in Indonesia. Global Environmental Change, 26, pp.98-107. Chircop, A., Francis, J., van der Elst, R., Pacule, H., Guerreiro, J., Grilo, C., Carneiro, G., 2009. Governance of Mar…	5	Gurney et al: Poverty alleviation tended to accrue most during the implementation stage, after which MPA activities ceased and poverty reductions did not continue to accrue Chircop et al: Other important factors for regional MPA cooperation include policy directions on shared concerns such as conservation and development values with emphasis on equitable resource use and poverty alleviation Ward …
1	No Poverty	Outcome	1.03	Implement nationally appropriate social protection systems and measures for all, including floors, and by 2030 achieve substantial coverage of the poor and the vulnerable	0
1	No Poverty	Outcome	1.04	By 2030, ensure that all men and women, in particular the poor and the vulnerable, have equal rights to economic resources, as well as access to basic services, ownership and control over land and other forms of property, inheritance, natural resources, appropriate new technology and financial services, including microfinance	1	De Santo, E.M., Jones, P.J. and Miller, A.M.M., 2011. Fortress conservation at sea: a commentary on the Chagos marine protected area. Marine Policy, 35(2), pp.258-260. Richmond, L. and Kotowicz, D., 2015. Equity and access in marine protected areas: The history and future of ‘traditional indigenous fishing’in the Marianas Trench Marine National Monument. Applied Geography, 59, pp.117-124. Kleiber…	5	An over-zealous focus on ensuring the effectiveness of the Chagos MPA and the neglect of providing for equity and human rights could signal that fortress conservation is alive and well at sea, rather than having been relegated to colonial history Regulation of fishing in the new MPA has the potential to directly and indirectly restrict local access to these culturally important waters. There is c…
1	No Poverty	Outcome	1.05	By 2030, build the resilience of the poor and those in vulnerable situations and reduce their exposure and vulnerability to climate-related extreme events and other economic, social and environmental shocks and disasters	1	Micheli, F., Saenz-Arroyo, A., Greenley, A., Vazquez, L., Montes, J.A.E., Rossetto, M. and De Leo, G.A., 2012. Evidence that marine reserves enhance resilience to climatic impacts. PloS one, 7(7), p.e40832. Bates, A.E., Cooke, R.S., Duncan, M.I., Edgar, G.J., Bruno, J.F., Benedetti-Cecchi, L., Côté, I.M., Lefcheck, J.S., Costello, M.J., Barrett, N. and Bird, T.J., 2019. Climate resilience in mari…	5	Under future scenarios of frequent and/or persistent disturbance [43], increasing resilience to climatic impacts through networks of marine reserves may be the most effective tool that local communities and nations worldwide have to combat the negative impacts of global climate change on marine ecosystems and livelihoods resilience responses in real world communities are also complicated by the l…
1	No Poverty	Means of Implementation	1.A	Ensure significant mobilization of resources from a variety of sources, including through enhanced development cooperation, in order to provide adequate and predictable means for developing countries, in particular least developed countries, to implement programmes and policies to end poverty in all its dimensions	0
1	No Poverty	Means of Implementation	1.B	Create sound policy frameworks at the national, regional and international levels, based on pro-poor and gender-sensitive development strategies, to support accelerated investment in poverty eradication actions	0
2	Zero hunger	Outcome	2.01	By 2030, end hunger and ensure access by all people, in particular the poor and people in vulnerable situations, including infants, to safe, nutritious and sufficient food all year round.	1	Alva, S., Johnson, K., Jacob, A., D’Agnes, H., Mantovani, R. and Evans, T., 2016. Marine protected areas and children’s dietary diversity in the Philippines. Population and environment, 37(3), pp.341-361. Gill, D.A., Cheng, S.H., Glew, L., Aigner, E., Bennett, N.J. and Mascia, M.B., 2019. Social synergies, tradeoffs, and equity in marine conservation impacts. Annual Review of Environment and Reso…	6	Alva study: results suggest a positive association of proximity to MPAs with certain aspects of childrens diets.CAN INCREASE DIETARY DIVERSITY. MPAs prevent resources from becoming degraded and provide economic gains that can help families provide additional resources to their children Loss of access to fishing grounds (resource use rights) and gear confiscations (material wealth) reduced fishing…	Anabieza paper a bonus extra because it does seem so very good!	Agreed!
2	Zero hunger	Outcome	2.02	By 2030, end all forms of malnutrition, including achieving, by 2025, the internationally agreed targets on stunting and wasting in children under 5 years of age, and address the nutritional needs of adolescent girls, pregnant and lactating women and older persons.	0
2	Zero hunger	Outcome	2.03	By 2030, double the agricultural productivity and incomes of small-scale food producers, in particular women, indigenous peoples, family farmers, pastoralists and fishers, including through secure and equal access to land, other productive resources and inputs, knowledge, financial services, markets and opportunities for value addition and non-farm employment.	1	Bennett, N.J., Calò, A., Di Franco, A., Niccolini, F., Marzo, D., Domina, I., Dimitriadis, C., Sobrado, F., Santoni, M.C., Charbonnel, E. and Trujillo, M., 2020. Social equity and marine protected areas: Perceptions of small-scale fishermen in the Mediterranean Sea. Biological Conservation, 244, p.108531. Klein, E.S. and Watters, G.M., 2020. What’s the catch? Profiling the benefits and costs asso…	5	Those with more socio-economic advantages may be benefiting more than those with less wealth or opportunities, a scenario often described as “elite capture” in the conservation and development literature Klein study: Adjusting the size of closed areas to better encompass predator foraging may slow or halt the depletion of krill-dependent predators no matter how fishing effort redistributes in spa…
2	Zero hunger	Outcome	2.04	By 2030, ensure sustainable food production systems and implement resilient agricultural practices that increase productivity and production, that help maintain ecosystems, that strengthen capacity for adaptation to climate change, extreme weather, drought, flooding and other disasters and that progressively improve land and soil quality.	1	McClure, E.C., Sievers, K.T., Abesamis, R.A., Hoey, A.S., Alcala, A.C. and Russ, G.R., 2020. Higher fish biomass inside than outside marine protected areas despite typhoon impacts in a complex reefscape. Biological Conservation, 241, p.108354. Cinner, JE 2009. Poverty and the use of destructive fishing gear near east African marine protected areas. Environmental Conservation, 36, p: 321-326 Mcleo…	5	McClure et al: MPAs can provide benefits to fish biomass, even when reefs are affected by typhoons. The development of management strategies that incorporate sound coastal land-use practices, while positioning MPAs in areas less prone to typhoon impact, will provide MPAs the best chance of success if climatic extremes increase. Cinner: These findings are broadly consistent with the literature on …	Tregarot et al - suggest best solution is to leave!	I like the Cinner example and I think it works here: MPAs can reduce capacity to mobilize resources (SDG1) which leads to unsustainable behaviours (SDG2). This raises the point that we should acknowledge that SDGs are interacting. We could chat about this in the section where we discuss SDG links
2	Zero hunger	Outcome	2.05	By 2020, maintain the genetic diversity of seeds, cultivated plants and farmed and domesticated animals and their related wild species, including through soundly managed and diversified seed and plant banks at the national, regional and international levels, and promote access to and fair and equitable sharing of benefits arising from the utilization of genetic resources and associated traditiona…	0
2	Zero hunger	Means of Implementation	2.A	Increase investment, including through enhanced international cooperation, in rural infrastructure, agricultural research and extension services, technology development and plant and livestock gene banks in order to enhance agricultural productive capacity in developing countries, in particular least developed countries.	0
2	Zero hunger	Means of Implementation	2.B	Correct and prevent trade restrictions and distortions in world agricultural markets, including through the parallel elimination of all forms of agricultural export subsidies and all export measures with equivalent effect, in accordance with the mandate of the Doha Development Round.	0
2	Zero hunger	Means of Implementation	2.C	Adopt measures to ensure the proper functioning of food commodity markets and their derivatives and facilitate timely access to market information, including on food reserves, in order to help limit extreme food price volatility.	0
3	Good health and well-being	Outcome	3.01	By 2030, reduce the global maternal mortality ratio to less than 70 per 100,000 live births.	0
3	Good health and well-being	Outcome	3.02	By 2030, end preventable deaths of newborns and children under 5 years of age, with all countries aiming to reduce neonatal mortality to at least as low as 12 per 1,000 live births and under-5 mortality to at least as low as 25 per 1,000 live births.	1	Alva, S., Johnson, K., Jacob, A., D’Agnes, H., Mantovani, R. and Evans, T., 2016. Marine protected areas and children’s dietary diversity in the Philippines. Population and environment, 37(3), pp.341-361. Gjertsen, H. 2005. Can Habitat Protection Lead to Improvements in Human Well-Being? Evidence from Marine Protected Areas in the Philippines. World Development, 33, p.199-217. Jones, J.P.G., Andr…	5	Alva: Dietary diversity is an important indicator associated both with child nutritional status (Arimond and Ruel 2004) and household-level food security (Hoddinott and Yisehac 2002). Dietary diversity is also often used as an indicator of adequate micronutrient intake from the diet. While infant and child mortality rates have decreased in the Philippines over the last two decades, malnutrition a…			Really struggled to find refs for this target and duplicated a couple in the end. Will keep looking for alternatives!
3	Good health and well-being	Outcome	3.03	By 2030, end the epidemics of AIDS, tuberculosis, malaria and neglected tropical diseases and combat hepatitis, water-borne diseases and other communicable diseases.	0
3	Good health and well-being	Outcome	3.04	By 2030, reduce by one third premature mortality from non-communicable diseases through prevention and treatment and promote mental health and well-being.	1	Ban, N.C., Gurney, G.G., Marshall, N.A., Whitney, C.K., Mills, M., Gelcich, S., Bennett, N.J., Meehan, M.C., Butler, C., Ban, S. and Tran, T.C., 2019. Well-being outcomes of marine protected areas. Nature Sustainability, 2(6), pp.524-532. Golden et al. 2019. Cohort Description of the Madagascar Health and Environmental Research–Antongil (MAHERY–Antongil) Study in Madagascar. Froniers in Nutrition…	5	Ban: No-take, well-enforced and old marine protected areas had positive human well-being outcomes. More positive (51%) than negative (31%) well-being outcomes reported in the literature. Golden et al: Clinical visits with each individual were conducted at two points during the study to measure disease and nutritional status. By analyzing differences in fish catch arising from variation in governa…	Landrigan et al.: Suggests MPAs are a solution to many of the issues, does not explicitly evaluate MPAs NB: there is a lot of research linking Parkinsons and Alzheimers treatments to marine resources such as fish or algae, but no papers link MPAs	As I mention above, this could be an example where we discuss how SDGs interact. MPAs can increase fish abundance etc which could link to the Parkinsons and Alzheimers research. There are no clear/published links for MPAs and these illnesses and this may highlight a research gap as opposed to no effect. This would be a really nice example to use.	I have added the Silva et al. paper as it uses an increasingly rare seaweed in parkinsons treatment… note the treats to this seaweed are from competition with another species and pollution (from google) so this may be too tenuous
3	Good health and well-being	Outcome	3.05	Strengthen the prevention and treatment of substance abuse, including narcotic drug abuse and harmful use of alcohol.	0
3	Good health and well-being	Outcome	3.06	By 2020, halve the number of global deaths and injuries from road traffic accidents.	0
3	Good health and well-being	Outcome	3.07	By 2030, ensure universal access to sexual and reproductive health-care services, including for family planning, information and education, and the integration of reproductive health into national strategies and programmes.	0
3	Good health and well-being	Outcome	3.08	Achieve universal health coverage, including financial risk protection, access to quality essential health-care services and access to safe, effective, quality and affordable essential medicines and vaccines for all.	0
3	Good health and well-being	Outcome	3.09	By 2030, substantially reduce the number of deaths and illnesses from hazardous chemicals and air, water and soil pollution and contamination.	0	Thought about this one a bit but given the difficulty we have had with finding suitable papers for other well-being targets have not given it a yes
3	Good health and well-being	Means of Implementation	3.A	Strengthen the implementation of the World Health Organization Framework Convention on Tobacco Control in all countries, as appropriate.	0
3	Good health and well-being	Means of Implementation	3.B	Support the research and development of vaccines and medicines for the communicable and noncommunicable diseases that primarily affect developing countries, provide access to affordable essential medicines and vaccines, in accordance with the Doha Declaration on the TRIPS Agreement and Public Health, which affirms the right of developing countries to use to the full the provisions in the Agreemen…	0
3	Good health and well-being	Means of Implementation	3.C	Substantially increase health financing and the recruitment, development, training and retention of the health workforce in developing countries, especially in least developed countries and small island developing States.	0
3	Good health and well-being	Means of Implementation	3.D	Strengthen the capacity of all countries, in particular developing countries, for early warning, risk reduction and management of national and global health risks.	0
4	Quality education	Outcome	4.01	By 2030, ensure that all girls and boys complete free, equitable and quality primary and secondary education leading to relevant and Goal-4 effective learning outcomes	0
4	Quality education	Outcome	4.02	By 2030, ensure that all girls and boys have access to quality early childhood development, care and preprimary education so that they are ready for primary education	0
4	Quality education	Outcome	4.03	By 2030, ensure equal access for all women and men to affordable and quality technical, vocational and tertiary education, including university	0
4	Quality education	Outcome	4.04	By 2030, substantially increase the number of youth and adults who have relevant skills, including technical and vocational skills, for employment, decent jobs and entrepreneurship	1	Chen, D., Garmulewicz, A., Merner, C., Elphinstone, C., Leggott, C. and Dewar, H., 2019. Encouraging youth engagement in marine protected areas: A survey of best practices in Canada. Aquatic Conservation: Marine and Freshwater Ecosystems, 29, pp.223-232. Leisher, C., Mangubhai, S., Hess, S., Widodo, H., Soekirman, T., Tjoe, S., Wawiyai, S., Larsen, S.N., Rumetna, L., Halim, A. and Sanjayan, M., 2…	5	Young people: Hiring youth in MPAs can be a unique opportunity to engage the next generation in conservation: (a) providing youth with work relevant to their interdisciplinary studies; (b) providing employment opportunities that enhance the appreciation and knowledge of the environment, especially pertaining to MPAs; and (c) building capacity and employability skills in today's youth. Investments…		The Plummer and De Witt ref is good. Shows how missing education opportunities can lead to challenges and additional effort down the road
4	Quality education	Outcome	4.05	By 2030, eliminate gender disparities in education and ensure equal access to all levels of education and vocational training for the vulnerable, including persons with disabilities, indigenous peoples and children in vulnerable situations	0
4	Quality education	Outcome	4.06	By 2030, ensure that all youth and a substantial proportion of adults, both men and women, achieve literacy and numeracy	0
4	Quality education	Outcome	4.07	By 2030, ensure that all learners acquire the knowledge and skills needed to promote sustainable development, including, among others, through education for sustainable development and sustainable lifestyles, human rights, gender equality, promotion of a culture of peace and non-violence, global citizenship and appreciation of cultural diversity and of culture’s contribution to sustainable develo…	1	Chen, D., Garmulewicz, A., Merner, C., Elphinstone, C., Leggott, C. and Dewar, H., 2019. Encouraging youth engagement in marine protected areas: A survey of best practices in Canada. Aquatic Conservation: Marine and Freshwater Ecosystems, 29, pp.223-232. Leisher, C., Mangubhai, S., Hess, S., Widodo, H., Soekirman, T., Tjoe, S., Wawiyai, S., Larsen, S.N., Rumetna, L., Halim, A. and Sanjayan, M., 2…	5	Young people: Hiring youth in MPAs can be a unique opportunity to engage the next generation in conservation: (a) providing youth with work relevant to their interdisciplinary studies; (b) providing employment opportunities that enhance the appreciation and knowledge of the environment, especially pertaining to MPAs; and (c) building capacity and employability skills in today's youth. Investments…
4	Quality education	Means of Implementation	4.A	Build and upgrade education facilities that are child, disability and gender sensitive and provide safe, nonviolent, inclusive and effective learning environments for all	0
4	Quality education	Means of Implementation	4.B	By 2020, substantially expand globally the number of scholarships available to developing countries, in particular least developed countries, small island developing States and African countries, for enrolment in higher education, including vocational training and information and communications technology, technical, engineering and scientific programmes, in developed countries and other developi…	0
4	Quality education	Means of Implementation	4.C	By 2030, substantially increase the supply of qualified teachers, including through international cooperation for teacher training in developing countries, especially least developed countries and small island developing states	0
5	Gender equality	Outcome	5.01	End all forms of discrimination against all women and girls everywhere	1	Clabots, B.M., 2013. Gender dimensions of community-based management of marine protected areas in Siquijor, Philippines (Doctoral dissertation). Kleiber, D., Harris, L. and Vincent, A.C., 2018. Gender and marine protected areas: a case study of Danajon Bank, Philippines. Maritime Studies, 17(2), pp.163-175. Endemano Walker, B.L. and Robinson, M.A. 2009. Economic development, marine protected area…	5	Male dominated management of MPAs is inconsistent with the sectors dependence on womens fishing activities; As women gain access to information, power and resources they can suffer from an initial increase in domestic violence; MPAs largely considered to be tools to manage male fisheries; Women less likely than men to report MPAs having a positive impact, less likely to have an active role in MPA…	Pasons et al. note this is directing to a gap in the literature rather than a study itself. Also note not limited to women but also other minority groups	The Parsons ref is great. We have a 'Box' in the paper which discusses SDG5 specifically and I think this would be a good addition to show that we need to be doing more to integrate objectives for equality into MPA planning/management so that we DO monitor these issues and injustices and are not limited by the number of studies
5	Gender equality	Outcome	5.02	Eliminate all forms of violence against all women and girls in the public and private spheres, including trafficking and sexual and other types of exploitation	0
5	Gender equality	Outcome	5.03	Eliminate all harmful practices, such as child, early and forced marriage and female genital mutilation	0
5	Gender equality	Outcome	5.04	Recognize and value unpaid care and domestic work through the provision of public services, infrastructure and social protection policies and the promotion of shared responsibility within the household and the family as nationally appropriate	0
5	Gender equality	Outcome	5.05	Ensure women’s full and effective participation and equal opportunities for leadership at all levels of decisionmaking in political, economic and public life	1	Clabots, B.M., 2013. Gender dimensions of community-based management of marine protected areas in Siquijor, Philippines (Doctoral dissertation). Kleiber, D., Harris, L. and Vincent, A.C., 2018. Gender and marine protected areas: a case study of Danajon Bank, Philippines. Maritime Studies, 17(2), pp.163-175. Baker-Médard, M., 2017. Gendering marine conservation: the politics of marine protected ar…	5	Male dominated management of MPAs is inconsistent with the sectors dependence on womens fihsing activities; As women gain access to information, power and resources they can suffer from an initial increase in domestic violence; MPAs largely considered to be tools to manage male fisheries; Women less likely than men to report MPAs having a positive impact, less likely to have an active role in MPA…
5	Gender equality	Outcome	5.06	Ensure universal access to sexual and reproductive health and reproductive rights as agreed in accordance with the Programme of Action of the International Conference on Population and Development and the Beijing Platform for Action and the outcome documents of their review conferences	0
5	Gender equality	Means of Implementation	5.A	Undertake reforms to give women equal rights to economic resources, as well as access to ownership and control over land and other forms of property, financial services, inheritance and natural resources, in accordance with national laws	2	King, M. and Faasili, U. 2001. Community-based management of subsistence fisheries in Samoa. Fisheries Management and Ecology, 6, p. 133-144. Kamat, V.R. and Kinshella, M-L.W. 2018. Food insecurity and coping strategies in a marine protected area in southeastern Tanzania. Ecology of Food and Nutrition, 57, p. 187-205.	2	King and Faasili: Much subsistence fishing in tropical regions is based in discrete communities which have a high level of marine awareness and some degree of control of adjacent waters. These factors provide an ideal basis on which to motivate communities to manage their own marine resources. A fisheries extension programme in Samoa encouraged each village community to define its key problems, d…
5	Gender equality	Means of Implementation	5.B	Enhance the use of enabling technology, in particular information and communications technology, to promote the empowerment of women	0
5	Gender equality	Means of Implementation	5.C	Adopt and strengthen sound policies and enforceable legislation for the promotion of gender equality and the empowerment of all women and girls at all levels	0
6	Clean water and sanitation	Outcome	6.01	By 2030, achieve universal and equitable access to safe and affordable drinking water for all	0
6	Clean water and sanitation	Outcome	6.02	By 2030, achieve access to adequate and equitable sanitation and hygiene for all and end open defecation, paying special attention to the needs of women and girls and those in vulnerable situations	0
6	Clean water and sanitation	Outcome	6.03	By 2030, improve water quality by reducing pollution, eliminating dumping and minimizing release of hazardous chemicals and materials, halving the proportion of untreated wastewater and substantially increasing recycling and safe reuse globally	1	Abessa, D.M., Albuquerque, H.C., Morais, L.G., Araujo, G.S., Fonseca, T.G., Cruz, A.C., Campos, B.G., Camargo, J.B., Gusso-Choueri, P.K., Perina, F.C. and Choueri, R.B., 2018. Pollution status of marine protected areas worldwide and the consequent toxic effects are unknown. Environmental Pollution, 243, pp.1450-1459. Zann, L.P. 2000, The Eastern Australian Region: a Dynamic Tropical/Temperate Bio…	5	Reduce pollutants and activities which release pollutants Zann: Queensland has a system of marine protected areas (MPAs) while NSW has minimal protected areas. The major issues are declining water qualify, loss of estuarine habitats, degradation of coastal lakes, and localized pollution from heavy metals and sewage in the Sydney area. Luo and Li: Due to long-term environmental pollution and over-…	Luo and Li: check the paper that this is actually an MPA.	I cant find anything to suggest that the Luo and Li paper is related to MPAs. I think it’s a conference paper as well so potentially not peer reviewed or even published? I thin the Braga Castro paper may be more of an example showing how pollution impacts MPAs, but its an important point to acknowledge that pollution from surrounding areas needs to be acknowledged when prioritising areas otherwis…	Added Lamb et al. https://doi.org/10.1098/rstb.2015.0210 NB An additional reference (https://doi.org/10.1186/s12992-019-0509-3) is particualry relevant to goals 6, 13 and 14, but is not specific to any of our targets!
6	Clean water and sanitation	Outcome	6.04	By 2030, substantially increase water-use efficiency across all sectors and ensure sustainable withdrawals and supply of freshwater to address water scarcity and substantially reduce the number of people suffering from water scarcity	0
6	Clean water and sanitation	Outcome	6.05	By 2030, implement integrated water resources management at all levels, including through transboundary cooperation as appropriate	0
6	Clean water and sanitation	Outcome	6.06	By 2020, protect and restore water-related ecosystems, including mountains, forests, wetlands, rivers, aquifers and lakes	1	Zann, L.P. 2000. The Eastern Australian Region: a Dynamic Tropical/Temperate Biotone. Marine Pollution Bulletin, 41, p. 188-203. Wenger, A.s., Williamson, D.H., da Silva, E.T., Ceccarelli, D.M., Browne, N.K., Petus, C., Devlin, M.J. 2015. Effects of reduced water quality on coral reefs in and out of no-take marine reserves. Conservation Biology, 30, p.142-153. Roberts, F., Guarino, C., Arias, M. …	5	Zann: Many of the coastal fisheries are declining, largely because of loss of water quality and wetlands habitats, and in some cases overfishing, Marine environmental management (the responsibility of the two states to the 3 mile limit, and the Commonwealth to the boundary of the 200 mile EEZ) is variable, and largely focused on the urban centres, Queensland has a system of marine protected areas…	Note: The link between freshwater and MPAs is largely that reduced water quality is noted when it runs off into MPAs rather than MPAs have a direct effect on this target. - See also Horizon 2020 initiative (Tackles our qn but the other way around, i.e. the benefits of clean water on MPAs)	These seem good to me. There might also be papers that link MPAs to the protection of natural defences which protect water-related ecosystems, or MPAs which prevent the release of chemicals etc into nearby systems?
6	Clean water and sanitation	Means of Implementation	6.A	By 2030, expand international cooperation and capacity-building support to developing countries in water- and sanitation-related activities and programmes, including water harvesting, desalination, water efficiency, wastewater treatment, recycling and reuse technologies	0
6	Clean water and sanitation	Means of Implementation	6.B	Support and strengthen the participation of local communities in improving water and sanitation management	0
7	Affordable and clean energy	Outcome	7.01	By 2030, ensure universal access to affordable, reliable and modern energy services	0
7	Affordable and clean energy	Outcome	7.02	By 2030, increase substantially the share of renewable energy in the global energy mix	0
7	Affordable and clean energy	Outcome	7.03	By 2030, double the global rate of improvement in energy efficiency	0
7	Affordable and clean energy	Means of Implementation	7.A	By 2030, enhance international cooperation to facilitate access to clean energy research and technology, including renewable energy, energy efficiency and advanced and cleaner fossil-fuel technology, and promote investment in energy infrastructure and clean energy technology	0
7	Affordable and clean energy	Means of Implementation	7.B	By 2030, expand infrastructure and upgrade technology for supplying modern and sustainable energy services for all in developing countries, in particular least developed countries, small island developing States, and land-locked developing countries, in accordance with their respective programmes of support	1	Kyriazi, Z., Maes, F. and Degraer, S., 2016. Coexistence dilemmas in European marine spatial planning practices. The case of marine renewables and marine protected areas. Energy Policy, 97, pp.391-399. Patel,. D., Nagababu, G., Radadia, N., Parsana, S., Sheth, M. and Sheth, N. 2018. GIS-based approach for the evaluation of offshore wind power potential for Gujarat. IOP Conference Series: Earth an…	5	While in most areas MRE-MPA coexistence is not prohibited by law, practice indicates resistance towards it. Furthermore expert judgment demonstrated that a number of additional factors, such as the lack of suitable space for MRE projects and the uncertainty about the extent of damage by MRE to the MPA, might influence the intentions of the two major parties involved (i.e. the MRE developer and th…	Maandal et al: implies that MPAs are a limitation to clean energy.	Nice find
8	Decent work and economic growth	Outcome	8.01	Sustain per capita economic growth in accordance with national circumstances and, in particular, at least 7 per cent gross domestic product growth per annum in the least developed countries	1	Masud, M.M., Aldakhil, A.M., Nassani, A.A. and Azam, M.N., 2017. Community-based ecotourism management for sustainable development of marine protected areas in Malaysia. Ocean & Coastal Management, 136, pp.104-112. Di Franco, A., Thiriet, P., Di Carlo, G., Dimitriadis, C., Francour, P., Gutiérrez, N.L., De Grissac, A.J., Koutsoubas, D., Milazzo, M., del Mar Otero, M. and Piante, C., 2016. Five ke…	6	Eco-tourism: Community-based ecotourism forms the basis for sustainable development. Community development makes essential resources available to the community to improve their standard of living, to safeguard their natural and cultural legacy and to provide them with economic prospects. Di Franco et al., (2016) show that fish stocks are healthier, fishermen incomes are higher and the social acce…			Howson - bonus extra!
8	Decent work and economic growth	Outcome	8.02	Achieve higher levels of economic productivity through diversification, technological upgrading and innovation, including through a focus on high-value added and labour-intensive sectors	1	Russi, D., Pantzar, M., Kettunen, M., Gitti, G., Mutafoglu, K., Kotulak, M. and ten Brink, P., 2016. Socio-economic benefits of the EU marine protected areas. Institute for European Environmental Policy: London, UK. Jaiteh, V., Lindfield, S.J., Mangubhai, S., Warren, C., Fitzpatrick, B. and Loneragan, N.R. 2016. Higher Abundance of Marine Predators and Changes in Fishers' Behavior Following Spati…	5	MPAs can also play an integral role in fostering and trialling novel ideas for future blue bioeconomy, for instance through bioprospecting Jaiteh et al: Few fishers felt that the agencies implementing fishing bans understood their livelihood needs. We found that shark fishers adapted to the loss of former fishing grounds by shifting fishing effort to other locations or diversifying their liveliho…		The Matera ref looks good to me. MPAs encouraged fishers to diversify their livelihoods. Whether they wanted to or were forced to is another question. The important question is whether the policy makers/planners worked with them to help diversify as part of MPA plans etc, or whether fishers had to do it off their own backs.
8	Decent work and economic growth	Outcome	8.03	Promote development-oriented policies that support productive activities, decent job creation, entrepreneurship, creativity and innovation, and encourage the formalization and growth of micro-, small- and medium-sized enterprises, including through access to financial services	0
8	Decent work and economic growth	Outcome	8.04	Improve progressively, through 2030, global resource efficiency in consumption and production and endeavour to decouple economic growth from environmental degradation, in accordance with the 10-year framework of programmes on sustainable consumption and production, with developed countries taking the lead	1	Mesnildrey, L., Gascuel, D. and Le Pape, O., 2013. Integrating Marine Protected Areas in fisheries management systems: some criteria for ecological efficiency. Aquatic Living Resources, 26(2), pp.159-170. Fernandez, P.R. 2007. Understanding Relational Politics in MPA Governance in Northeastern Iloilo, Philippines. Journal of Coastal Research, Special issue 50, p 38-42. Rickels, W., Dovern, J., Qu…	5	Mesnildrey: Adjacent fisheries can increase their catches near closed areas, but such effects are delayed until after MPA establishment and are often limited over distance. Spillover is shown to support increased catch per unit effort (CPUE) for a range of gear types and target species in waters surrounding areas closed from fishing. If the overall fishing pressure inside the site remains the sam…	No specific mention of 10 year framework. (Hard to find papers specific enough for this target)	I think its okay as long as the MPAs are indirectly contributing towards the 10 year plan by influencing resource efficiency. There are unlikely to be any direct mentions as all of the MPA research is siloed/ignores the wider impacts on SDGs, which is part of the issue as planners are unaware that they could be contributing towards initiatives such as this.
8	Decent work and economic growth	Outcome	8.05	By 2030, achieve full and productive employment and decent work for all women and men, including for young people and persons with disabilities, and equal pay for work of equal value	1	McCLANAHAN, T.I.M.O.T.H.Y., Davies, J. and Maina, J., 2005. Factors influencing resource users and managers' perceptions towards marine protected area management in Kenya. Environmental conservation, pp.42-49. Chen, D., Garmulewicz, A., Merner, C., Elphinstone, C., Leggott, C. and Dewar, H., 2019. Encouraging youth engagement in marine protected areas: A survey of best practices in Canada. Aquati…	5	Job-loss: The major industry in this area is beach tourism, and this leads to the loss of local ownership of beach property and employment of people from outside the region who are trained in tourism services Young people: Hiring youth in MPAs can be a unique opportunity to engage the next generation in conservation: (a) providing youth with work relevant to their interdisciplinary studies; (b) p…	Feruzia study site inside an MPA Karras and Agar: No specific mention of youth or disabled, but focus on livelihood stressors from MPA expansion.	Both refs look suitable to me
8	Decent work and economic growth	Outcome	8.06	By 2020, substantially reduce the proportion of youth not in employment, education or training	0
8	Decent work and economic growth	Outcome	8.07	Take immediate and effective measures to eradicate forced labour, end modern slavery and human trafficking and secure the prohibition and elimination of the worst forms of child labour, including recruitment and use of child soldiers, and by 2025 end child labour in all its forms	0
8	Decent work and economic growth	Outcome	8.08	Protect labour rights and promote safe and secure working environments for all workers, including migrant workers, in particular women migrants, and those in precarious employment	0
8	Decent work and economic growth	Outcome	8.09	By 2030, devise and implement policies to promote sustainable tourism that creates jobs and promotes local culture and products	1	Masud, M.M., Aldakhil, A.M., Nassani, A.A. and Azam, M.N., 2017. Community-based ecotourism management for sustainable development of marine protected areas in Malaysia. Ocean & Coastal Management, 136, pp.104-112. Pantzar, M., Russi, D., Hooper, T., Haines, R. 2017, Study on the economic benefits of Marine Protected Areas, European Commission, , Luxembourg, Publication Office of the EW GARNIER, …	5	Eco-tourism: Community-based ecotourism forms the basis for sustainable development. Community development makes essential resources available to the community to improve their standard of living, to safeguard their natural and cultural legacy and to provide them with economic prospects. In Vamizi Island in Mozambique, which is a potential World Heritage marine site, the development of cultural t…	note Dixon paper from 1993	I'm happy with that
8	Decent work and economic growth	Outcome	8.1	Strengthen the capacity of domestic financial institutions to encourage and expand access to banking, insurance and financial services for all	0
8	Decent work and economic growth	Means of Implementation	8.A	Increase Aid for Trade support for developing countries, in particular least developed countries, including through the Enhanced Integrated Framework for Trade-Related Technical Assistance to Least Developed Countries	0
8	Decent work and economic growth	Means of Implementation	8.B	By 2020, develop and operationalize a global strategy for youth employment and implement the Global Jobs Pact of the International Labour Organization	0
9	Industries, innovation and infrastructure	Outcome	9.01	Develop quality, reliable, sustainable and resilient infrastructure, including regional and transborder infrastructure, to support economic development and human well-being, with a focus on affordable and equitable access for all	1	Cánovas-Molina, A. and García-Frapolli, E., 2020. Untangling worldwide conflicts in marine protected areas: Five lessons from the five continents. Marine Policy, p.104185. Fauzi, A. and Buchary, E.A. 2010. A socioeconomic perspective of environmental degradation at Kepulauan Seribu Marine National Park, Indonesia. Coastal Management, 30, p. 167-181. Mancha-Cisneros, M. del Mar, Suarez-Castillo, A…	5	Source of conflict with MPAs: Structures (e. g. dikes, wind turbines) big enough to have deep social and ecological effects in the MPA In MPAs with ‘tourism pressure’ two consequences were found. In some cases, it accentuated the scarcity of resources as public infrastructure, food and services leading eventually to inflation prices. In other cases, tourism pressure led to ecosystem deterioration…	This target is a bit difficult to find specifics for, need to check I havent shoehorned some refs into this one	There are quite a few papers that talk about (1) the difficulties in developing transborder MPAs and (2) how MPAs can improve transborder cooperation which might be aplicable here if we have any	NB: the Portman paper is one I looked for independently of the webofscience database. Is it ok to use anyway?
9	Industries, innovation and infrastructure	Outcome	9.02	Promote inclusive and sustainable industrialization and, by 2030, significantly raise industry’s share of employment and gross domestic product, in line with national circumstances, and double its share in least developed countries	0
9	Industries, innovation and infrastructure	Outcome	9.03	Increase the access of small-scale industrial and other enterprises, in particular in developing countries, to financial services, including affordable credit, and their integration into value chains and markets	0
9	Industries, innovation and infrastructure	Outcome	9.04	By 2030, upgrade infrastructure and retrofit industries to make them sustainable, with increased resource-use efficiency and greater adoption of clean and environmentally sound technologies and industrial processes, with all countries taking action in accordance with their respective capabilities	0
9	Industries, innovation and infrastructure	Outcome	9.05	Enhance scientific research, upgrade the technological capabilities of industrial sectors in all countries, in particular developing countries, including, by 2030, encouraging innovation and substantially increasing the number of research and development workers per 1 million people and public and private research and development spending	1	Russi, D., Pantzar, M., Kettunen, M., Gitti, G., Mutafoglu, K., Kotulak, M. and ten Brink, P., 2016. Socio-economic benefits of the EU marine protected areas. Institute for European Environmental Policy: London, UK. Christie, P. and White, A.T., 2007. Best practices for improved governance of coral reef marine protected areas. Coral Reefs, 26(4), pp.1047-1056. Fulton, S., et al. 2019. Untapped Po…	5	MPAs can also play an integral role in fostering and trialling novel ideas for future blue bioeconomy, for instance through bioprospecting Technical assistance, education, and capacity development are clearly some of the cornerstones of developing eVective MPA governance. In the most successful examples of MPAs (e.g., Apo Island, Tubbataha, GBRMP) long-term institutional support has been availabl…
9	Industries, innovation and infrastructure	Means of Implementation	9.A	Facilitate sustainable and resilient infrastructure development in developing countries through enhanced financial, technological and technical support to African countries, least developed countries, landlocked developing countries and small island developing States 18	1	Hill, L.S., Johnson, J.A. and Adamowski, J., 2016. Meeting Aichi Target 11: Equity considerations in marine protected areas design. Ocean & Coastal Management, 134, pp.112-119. Cinner, JE 2009. Poverty and the use of destructive fishing gear near east African marine protected areas. Environmental Conservation, 36, p: 321-326 Habtemariam, B.T. and Fang, Q. 2016. Zoning for a multiple-use marine pr…	5	Hill: In SIDS and coastal communities of developing countries for instance, user needs, particularly local and indigenous participation, are often not taken into consideration (Jones, 2001, Spalding et al., 2013), showing disappointing conservation results such as collapse of species and further degradation of the protected area facilitating equity requirement in the MPA design process from incep…			Dicken - too tenuous?
9	Industries, innovation and infrastructure	Means of Implementation	9.B	Support domestic technology development, research and innovation in developing countries, including by ensuring a conducive policy environment for, inter alia, industrial diversification and value addition to commodities	0
9	Industries, innovation and infrastructure	Means of Implementation	9.C	Significantly increase access to information and communications technology and strive to provide universal and affordable access to the Internet in least developed countries by 2020	0
10	Reduced inequalities	Outcome	10.01	By 2030, progressively achieve and sustain income growth of the bottom 40 per cent of the population at a rate higher than the national average	1	Bennett, N.J., Calò, A., Di Franco, A., Niccolini, F., Marzo, D., Domina, I., Dimitriadis, C., Sobrado, F., Santoni, M.C., Charbonnel, E. and Trujillo, M., 2020. Social equity and marine protected areas: Perceptions of small-scale fishermen in the Mediterranean Sea. Biological Conservation, 244, p.108531. Khuu, D.T., Jones, P.J.S., Ekins, P. 2021. Governance analysis of Nha Trang Bay and Cu Lao C…	5	Those with more socio-economic advantages may be benefiting more than those with less wealth or opportunities, a scenario often described as “elite capture” in the conservation and development literature Can link back to all of the poverty refs too Khuu et al: This paper stresses that without interventions from the central government or even international actors, the current MPA governance framew…	This target is very specific so I have had to widen the lens a little	I think that’s fair with this one. Papers showing how MPAs either benefit the poor or deepen existing inequalities can fit here (its fine to duplicate papers if they apply to multiple targets)
10	Reduced inequalities	Outcome	10.02	By 2030, empower and promote the social, economic and political inclusion of all, irrespective of age, sex, disability, race, ethnicity, origin, religion or economic or other status	1	McCLANAHAN, T.I.M.O.T.H.Y., Davies, J. and Maina, J., 2005. Factors influencing resource users and managers' perceptions towards marine protected area management in Kenya. Environmental conservation, pp.42-49. Cánovas-Molina, A. and García-Frapolli, E., 2020. Untangling worldwide conflicts in marine protected areas: Five lessons from the five continents. Marine Policy, p.104185. von Helanda, F. a…	5	Consequently, a combination of improved chances for formal education, more employment options, reinstatement of public or community ownership of beach property, and working more closely with local and informal government could improve attitudes towards national management in this region. Can lead to feelings of exclusion from the process when a group percieve they have been neglected from decisio…
10	Reduced inequalities	Outcome	10.03	Ensure equal opportunity and reduce inequalities of outcome, including by eliminating discriminatory laws, policies and practices and promoting appropriate legislation, policies and action in this regard	1	Gustavsson, M., Lindström, L., Jiddawi, N.S. and De La Torre-Castro, M., 2014. Procedural and distributive justice in a community-based managed marine protected area in Zanzibar, Tanzania. Marine Policy, 46, pp.91-100. Cánovas-Molina, A. and García-Frapolli, E., 2020. Untangling worldwide conflicts in marine protected areas: Five lessons from the five continents. Marine Policy, p.104185. Lucrezi,…	5	What government perceived as the provision of alternative livelihoods to communities (alternative fishing and tourism) might result in conflicts and injustice within and between communities around MPAs Inequalities in the distribution of MPA benefits Education and capacity-building initiatives, in particular, have the potential to empower stakeholders, promote collaboration, create a culture of m…
10	Reduced inequalities	Outcome	10.04	Adopt policies, especially fiscal, wage and social protection policies, and progressively achieve greater equality	0
10	Reduced inequalities	Outcome	10.05	Improve the regulation and monitoring of global financial markets and institutions and strengthen the implementation of such regulations	0
10	Reduced inequalities	Outcome	10.06	Ensure enhanced representation and voice for developing countries in decision-making in global international economic and financial institutions in order to deliver more effective, credible, accountable and legitimate institutions	1	Lucrezi, S., Esfehani, M.H., Ferretti, E. and Cerrano, C., 2019. The effects of stakeholder education and capacity building in marine protected areas: A case study from southern Mozambique. Marine Policy, 108, p.103645. De Santo, E.M., Jones, P.J. and Miller, A.M.M., 2011. Fortress conservation at sea: a commentary on the Chagos marine protected area. Marine Policy, 35(2), pp.258-260. Chan, N. 20…	5	Education and capacity-building initiatives, in particular, have the potential to empower stakeholders, promote collaboration, create a culture of marine stewardship and encourage alternative and sustainable livelihoods. De Santo: Chagos paper: displacement and ignoring needs of indeginous people Chan: Small island states are typically portrayed as vulnerable and insignificant actors in internati…			Moved McClanahan et al to here but agree it could also go in 16.07
10	Reduced inequalities	Outcome	10.07	Facilitate orderly, safe, regular and responsible migration and mobility of people, including through the implementation of planned and well-managed migration policies	0
10	Reduced inequalities	Means of Implementation	10.A	Implement the principle of special and differential treatment for developing countries, in particular least developed countries, in accordance with World Trade Organization agreements	0	Di Franco, A., Hogg, K.E., Calò, A., Bennett, N.J., Sévin-Allouet, M.A., Alaminos, O.E., Lang, M., Koutsoubas, D., Prvan, M., Santarossa, L. and Niccolini, F., 2020. Improving marine protected area governance through collaboration and co-production. Journal of Environmental Management, 269, p.110757. Christie, P., Bennett, N.J., Gray, N.J., Wilhelm, A., Lewis, N., Parks, J., Ban, N.C., Gruby, R.L…	5	Collaborative conservation initiatives that engage stakeholders in action research and knowledge co-production processes can enhance management and governance of MPAs. Findings highlight that employing good governance processes involving stakeholders may rapidly generate improved local support for conservation and provide insights for potential leverage points upon which to act to maximize percei…	I'm not sure I fully understand this target, so I have used the first paper as a guide and focused on papers re: governance and stakeholder inclusion…	I think we can probably cut this one.
10	Reduced inequalities	Means of Implementation	10.B	Encourage official development assistance and financial flows, including foreign direct investment, to States where the need is greatest, in particular least developed countries, African countries, small island developing States and landlocked developing countries, in accordance with their national plans and programmes	0
10	Reduced inequalities	Means of Implementation	10.C	By 2030, reduce to less than 3 per cent the transaction costs of migrant remittances and eliminate remittance corridors with costs higher than 5 per cent	0
11	Sustainable cities and communities	Outcome	11.01	By 2030, ensure access for all to adequate, safe and affordable housing and basic services and upgrade slums	1	Cánovas-Molina, A. and García-Frapolli, E., 2020. Untangling worldwide conflicts in marine protected areas: Five lessons from the five continents. Marine Policy, p.104185. Cicin-Sain, B. and Belfiore, S., 2005. Linking marine protected areas to integrated coastal and ocean management: a review of theory and practice. Ocean & Coastal Management, 48(11-12), pp.847-868. Potts, T., Burdon, D., Jackso…	6	Communities displacement: people living close to MPAs expelled from their homes and deprived of their property Protect public safety in coastal and marine areas typically prone to significant natural, as well as human-made, hazards Important ecosystem services for safe living: prevention of coastal erosion; sea defence; clean water and sediments Charles and Wilson: Planning, implementing, and man…			Mascia and Claus: another bonus
11	Sustainable cities and communities	Outcome	11.02	By 2030, provide access to safe, affordable, accessible and sustainable transport systems for all, improving road safety, notably by expanding public transport, with special attention to the needs of those in vulnerable situations, women, children, persons with disabilities and older persons	0
11	Sustainable cities and communities	Outcome	11.03	By 2030, enhance inclusive and sustainable urbanization and capacity for participatory, integrated and sustainable human settlement planning and management in all countries	0
11	Sustainable cities and communities	Outcome	11.04	Strengthen efforts to protect and safeguard the world’s cultural and natural heritage	1	Rist, P., Rassip, W., Yunupingu, D., Wearne, J., Gould, J., Dulfer‐Hyams, M., Bock, E. and Smyth, D., 2019. Indigenous protected areas in Sea Country: Indigenous‐driven collaborative marine protected areas in Australia. Aquatic Conservation: Marine and Freshwater Ecosystems, 29, pp.138-151. Voyer, M., Gladstone, W and Goodall, H. 2013. Understanding marine park opposition: the relationship betwee…	5	Close off areas of cultural and natural heritage to damiging extractive pressures... Give control to local and indiginous populations Voyer: They explored the social impacts of the declaration of PSGLMP and BMP and their link to marine park opposition. Opponents felt the marine parks had resulted in a variety of negative impacts ranging from a loss of enjoyment and convenience through to more ser…
11	Sustainable cities and communities	Outcome	11.05	By 2030, significantly reduce the number of deaths and the number of people affected and substantially decrease the direct economic losses relative to global gross domestic product caused by disasters, including water-related disasters, with a focus on protecting the poor and people in vulnerable situations	1	Potts, T., Burdon, D., Jackson, E., Atkins, J., Saunders, J., Hastings, E. and Langmead, O., 2014. Do marine protected areas deliver flows of ecosystem services to support human welfare?. Marine Policy, 44, pp.139-148. Takasaki, Y. 2015. Learning from disaster: community-based marine protected areas in Fiji. Environment and development economics. 21, p.53-77 Mehedi Masud, M., Sackor, A.S., Ferdou…	5	Important ecosystem services for safe living: prevention of coastal erosion; sea defence; clean water and sediments Takasaki: Controlling for the endogeneity of household-level cyclone damage reveals that a household's exposure to the disaster increases its support for establishing marine protected areas, presumably for future safety nets. Evidence suggests that community members' social learning…	Giampieri: need to check is an MPA	The Takasaki reference is really interesting. I don’t think the Giampieri ref is about MPAs so we should remove	Not important but possibly noteworthy, Masud has published a number of papers we are using for this ms, perhaps there are more by this author that could be of use?
11	Sustainable cities and communities	Outcome	11.06	By 2030, reduce the adverse per capita environmental impact of cities, including by paying special attention to air quality and municipal and other waste management	0
11	Sustainable cities and communities	Outcome	11.07	By 2030, provide universal access to safe, inclusive and accessible, green and public spaces, in particular for women and children, older persons and persons with disabilities	1	De Santo, E.M., Jones, P.J. and Miller, A.M.M., 2011. Fortress conservation at sea: a commentary on the Chagos marine protected area. Marine Policy, 35(2), pp.258-260. Richmond, L. and Kotowicz, D., 2015. Equity and access in marine protected areas: The history and future of ‘traditional indigenous fishing’in the Marianas Trench Marine National Monument. Applied Geography, 59, pp.117-124. Kleiber…	5	An over-zealous focus on ensuring the effectiveness of the Chagos MPA and the neglect of providing for equity and human rights could signal that fortress conservation is alive and well at sea, rather than having been relegated to colonial history Regulation of fishing in the new MPA has the potential to directly and indirectly restrict local access to these culturally important waters. There is c…
11	Sustainable cities and communities	Means of Implementation	11.A	Support positive economic, social and environmental links between urban, peri-urban and rural areas by strengthening national and regional development planning	0
11	Sustainable cities and communities	Means of Implementation	11.B	By 2020, substantially increase the number of cities and human settlements adopting and implementing integrated policies and plans towards inclusion, resource efficiency, mitigation and adaptation to climate change, resilience to disasters, and develop and implement, in line with the Sendai Framework for Disaster Risk Reduction 2015-2030, holistic disaster risk management at all levels	1	Tittensor, D.P., Beger, M., Boerder, K., Boyce, D.G., Cavanagh, R.D., Cosandey-Godin, A., Crespo, G.O., Dunn, D.C., Ghiffary, W., Grant, S.M. and Hannah, L., 2019. Integrating climate adaptation and biodiversity conservation in the global ocean. Science advances, 5(11), p.eaay9969. Wilson, K.L., Tittensor, D.P., Worm, B. and Lotze, H.K., 2020. Incorporating climate change adaptation into marine p…	5	Unless accounted for, climate change will erode the effectiveness of MPA networks and their associated benefits through changes in the phenology, distribution, and composition of marine ecosystems Incorporating climate change adaptation strategies across every stage of the planning process maximizes the likelihood that MPAs will effectively protect marine biodiversity in a changing climate. The o…	No paper specifically refers to the Sendai Framework for Disaster Risk Reduction 2015-2030	I think this is similar to 8.04. MPAs will be a crticial component of plans to adapt and mitigate climate change so will be indirectly contributing to the Sendai Framework
11	Sustainable cities and communities	Means of Implementation	11.C	Support least developed countries, including through financial and technical assistance, in building sustainable and resilient buildings utilizing local materials	0
12	Responsible consumption and production	Outcome	12.01	Implement the 10-year framework of programmes on sustainable consumption and production, all countries taking action, with developed countries taking the lead, taking into account the development and capabilities of developing countries	0
12	Responsible consumption and production	Outcome	12.02	By 2030, achieve the sustainable management and efficient use of natural resources	1	Kuempel, C.D., Jones, K.R., Watson, J.E. and Possingham, H.P., 2019. Quantifying biases in marine‐protected‐area placement relative to abatable threats. Conservation Biology, 33(6), pp.1350-1359. Zupan, M., Bulleri, F., Evans, J., Fraschetti, S., Guidetti, P., Garcia-Rubies, A., Sostres, M., Asnaghi, V., Caro, A., Deudero, S. and Goñi, R., 2018. How good is your marine protected area at curbing t…	5	Relatively low-threat ecoregions had 6.3 times more strict protection (International Union for Conservation of Nature categories I–II) than high-threat ecoregions. Thirty-one ecoregions had high levels of stoppable threat but very low protection Zupan et al show that fully protected areas effectively eliminate extractive activities, whereas the intensity of artisanal and recreational fishing with…
12	Responsible consumption and production	Outcome	12.03	By 2030, halve per capita global food waste at the retail and consumer levels and reduce food losses along production and supply chains, including post-harvest losses	0
12	Responsible consumption and production	Outcome	12.04	By 2020, achieve the environmentally sound management of chemicals and all wastes throughout their life cycle, in accordance with agreed international frameworks, and significantly reduce their release to air, water and soil in order to minimize their adverse impacts on human health and the environment	1	Abessa, D.M., Albuquerque, H.C., Morais, L.G., Araujo, G.S., Fonseca, T.G., Cruz, A.C., Campos, B.G., Camargo, J.B., Gusso-Choueri, P.K., Perina, F.C. and Choueri, R.B., 2018. Pollution status of marine protected areas worldwide and the consequent toxic effects are unknown. Environmental Pollution, 243, pp.1450-1459. Lonsdale, J-A., Blake, S., Griffith, A. 2021. A novel systematic, risk based app…	5	Abessa et al.: results may indicate that sites chosen as MPAs are not under severe influence of pollution sources, or that the establishment of MPAs is a factor that can reduce pollutant concentrations; however, any conclusion regarding this issue would require new studies and the knowledge of the processes which led the legal protection of the area in question. Lonsdale et al.: The Tool in this …	Note: Longsdale et al, abstract does not make specific ref to MPAs but appears appliciable to waste disposal
12	Responsible consumption and production	Outcome	12.05	By 2030, substantially reduce waste generation through prevention, reduction, recycling and reuse	0
12	Responsible consumption and production	Outcome	12.06	Encourage companies, especially large and transnational companies, to adopt sustainable practices and to integrate sustainability information into their reporting cycle	0
12	Responsible consumption and production	Outcome	12.07	Promote public procurement practices that are sustainable, in accordance with national policies and priorities	0
12	Responsible consumption and production	Outcome	12.08	By 2030, ensure that people everywhere have the relevant information and awareness for sustainable development and lifestyles in harmony with nature	1	Leisher, C., Mangubhai, S., Hess, S., Widodo, H., Soekirman, T., Tjoe, S., Wawiyai, S., Larsen, S.N., Rumetna, L., Halim, A. and Sanjayan, M., 2012. Measuring the benefits and costs of community education and outreach in marine protected areas. Marine Policy, 36(5), pp.1005-1011. Bennett, N.J. and Dearden, P., 2014. Why local people do not support conservation: Community perceptions of marine pro…	5	Leishers et al: study demonstrates that investments in MPA education and outreach can generate increases in local knowledge and positive attitudes, and changing knowledge and attitudes is expected to contribute to the long-term compliance with MPA regulations Within the study area, local people had a greater knowledge of environmental issues and more positive attitudes towards MPAs and environmen…	Blue text indicates a second opinion needed	Not sure about the blue text in this one. I think the refs should be more about outreach and capacity development. But this ref is a good one for stakeholder engagement.	Moved Weeks to 17.16
12	Responsible consumption and production	Means of Implementation	12.A	Support developing countries to strengthen their scientific and technological capacity to move towards more sustainable patterns of consumption and production	1	Retka, J., Jepson, P., Ladle, R.J., Malhado, A.C., Vieira, F.A., Normande, I.C., Souza, C.N., Bragagnolo, C. and Correia, R.A., 2019. Assessing cultural ecosystem services of a large marine protected area through social media photographs. Ocean & Coastal Management, 176, pp.40-48. Russi, D., Pantzar, M., Kettunen, M., Gitti, G., Mutafoglu, K., Kotulak, M. and ten Brink, P., 2016. Socio-economic b…	5	Indigenous protected areas: funding now supports several Indigenous Ranger groups across the Great Barrier Reef, allowing those groups to build their capacity for natural and cultural resource management MPAs can also offer improved opportunities for research and education by ensuring long-term conservation of marine species and ecosystems Kamat: Results of the study reveal that unresolved tensio…
12	Responsible consumption and production	Means of Implementation	12.B	Develop and implement tools to monitor sustainable development impacts for sustainable tourism that creates jobs and promotes local culture and products	1	Crabbe, M.J.C., Martinez, E., Garcia, C., Chub, J., Castro, L. and Guy, J., 2009. Is capacity building important in policy development for sustainability? A case study using action plans for sustainable Marine Protected Areas in Belize. Society and Natural Resources, 23(2), pp.181-190. Hadwen, W.L., Hill, W. and Pickering, C.M., 2008. Linking visitor impact research to visitor impact monitoring i…	5	The involvement of a fisheries officer resulted in direct transfer of information from the communities to the government department. The personal action plans involve improvements to organization and management, education, support, and policy development. In addition, three NGOs, TASTE (Toledo Association for Sustainable Tourism and Empowerment), TIDE (Toledo Institute for Development and Environ…		The McClanahan reference might be better for 10.03, 10.06 or 16.07	Moved to 10.06 but agree could also go in 16.07
12	Responsible consumption and production	Means of Implementation	12.C	Rationalize inefficient fossil-fuel subsidies that encourage wasteful consumption by removing market distortions, in accordance with national circumstances, including by restructuring taxation and phasing out those harmful subsidies, where they exist, to reflect their environmental impacts, taking fully into account the specific needs and conditions of developing countries and minimizing the poss…	0
13	Climate action	Outcome	13.01	Strengthen resilience and adaptive capacity to climate-related hazards and natural disasters in all countries	1	Micheli, F., Saenz-Arroyo, A., Gre+G5enley, A., Vazquez, L., Montes, J.A.E., Rossetto, M. and De Leo, G.A., 2012. Evidence that marine reserves enhance resilience to climatic impacts. PloS one, 7(7), p.e40832. Bates, A.E., Cooke, R.S., Duncan, M.I., Edgar, G.J., Bruno, J.F., Benedetti-Cecchi, L., Côté, I.M., Lefcheck, J.S., Costello, M.J., Barrett, N. and Bird, T.J., 2019. Climate resilience in m…	5	Under future scenarios of frequent and/or persistent disturbance [43], increasing resilience to climatic impacts through networks of marine reserves may be the most effective tool that local communities and nations worldwide have to combat the negative impacts of global climate change on marine ecosystems and livelihoods resilience responses in real world communities are also complicated by the l…			NB An additional reference (https://doi.org/10.1186/s12992-019-0509-3) is particualry relevant to goals 6, 13 and 14, but is not specific to any of our targets!
13	Climate action	Outcome	13.02	Integrate climate change measures into national policies, strategies and planning	0
13	Climate action	Outcome	13.03	Improve education, awareness-raising and human and institutional capacity on climate change mitigation, adaptation, impact reduction and early warning	1	Cvitanovic, C., Marshall, N.A., Wilson, S.K., Dobbs, K. and Hobday, A.J., 2014. Perceptions of Australian marine protected area managers regarding the role, importance, and achievability of adaptation for managing the risks of climate change. Ecology and Society, 19(4). Mcleod, E., Anthony, K.R., Mumby, P.J., Maynard, J., Beeden, R., Graham, N.A., Heron, S.F., Hoegh-Guldberg, O., Jupiter, S., Mac…	5	Cvitanovic et al: Ineffective communication between scientists and environmental decision makers represents one of the key barriers limiting the integration of science into the decision-making process in many areas of natural resource management Cvitanovic et al found that although MPA managers have a very strong awareness of the range and severity of risks posed by climate change, their understa…	Note Takasaki already used in previous climate related target.	Its fine to duplicate references as some papers cover multiple SDGs. This paper sits really well in both climate targets
13	Climate action	Means of Implementation	13.A	Implement the commitment undertaken by developed-country parties to the United Nations Framework Convention on Climate Change to a goal of mobilizing jointly $100 billion annually by 2020 from all sources to address the needs of developing countries in the context of meaningful mitigation actions and transparency on implementation and fully operationalize the Green Climate Fund through its capita…	0
13	Climate action	Means of Implementation	13.B	Promote mechanisms for raising capacity for effective climate change-related planning and management in least developed countries and small island developing States, including focusing on women, youth and local and marginalized communities	0
14	Life below water	Outcome	14.01	By 2025, prevent and significantly reduce marine pollution of all kinds, in particular from land-based activities, including marine debris and nutrient pollution	1	Cánovas-Molina, A. and García-Frapolli, E., 2020. Untangling worldwide conflicts in marine protected areas: Five lessons from the five continents. Marine Policy, p.104185. Davies, T.W., Duffy, J.P., Bennie, J. and Gaston, K.J., 2016. Stemming the tide of light pollution encroaching into marine protected areas. Conservation Letters, 9(3), pp.164-171. Liubartseva, S., Coppini, G. and Lecci, R., 201…	5	Tourism pressure: activities have negative socio-ecological effects in the MPA Davies et al: Allocating “Marine Dark Sky Park” status to MPAs will help incentivize responsible authorities to hold back the advance of artificial light Liubartseva: The fluxes of plastic onto MPA coastlines (0.4–3.6 kg (km day)−1) are found to be relatively low in comparison with an average flux of 6.2 ± 0.8 kg (km d…			NB An additional reference (https://doi.org/10.1186/s12992-019-0509-3) is particualry relevant to goals 6, 13 and 14, but is not specific to any of our targets!
14	Life below water	Outcome	14.02	By 2020, sustainably manage and protect marine and coastal ecosystems to avoid significant adverse impacts, including by strengthening their resilience, and take action for their restoration in order to achieve healthy and productive oceans	1	N.S. Barrett, G.J. Edgar, C.D. Buxton, M. Haddon Changes in fish assemblages following 10 years of protection in Tasmanian marine protected areas J. Exp. Mar. Biol. Ecol., 345 (2007), pp. 141-157, 10.1016/j.jembe.2007.02.007 Harmelin-Vivien, M., Cottalorda, J.M., Dominici, J.M., Harmelin, J.G., Le Diréach, L. and Ruitton, S., 2015. Effects of reserve protection level on the vulnerable fish specie…	5	Barrett: 10-fold increase in the abundance of large fish and a doubling of per site species richness of large fish within the Tinderbox Marine Reserve relative to controls Harmelin-Vivien: Partial protection (no recreational fishing, adequate regulation of professional fishing), which is better accepted by professional fishers than total protection, might allow S. umbra to maintain relatively abu…
14	Life below water	Outcome	14.03	Minimize and address the impacts of ocean acidification, including through enhanced scientific cooperation at all levels	0
14	Life below water	Outcome	14.04	By 2020, effectively regulate harvesting and end overfishing, illegal, unreported and unregulated fishing and destructive fishing practices and implement science-based management plans, in order to restore fish stocks in the shortest time feasible, at least to levels that can produce maximum sustainable yield as determined by their biological characteristics	1	Cánovas-Molina, A. and García-Frapolli, E., 2020. Untangling worldwide conflicts in marine protected areas: Five lessons from the five continents. Marine Policy, p.104185. Roberts, C. M., Branch, G., Bustamante, R. H., Castilla, J. C., Dugan, J., Halpern, B. S., et al. (2003). Application of ecological criteria in selecting marine reserves and developing reserve networks. Ecol. Appl. 13, S215–S22…	5	Illegal fishing: MPA rules being violated (often when MPA implementation fails to consider peoples needs) Roberts: The appropiate design of MPA networks allows conservation and fishery objectives to be coupled and can provide ecological and recreational services of value Muallil: Results showed that fish biomass levels in 7%, 25% and 68% of the surveyed MPAs were “above BMMSY”, “within BMMSY” and…
14	Life below water	Outcome	14.05	By 2020, conserve at least 10 per cent of coastal and marine areas, consistent with national and international law and based on the best available scientific information	1	Devillers, R., Pressey, R.L., Ward, T.J., Grech, A., Kittinger, J.N., Edgar, G.J. and Watson, R.A., 2020. Residual marine protected areas five years on: Are we still favouring ease of establishment over need for protection?. Aquatic Conservation: Marine and Freshwater Ecosystems, 30(9), pp.1758-1764. Rees, S., Pittman, S.J., Foster, N., Langmead, O., Griffiths, C., Fletcher, S., Johnson, D.E., At…	6	Devillers: governments […] remain focused on a simple quantifiable metric (i.e. area) as an indicator of progress’, ‘aiming for international percentage targets […] rather than aiming for the best possible conservation outcomes. Targets for extent can be counterproductive because they can be most expediently achieved in residual areas Rees et al: Marine Protected Areas (MPAs) and networks of MPAs…
14	Life below water	Outcome	14.06	By 2020, prohibit certain forms of fisheries subsidies which contribute to overcapacity and overfishing, eliminate subsidies that contribute to illegal, unreported and unregulated fishing and refrain from introducing new such subsidies, recognizing that appropriate and effective special and differential treatment for developing and least developed countries should be an integral part of the World…	0
14	Life below water	Outcome	14.07	By 2030, increase the economic benefits to Small Island developing States and least developed countries from the sustainable use of marine resources, including through sustainable management of fisheries, aquaculture and tourism	1	Hill, L.S., Johnson, J.A. and Adamowski, J., 2016. Meeting Aichi Target 11: Equity considerations in marine protected areas design. Ocean & Coastal Management, 134, pp.112-119. Jumeau, R., 2013, April. Small island developing states, large ocean states. In Expert Group Meeting on Oceans, Seas and Sustainable Development: Implementation and follow-up to Rio (Vol. 20). Teelucksingh, S., Nunes, P.A.…	5	Hill: Protected areas have been used by local communities, indigenous people, governments and private organizations to safeguard important especially in Small Islands Developing States (SIDS) and coastal communities of developing countries. MPAs can have significant socio-economic implications for communities that live near them and use their resources, which in turn can dramatically affect the c…
14	Life below water	Means of Implementation	14.A	Increase scientific knowledge, develop research capacity and transfer marine technology, taking into account the Intergovernmental Oceanographic Commission Criteria and Guidelines on the Transfer of Marine Technology, in order to improve ocean health and to enhance the contribution of marine biodiversity to the development of developing countries, in particular small island developing States and …	0
14	Life below water	Means of Implementation	14.B	Provide access for small-scale artisanal fishers to marine resources and markets	1	Said, A., MacMillan, D., Schembri, M. and Tzanopoulos, J., 2017. Fishing in a congested sea: What do marine protected areas imply for the future of the Maltese artisanal fleet?. Applied Geography, 87, pp.245-255. Madrigal-Ballestero, R., Albers, H.J., Capitán, T. and Salas, A., 2017. Marine protected areas in Costa Rica: How do artisanal fishers respond?. Ambio, 46(7), pp.787-796. D'agata, S., Da…	5	Presence of violence (direct attacks or threats between stakeholders or violence caused by unequitable treatment of peoples socio-economic needs) Said et al: Artisanal fishermen have been forced to give up fishing grounds or co-exist with other uses to the point where the ability to fish is becoming increasingly challenging. Since there does not seem to be effective MPA consultation mechanisms th…
14	Life below water	Means of Implementation	14.C	Enhance the conservation and sustainable use of oceans and their resources by implementing international law as reflected in UNCLOS, which provides the legal framework for the conservation and sustainable use of oceans and their resources, as recalled in paragraph 158 of The Future We Want	0
15	Life on land	Outcome	15.01	By 2020, ensure the conservation, restoration and sustainable use of terrestrial and inland freshwater ecosystems and their services, in particular forests, wetlands, mountains and drylands, in line with obligations under international agreements	0
15	Life on land	Outcome	15.02	By 2020, promote the implementation of sustainable management of all types of forests, halt deforestation, restore degraded forests and substantially increase afforestation and reforestation globally	0
15	Life on land	Outcome	15.03	By 2030, combat desertification, restore degraded land and soil, including land affected by desertification, drought and floods, and strive to achieve a land degradation-neutral world	0
15	Life on land	Outcome	15.04	By 2030, ensure the conservation of mountain ecosystems, including their biodiversity, in order to enhance their capacity to provide benefits that are essential for sustainable development	0
15	Life on land	Outcome	15.05	Take urgent and significant action to reduce the degradation of natural habitats, halt the loss of biodiversity and, by 2020, protect and prevent the extinction of threatened species	1	Menéndez, P., Losada, I.J., Torres-Ortega, S., Narayan, S. and Beck, M.W., 2020. The global flood protection benefits of mangroves. Scientific Reports, 10(1), pp.1-11. Halpern, B.S., Selkoe, K.A., White, K.A., Albert, S., Aswani, S. and Lauer, M. 2012. Marine protected areas and resilience to sedimentation in the Solomon Islands. Coral Reefs, 32, p: 61-69 Hamilton, R.J., Hughes, A., Brown, C.J., …	5	Flood and erosion protection Halpern: Where compliance with management is poor, and indirect stressors play a dominant role in determining ecosystem condition, as appears to be the case in Roviana Lagoon, MPAs may provide little management benefit. Hamilton et al: The probable causes of these declines are sustained fishing pressure, poor enforcement of community-based management measures and loss…
15	Life on land	Outcome	15.06	Promote fair and equitable sharing of the benefits arising from the utilization of genetic resources and promote appropriate access to such resources, as internationally agreed	0
15	Life on land	Outcome	15.07	Take urgent action to end poaching and trafficking of protected species of flora and fauna and address both demand and supply of illegal wildlife products	2	Teh, L.C.L., Teh, L.S.L and Chung, F.C. 2007. A private management approach to coral reef conservation in Sabah, Malaysia. Biodiversity and Conservation, 17, p. 3061-3077. Weekers, D.P. and Zahnow, R. 2018. Risky facilities: Analysis of illegal recreational fishing in the Great Barrier Reef Marine Park, Australia. Journal of Criminology, 52, p. 315-333. Thiault, L., Weekers, D., Curnock, M., Mars…	2	Teh: Conservation fees charged to visitors to Lankayan Island Dive Resort within the SIMCA have generated a sustainable source of financing to meet the majority of management costs for the conservation area, which is separately managed by a private organization called Reef Guardian. The availability of adequate funds has enabled Reef Guardian to invest in personnel training and surveillance techn…
15	Life on land	Outcome	15.08	By 2020, introduce measures to prevent the introduction and significantly reduce the impact of invasive alien species on land and water ecosystems and control or eradicate the priority species	2	Kellner, J.B. and Hastings, A. 2009. A reserve paradox: introduced heterogeneity may increase regional invasibility. Conservation Letters, 2, p. 115-122. Mannino, A.m., Parasporo, M., Crocetta, F. and Balistreri, P. 2016. An updated overview of the marine alien and cryptogenic species from the Egadi Islands Marine Protected Area (Italy). Marine Biodiversity, 47, p. 469-480.	2	Kellner: Higher abundances inside marine reserves may sustain regional populations through spillover of larvae, but this induced spatial heterogeneity can also have undesirable consequences. Displacing fishing effort into a smaller area may offset larval export from MPAs and locally reduce populations within fished areas by intensifying effort per area. Using a novel community perspective, we sho…
15	Life on land	Outcome	15.09	By 2020, integrate ecosystem and biodiversity values into national and local planning, development processes, poverty reduction strategies and accounts	2	Bergseth, B.J., Gurney, G.G., Barnes, M.L., Arias, A., Cinner, J.E. 2018. Addressing poaching in marine protected areas through voluntary surveillance and enforcement. Nature Sustainability, 1, p. 421-426. Vasquez-Lavin, F., Simon, J.W., Paz-Lerdon, X. 2013. Determining the Feasibility of Establishing New Multiple-Use Marine Protected Areas in Chile. AMBIO, 42, p. 997-1009. Zhao, Q., Stephenson, …	3	Bergseth et al: We also quantified how institutional design elements or conditions were related to how fishers responded to poaching, and highlight ways in which fishers can be engaged while mitigating risks. These include emphasizing how poaching personally affects each fisher, promoting stewardship and norms of personal responsibility and poverty alleviation to reduce the need for fishers to po…			there are probably more for this target but I stopped at three as I wonder if they are actually relevant afterall! I can scout for another couple if you want
15	Life on land	Means of Implementation	15.A	Mobilize and significantly increase financial resources from all sources to conserve and sustainably use biodiversity and ecosystems	2	Bohorquez, J.J., Dvarskas, A. and Pikitch, E.K. 2019. Filling the Data Gap – A Pressing Need for Advancing MPA Sustainable Finance. Frontiers in Marine Science, 6:45. doi: 10.3389/fmars.2019.00045. Dharmaratne, G.S., Sant, F.Y., Walling, L.J. 2000. Tourism potentials for financing protected areas. Annals of Tourism Research, 27, p. 590-610. Mallin, M-A. F., Stolz, D.C., Thompson, B.S., Berbesgaar…	4	Bohorquez et al: Reaching protected area (PA) coverage goals is challenged by a lack of sufficient financial resources. This funding gap is particularly pervasive for marine protected areas (MPAs). It has been suggested that marine conservationists examine examples from terrestrial protected areas (TPAs) for potential solutions to better fund MPAs. However, the funding needs for MPAs and TPAs hav…
15	Life on land	Means of Implementation	15.B	Mobilize significant resources from all sources and at all levels to finance sustainable forest management and provide adequate incentives to developing countries to advance such management, including for conservation and reforestation	0
15	Life on land	Means of Implementation	15.C	Enhance global support for efforts to combat poaching and trafficking of protected species, including by increasing the capacity of local communities to pursue sustainable livelihood opportunities	2	Jennings, S., Marshall, S.S., Polunin, N.V.C. 1996. Seychelles' marine protected areas: Comparative structure and status of reef fish communities. Biological Conservation, 75, p. 201-209. Attwood, C.G., Mann, B.Q., Beaumont, J. and Harris, J.M. 2010. Review of the state of marine protected areas in South Africa. South African Journal of Marine Science, 18, p. 341-367.	2	Jennings et al: We conclude that poaching and minor fishing concessions did not affect the aspects of the fish community which ave important to most tourist visitors (biomass and overall species richness), but that they have a statistically significant effect on the structure of the fish community. Furthermore, whilst a small well-patrolled area will provide an effective refuge from fishing, it w…
16	Peace, Justic and strong institutions	Outcome	16.01	Significantly reduce all forms of violence and related death rates everywhere	0
16	Peace, Justic and strong institutions	Outcome	16.02	End abuse, exploitation, trafficking and all forms of violence against and torture of children	0
16	Peace, Justic and strong institutions	Outcome	16.03	Promote the rule of law at the national and international levels and ensure equal access to justice for all	0
16	Peace, Justic and strong institutions	Outcome	16.04	By 2030, significantly reduce illicit financial and arms flows, strengthen the recovery and return of stolen assets and combat all forms of organized crime	0
16	Peace, Justic and strong institutions	Outcome	16.05	Substantially reduce corruption and bribery in all their forms	2	Robles-Zavala, E. 2014. Coastal livelihoods, poverty and well-being in Mexico. A case study of institutional and social constraints. Journal of Coastal Conservation, 18, p.431-448. Thomas, S. 2016. Between Tun Mustapha and the deep blue sea: the political ecology of blue carbon in Sabah. Environmental Science and Policy, 55, p. 20-35.	2	Robles-Zavala: The study concluded that poverty and marginalization in this fishing community is closely linked with institutional and social factors rather than to economics issues. The most severe constraints observed were corruption in the allocation of fishing licenses and permits, social exclusion and marginalization of new settlers and domestic violence associated with alcoholism and drug a…			these papers point to corruption as an issue as opposed to MPAs tackling corruption per se
16	Peace, Justic and strong institutions	Outcome	16.06	Develop effective, accountable and transparent institutions at all levels	2	McClanahan, T.R. and Abunge, C.A. 2015. Perceptions of fishing access restrictions and the disparity of benefits among stakeholder communities and nations of south-eastern Africa. Fish and Fisheries, 17, p. 417-437. Atmodjo, E., Lamers, M., and Mol, A. 2017. Financing marine conservation tourism: Governing entrance fees in Raja Ampat, Indonesia. Marine Policy, 78, p. 181-188. Catlin, J., Jones, T…	5	McClanahan and Abunge: Madagascar and Mozambique fishing villages had low between-community variability, and their responses did not reflect the hypothesized restriction gradient or strong social disparity, which may reflect limited practical experience with restrictions. These results suggest that countries with stronger central governments contained villages with more between-community variabil…			Doulman: not specific to MPAs but worth a scan
16	Peace, Justic and strong institutions	Outcome	16.07	Ensure responsive, inclusive, participatory and representative decision-making at all levels	1	Di Franco, A., Hogg, K.E., Calò, A., Bennett, N.J., Sévin-Allouet, M.A., Alaminos, O.E., Lang, M., Koutsoubas, D., Prvan, M., Santarossa, L. and Niccolini, F., 2020. Improving marine protected area governance through collaboration and co-production. Journal of Environmental Management, 269, p.110757. Gurney, G.G., Pressey, R.L., Cinner, J.E., Pollnac, R. and Campbell, S.J., 2015. Integrated conse…	6	Di Franco et al: Movement towards co-production: Employing good governance processes involving stakeholders may rapidly generate improved local support for conservation and provide insights for potential leverage points upon which to act to maximize perceived effectiveness and enhance support toward MPAs Gurney et al: Social inequity can create conflict and impede poverty reduction, thus jeopardi…	Blue text indicates a second opinion needed	I think the Gerhardinger refernce works. There seems to be little capacity for decent decision making: "Overall, management councils of marine and terrestrial protected areas in Brazil face a diversity of problems, such as financial shortages preventing regular meetings, lack of capacity to deliberate and a lack of capacity to effectively implement decisions."
16	Peace, Justic and strong institutions	Outcome	16.08	Broaden and strengthen the participation of developing countries in the institutions of global governance	2	Duda, A.M. 2016. Strengthening global governance of Large Marine Ecosystems by incorporating coastal management and Marine Protected Areas. Environmental Development, 17, p. 249-263. Laffoley, D., Baxter, J.M., Amon, D.j., Currie, D.E.J., Downs, C.A., Hall-Spencer, J.M., Harden-Davies, H., Page, R., Reid, C.P., Roberts, C.M., Rogers, A., Thiele, T., Sheppard, C.R.C., Sumaila, R.U., Woodall, L.C. …	4	Duda: After 20 years of programming GEF International Waters (IW) LME projects, it is time to assemble experiences and promote learning and capacity building among the projects in the LME portfolio. This review is focused on strengthening the multi-scale approach to LME governance by reviewing existing approaches and advocating the incorporation of Integrated Coastal Management (ICM) and Marine P…			These refs may be too tenuous…
16	Peace, Justic and strong institutions	Outcome	16.09	By 2030, provide legal identity for all, including birth registration	0
16	Peace, Justic and strong institutions	Outcome	16.1	Ensure public access to information and protect fundamental freedoms, in accordance with national legislation and international agreements	0
16	Peace, Justic and strong institutions	Means of Implementation	16.A	Strengthen relevant national institutions, including through international cooperation, for building capacity at all levels, in particular in developing countries, to prevent violence and combat terrorism and crime	0
16	Peace, Justic and strong institutions	Means of Implementation	16.B	Promote and enforce non-discriminatory laws and policies for sustainable development	0
	Partnerships for the goals	Outcome	17.01	Strengthen domestic resource mobilization, including through international support to developing countries, to improve domestic capacity for tax and other revenue collection	0
17	Partnerships for the goals	Outcome	17.02	Developed countries to implement fully their official development assistance commitments, including the commitment by many developed countries to achieve the target of 0.7 per cent of ODA/GNI to developing countries and 0.15 to 0.20 per cent of ODA/GNI to least developed countries ODA providers are encouraged to consider setting a target to provide at least 0.20 per cent of ODA/GNI to least devel…	0
17	Partnerships for the goals	Outcome	17.03	Mobilize additional financial resources for developing countries from multiple sources	0
17	Partnerships for the goals	Outcome	17.04	Assist developing countries in attaining long-term debt sustainability through coordinated policies aimed at fostering debt financing, debt relief and debt restructuring, as appropriate, and address the external debt of highly indebted poor countries to reduce debt distress	1	McGowan, J., Weary, R., Carriere, L., Game, E.T., Smith, J.L., Garvey, M. and Possingham, H.P., 2020. Prioritizing debt conversion opportunities for marine conservation. Conservation Biology, 34(5), pp.1065-1075. Techera, E.J. 2019. Protected Area Law in Seychelles: Legal Complexity in a Micro-jurisdiction. The International Journal of Marine and Coastal Law, https://doi.org/10.1163/15718085-2334…	7	McGowen et al: Incentivized debt conversion is a financing mechanism that can assist countries with a heavy debt burden to bolster their long-term domestic investment in nature conservation. Negotiated terms of the transaction will vary by country, and TNC’s objectives are to strengthen and expand marine protected area (MPA) policy commitments and support marine spatial planning processes that de…	Few papers discuss debt specifically so have used papers with emphasis on budget/economic/financial focus.	I think these references work as they highlight economic issues. It would be good if we could find a paper that talks about the negative aspects of debt swap (e.g., forcing a conservation agenda) but this field is relatively new with MPAs so I'm not sure such a paper exists. Maybe this one/ Silver, J.J. and Campbell, L.M., 2018. Conservation, development and the blue frontier: The Republic of Sey…	Looks good to me, I've "formatted it in"
17	Partnerships for the goals	Outcome	17.05	Adopt and implement investment promotion regimes for least developed countries	0
17	Partnerships for the goals	Outcome	17.06	Enhance North-South, South-South and triangular regional and international cooperation on and access to science, technology and innovation and enhance knowledge sharing on mutually agreed terms, including through improved coordination among existing mechanisms, in particular at the United Nations level, and through a global technology facilitation mechanism	0
17	Partnerships for the goals	Outcome	17.07	Promote the development, transfer, dissemination and diffusion of environmentally sound technologies to developing countries on favourable terms, including on concessional and preferential terms, as mutually agreed	0
17	Partnerships for the goals	Outcome	17.08	Fully operationalize the technology bank and science, technology and innovation capacity-building mechanism for least developed countries by 2017 and enhance the use of enabling technology, in particular information and communications technology	0
17	Partnerships for the goals	Outcome	17.09	Enhance international support for implementing effective and targeted capacity-building in developing countries to support national plans to implement all the sustainable development goals, including through North-South, South-South and triangular cooperation	0
17	Partnerships for the goals	Outcome	17.1	Promote a universal, rules-based, open, non-discriminatory and equitable multilateral trading system under the World Trade Organization, including through the conclusion of negotiations under its Doha Development Agenda	0
17	Partnerships for the goals	Outcome	17.11	Significantly increase the exports of developing countries, in particular with a view to doubling the least developed countries’ share of global exports by 2020	0
17	Partnerships for the goals	Outcome	17.12	Achieving high compliance with resource-use management policies is a critical concern to achieving sustainability, particularly in poor countries. Willingness to comply may depend on the values and perceptions of benefits and legitimacy of the restrictions. Consequently, we interviewed and evaluated the perceptions of fishing restrictions among similar to 2100 marine fisheries stakeholders (resou…	0
17	Partnerships for the goals	Outcome	17.13	Enhance global macroeconomic stability, including through policy coordination and policy coherence	0
17	Partnerships for the goals	Outcome	17.14	Enhance policy coherence for sustainable development	0
17	Partnerships for the goals	Outcome	17.15	Respect each country’s policy space and leadership to establish and implement policies for poverty eradication and sustainable development	0
17	Partnerships for the goals	Outcome	17.16	Enhance the global partnership for sustainable development, complemented by multi-stakeholder partnerships that mobilize and share knowledge, expertise, technology and financial resources, to support the achievement of the sustainable development goals in all countries, in particular developing countries	1	Di Franco, A., Hogg, K.E., Calò, A., Bennett, N.J., Sévin-Allouet, M.A., Alaminos, O.E., Lang, M., Koutsoubas, D., Prvan, M., Santarossa, L. and Niccolini, F., 2020. Improving marine protected area governance through collaboration and co-production. Journal of Environmental Management, 269, p.110757. Nelson, A., Johnson, G.L., Wenzel, L., Antoine, A., Avilla, L. and Manubag, M.L., 2019. Integrati…	6	Di Franco et al: Movement towards co-production: Employing good governance processes involving stakeholders may rapidly generate improved local support for conservation and provide insights for potential leverage points upon which to act to maximize perceived effectiveness and enhance support toward MPAs Nelson et al: Designing capacity‐building programmes at the network scale can contribute dire…		This ref looks good to me. An example of the mobalization of funds and technology	Moved Weeks to here - think this is the one you had in mind re: stakeholder engagement
17	Partnerships for the goals	Outcome	17.17	Encourage and promote effective public, public-private and civil society partnerships, building on the experience and resourcing strategies of partnerships	0			toward MPAs
17	Partnerships for the goals	Outcome	17.18	By 2020, enhance capacity-building support to developing countries, including for least developed countries and small island developing States, to increase significantly the availability of high-quality, timely and reliable data disaggregated by income, gender, age, race, ethnicity, migratory status, disability, geographic location and other characteristics relevant in national contexts	0
17	Partnerships for the goals	Outcome	17.19	By 2030, build on existing initiatives to develop measurements of progress on sustainable development that complement gross domestic product, and support statistical capacity-building in developing countries	0

## Sheet: Sheet1
Goal	Goal title	Target type	Target #	Could MPAs influence the target?
1	No Poverty	Outcome	1.01	1		Count of Could MPAs influence the target?		Could MPAs influence the target?
1	No Poverty	Outcome	1.02	1		Goal	Goal title	0	Grand Total			SDG	No	Yes	Total	Proportion
1	No Poverty	Outcome	1.03	0			Partnerships for the goals	1	1			1	3	4	7	0.571429
1	No Poverty	Outcome	1.04	1		Total		1	1			2	5	3	8	0.375
1	No Poverty	Outcome	1.05	1		Grand Total		1	1			3	11	2	13	0.153846
1	No Poverty	Means of Implementation	1.A	0								4	8	2	10	0.2
1	No Poverty	Means of Implementation	1.B	0								5	6	3	9	0.333333
2	Zero hunger	Outcome	2.01	1								6	6	2	8	0.25
2	Zero hunger	Outcome	2.02	0								7	4	1	5	0.2
2	Zero hunger	Outcome	2.03	1								8	7	5	12	0.416667
2	Zero hunger	Outcome	2.04	1								9	5	3	8	0.375
2	Zero hunger	Outcome	2.05	0								10	6	4	10	0.4
2	Zero hunger	Means of Implementation	2.A	0								11	5	5	10	0.5
2	Zero hunger	Means of Implementation	2.B	0								12	6	5	11	0.454545
2	Zero hunger	Means of Implementation	2.C	0								13	3	2	5	0.4
3	Good health and well-being	Outcome	3.01	0								14	4	6	10	0.6
3	Good health and well-being	Outcome	3.02	1								15	6	6	12	0.5
3	Good health and well-being	Outcome	3.03	0								16	8	4	12	0.333333
3	Good health and well-being	Outcome	3.04	1								17	16	2	18	0.111111
3	Good health and well-being	Outcome	3.05	0								TOTAL	109	59	168	0.35119
3	Good health and well-being	Outcome	3.06	0
3	Good health and well-being	Outcome	3.07	0
3	Good health and well-being	Outcome	3.08	0
3	Good health and well-being	Outcome	3.09	0
3	Good health and well-being	Means of Implementation	3.A	0
3	Good health and well-being	Means of Implementation	3.B	0
3	Good health and well-being	Means of Implementation	3.C	0
3	Good health and well-being	Means of Implementation	3.D	0
4	Quality education	Outcome	4.01	0
4	Quality education	Outcome	4.02	0
4	Quality education	Outcome	4.03	0
4	Quality education	Outcome	4.04	1
4	Quality education	Outcome	4.05	0
4	Quality education	Outcome	4.06	0
4	Quality education	Outcome	4.07	1
4	Quality education	Means of Implementation	4.A	0
4	Quality education	Means of Implementation	4.B	0
4	Quality education	Means of Implementation	4.C	0
5	Gender equality	Outcome	5.01	1
5	Gender equality	Outcome	5.02	0
5	Gender equality	Outcome	5.03	0
5	Gender equality	Outcome	5.04	0
5	Gender equality	Outcome	5.05	1
5	Gender equality	Outcome	5.06	0
5	Gender equality	Means of Implementation	5.A	2
5	Gender equality	Means of Implementation	5.B	0
5	Gender equality	Means of Implementation	5.C	0
6	Clean water and sanitation	Outcome	6.01	0
6	Clean water and sanitation	Outcome	6.02	0
6	Clean water and sanitation	Outcome	6.03	1
6	Clean water and sanitation	Outcome	6.04	0
6	Clean water and sanitation	Outcome	6.05	0
6	Clean water and sanitation	Outcome	6.06	1
6	Clean water and sanitation	Means of Implementation	6.A	0
6	Clean water and sanitation	Means of Implementation	6.B	0
7	Affordable and clean energy	Outcome	7.01	0
7	Affordable and clean energy	Outcome	7.02	0
7	Affordable and clean energy	Outcome	7.03	0
7	Affordable and clean energy	Means of Implementation	7.A	0
7	Affordable and clean energy	Means of Implementation	7.B	1
8	Decent work and economic growth	Outcome	8.01	1
8	Decent work and economic growth	Outcome	8.02	1
8	Decent work and economic growth	Outcome	8.03	0
8	Decent work and economic growth	Outcome	8.04	1
8	Decent work and economic growth	Outcome	8.05	1
8	Decent work and economic growth	Outcome	8.06	0
8	Decent work and economic growth	Outcome	8.07	0
8	Decent work and economic growth	Outcome	8.08	0
8	Decent work and economic growth	Outcome	8.09	1
8	Decent work and economic growth	Outcome	8.1	0
8	Decent work and economic growth	Means of Implementation	8.A	0
8	Decent work and economic growth	Means of Implementation	8.B	0
9	Industries, innovation and infrastructure	Outcome	9.01	1
9	Industries, innovation and infrastructure	Outcome	9.02	0
9	Industries, innovation and infrastructure	Outcome	9.03	0
9	Industries, innovation and infrastructure	Outcome	9.04	0
9	Industries, innovation and infrastructure	Outcome	9.05	1
9	Industries, innovation and infrastructure	Means of Implementation	9.A	1
9	Industries, innovation and infrastructure	Means of Implementation	9.B	0
9	Industries, innovation and infrastructure	Means of Implementation	9.C	0
10	Reduced inequalities	Outcome	10.01	1
10	Reduced inequalities	Outcome	10.02	1
10	Reduced inequalities	Outcome	10.03	1
10	Reduced inequalities	Outcome	10.04	0
10	Reduced inequalities	Outcome	10.05	0
10	Reduced inequalities	Outcome	10.06	1
10	Reduced inequalities	Outcome	10.07	0
10	Reduced inequalities	Means of Implementation	10.A	0
10	Reduced inequalities	Means of Implementation	10.B	0
10	Reduced inequalities	Means of Implementation	10.C	0
11	Sustainable cities and communities	Outcome	11.01	1
11	Sustainable cities and communities	Outcome	11.02	0
11	Sustainable cities and communities	Outcome	11.03	0
11	Sustainable cities and communities	Outcome	11.04	1
11	Sustainable cities and communities	Outcome	11.05	1
11	Sustainable cities and communities	Outcome	11.06	0
11	Sustainable cities and communities	Outcome	11.07	1
11	Sustainable cities and communities	Means of Implementation	11.A	0
11	Sustainable cities and communities	Means of Implementation	11.B	1
11	Sustainable cities and communities	Means of Implementation	11.C	0
12	Responsible consumption and production	Outcome	12.01	0
12	Responsible consumption and production	Outcome	12.02	1
12	Responsible consumption and production	Outcome	12.03	0
12	Responsible consumption and production	Outcome	12.04	1
12	Responsible consumption and production	Outcome	12.05	0
12	Responsible consumption and production	Outcome	12.06	0
12	Responsible consumption and production	Outcome	12.07	0
12	Responsible consumption and production	Outcome	12.08	1
12	Responsible consumption and production	Means of Implementation	12.A	1
12	Responsible consumption and production	Means of Implementation	12.B	1
12	Responsible consumption and production	Means of Implementation	12.C	0
13	Climate action	Outcome	13.01	1
13	Climate action	Outcome	13.02	0
13	Climate action	Outcome	13.03	1
13	Climate action	Means of Implementation	13.A	0
13	Climate action	Means of Implementation	13.B	0
14	Life below water	Outcome	14.01	1
14	Life below water	Outcome	14.02	1
14	Life below water	Outcome	14.03	0
14	Life below water	Outcome	14.04	1
14	Life below water	Outcome	14.05	1
14	Life below water	Outcome	14.06	0
14	Life below water	Outcome	14.07	1
14	Life below water	Means of Implementation	14.A	0
14	Life below water	Means of Implementation	14.B	1
14	Life below water	Means of Implementation	14.C	0
15	Life on land	Outcome	15.01	0
15	Life on land	Outcome	15.02	0
15	Life on land	Outcome	15.03	0
15	Life on land	Outcome	15.04	0
15	Life on land	Outcome	15.05	1
15	Life on land	Outcome	15.06	0
15	Life on land	Outcome	15.07	2
15	Life on land	Outcome	15.08	2
15	Life on land	Outcome	15.09	2
15	Life on land	Means of Implementation	15.A	2
15	Life on land	Means of Implementation	15.B	0
15	Life on land	Means of Implementation	15.C	2
16	Peace, Justic and strong institutions	Outcome	16.01	0
16	Peace, Justic and strong institutions	Outcome	16.02	0
16	Peace, Justic and strong institutions	Outcome	16.03	0
16	Peace, Justic and strong institutions	Outcome	16.04	0
16	Peace, Justic and strong institutions	Outcome	16.05	2
16	Peace, Justic and strong institutions	Outcome	16.06	2
16	Peace, Justic and strong institutions	Outcome	16.07	1
16	Peace, Justic and strong institutions	Outcome	16.08	2
16	Peace, Justic and strong institutions	Outcome	16.09	0
16	Peace, Justic and strong institutions	Outcome	16.1	0
16	Peace, Justic and strong institutions	Means of Implementation	16.A	0
16	Peace, Justic and strong institutions	Means of Implementation	16.B	0
	Partnerships for the goals	Outcome	17.01	0
17	Partnerships for the goals	Outcome	17.02	0
17	Partnerships for the goals	Outcome	17.03	0
17	Partnerships for the goals	Outcome	17.04	1
17	Partnerships for the goals	Outcome	17.05	0
17	Partnerships for the goals	Outcome	17.06	0
17	Partnerships for the goals	Outcome	17.07	0
17	Partnerships for the goals	Outcome	17.08	0
17	Partnerships for the goals	Outcome	17.09	0
17	Partnerships for the goals	Outcome	17.1	0
17	Partnerships for the goals	Outcome	17.11	0
17	Partnerships for the goals	Outcome	17.12	0
17	Partnerships for the goals	Outcome	17.13	0
17	Partnerships for the goals	Outcome	17.14	0
17	Partnerships for the goals	Outcome	17.15	0
17	Partnerships for the goals	Outcome	17.16	1
17	Partnerships for the goals	Outcome	17.17	0
17	Partnerships for the goals	Outcome	17.18	0
17	Partnerships for the goals	Outcome	17.19	0

## Sheet: wordsearches for NO targets
Goal	Goal title	Target type	Target #	Target description	Word search	result
2	Zero hunger	Outcome	2.02	By 2030, end all forms of malnutrition, including achieving, by 2025, the internationally agreed targets on stunting and wasting in children under 5 years of age, and address the nutritional needs of adolescent girls, pregnant and lactating women and older persons.	malnutrition adolescent pregnant lactating	Failed to find any
5	Gender equality	Means of Implementation	5.A	Undertake reforms to give women equal rights to economic resources, as well as access to ownership and control over land and other forms of property, financial services, inheritance and natural resources, in accordance with national laws	reforms Trawlled the entire Gender equality list.	Found 2
15	Life on land	Outcome	15.07	Take urgent action to end poaching and trafficking of protected species of flora and fauna and address both demand and supply of illegal wildlife products	poaching	Found 3
15	Life on land	Outcome	15.08	By 2020, introduce measures to prevent the introduction and significantly reduce the impact of invasive alien species on land and water ecosystems and control or eradicate the priority species	invasive alien	Found 2
15	Life on land	Outcome	15.09	By 2020, integrate ecosystem and biodiversity values into national and local planning, development processes, poverty reduction strategies and accounts	Poverty (inside Life on Land section only) National planning	found 2 and 1 respectively
15	Life on land	Means of Implementation	15.A	Mobilize and significantly increase financial resources from all sources to conserve and sustainably use biodiversity and ecosystems	financial	found 4
16	Peace, Justic and strong institutions	Outcome	16.05	Substantially reduce corruption and bribery in all their forms	Corruption Bribery	Found 2 under corruption
16	Peace, Justic and strong institutions	Outcome	16.06	Develop effective, accountable and transparent institutions at all levels	transparent
16	Peace, Justic and strong institutions	Outcome	16.08	Broaden and strengthen the participation of developing countries in the institutions of global governance	global governance
16	Peace, Justic and strong institutions	Means of Implementation	16.B	Promote and enforce non-discriminatory laws and policies for sustainable development	non-discriminatory discrimination
