# Supplementary material for: Area Based Conservation Tools Have Mixed Effects Across All SDGs but Research May Overstate Effects
Source: Research Square preprint supplement (doi:10.21203/rs.3.rs-6556547/v1), 2025-05-26
Supplement: Supplementary file 4 [file d8f14612d531615f8697a572.xlsx]

## Sheet: SDG 1
Ref Number	Reference	Paper Year	SDG	Study type	Evidence type	Evidence type 2	Quote	Positive or negative influence	Geographical location	Study cover	Initial link to SDG target	Data: Primary or secondary use	Direct impact/Indirect impact	Assumed impact/Observed impact	actual MPA/Hypothetical MPA	Data source	MPA name	MPA size	Ecosystem	MPA age	Multiple Zones (Y or N)	MPA notake	Enforced (Y or N)	Governance
1	Diz, D., Johnson, D., Riddell, M., Rees, S., Battle, J., Gjerde, K., Hennige, S., & Roberts, J. M. (2018). Mainstreaming marine biodiversity into the SDGs: The role of other effective area-based conservation measures (SDG 14.5). Marine Policy, 93(August 2017), 251–261. https://doi.org/10.1016/j.marpol.2017.08.019	2018	1	Report	Project review	Overview	﻿To help communities overcome the short-term opportunity costs, the project is supporting communities to establish savings groups and supporting small-medium enterprises. Village Savings and Loans Asso- ciations (VSLAs) have been established in all communities. These are savings groups that allow men and women not only to save cash col- laboratively, take out loans for small enterprises, and acce…	Positive	Mozambique	Multi-site	NA- narrative paper	Secondary	Direct	Observed		Our Sea Our Life' internal project files
3	Cárcamo, P. F., & Gaymer, C. F. (2013). Interactions between spatially explicit conservation and management measures: Implications for the governance of marine protected areas. Environmental Management, 52(6), 1355–1368. https://doi.org/10.1007/s00267-013-0167-9	2013	1	Original research	Qualitative	Interviews	﻿﻿Negative perceptions about the implementation of marine reserve (3): ‘‘Now, with the marine reserve, the only beneficiaries are the Punta de Choros fishermen’s association. They are the only ones who obtain economical benefits from tourism, not even those from Los Choros fishermen’s association’’ (Leader 2 from southern La Higuera)	Negative	Chile	Single-site	Results	Primary	Indirect	Observed	Actual	Semi-structured interviews with six fishing leaders belonging to fishermen's organizations that have historically fished in the study area	﻿Islas Choros-Damas Marine Reserve	28.34	Temperate	7 years officially, 1 year since effective implementation/permit			N	Top down
5	Tobey, J., & Torell, E. (2006). Coastal poverty and MPA management in mainland Tanzania and Zanzibar. Ocean and Coastal Management, 49(11), 834–854. https://doi.org/10.1016/j.ocecoaman.2006.08.002	2006	1	Original research	Qualitative	Surveys and focus groups	﻿When comparing project and control villages, the only significant, positive changes were detected in the Zanzibar (Menai and Chwaka Bay) and Mafia Island sites (Table 8). These improvements consisted in increased availability of protected water sources (in the Unguja sites); membership in environmental groups, perceived fish catches and perceived state of local economy (for Menai Bay)	Both	Tanzania	Multi-site	Results	Primary	Both	Observed	Actual	Household surveys
							﻿Negligible and negative mean impact on economic wellbeing in Misali and Mafia (Jibondo village again an outlier with higher negative perceptions)
6	De Groot, J., & Bush, S. R. (2010). The potential for dive tourism led entrepreneurial marine protected areas in Curacao. Marine Policy, 34(5), 1051–1059. https://doi.org/10.1016/j.marpol.2010.03.004	2010	1				no evidence	Cautious
8	Anderson, R. B. (2019). Beyond “Success”: Community, governance, and the future of Cabo Pulmo National Park. Human Organization, 78(2), 147–157. https://doi.org/10.17730/0018-7259.78.2.147	2019	1	Original research	Qualitative	Interviews	﻿The park has also generated economic benefits for local residents, from eco-tourism and dive businesses to restaurants and other tourism-related services	Positive	Mexico	Single-site	NA- narrative paper	Secondary	Indirect	Assumed	Actual	﻿Martínez de la Torre, J. Antonio 2008 Desarrollo local y el estado de la economía base en Cabo Pulmo. In Turismo y sustentabilidad en Cabo Pulmo, Baja California Sur. Alba E. Gámez, ed. Pp. 133-162. San Diego, CA: San Diego University.	Cabo Pulmo National Park	71.11	Sub tropical	23	Y	0.35 changed to 1 (in 2011?)	N
9	Takasaki, Y. (2016). Learning from disaster: Community-based marine protected areas in Fiji. Environment and Development Economics, 21(1), 53–77. https://doi.org/10.1017/S1355770X15000108	2016	1	Original research	Quantitative	Surveys	﻿Controlling for the endogeneity of household-level cyclone damage, as well as community heterogeneity, the analysis revealed that a household’s exposure to the disaster increased its support for establishing MPAs, presumably for future safety nets.	Positive	Fiji	Multi-site	Conclusion	Primary	Indirect	Assumed	Hypothetical	Household surveys
11	Cinner, J., Fuentes, M. M. P. B., & Randriamahazo, H. (2009). Exploring social resilience in Madagascar’s marine protected areas. Ecology and Society, 14(1). https://doi.org/10.5751/ES-02881-140141	2009	1				no evidence	Supportive
14	Long, S., Thurlow, G., Jones, P. J. S., Turner, A., Randrianantenaina, S. M., Gammage, T., Savage, J., & Ndriamanja, J. R. (2021). Critical analysis of the governance of the Sainte Luce Locally Managed Marine Area (LMMA), southeast Madagascar. Marine Policy, 127(August 2019), 103691. https://doi.org/10.1016/j.marpol.2019.103691	2021	1	Original research	Mixed methods	Interviews and surveys	﻿There is limited agricultural potential. ‘Volun-tourism’ offers some limited opportunities. SEED’s ‘Stitch’ livelihood project has trained women in embroidery and generated 37 million MGA (~US$ 11,400) in revenue in the six months from October 2017 to March 2018 [54]. Seasonal fishing for tuna and sardines provides income and nutrition. A lack of ice facilities and other infrastructure means the…	Both	Madagascar	Single-site	NA- narrative paper	Both	Both	Observed	Actual	﻿Primary data was collected through interviews. Secondary data was obtained from relevant scientific and grey literature	Sainte Luce Locally Managed Marine Area	160	Tropical	7	Y	0.08125	N	Community based
							﻿Committee members want compensation for patrolling the NTZ, to offset income lost whilst not fishing.
15	Cannot find full paper - could contact rebecca.sheppard@dpi.qld.gov.au
17	de Andrade, A. B., & de Oliveira Soares, M. (2017). Offshore marine protected areas: Divergent perceptions of divers and artisanal fishers. Marine Policy, 76, 107–113. https://doi.org/10.1016/j.marpol.2016.11.016	2017	1	Original research	Mixed methods	Interviews and surveys	﻿Studies corroborate the opinions of divers and fishers about the ecosystem services of the MPA, citing business opportunities, as well as income and work in the areas of influence: subsistence fishing, professional and recreational diving activities, the economy, and leisure	Positive	Brazil offshore	Single-site	Results and Discussion'	Both	Direct	Observed	Actual	Primary data through interviews, secondary through literature	﻿Parque Estadual Marinho da Pedra da Risca do Meio	33.2	Tropical	19	N	1	N	Top down
19	Grilo, C., Chircop, A., & Guerreiro, J. (2012). Prospects for transboundary marine protected areas in East Africa. Ocean Development and International Law, 43(3), 243–266. https://doi.org/10.1080/00908320.2012.672297	2012	1	Review	Project review	Overview	﻿However, dynamite fishing is resurging, a comeback explained by its high profitability.72 In the face of depletion of local fish stocks, it is an attractive activity for dispossessed youth to quickly improve their economic situation.73 The resurgence of dynamite fishing is further compounded by the previous tense relationship between fishery and park authorities. A gear exchange program offered …	Both	Tanzania, Mozambique and South Africa	Multi-site	NA- narrative paper	Secondary	Both	Assumed	Actual	Various grey and published literature
							The MPA has had a positive impact on the condition of the coral reefs and there is anecdotal evidence of improved catches.
29	Gerhardinger, L. C., Godoy, E. A. S., Jones, P. J. S., Sales, G., & Ferreira, B. P. (2011). Marine protected dramas: The flaws of the Brazilian national system of marine protected areas. Environmental Management, 47(4), 630–643. https://doi.org/10.1007/s00267-010-9554-7	2011	1				no evidence	Unclear
31	Robles-Zavala, E. (2014). Coastal livelihoods, poverty and well-being in Mexico. A case study of institutional and social constraints. Journal of Coastal Conservation, 18(4), 431–448. https://doi.org/10.1007/s11852-014-0329-9	2014	1				no evidence	Supportive
32	Weeks, R. (2017). Incorporating seascape connectivity in conservation prioritisation. PLoS ONE, 12(7), 1–16. https://doi.org/10.1371/journal.pone.0182396	2017	1				no evidence	Supportive
33	Benards, O., & Hempel, G. (2013). Case studies of changes in the structure of reef lagoon fisheries off southern Kenya. Ecotropica, 19(1–2), 59–72.	2013	1	Original research	Mixed methods	Interview and biological surveys	﻿The introduction of tourism in the MPA led to several physical facilities, including guest rooms, engine boats to ferry visitors to fishing grounds, ca- tering facilities. Those provisions meant additional income for the fishers and community of Kuruwitu	Both	Kenya	Multi-site	Results	Primary	Both	Observed	Actual	Interviews with fishermen
							﻿On the other hand tourism causes ownership conflicts at the beaches which had previously been the common property of the fishers.				Conclusion
34	Rife, A. N., Erisman, B., Sanchez, A., & Aburto-Oropeza, O. (2013). When good intentions are not enough...Insights on networks of “paper park” marine protected areas. Conservation Letters, 6(3), 200–212. https://doi.org/10.1111/j.1755-263X.2012.00303.x	2013	1	Report/review	Project review	Overview	﻿Nevertheless, we find that MPAs have generally been unsuccessful in meeting ei- ther their fisheries or conservation objectives. We eval- uate MPA success from this interdisciplinary perspec- tive, which encompasses biological and socioeconomic advancements (Pollnac et al. 2001; Christie 2004). Bio- logical success is measured by the recovery of the ecosys- tem (e.g. increased abundance and aver…	Negative	Mexico	Multi-site	NA- narrative paper	Secondary	Direct	Assumed	Actual	Various grey and published literature
35	Benards, O., & Hempel, G. (2013). Case studies of changes in the structure of reef lagoon fisheries off southern Kenya. Ecotropica, 19(1–2), 59–72.	2013	1	Report/review	Project review	Overview	﻿Many Pamana MPA members have experienced increased food, health, and economic security for their communities, as predicted by Hatcher and Hatcher (2004)	Positive	Phillipines	Multi-site	NA- narrative paper	Secondary	Direct	Observed	Actual	Various grey and published literature
36	Bergseth, B. J., Gurney, G. G., Barnes, M. L., Arias, A., & Cinner, J. E. (2018). Addressing poaching in marine protected areas through voluntary surveillance and enforcement. Nature Sustainability, 1(8), 421–426. https://doi.org/10.1038/s41893-018-0117-x	2018	1				no evidence	Cautious
37	Ward, M., Possingham, H., Rhodes, J. R., & Mumby, P. (2018). Food, money and lobsters: Valuing ecosystem services to align environmental management with Sustainable Development Goals. Ecosystem Services, 29, 56–69. https://doi.org/10.1016/j.ecoser.2017.10.023	2018	1	Original research	Quantitative	Model	﻿In this study, the BAU scenario yields the highest initial economic return and the highest ROI, however the trade-offs include a possible 50 per cent decrease of spawners and 6 times less available lobster-derived protein to the local communities. This could have many knock-on consequences such as increased poaching, further undernourishment and worsening poverty. H	Both	South Africa	Single-site	Discussion	Secondary	Direct	Assumed	Actual	Future scenario modelling - ﻿This calculation allowed us to approximate the available lobster-derived protein to local community and overseas/affluent communities, using the quantities generated by the InVEST model for each scenario.	Table Mountain National Park Marine Protected Area.	1000	Sub tropical	13	Y	Y	Y	Top down
							﻿However according to our data, if large-scale fisheries are excluded from harvesting lobster within the Marine Protected Area, by 2115 the West Coast Rock Lobster fishery can potentially yield 50 per cent more economic value than the BAU scenario, while also inducing the highest available protein to local communities and the highest economic spend on nutrition by local communities, both of which…
38	Chircop, A., Francis, J., van der Elst, R., Pacule, H., Guerreiro, J., Grilo, C., & Carneiro, G. (2010). Governance of marine protected areas in east africa: A comparative study of mozambique, South Africa, and Tanzania. Ocean Development and International Law, 41(1), 1–33. https://doi.org/10.1080/00908320903285398	2010	1				no evidence	Cautious
39	Full text only available in french
41	Hilborn, R., Punt, A. E., & Orensanz, J. (2004). Beyond band-aids in fisheries management: Fixing world fisheries. Bulletin of Marine Science, 74(3), 493–507.	2004	1				no evidence	Unclear
44	Moreno-Sánchez, R. D. P., & Maldonado, J. H. (2013). Adaptive capacity of fishing communities at marine protected areas: A case study from the colombian pacific. Ambio, 42(8), 985–996. https://doi.org/10.1007/s13280-013-0454-y	2013	1				no evidence	Cautious
45	Edwards, S. (2008). Ocean zoning, first possession and Coasean contracts. Marine Policy, 32(1), 46–54. https://doi.org/10.1016/j.marpol.2007.04.005	2008	1				no evidence	Cautious
46	Ferrer, A. J. G., Garces, L., Perez, M., & Pomeroy, R. (2018). Inter-local bay alliances in Northern Mindanao, Philippines: Experiences and lessons learned in establishment and organisational sustainability. Marine Policy, 94(May), 81–88. https://doi.org/10.1016/j.marpol.2018.05.001	2018	1				no evidence	Cautious
51	Cesar, H. (1996). Economic Analysis of Indonesian Coral Reefs. Environmentally Sustainable Development Vice Presidency, December, 108.	1996	1	Review	Literature review	Overview	﻿This would mean a present value of direct total net benefit of around US$ 500,000 per km of coastline. With the tourism-multiplier of 2, this gives a net present value of US$ 1 million per km of coastline. This number is even much higher in Bali and in Manado, which currently derives tens of millions per year from marine tourism, much of it from visitors to the Bunaken Marine Park	Positive	Indonesia	Multi-site	NA- narrative paper	Secondary	Indirect	Observed	Actual	Various grey and published literature
52	Vásquez-Lavín, F., Simon, J. W., & Paz-Lerdón, X. (2013). Determining the feasibility of establishing new multiple-use marine protected areas in Chile. Ambio, 42(8), 997–1009. https://doi.org/10.1007/s13280-013-0455-x	2013	1	Original research	Mixed methods	Interviews, surveys, focus group workshops	Economic feasibility - low to medium	Negative	Chile	Multi-site	Results	Both	Direct	Assumed	Hypothetical	Field work through interviews, focus groups, discussion, and presentation of the initiatives with stakeholders
53	Cinner, J. E. (2009). Poverty and the use of destructive fishing gear near east African marine protected areas. Environmental Conservation, 36(4), 321–326. https://doi.org/10.1017/S0376892910000123	2009	1				no evidence? Looking at use of destructive fishing gear near MPAs - no conclusion drawn about impact of MPAs	Unclear
54	Stewart, B. D., Howarth, L. M., Wood, H., Whiteside, K., Carney, W., Crimmins, É., O’Leary, B. C., Hawkins, J. P., & Roberts, C. M. (2020). Marine Conservation Begins at Home: How a Local Community and Protection of a Small Bay Sent Waves of Change Around the UK and Beyond. Frontiers in Marine Science, 7(February), 1–14. https://doi.org/10.3389/fmars.2020.00076	2020	1	Report	Project review	Overview	﻿Overall, these findings indicate that the NTZ is protecting scallops from fishing mortality, allowing them to become more numerous, larger, older, and more fecund. This should mean the NTZ is contributing disproportionally to recruitment by exporting large amounts of eggs and larvae to surrounding areas	Positive	Scotland	Single-site	NA- narrative paper	Secondary	Indirect	Observed	Actual	Grey literature and data from annual monitoring program	Lamash Bay No Take Zone	2.6	Temperate	11	N	1	Y	Bottom up
																	﻿South Arran Nature Conservation MPA	250	Temperate	5	Y	0.01	Y	Top down
55	Halpern, B. S., Selkoe, K. A., White, C., Albert, S., Aswani, S., & Lauer, M. (2013). Marine protected areas and resilience to sedimentation in the Solomon Islands. Coral Reefs, 32(1), 61–69. https://doi.org/10.1007/s00338-012-0981-1	2013	1	Original research	Quantitative	Model	﻿We found little evidence that MPAs decrease impact or improve conditions and instead found some potential declines in fish abundance	Negative	Solomon Islands	Multi-site	Abstract	Primary	Indirect	Observed	Actual	Biological surveying of fish communities and testing ocean water quality. ANOVA andt test statistical analysis
56	Prince, J., & Hordyk, A. (2019). What to do when you have almost nothing: A simple quantitative prescription for managing extremely data-poor fisheries. Fish and Fisheries, 20(2), 224–238. https://doi.org/10.1111/faf.12335	2019	1				No evidence found - remove from sample?	Supportive
63	Aldon, M. E. T., Fermin, A. C., & Agbayani, R. F. (2011). Socio-cultural context of fishers’ participation in coastal resources management in Anini-y, Antique in west central Philippines. Fisheries Research, 107(1–3), 112–121. https://doi.org/10.1016/j.fishres.2010.10.014	2011	1	Original research	Mixed methods	Interviews and surveys	﻿The fishers had a generally positive perception about the abalone sea-ranching project, saying it would help provide addi- tional income for fisher	Positive	Phillipines	Single-site	Results	Primary	Direct	Assumed	Actual	﻿Data were collected from a household survey using a semi-structured questionnaire, focus group discussions and in-depth interviews with key informants.	﻿Nogas Island marine protected area	?	Tropical	16
65	Raycraft, J. (2019). Conserving Poverty: Destructive Fishing Gear Use in a Tanzanian Marine Protected Area. Conservation and Society, 17(3), 297–309. https://doi.org/10.4103/cs.cs_18_53	2019	1				no evidence	Cautious
66	Fauzi, A., & Anggraini Buchary, E. (2002). A socioeconomic perspective of environmental degradation at Kepulauan Seribu Marine National Park, Indonesia. Coastal Management, 30(2), 167–181. https://doi.org/10.1080/089207502753504698	2002	1				no evidence	Unclear
69	Humphreys, J., & Herbert, R. J. H. (2018). Marine protected areas: Science, policy & management. Estuarine, Coastal and Shelf Science, 215(October), 215–218. https://doi.org/10.1016/j.ecss.2018.10.014	2018	1				no evidence	Cautious
78	Moshy, V. H., Bryceson, I., & Mwaipopo, R. (2015). Social-ecological Changes, Livelihoods and Resilience among Fishing Communities in Mafia Island Marine Park, Tanzania. Forum for Development Studies, 42(3), 529–553. https://doi.org/10.1080/08039410.2015.1065906	2015	1	Original research	Mixed methods	Interviews and surveys	﻿Although park authorities are urged to ensure that the needs ofresource-dependent communities are met(Marshall et al. 2009), the real chal- lenges of day-to-day life within the MIMP have resulted in increased hardship and poverty.	Negative	Tanzania	Single-site	Results and Discussion'	Both	Direct	Observed	Actual	﻿Data were collected through in-depth interviews, focus group discussions, direct observation and questionnaire surveys. Interviewees	Mafia Island Marine Park	822	Tropical	19	Y		Y	Top down
82	Bunce, M., Brown, K., & Rosendo, S. (2010). Policy misfits, climate change and cross-scale vulnerability in coastal Africa: how development projects undermine resilience. Environmental Science and Policy, 13(6), 485–497. https://doi.org/10.1016/j.envsci.2010.06.003	2010	1	Original research	Mixed methods	Interviews and surveys	﻿Before the park we could catch 3–4 tonnes of fish a day, now it is 1–2 tonnes. We were promised a lot of things but we refused to be in the park. The contracts trick people – village leaders are just told to sign their names	Negative	Tanzania, Mozambique	Multi-site	NA- narrative paper	Both	Direct	Observed	Actual	﻿Key informant and household interviews, focus groups, and constructed mental models.
83	Cannot find full paper
84	Lam, M. (1998). Consideration of customary marine tenure system in the establishment of marine protected areas in the South Pacific. Ocean and Coastal Management, 39(1–2), 97–104. https://doi.org/10.1016/S0964-5691(98)00017-9	1998	1				no evidence	Supportive
86	D’agata, S., Darling, E. S., Gurney, G. G., McClanahan, T. R., Muthiga, N. A., Rabearisoa, A., & Maina, J. M. (2020). Multiscale determinants of social adaptive capacity in small-scale fishing communities. Environmental Science and Policy, 108(March), 56–66. https://doi.org/10.1016/j.envsci.2020.03.006	2020	1				no evidence	Unclear
88	Rosendo, S., Brown, K., Joubert, A., Jiddawi, N., & Mechisso, M. (2011). A clash of values and approaches: A case study of marine protected area planning in Mozambique. Ocean and Coastal Management, 54(1), 55–65. https://doi.org/10.1016/j.ocecoaman.2010.10.009	2011	1	Original research	Mixed methods	Interviews, surveys, focus group workshops	﻿In general, the policy documents dealing with tourism and poverty alleviation in Mozambique are largely positive with regards to the impacts of conservation on local communities. The	Both	Mozambique	Multi-site	Methods and Results	Both	Indirect	Assumed	Both	Reviewing policy documents, carrying out interviews, household surveys and focus group workshops
							﻿However, workshop participants were worried about the long-term impacts of losing control over such a large part of their land. They recognised that tourism is beneficial, but noted that it will not provide employment for everyone, and many people will continue to rely on shifting agriculture, fishing, hunting and harvesting wild plants and fruits
99	Mizrahi, M., Diedrich, A., Weeks, R., & Pressey, R. L. (2019). A Systematic Review of the Socioeconomic Factors that Influence How Marine Protected Areas Impact on Ecosystems and Livelihoods. Society and Natural Resources, 32(1), 4–20. https://doi.org/10.1080/08941920.2018.1489568	2019	1	Original research	Literature review	Meta-analysis	Figure.1	Both	Global	Multi-site	Results	Secondary	Both	Observed	Both	Systematic review of current literature and evidence for impact score evaluation
101	Cannot find full paper
105	Unsworth, R. K. F., Hinder, S. L., Bodger, O. G., & Cullen-Unsworth, L. C. (2014). Food supply depends on seagrass meadows in the coral triangle. Environmental Research Letters, 9(9). https://doi.org/10.1088/1748-9326/9/9/094005	2014	1				no evidence found	Supportive
107	Nguyen, K. A. T., Jolly, C. M., & Nguelifack, B. M. (2018). Biodiversity, coastal protection and resource endowment: Policy options for improving ocean health. Journal of Policy Modeling, 40(2), 242–264. https://doi.org/10.1016/j.jpolmod.2018.02.002	2018	1				no evidence	Supportive
110	Long, S., Jones, P. J. S., Randriana, Z., & Hadj-Hammou, J. (2021). Governance analysis of a community managed small-scale crab fishery in Madagascar: novel use of an empirical framework. Marine Policy, 127(December 2017), 102974. https://doi.org/10.1016/j.marpol.2017.11.022	2021	1				no evidence	Supportive
111	White, A. T., Eisma-Osorio, R. L., & Green, S. J. (2005). Integrated coastal management and marine protected areas: Complementarity in the Philippines. Ocean and Coastal Management, 48(11–12), 948–971. https://doi.org/10.1016/j.ocecoaman.2005.03.006	2005	1	Report	Qualitative	Document review	﻿Recent studies have not only indicated the beneficial impacts of fish sanctuaries on fishery yields and protecting the coral reef but that people participating in such management efforts gain in a variety of ways related to food security, cash income from tourism, and pride in their protection role [29,35].	Positive	Phillipines	Multi-site	NA- narrative paper	Secondary	Direct	Assumed	Actual	Various grey and published literature
113	Thurlow, G., & Jones, P. J. S. (2021). A governance analysis of Soufriere Marine Management Area, Saint Lucia: Previously effective but increasingly challenged by driving forces. Marine Policy, 127(October 2020), 104220. https://doi.org/10.1016/j.marpol.2020.104220	2021	1	Original research	Qualitative	Interviews, document analysis	﻿Residents from Soufri`ere are given priority over residents from other towns when it comes to employment at the SMMA itself and for other jobs in the marine basin, such as dive operators.	Both	Saint Lucia	Single-site	NA- narrative paper	Both	Both	Observed	Actual	﻿To obtain the data, 3 methods were employed: document analysis, semi-structured interviews and ethnographic observations	﻿Soufriere Marine Management Area	110	Tropical	22	Y	Y	N	Both (co-mangement)
							﻿There is no reinvestment of MPA income in facilities for the local community. The absence of these community advantages undermines the SMMA’s potential to achieve its socioeconomic objectives.
115	Costello, C., & Ovando, D. (2019). Status, Institutions, and Prospects for Global Capture Fisheries. Annual Review of Environment and Resources, 44, 177–200. https://doi.org/10.1146/annurev-environ-101718-033310	2019	1	Review	Literature review	Document review	﻿Rebuilding plans were im- plemented that resulted in large reductions in fishing pressure, and large MPAs were also created. While these interventions had some (at least short-term) negative economic consequences for lo- cal fishing communities, over time they appear to have contributed substantially to the recovery ofmany economically and ecologically critical stocks.	Both	Global	Multi-site	NA- narrative paper	Secondary	Direct	Observed	Both	Various grey and published literature
116	Perera, N., & De Vos, A. (2007). Marine protected areas in Sri Lanka: A review. Environmental Management, 40(5), 727–738. https://doi.org/10.1007/s00267-005-0154-x	2007					No evidence found - remove from sample?	Cautious
117	Ferse, S. C. A., Máñez Costa, M., Mez, K. S., Adhuri, D. S., & Glaser, M. (2010). Allies, not aliens: Increasing the role of local communities in marine protected area implementation. Environmental Conservation, 37(1), 23–34. https://doi.org/10.1017/S0376892910000172	2010	1	Review	Literature review	Document review	﻿Last, but not least, it endangers often already marginalized coastal livelihoods across the globe (Laffoley 2008).	Negative	Global	Conceptual	NA- narrative paper	Secondary	Direct	Assumed	Actual	Various grey and published literature
118	McClanahan, T. R., Mwaguni, S., & Muthiga, N. A. (2005). Management of the Kenyan coast. Ocean and Coastal Management, 48(11–12), 901–931. https://doi.org/10.1016/j.ocecoaman.2005.03.005	2005	1				no evidence	Cautious
120	Fox, H. E., Holtzman, J. L., Haisfield, K. M., McNally, C. G., Cid, G. A., Mascia, M. B., Parks, J. E., & Pomeroy, R. S. (2014). How Are Our MPAs Doing? Challenges in Assessing Global Patterns in Marine Protected Area Performance. Coastal Management, 42(3), 207–226. https://doi.org/10.1080/08920753.2014.904178	2014	1				no evidence	Cautious
123	Gonzalez, C., & Jentoft, S. (2011). MPA in labor: Securing the Pearl Cays of Nicaragua. Environmental Management, 47(4), 617–629. https://doi.org/10.1007/s00267-010-9587-y	2011	1				no evidence	Supportive
124	Mancha-Cisneros, M. del M., Suárez-Castillo, A. N., Torre, J., Anderies, J. M., & Gerber, L. R. (2018). The role of stakeholder perceptions and institutions for marine reserve efficacy in the Midriff Islands Region, Gulf of California, Mexico. Ocean and Coastal Management, 162(December 2017), 181–192. https://doi.org/10.1016/j.ocecoaman.2018.01.024	2018	1	Original research	Mixed methods	Interviews	﻿Nonetheless, 79% of fisher and community member respondents recognized that in theory, NTAs are generally beneficial for allowing more reproduction of commercially important species, and thus more catches and higher economic benefits for them	Positive	Mexico	Multi-site	Results	Both	Direct	Observed	Actual	﻿we conducted structured interviews based on previously identified potential caveats within the NTA sys- tems, according to the CIS framework
125	Selig, E. R., Kleisner, K. M., Ahoobim, O., Arocha, F., Cruz-Trinidad, A., Fujita, R., Hara, M., Katz, L., McConney, P., Ratner, B. D., Saavedra-Díaz, L. M., Schwarz, A. M., Thiao, D., Torell, E., Troëng, S., & Villasante, S. (2017). A typology of fisheries management tools: using experience to catalyse greater success. Fish and Fisheries, 18(3), 543–570. https://doi.org/10.1111/faf.12192	2017	1				no evidence	Unclear
126	Eastwood, E. K., Clary, D. G., & Melnick, D. J. (2017). Coral reef health and management on the verge of a tourism boom: A case study from Miches, Dominican Republic. Ocean and Coastal Management, 138, 192–204. https://doi.org/10.1016/j.ocecoaman.2017.01.023	2017	1				no evidence	Unclear
127	Gurney, G. G., Cinner, J., Ban, N. C., Pressey, R. L., Pollnac, R., Campbell, S. J., Tasidjawa, S., & Setiawan, F. (2014). Poverty and protected areas: An evaluation of a marine integrated conservation and development project in Indonesia. Global Environmental Change, 26(1), 98–107. https://doi.org/10.1016/j.gloenvcha.2014.04.003	2014	1	Original research	Mixed methods	Interviews and surveys	﻿Positive impacts spanned all three poverty domains, but within each domain the magnitude of the effects and timescales over which they manifested were mixed. Importantly, positive impacts appeared to occur mostly during the implementation period, after which integrated MPA activities all but ceased and reductions in poverty did not continue to accrue.	Both	Indonesia	Multi-site	Results	Primary	Direct	Observed	Actual	﻿We used household surveys to gather quantitative data of several indicators of poverty, followed by semi-structured interviews with key informants, including heads of village, members of MPA groups, and traditional leaders
128	Gurney, G. G., Pressey, R. L., Cinner, J. E., Pollnac, R., & Campbell, S. J. (2015). Integrated conservation and development: Evaluating a community-based marine protected area project for equality of socioeconomic impacts. Philosophical Transactions of the Royal Society B: Biological Sciences, 370(1681). https://doi.org/10.1098/rstb.2014.0277	2015	1	same data as study 127 - removed to avoid double counting
131	Pennino, M. G., Rufener, M. C., Thomé-Souza, M. J. F., Carvalho, A. R., Lopes, P. F. M., & Sumaila, U. R. (2018). Searching for a compromise between biological and economic demands to protect vulnerable habitats. Scientific Reports, 8(1), 1–10. https://doi.org/10.1038/s41598-018-26130-z	2018	1	Original research	Quantitative	Model	﻿If the ecological area were entirely closed to fishing, fishers would lose 68% of their fishing grounds (7839 Km2). This would correspond to a loss of 55.2% (R$ 8673) of their total annual profit. Nevertheless, if only the ecological area that does not overlap with the economic one were closed to fishing, fishers would lose 21.8% of their fishing grounds (2506 Km2), representing a loss of R$ 153…	Negative	Brazil	Multi-site	Results	Both	Direct	Assumed	Hypothetical	﻿We used data from the artisanal fisheries that took place on the conti- nental shelves of two Brazilian states. Fish base life history data, environmental variable data for species distribution modelling
133	Kockel, A., Ban, N. C., Costa, M., & Dearden, P. (2020). Addressing distribution equity in spatial conservation prioritization for small-scale fisheries. PLoS ONE, 15(5), 1–23. https://doi.org/10.1371/journal.pone.0233339	2020	1	Original research	Mixed methods	Workshops and model	﻿Comparisons ofthe best MPA plan ofeach scenario in terms oftheir impacts on all fisheries at ﻿a resolution ofcommunities (i.e., 863 features; each defined by method and barangay), showed that scenario one was the best at maintaining distribution equity (Fig 3D), followed by scenario two (Fig 3E) and three (Fig 3F).	Both	Phillipines	Multi-site	Results	Both	Direct	Observed	Hypothetical	﻿We developed and held participatory mapping workshops to collect spatial data on the distribution patterns ofdifferent communities and types offisheries. ﻿we used remote sensing to produce the first high-resolution (2 m pixel resolution) benthic habitat map ofcoastal areas (less than 25 m deep) in Sogod Bay
134	Mcclanahan, T. R., & Abunge, C. A. (2016). Perceptions of fishing access restrictions and the disparity of benefits among stakeholder communities and nations of south-eastern Africa. Fish and Fisheries, 17(2), 417–437. https://doi.org/10.1111/faf.12118	2016	1	Original research	Mixed methods	Interviews and surveys	Table 1	Both	Kenya, Tanzania, Mozambique, Madagascar	Multi-site	Methods	Primary	Direct	Assumed	Actual	﻿Face-to-face interviews were undertaken with resource users and managers in Mozambique, Kenya, Tanzania and Madagascar between 2008 and 2013.﻿also included as part of studied previous socio-eco- nomic and fish-landing data evaluations indepen- dent of park evaluations
136	Aswani, S., & Ruddle, K. (2013). Design of realistic hybrid marine resource management programs in oceania. Pacific Science, 67(3), 461–476. https://doi.org/10.2984/67.3.11	2013	1	Review	Qualitative	Overview	﻿However, Pacific islanders prefer smaller and temporal (i.e., nonpermanent closure) MPAs that miti- gate negative economic impact of restrictions imposed by management. As	Both	Asia-Pacific	Multi-site	NA- narrative paper	Secondary	Direct	Assumed	Actual	﻿We build on our combined decades of mul- tidisciplinary natural and social science re- search and applied marine resource man- agement experience and publications in the Asia-Pacific region, particularly on Cinner and Aswani (2007), Ruddle and Hickey (2008), Ruddle and Satria (2010), and Aswani et al. (2012).
138	Hind, E. J., Hiponia, M. C., & Gray, T. S. (2010). From community-based to centralised national management-A wrong turning for the governance of the marine protected area in Apo Island, Philippines? Marine Policy, 34(1), 54–62. https://doi.org/10.1016/j.marpol.2009.04.011	2010	1	Original research	Qualitative	Interviews, surveys, focus group workshops	﻿The most praised impact of PAMB by interviewees and focus group participants was its creation of jobs [9] on the island, benefiting 33% households questionnaired in the survey	Both	Phillipines	Single-site	Results	Both	Direct	Observed	Actual	﻿The fieldwork data were collected during six weeks in April and May 2008 in two stages. The first stage was to administer questionnaires, ﻿The subject matter for the second stage—key informant interviews and focus group discussions— was drawn from observational notes taken during the first stag	Apo Island Marine Protected Area
							﻿This negative picture is supported by survey findings that rated the current socio- economic situation on the island at 4.6, and the effectiveness of the management in addressing socio-economic issues at 3.9. Women t-shirt sellers said that they had started selling t-shirts to supplement their husbands’ decreasing incomes from fishing
139	Adjeroud, M., Briand, M. J., Kayal, M., & Dumas, P. (2013). Coral assemblages in Tonga: Spatial patterns, replenishment capacities, and implications for conservation strategies. Environmental Monitoring and Assessment, 185(7), 5763–5773. https://doi.org/10.1007/s10661-012-2982-5						no evidence	Unclear
142	Fox, H. E., Mascia, M. B., Basurto, X., Costa, A., Glew, L., Heinemann, D., Karrer, L. B., Lester, S. E., Lombana, A. V., Pomeroy, R. S., Recchia, C. A., Roberts, C. M., Sanchirico, J. N., Pet-Soede, L., & White, A. T. (2012). Reexamining the science of marine protected areas: Linking knowledge to action. Conservation Letters, 5(1), 1–10. https://doi.org/10.1111/j.1755-263X.2011.00207.x	2012	1				no evidence	Supportive
143	Kamat, V. R. (2019). Dynamite Fishing in a Marine Protected Area in Tanzania: Why Youth Perceptions Matter. Coastal Management, 47(4), 387–405. https://doi.org/10.1080/08920753.2019.1619902	2019	1	Original research	Qualitative	Interviews, surveys, focus group workshops	﻿After the Marine Park people confiscated our nets and dugout canoes, we lost our ability to fish in the ocean with nets and other traps (mitego), so some fishers have resorted to dynamite fishing…they don’t have other tools or fishing gear, and because there are very few employment opportunities here, they continue to resort to dynamite fishing. It	Negative	Tanzania	Single-site	Results	Primary	Direct	Observed	Actual	﻿It draws on ethnographic data gath- ered through participant observation, focus group discussions and in- depth interviews with residents from two neighboring coastal villages – one located inside a marine protected area (MPA), and another located outside the MPA’s boundary	﻿Mnazi Bay-Ruvuma Estuary Marine Park	650	Tropical	18	Y	Y	Y	Top down
146	Johnson, S. M., Reyuw, B. M., Yalon, A., McLean, M., & Houk, P. (2020). Contextualizing the social-ecological outcomes of coral reef fisheries management. Biological Conservation, 241(November 2019), 108288. https://doi.org/10.1016/j.biocon.2019.108288	2020	1	Original research	Mixed methods	Interviews and surveys	Table 1	Both	Micronesia	Multi-site	Results	Both	Both	Observed	Actual	Interviews with village leaders, biological fish surveys, satellite spatial datasets
							﻿Communities lacking alternative economic options may be more in- clined to overexploit their resources as a means of participating in the cash economy (Cinner				Discussion
148	de Oliveira Júnior, J. G. C., Campos-Silva, J. V., Santos, D. T. V., Ladle, R. J., & da Silva Batista, V. (2021). Quantifying anthropogenic threats affecting Marine Protected Areas in developing countries. Journal of Environmental Management, 279(October 2020). https://doi.org/10.1016/j.jenvman.2020.111614	2021	1				no evidence	Cautious
160	Hogg, K., Semitiel-García, M., Noguera-Méndez, P., Gray, T., & Young, S. (2018). Perceptions of Threats Facing Cabo de Palos - Islas Hormigas MPA and Potential Solutions. Coastal Management, 46(1), 58–74. https://doi.org/10.1080/08920753.2018.1405330	2018	1				no evidence	Cautious
161	Hattam, C. E., Mangi, S. C., Gall, S. C., & Rodwell, L. D. (2014). Social impacts of a temperate fisheries closure: Understanding stakeholders’ views. Marine Policy, 45, 269–278. https://doi.org/10.1016/j.marpol.2013.09.005	2014	1				no evidence	Cautious
165	Rist, P., Rassip, W., Yunupingu, D., Wearne, J., Gould, J., Dulfer-Hyams, M., Bock, E., & Smyth, D. (2019). Indigenous protected areas in Sea Country: Indigenous-driven collaborative marine protected areas in Australia. Aquatic Conservation: Marine and Freshwater Ecosystems, 29(S2), 138–151. https://doi.org/10.1002/aqc.3052	2019	1	Review	Literature review	Overview	﻿Through its IPA program, the Australian Government provides financial and other support to indigenous Traditional Owner groups wishing to plan and manage an IPA	Positive	Australia	Multi-site	NA- narrative paper	Secondary	Direct	Assumed	Actual	Various grey and published literature
166	Badalamenti, F., Ramos, A. A., Voultsiadou, E., Lizaso, J. L. S., D’Anna, G., Pipitone, J., Mas, J., Ruiz Fernandez, J. A., Whitmarsh, D., & Riggio, S. (2000). Cultural and socio-economic impacts of Mediterranean marine protected areas. Environmental Conservation, 27(2), 110–125.	2000	1	Review	Literature review	Overview	﻿Overall, only one published study demonstrated potential benefits, namely an eight-fold increase in catch per unit effort as a result of a four-year trawling ban in the Gulf of Castellammare in Sicily (Pipitone et al. 1996) and improved economic revenue for the small- scale fishers there	Positive	Italy, Spain, France	Multi-site	NA- narrative paper	Secondary	Direct	Observed	Actual	﻿In this paper we review the few studies which exist on Mediterranean MPAs, with special regard to those developed within the European Union (EU),
173	Muallil, R. N., Mamauag, S. S., Cabral, R. B., Celeste-Dizon, E. O., & Aliño, P. M. (2014). Status, trends and challenges in the sustainability of small-scale fisheries in the Philippines: Insights from FISHDA (Fishing Industries’ Support in Handling Decisions Application) model. Marine Policy, 44, 212–221. https://doi.org/10.1016/j.marpol.2013.08.026	2014	1	Original research	Quantitative	Interviews, model	﻿The recommendation that as high as 58% of the municipal waters must be closed from all fishing activities to achieve fisheries sustainability may be impossible to implement for the majority of coastal areas in the Philippines where large portion of the population is highly dependent on the fishery and alternative opportunities outside the fishery are lacking. Many fishers would be displaced and …	Negative	Phillipines	Conceptual	Discussion	Both	Direct	Assumed	Hypothetical	﻿Primary fisheries and socioeconomic data were generated through snow-ball one-on-one interviews with a total of 6488 small-scale fishers aged 16 to 77 years old in 44 coastal towns or municipalities representing all the six biogeographic regions of the Philippines
175	Teixeira, J. B., Moura, R. L., Mills, M., Klein, C., Brown, C. J., Adams, V. M., Grantham, H., Watts, M., Faria, D., Amado-Filho, G. M., Bastos, A. C., Lourival, R., & Possingham, H. P. (2018). A habitat-based approach to predict impacts of marine protected areas on fishers. Conservation Biology, 32(5), 1096–1106. https://doi.org/10.1111/cobi.12974	2018	1				no evidence	Supportive
176	Kabbadj, L., Van Wynsberge, S., & Andréfouët, S. (2018). Scaling tropical island conservation planning to the regional level can lead to unbalanced ecological representation and poor social equity among islands. Marine Policy, 93(October 2017), 31–39. https://doi.org/10.1016/j.marpol.2018.03.024	2018	1				no evidence	Cautious
							no evidence
178	Alvarado, J. J., Cortés, J., Esquivel, M. F., & Salas, E. (2012). Costa Rica’s marine protected areas: Status and perspectives. Revista de Biologia Tropical, 60(1), 129–142. https://doi.org/10.15517/rbt.v60i1.2657	2012	1				no evidence	Supportive
179	Voyer, M., Gladstone, W., & Goodall, H. (2014). Understanding marine park opposition: The relationship between social impacts, environmental knowledge and motivation to fish. Aquatic Conservation: Marine and Freshwater Ecosystems, 24(4), 441–462. https://doi.org/10.1002/aqc.2363	2014	1	Original research	Mixed methods	Interviews	﻿Loss of income and Loss of options and flexibility, either through loss of endorsements or access to fishing grounds	Negative	Australia	Multi-site	Results	Primary	Direct	Observed	Actual	﻿A series of semi-structured interviews were conducted with interview participants selected using a variety of means, including approaching key informants (such as members of the government advisory committees and prominent media spokespeople) and ‘snowball’ sampling whereby participants nominated additional potential interviewees
181	Cinner, J. E. (2007). Designing marine reserves to reflect local socioeconomic conditions: Lessons from long-enduring customary management systems. Coral Reefs, 26(4), 1035–1045. https://doi.org/10.1007/s00338-007-0213-2	2007	1				no evidence	Cautious
186	Cabral, R. B., Halpern, B. S., Lester, S. E., White, C., Gaines, S. D., & Costello, C. (2019). Designing MPAs for food security in open-access fisheries. Scientific Reports, 9(1), 1–10. https://doi.org/10.1038/s41598-019-44406-w	2019	1				no evidence	Supportive
189	Katikiro, R. E. (2016). Improving alternative livelihood interventions in marine protected areas: A case study in Tanzania. Marine Policy, 70, 22–29. https://doi.org/10.1016/j.marpol.2016.04.025	2016	1	Original research	Mixed methods	Interviews, surveys	﻿Overall, 70% of survey respondents stated that the project ac- tivities could not compete with the income gained from fisheries	Negative	Tanzania	Single-site	Results	Both	Direct	Observed	Actual	﻿Data sources comprised ﻿focus group meetings with local community members, key in- formant interviews with MBREMP personnel and Mtwara district fisheries officials, and a household questionnaire survey combined with a review of secondary data sources	﻿Mnazi Bay-Ruvuma Estuary Marine Park	650	Tropical	15	Y	?	Y	Top down
192	Isaac, V. J., & Ferrari, S. F. (2017). Assessment and management of the North Brazil Shelf Large Marine Ecosystem. Environmental Development, 22(August 2016), 97–110. https://doi.org/10.1016/j.envdev.2016.11.004	2017	1				no evidence	Supportive
206	Castilla, J. C., & Defeo, O. (2001). Latin American benthic shellfisheries: Emphasis on co-management and experimental practices. Reviews in Fish Biology and Fisheries, 11(1), 1–30. https://doi.org/10.1023/A:1014235924952	2001	1				no evidence	Unclear
207	Cannot find full paper
208	Advani, S., Rix, L. N., Aherne, D. M., Alwany, M. A., & Bailey, D. M. (2015). Distance from a fishing community explains fish abundance in a no-take zone with weak compliance. PLoS ONE, 10(5), 1–17. https://doi.org/10.1371/journal.pone.0126098	2015	1	Original research	Quantitative	Model	﻿The network of five small no-take zones in the Nabq MRPA were systematically established in order to increase spillover and sustain the local fishery [30]. Fif- teen years on, documented decreases in CPUE in the larger network ofno-take areas in Nabq [33], coupled with our findings ofreduced reserve effect and increased non-compliance in the South El Ghargana no-take zone suggest that the initia…	Negative	Egypt	Single-site	Discussion	Primary	Indirect	Assumed	Actual	﻿Fish abundances were estimated using SCUBA Underwater Visual Census (UVC) between June and July, 2011. Video transects of benthic substrates	﻿Nabq MRPA	122	Sub tropical	16	Y	Y	N	Top down
209	Quintana, A. C. E., Giron-Nava, A., Urmy, S., Cramer, A. N., Domínguez-Sánchez, S., Rodríguez-Van Dyck, S., Aburto-Oropeza, O., Basurto, X., & Weaver, A. H. (2021). Positive Social-Ecological Feedbacks in Community-Based Conservation. Frontiers in Marine Science, 8(May), 1–18. https://doi.org/10.3389/fmars.2021.652318	2021	1	Original research	Qualitative	Interviews and surveys	﻿68% reported an increase in government subsidies	Positive	Mexico	Multi-site	Results	Primary	Direct	Observed	Actual	qualitative data about perceptions of the fishing refugia from 6 months of in-depth fieldwork including observation, journaling, and informal and semi-structured interviews (n = 68) with stakeholders involved in implementing and evaluating them, as well as document analysis of legal documents and white papers
221	Banks, S. A., & Skilleter, G. A. (2007). The importance of incorporating fine-scale habitat data into the design of an intertidal marine reserve system. Biological Conservation, 138(1–2), 13–29. https://doi.org/10.1016/j.biocon.2007.03.021	2007	1				no evidence	Supportive
225	Cinner, J. E., Daw, T., Huchery, C., Thoya, P., Wamukota, A., Cedras, M., & Abunge, C. (2014). Winners and Losers in Marine Conservation: Fishers’ Displacement and Livelihood Benefits from Marine Reserves. Society and Natural Resources, 27(9), 994–1005. https://doi.org/10.1080/08941920.2014.918229	2014	1	Original research	Mixed methods	Interviews	﻿In Seychelles, 75% of fishers felt that marine reserves were positive for their livelihood	Both	Kenya and Seychelles	Multi-site	Results	Primary	Direct	Observed	Actual	﻿We conducted structured interviews with fishers considered key spatial decision makers during fishing (mostly captains). In Kenya, sampling of fishers was in dis- crete landing sites, while, due to the lower numbers of fishers in Seychelles, fishers were sampled from around the coastline of the two main islands (Mahe
							﻿In Kenya, 35% felt a negative impact and 19% felt a positive impact on their livelihood
229	Cinner, J. E., & McClanahan, T. R. (2015). A sea change on the African coast? Preliminary social and ecological outcomes of a governance transformation in Kenyan fisheries. Global Environmental Change, 30, 133–139.	2015	1	Original research	Mixed methods	Interviews and biological surveys	﻿The BMU policy initially created divergent perspectives of both winners (the 30% of respondents who felt it was beneficial for their livelihood in 2008) and losers (the 22% who felt it was detrimental)	Both	Kenya	Multi-site	Results	Primary	Both	Observed	Actual	﻿We employed a combination of household surveys and semi-structured interviews with BMU leaders. ﻿In addition, we used underwater visual census to examine fish biomass and coral cover conditions over time in
230	Darling, E. S. (2014). Assessing the effect of marine reserves on household food security in Kenyan coral reef fishing communities. PLoS ONE, 9(11), 1–20. https://doi.org/10.1371/journal.pone.0113614	2014	1				no evidence	Supportive
235	Tilley, A., Hunnam, K. J., Mills, D. J., Steenbergen, D. J., Govan, H., Alonso-Poblacion, E., Roscher, M., Pereira, M., Rodrigues, P., Amador, T., Duarte, A., Gomes, M., & Cohen, P. J. (2019). Evaluating the fit of co-management for small-scale fisheries governance in timor-leste. Frontiers in Marine Science, 6(JUL), 1–17. https://doi.org/10.3389/fmars.2019.00392	2019	1	Review	Qualitative	Interviews and literature review	﻿It represents a successful case in managing small-scale fisheries that can and has been expanded further afield, as compliance to regulations seems very strong with clear, direct benefits from tourism income	Positive	Timor-Leste	Multi-site	Discussion	Both	Indirect	Assumed	Actual	Both published and unpublished literature. ﻿Also from the firsthand experiences of authors who were facilitators in the co- management establishment processes.
236	Webb, E. L., Maliao, R. J., & Siar, S. V. (2004). Using local user perceptions to evaluate outcomes of protected area management in the Sagay Marine Reserve, Philippines. Environmental Conservation, 31(2), 138–148. https://doi.org/10.1017/S0376892904001377	2004	1	Original research	Qualitative	Interviews	﻿For 11 of the 12 indicators, the mainland respondents returned more positive responses toward the SMR than the Molocaboc Island residents. Differences in mainland and island perceptions of control over the resource, fairness in access to the resource, income, fisher-fisher cooperation, com- munity compliance and communication were statistically significant. Whereas mainland respondents considere…	Both	Phillipines	Multi-site	Results	Primary	Direct	Observed	Actual	﻿We interviewed 62 respondents (31 male, 31 female; 44 on the mainland, 18 on Molocaboc Island) from the six SMR coastal villages	Sagay Marine Reserve	320	Tropical	4	Y	Y	Y	Top down
239	Manejar, A. J. A., Sandoy, L. M. H., & Subade, R. F. (2019). Linking marine biodiversity conservation and poverty alleviation: A case study in selected rural communities of Sagay Marine Reserve, Negros Occidental. Marine Policy, 104(February), 12–18. https://doi.org/10.1016/j.marpol.2019.02.015	2019	1	Original research	Mixed methods	Interviews and model	﻿It was integral to refer to the general objective which was to determine whether biodiversity conservation has indeed contributed to poverty alleviation of poor coastal communities of Brgy. Bulanon. In spite of the assumption that conservation efforts were supposed to in- crease the household communities’ income and for them to perceive that they were alleviated from poverty, data showed that mo…	Both	Phillipines	Single-site	Discussion	Both	Both	Observed	Actual	Interviews and fish catch data	﻿Sagay Marine Reserve	320	Tropical	19	Y	Y	Y	Top down
249	Anticamara, J. A., & Go, K. T. B. (2016). Spatio-temporal declines in philippine fisheries and its implications to coastal municipal fishers’ catch and income. Frontiers in Marine Science, 3(MAR), 1–10. https://doi.org/10.3389/fmars.2016.00021	2016	1				no evidence	Supportive
254	Owuor, M. A., Icely, J., Newton, A., Nyunja, J., Otieno, P., Tuda, A. O., & Oduor, N. (2017). Mapping of ecosystem services flow in Mida Creek, Kenya. Ocean and Coastal Management, 140, 11–21. https://doi.org/10.1016/j.ocecoaman.2017.02.013	2017	1	Original research	Mixed methods	Interviews and model	﻿In the case of recreation and tourism, the Dabaso board walk provides access to the mangroves for visitors, albeit for a fee. Indeed, the majority of the community members present during the survey engage in eco-tourism activities like canoe riding and tours along the mangrove boardwalks within the marine reserve. Nonetheless, the highest flows are for the beaches, probably due to their free acc…	Positive	Kenya	Single-site	Results	Both	Indirect	Observed	Actual	Grey literature, key stakeholder interviews and spatial data	﻿Watamu Marine National Reserve
255	Fröcklin, S., Jiddawi, N. S., & De la Torre-Castro, M. (2018). Small-scale innovations in coastal communities: Shell-handicraft as a way to empower women and decrease poverty. Ecology and Society, 23(2). https://doi.org/10.5751/ES-10136-230234	2018	1				no evidence	Unclear
259	Beger, M., Harborne, A. R., Dacles, T. P., Solandt, J. L., & Ledesma, G. L. (2004). A framework of lessons learned from community-based marine reserves and its effectiveness in guiding a new coastal management initiative in the Philippines. Environmental Management, 34(6), 786–801. https://doi.org/10.1007/s00267-004-0149-z	2004	1	Review	Qualitative	Literature review	﻿The presence of the volunteer research project provided income away from fishing at the start of PRRP.	Positive	Phillipines	Multi-site	Discussion	Secondary	Indirect	Observed	Hypothetical	Various grey and published literature
268	McDonald, G., Wilson, M., Veríssimo, D., Twohey, R., Clemence, M., Apistar, D., Box, S., Butler, P., Cadiz, F. C., Campbell, S. J., Cox, C., Effron, M., Gaines, S., Jakub, R., Mancao, R. H., Rojas, P. T., Tirona, R. S., & Vianna, G. (2020). Catalyzing sustainable fisheries management through behavior change interventions. Conservation Biology, 34(5), 1176–1189. https://doi.org/10.1111/cobi.13475	2020	1	Original research	Mixed methods	Interview and biological surveys	﻿In Indonesia, targeted fish biomass increased outside the NTZ and did not change inside the NTZ, whereas Philippines biomass decreased outside the NTZ and increased inside the NTZ. Many sustainable-livelihood indicators increased, although there was variability across countries regarding which indicators increased. Although livelihood stability increased across all 3 countries, social trust decr…	Both	Brazil, Indonesia, Phillipines	Multi-site	Results	Primary	Direct	Observed	Actual	Household questionnaires and underwater visual surveys
271	Cannot find full paper
279	Kamat, V. R. (2014). “The ocean is our farm”: Marine conservation, food insecurity, and social suffering in southeastern tanzania. Human Organization, 73(3), 289–298. https://doi.org/10.17730/humo.73.3.f43k115544761g0v	2014	1				no evidence	Cautious
280	Yusah, H. M., Shuib, A., Kunasekaran, P., & Nordin, N. A. (2018). Factors influencing residents’ attitude towards marine resource utilization in Tun Sakaran Marine Park, Malaysia. International Journal of Business and Society, 19(S1), 37–46.	2018	1				no evidence	Unclear
281	Lampe, M. (2017). Coral Reef Fisheries Resource Management in Taka Bonerate National Park Based on Constructionism Perspective. Advances in Social Science, Education and Humanities Research, 143(UICoSP), 41–45. https://doi.org/10.2991/uicosp-17.2017.12	2017	1				no evidence	Unclear
294	Grundy-Warr, C., Peachey, K., & Perry, M. (1999). Fragmented integration in the Singapore-Indonesian border zone: Southeast Asia’s “Growth Triangle” against the global economy. International Journal of Urban and Regional Research, 23(2), 304–328. https://doi.org/10.1111/1468-2427.00197	1999	1				no evidence	Unclear
295	Cinner, J. E., McClanahan, T. R., & Wamukota, A. (2010). Differences in livelihoods, socioeconomic characteristics, and knowledge about the sea between fishers and non-fishers living near and far from marine parks on the Kenyan coast. Marine Policy, 34(1), 22–28. https://doi.org/10.1016/j.marpol.2009.04.003	2010	1				no evidence	Cautious
296	Can't get full paper
298	Study sample cohort description - no results of study
299	Cini, F., & Saayman, M. (2013). Understanding visitors’ image of the oldest marine park in Africa. Current Issues in Tourism, 16(7–8), 664–681. https://doi.org/10.1080/13683500.2013.785481	2013	1				no evidence	Unclear
U1	Masud, M. M., Kari, F. B., Binti Yahaya, S. R., & Al-Amin, A. Q. (2014). Impact of residents’ livelihoods on attitudes towards environmental conservation behaviour: An empirical investigation of Tioman Island Marine Park area, Malaysia. Ocean and Coastal Management, 93, 7–14. https://doi.org/10.1016/j.ocecoaman.2014.03.008	2014	1	Original research	Quantitative	Questionnaires	﻿67.3% and 85.3% of respondents agreed that their standard of living and health, respectively, had improved since the establishment of the MPA	Both	Malaysia	Single-site	Results and Discussion'	Primary	Indirect	Observed	Actual	﻿This study used a questionnaire as the primary instrument to collect data.	Tioman Island Marine Park	?	Tropical	19	?	Y	?	?
							﻿However, most of the respondents (96.4%) on the Tioman Islands are quite anxious about the hike in food prices since the marine parks’ gazettement, and especially since the development of their islands as tourist desti- nations
U2	Mcleod, E., Bruton-Adams, M., Förster, J., Franco, C., Gaines, G., Gorong, B., James, R., Posing-Kulwaum, G., Tara, M., & Terk, E. (2019). Lessons from the pacific islands - Adapting to climate change by supporting social and ecological resilience. Frontiers in Marine Science, 6(JUN), 1–7. https://doi.org/10.3389/fmars.2019.00289	2019	1				no evidence	Supportive
U3	Weeks, R., & Jupiter, S. D. (2013). Adaptive Comanagement of a Marine Protected Area Network in Fiji. Conservation Biology, 27(6), 1234–1244. https://doi.org/10.1111/cobi.12153	2013	1	Report	Mixed methods	Workshops, biological surveys and model	﻿Due to positive attitudes toward existing protected areas, perceptions that the MPA network had benefited local fisheries (Egli et al. 2010; Jupiter et al. 2010), and financial rewards from a scholarship program funded by dive tags sold to tourists	Positive	Fiji	Multi-site	Discussion	Secondary	Direct	Assumed	Actual	﻿Data were collected on reef fish species abundance and size, benthic community compo- sition, coral population structure and recruitment, and physical site characteristics likely to reduce temperature stress, such as shading and flushing. ﻿Following the workshop, changes to MPA boundaries and management rules proposed by participants were digitized and compiled into 3 options: keep existing MPA …
E1	De Santo, E. M., Jones, P. J. S., & Miller, A. M. M. (2011). Fortress conservation at sea: A commentary on the Chagos marine protected area. Marine Policy, 35(2), 258–260. https://doi.org/10.1016/j.marpol.2010.09.004	2011	1				no evidence of impact	Cautious
E2	Richmond, L., & Kotowicz, D. (2015). Equity and access in marine protected areas: The history and future of “traditional indigenous fishing” in the Marianas Trench Marine National Monument. Applied Geography, 59, 117–124. https://doi.org/10.1016/j.apgeog.2014.11.007	2015	1	Original research	Mixed methods	Interviews and document review	﻿Government officials from the two territories were concerned that the designation impinged on their right to regulate the use of their own resources and that regulations in the Monument could restrict their territories' economic opportunities and could cause negative social and cultural impacts to their fishing communities	Negative	US overseas territories	Single-site	NA- narrative paper	Both	Indirect	Observed	Actual	﻿Semi-structured oral history interviews were conducted during two visits to Guam and Saipan in 2011 and during a follow-up visit to Saipan in 2012. We conducted group or individual interviews with a total of 40 individuals	Marianas Trench National Monument	246858	?	5	?	?	?	Top down
E3	Kleiber, D., Harris, L., & Vincent, A. C. J. (2018). Gender and marine protected areas: a case study of Danajon Bank, Philippines. Maritime Studies, 17(2), 163–175. https://doi.org/10.1007/s40152-018-0107-7	2018	1	Original research	Mixed methods	Interviews	﻿Among the respondents who reported that the MPA had an effect on their fishing, only a small number stated that the MPA had a negative effect on their fishing (3% of women and 4% of men). In these cases both women and men stated the MPA decreased their fish catch by limiting their fishing grounds (Fig. 2). Among the women and men that perceived a positive effect from the MPA on their fishing, mo…	Both	Phillipines	Multi-site	Results	Primary	Direct	Observed	Actual	﻿We randomly selected 588 adult interview respondents (here defined as 16 or older) from the barangay census of each of the 12 communities
E6	Micheli, F., Saenz-Arroyo, A., Greenley, A., Vazquez, L., Espinoza Montes, J. A., Rossetto, M., & de Leo, G. A. (2012). Evidence that marine reserves enhance resilience to climatic impacts. PLoS ONE, 7(7). https://doi.org/10.1371/journal.pone.0040832	2012	1				no evidence	Supportive						Assumed	Actual
E7	Bates, A. E., Cooke, R. S. C., Duncan, M. I., Edgar, G. J., Bruno, J. F., Benedetti-Cecchi, L., Côté, I. M., Lefcheck, J. S., Costello, M. J., Barrett, N., Bird, T. J., Fenberg, P. B., & Stuart-Smith, R. D. (2019). Climate resilience in marine protected areas and the ‘Protection Paradox.’ Biological Conservation, 236(May 2018), 305–314. https://doi.org/10.1016/j.biocon.2019.05.005	2019	1				no evidence	Cautious
E5	Hill, L. S., Johnson, J. A., & Adamowski, J. (2016). Meeting Aichi Target 11: Equity considerations in Marine Protected Areas design. Ocean and Coastal Management, 134(2016), 112–119. https://doi.org/10.1016/j.ocecoaman.2016.09.017	2016	1	Review	Qualitative	Literature review	﻿The establishment of an MPA creates a financial and social burden on resource-dependent communities, even if the benefits of doing so would bring higher yields or revenue in the future (World Bank, 2006). On the other hand, some stakeholders can benefit greatly through commercial activities (e.g. tourism). Concerns	Both	Japan and Solomon Islands	Multi-site	Discussion	Secondary	Direct	Assumed	Actual	Various grey and published literature

## Sheet: SDG 2
Ref Number	Reference	Paper Year	SDG	Study type	Evidence type	Evidence type 2	Quote	Positive or negative influence	Geographical location	Study cover	Initial link to SDG target	Data: Primary or secondary use	Direct impact/Indirect impact	Assumed/Observed	Hypothetical/actual	Data source	MPA name	MPA size	Ecosystem	MPA age	Multiple Zones (Y or N)	MPA notake	Enforced (Y or N)	Governance
336	Diz, D., Johnson, D., Riddell, M., Rees, S., Battle, J., Gjerde, K., Hennige, S., & Roberts, J. M. (2018). Mainstreaming marine biodiversity into the SDGs: The role of other effective area-based conservation measures (SDG 14.5). Marine Policy, 93(August 2017), 251–261. https://doi.org/10.1016/j.marpol.2017.08.019	2018	2	Report	Project review	Overview	There have been visible short-term increases in octopus catch per unit effort (CPUE) for the days of opening (five days on first opening and six on second), in- cluding over 50 kilos of octopus from an area with previously no oc- topus caught, and a catch of over 900 kilos of fish and octopus in total over a five day period, with an average catch per trip over 12 kilos per fisher	Positive	Mozambique	Multi-site	NA- narrative paper	Secondary	Direct	Observed	Actual	Our Sea Our Life' internal project files
337	Ayers, C. A., Dearden, P., & Rollins, R. (2012). An exploration of Hul’qumi’num Coast Salish peoples’ attitudes towards the establishment of no-take zones within marine protected areas in the Salish Sea, Canada. Canadian Geographer, 56(2), 260–274. https://doi.org/10.1111/j.1541-0064.2012.00433.x	2012	2	Original research	Mixed methods	Interviews, surveys and focus groups	Table 4.	Both	Canada	Multi-site	Results	Primary	Direct	Assumed	Hypothetical	C﻿onducting individual interviews, focus groups, and field surveys. Interviews were conducted with 41 participants contacted because oftheir knowledge and interest in marine resource use.
340	Peterson, A. M., & Stead, S. M. (2011). Rule breaking and livelihood options in marine protected areas. Environmental Conservation, 38(3), 342–352. https://doi.org/10.1017/S0376892911000178	2011	2	Original research	Mixed methods	Interviews	﻿There were three main themes perceived as drivers for illegal fishing: (1) there are no alternatives for food or money;	Negative	Mauritius	Multi-site	Results	Primary	Direct	Observed	Actual	﻿Using semi-structured interviews, 72 fishers were surveyed on
343	Can't find full text - Northern Australia-indigenous fisheries management		2
344	Hey, E. (2013). The persistence of a concept: Maximum sustainable yield. The 1982 Law of the Sea Convention at 30: Successes, Challenges and New Agendas, 89–97. https://doi.org/10.1163/9789004245044_010	2013	2				no evidence	Unclear
354	Aswani, S., & Furusawa, T. (2007). Do marine protected areas affect human nutrition and health? A comparison between villages in Roviana, Solomon Islands. Coastal Management, 35(5), 545–565. https://doi.org/10.1080/08920750701593394	2007	2	Original research	Mixed methods	Interviews and model	﻿These data suggest that energy and protein intakes were generally higher in villages with high MPA effectiveness scores and that they were lower in villages with no MPAs (Nusa	Positive	Solomon islands	Multi-site	Results	Both	Direct	Observed	Actual	﻿A total of a 106 interviews were completed, each composed ofopen-ended, semi-structured, and structured questions. ﻿To investigate human nutritional intake, we employed a 24-hour dietary recall method in selected hamlets.
355	Fujita, R., Lynham, J., Micheli, F., Feinberg, P. G., Bourillón, L., Sáenz-Arroyo, A., & Markham, A. C. (2013). Ecomarkets for conservation and sustainable development in the coastal zone. Biological Reviews, 88(2), 273–286. https://doi.org/10.1111/j.1469-185X.2012.00251.x	2013	2				no evidence	Supportive
357	McGowan, J., Bode, M., Holden, M. H., Davis, K., Krueck, N. C., Beger, M., Yates, K. L., & Possingham, H. P. (2018). Ocean zoning within a sparing versus sharing framework. Theoretical Ecology, 11(2), 245–254. https://doi.org/10.1007/s12080-017-0364-x	2018	2	Original research	Quantitiative	Model	﻿We find that when management budgets are small, sea-sparing is the optimal management strategy because for all parameters tested, reserves are more cost-effective at increasing standing biomass than traditional fisheries management. For larger budgets, the optimal strategy switches to sea-sharing because, at a certain point, further investing to grow the no-take marine reserves reduces catch bel…	Both	Conceptual	Conceptual	Results	Secondary	Direct	Observed	Hypothetical	Simulated data
358	Wenzel, L., Gass, J., D’Iorio, M., & Blackburn, J. (2013). A national perspective on the role of marine protected areas in sustaining fisheries. Fisheries Research, 144, 23–27. https://doi.org/10.1016/j.fishres.2012.09.002	2013	2	Report	Qualitative	Overview	﻿Since 2001, the swordfish stock has been nearly rebuilt and	Positive	US	Multi-site	NA- narrative paper	Secondary	Direct	Assumed	Actual	Various grey and published literature
360	Libralato, S., Coll, M., Tempesta, M., Santojanni, A., Spoto, M., Palomera, I., Arneri, E., & Solidoro, C. (2010). Food-web traits of protected and exploited areas of the Adriatic Sea. Biological Conservation, 143(9), 2182–2194. https://doi.org/10.1016/j.biocon.2010.06.002	2010	2	Original research	Quantitiative	Model	﻿Analysis of biomass distri- bution along functional groups and of trophic spectra indicates that protected area presents higher mean trophic level of the community, higher biomasses, lower production and generally lower transfer effi- ciency than fished area	Positive	Italy	Single-site	Results	Secondary	Direct	Assumed	Actual	﻿The original food-web model representing the reserve was built with the best available local data and described the protected eco- system by means of 19 functional groups	﻿Miramare Natural Marine Reserve	1.2	Temperate	23	Y	0.25	?	Top down
361	Ratcliffe, N., Deagle, B., Love, K., Polanowski, A., Fielding, S., Wood, A. G., Hill, S., Grant, S., Belchier, M., Fleming, A., & Hall, J. (2021). Changes in prey fields increase the potential for spatial overlap between gentoo penguins and a krill fishery within a marine protected area. Diversity and Distributions, 27(3), 552–563. https://doi.org/10.1111/ddi.13216	2021	2				no evidence	Supportive
362	Benedetti, F., Jalabert, L., Sourisseau, M., Beker, B., Cailliau, C., Desnos, C., Elineau, A., Irisson, J. O., Lombard, F., Picheral, M., Stemmann, L., & Pouline, P. (2019). The seasonal and inter-annual fluctuations of plankton abundance and community structure in a North Atlantic Marine Protected Area. Frontiers in Marine Science, 6(APR), 1–16. https://doi.org/10.3389/fmars.2019.00214	2019	2				no evidence	Supportive
363	Kamat, V. R., & Woo Kinshella, M. L. (2018). Food insecurity and coping strategies in a marine protected area in southeastern Tanzania. Ecology of Food and Nutrition, 57(3), 187–205. https://doi.org/10.1080/03670244.2018.1455672	2018	2	Original research	Qualitative	Interviews	﻿Participants gave varying responses to whether they believed that the MBREMP had any positive or negative impact on the food security situation in Mkubiru village. Bi	Both	Tanzania	Single-site	Results	Primary	Direct	Observed	Actual	﻿Drawing on field- work concentrated in a representative coastal village, using data from inter- views with 120 women	﻿Mnazi Bay-Ruvuma Estuary Marine Park	650	Tropical	17	Y	Y	Y	Top down
364	Añabieza, M., Pajaro, M., Reyes, G., Tiburcio, F., & Watts, P. (2010). Philippine alliance of fisherfolk: Ecohealth practitioners for livelihood and food security. EcoHealth, 7(3), 394–399. https://doi.org/10.1007/s10393-010-0334-x	2013	2	Report/review	Project review	Overview	﻿Many Pamana MPA members have experienced increased food, health, and economic security for their communities, as predicted by Hatcher and Hatcher (2004). In a membership survey, 107 of 111 rep- resentatives from individual MPAs indicated that they be- lieve that their sanctuaries help to address the health and nutrition needs of their village or barangay. Only one did not think that there was a …	Positive	Phillipines	Multi-site	NA- narrative paper	Secondary	Direct	Observed	Actual	Various grey and published literature
366	Cabral, R. B., Bradley, D., Mayorga, J., Goodell, W., Friedlander, A. M., Sala, E., Costello, C., & Gaines, S. D. (2020). A global network of marine protected areas for food. Proceedings of the National Academy of Sciences of the United States of America, 117(45), 28134–28139. https://doi.org/10.1073/pnas.2000174117	2020	2	Original research	Quantitiative	Model	﻿Our analyses suggest large potential food benefits from strategic MPA implementation	Positive	Global	Multi-site	Results	Secondary	Direct	Observed	Hypothetical	﻿The spatial distribution of K for each stock is derived by combining the maximum sustainable yield estimate per stock reported in Costello et al. (1) and growth rate per species from Thorson (77), FishBase (78), and SeaLifeBase (79) to calculate the total K. ﻿We use the RAM Legacy Stock Assessment database (28) to derive the most re- cent exploitation rates of assessed stocks
368	Ward, M., Possingham, H., Rhodes, J. R., & Mumby, P. (2018). Food, money and lobsters: Valuing ecosystem services to align environmental management with Sustainable Development Goals. Ecosystem Services, 29, 56–69. https://doi.org/10.1016/j.ecoser.2017.10.023	2018	2	Original research	Quantitative	Model	﻿In this study, the BAU scenario yields the highest initial economic return and the highest ROI, however the trade-offs include a possible 50 per cent decrease of spawners and 6 times less available lobster-derived protein to the local communities. This could have many knock-on consequences such as increased poaching, further undernourishment and worsening poverty. H	Both	South Africa	Single-site	Discussion	Secondary	Direct	Assumed	Actual	Future scenario modelling - ﻿This calculation allowed us to approximate the available lobster-derived protein to local community and overseas/affluent communities, using the quantities generated by the InVEST model for each scenario.	Table Mountain National Park Marine Protected Area.	1000	Sub tropical	13	Y	Y	Y	Top down
							﻿However according to our data, if large-scale fisheries are excluded from harvesting lobster within the Marine Protected Area, by 2115 the West Coast Rock Lobster fishery can potentially yield 50 per cent more economic value than the BAU scenario, while also inducing the highest available protein to local communities and the highest economic spend on nutrition by local communities, both of which…
374	Campbell, L. M., Gray, N. J., Fairbanks, L., Silver, J. J., Gruby, R. L., Dubik, B. A., & Basurto, X. (2016). Global Oceans Governance: New and Emerging Issues. Annual Review of Environment and Resources, 41, 517–543. https://doi.org/10.1146/annurev-environ-102014-021121	2016	2				no evidence	Cautious
375	Can't access full article - ENVIRONMENTAL-EFFECTS OF MARINE FISHING
387	Tupper, M., Asif, F., Garces, L. R., & Pido, M. D. (2015). Evaluating the management effectiveness of marine protected areas at seven selected sites in the Philippines. Marine Policy, 56, 33–42. https://doi.org/10.1016/j.marpol.2015.02.008	2015	2	Original research	Mixed methods	Interviews and workshops	﻿the majority of ﻿fishers felt that target species were less available post-MPA establishment compared to before the MPAs were implemented. This is in congruence with the biophysical ratings for those sites.	Negative	Phillipines	Multi-site	Results	Primary	Direct	Observed	Actual	﻿A total of seven MPA study sites were selected in three provinces. ﻿A series of stakeholder consultation workshops were held. ﻿primary data gathering through house- hold survey and key informant interviews (KIIs).
388	Can't find full text - Interactions of productivity, predation risk, and fishing effort in the efficacy of marine protected areas for the central Pacific
392	Alva, S., Johnson, K., Jacob, A., D’Agnes, H., Mantovani, R., & Evans, T. (2016). Marine protected areas and children’s dietary diversity in the Philippines. Population and Environment, 37(3), 341–361. https://doi.org/10.1007/s11111-015-0240-9	2016	2	Original research	Quantitative	Model	﻿found a positive association between MPAs and children’s dietary diversity when the MPAs were located closer than 2 km to a child’s community	Positive	Phillipines	Multi-site	Results	Secondary	Direct	Observed	Actual	﻿This analysis uses data from two sources: the Philippines 2008 Demographic and Health Survey (DHS), which provided child nutrition indicators as well as sociodemographic control variables for the analysis; and georeferenced data on MPAs in the Philippines from the CCEF’s MPA database
393	Ovetz, R. (2006). The bottom line: An investigation of the economic, cultural and social costs of industrial longline fishing in the Pacific and the benefits of sustainable use marine protected areas. Marine Policy, 30(6), 809–820. https://doi.org/10.1016/j.marpol.2006.04.001	2006	2				no evidence	Supportive
394	Ison, S., Hills, J., Morris, C., & Stead, S. M. (2018). Sustainable financing of a national Marine Protected Area network in Fiji. Ocean and Coastal Management, 163(July), 352–363. https://doi.org/10.1016/j.ocecoaman.2018.07.011	2018	2	Original research	Mixed methods	Interviews and model	﻿Frequency of respondents valuing the 19 MPA benefits is illustrated in Fig. 2. Each benefit was ranked from very important to unimportant. Benefits va- lued most important by respondents were: ‘increased food source’‘in- crease fish size’, ‘more fish’ and, ‘appreciate of reef’.	Positive	Fiji	Multi-site	Results	Primary	Direct	Observed	Actual	﻿A total of 115 interviews covering five stakeholder groups across three sites were completed between June–August 2016.
397	Aldon, M. E. T., Fermin, A. C., & Agbayani, R. F. (2011). Socio-cultural context of fishers’ participation in coastal resources management in Anini-y, Antique in west central Philippines. Fisheries Research, 107(1–3), 112–121. https://doi.org/10.1016/j.fishres.2010.10.014	2011	2				no evidence	Supportive
401	Gjertsen, H. (2005). Can habitat protection lead to improvements in human well-being? Evidence from marine protected areas in the Philippines. World Development, 33(2 SPEC. ISS.), 199–217. https://doi.org/10.1016/j.worlddev.2004.07.009	2005	2	Original research	Mixed methods	Interviews, workshops and biological surveys	﻿A perplexing result is the negative effect of tourism on child nutritional status. This sug- gests that the benefits of tourism are not accru- ing to people within the communities and perhaps price increases associated with an in- flux of tourists are in fact decreasing commu- nity membersÕ purchasing power.	Both	Phillipines	Multi-site	Results	Primary	Indirect	Observed	Actual	﻿Data were collected through snorkel surveys of the reefs, official records, and interviews with fish- ermen, members of the MPA management committee, and key informants
403	Ngoc, Q. T. K. (2018). Impacts on the ecosystem and human well-being of the marine protected area in Cu Lao Cham, Vietnam. Marine Policy, 90(November 2017), 174–183. https://doi.org/10.1016/j.marpol.2017.12.015	2018	2	Original research	Mixed methods	Interviews and model	﻿Coral reef conservation activities and MPA im- plementation have been accepted by fishers as beneficial tools for the improvement of their food security. Our	Positive	Vietnam	Single-site	Results	Both	Both	Observed	Actual	﻿The data came from a survey conducted with fishing households and ﻿The data on reef and fish condition were obtained from the man- agement board of Cu Lao Cham MPA	﻿Cu Lao Cham MPA	51.75	Tropical	10	Y	Y	Y	Top down
408	Zhang, H. (2018). Fisheries cooperation in the South China Sea: Evaluating the options. Marine Policy, 89(October 2017), 67–76. https://doi.org/10.1016/j.marpol.2017.12.014	2017	2				no evidence	Cautious
409	Stoffle, B. W., & Stoffle, R. W. (2007). At the sea’s edge: Elders and children in the littorals of Barbados and the Bahamas. Human Ecology, 35(5), 547–558. https://doi.org/10.1007/s10745-006-9100-7	2007	2				no evidence	Cautious
412	Matera, J. (2016). Livelihood diversification and institutional (dis-)trust: Artisanal fishing communities under resource management programs in Providencia and Santa Catalina, Colombia. Marine Policy, 67, 22–29. https://doi.org/10.1016/j.marpol.2016.01.021	2016	2	Original research	Mixed methods	Interviews and questionnaires	﻿It showed that even with a diversified livelihood, most of the fishermen’s nutritional and economic security was tied to the fisheries, making conservation programs of significant concern for local communities	Negative	Colombia	Multi-site	Conclusion	Primary	Indirect	Observed	Actual	﻿The study covered fourteen months of fieldwork spanning from June 2008 to August 2009 during which structured interviews and ﻿questionnaires were administered to artisanal fishermen to obtain both quantitative and qualitative data on fishermen’s local liveli- hoods and their views on conservation
413	Ba, A., Chaboud, C., Schmidt, J., Diouf, M., Fall, M., Dème, M., & Brehmer, P. (2019). The potential impact of marine protected areas on the Senegalese sardinella fishery. Ocean and Coastal Management, 169(August 2018), 239–246. https://doi.org/10.1016/j.ocecoaman.2018.12.020	2019	2				no evidence	Cautious
414	Moshy, V. H., Bryceson, I., & Mwaipopo, R. (2015). Social-ecological Changes, Livelihoods and Resilience among Fishing Communities in Mafia Island Marine Park, Tanzania. Forum for Development Studies, 42(3), 529–553. https://doi.org/10.1080/08039410.2015.1065906	2015	2	Original research	Mixed methods	Interviews and surveys	﻿Park operations contributed to food insecurity both directly and indirectly by causing decreased fishing, fish catches, fish consumption, and income for purchasing food, including fis	Negative	Tanzania	Single-site	Results	Primary	Both	Observed	Actual	﻿Data were collected through in-depth interviews, focus group discussions, direct observation and questionnaire surveys. Interviewees	Mafia Island Marine Park	822	Tropical	19	Y	Y	Y	Top down
415	Loseto, L. L., Hoover, C., Ostertag, S., Whalen, D., Pearce, T., Paulic, J., Iacozza, J., & MacPhee, S. (2018). Beluga whales (Delphinapterus leucas), environmental change and marine protected areas in the Western Canadian Arctic. Estuarine, Coastal and Shelf Science, 212(May), 128–137. https://doi.org/10.1016/j.ecss.2018.05.026	2018	2				no evidence	Supportive
418	Mangubhai, S., Erdmann, M. V., Wilson, J. R., Huffard, C. L., Ballamu, F., Hidayat, N. I., Hitipeuw, C., Lazuardi, M. E., Muhajir, Pada, D., Purba, G., Rotinsulu, C., Rumetna, L., Sumolang, K., & Wen, W. (2012). Papuan Bird’s Head Seascape: Emerging threats and challenges in the global center of marine biodiversity. Marine Pollution Bulletin, 64(11), 2279–2295. https://doi.org/10.1016/j.marpolbul…	2012	2				no evidence	Supportive
425	Owusu, K. A., Acevedo-Trejos, E., Fall, M. M., & Merico, A. (2020). Effects of cooperation and different characteristics of Marine Protected Areas in a simulated small-scale fishery. Ecological Complexity, 44(October), 100876. https://doi.org/10.1016/j.ecocom.2020.100876	2020	2	Original research	Quantitative	Model	﻿We observed that with an MPA fish abundance and catch are higher under all cooperation levels than without an MPA	Positive	Conceptual	Multi-site	Results	Primary	Direct	Observed	Hypothetical	Simulated data
426	Rosegrant, M. W., Dey, M. M., Valmonte-Santos, R., & Chen, O. L. (2016). Economic impacts of climate change and climate change adaptation strategies in Vanuatu and Timor-Leste. Marine Policy, 67, 179–188. https://doi.org/10.1016/j.marpol.2015.12.010	2016	2				no evidence	Supportive
427	Ainsworth, C. H., Morzaria-Luna, H., Kaplan, I. C., Levin, P. S., Fulton, E. A., Cudney-Bueno, R., Turk-Boyer, P., Torre, J., Danemann, G. D., & Pfister, T. (2012). Effective ecosystem-based management must encourage regulatory compliance: A Gulf of California case study. Marine Policy, 36(6), 1275–1283. https://doi.org/10.1016/j.marpol.2012.03.016	2012	2				no evidence	Cautious
428	Ovetz, R. (2007). The bottom line: An investigation of the economic, cultural and social costs of high seas industrial longline fishing in the Pacific and the benefits of conservation (DOI:10.1016/j.marpol.2006.04.001). Marine Policy, 31(2), 217–228. https://doi.org/10.1016/j.marpol.2006.09.002	2007	2				republished article (see ref 393)
440	Whitfield, A. K., Attwood, C. G., Cowley, P. D., Lamberth, S. J., & Mann, B. Q. (2020). No-take estuarine-protected areas: The missing armour for the conservation of fishes. Koedoe, 62(1), 1–7. https://doi.org/10.4102/koedoe.v62i1.1648	2020	2				no evidence	Supportive
441	Sousa, R., Henriques, P., Vasconcelos, J., Pinto, A. R., Delgado, J., & Riera, R. (2020). The protection effects of marine protected areas on exploited molluscs from an oceanic archipelago. Aquatic Conservation: Marine and Freshwater Ecosystems, 30(4), 717–729. https://doi.org/10.1002/aqc.3285	2020	2				no evidence	Supportive
442	Durrant, H. M. S., Burridge, C. P., Kelaher, B. P., Barrett, N. S., Edgar, G. J., & Coleman, M. A. (2014). Implications of macroalgal isolation by distance for networks of marine protected areas. Conservation Biology, 28(2), 438–445. https://doi.org/10.1111/cobi.12203	2014	2				no evidence	Supportive
443	Guénette, S., Meissa, B., & Gascuel, D. (2014). Assessing the contribution of marine protected areas to the trophic functioning of ecosystems: A model for the Banc d’Arguin and the Mauritanian shelf. PLoS ONE, 9(4), 1–16. https://doi.org/10.1371/journal.pone.0094742	2014	2				no evidence	Supportive
444	Elfes, C. T., Longo, C., Halpern, B. S., Hardy, D., Scarborough, C., Best, B. D., Pinheiro, T., & Dutra, G. F. (2014). A regional-scale ocean health index for Brazil. PLoS ONE, 9(4). https://doi.org/10.1371/journal.pone.0092589	2014	2				no evidence	Supportive
450	Mangubhai, S., Wilson, J. R., Rumetna, L., Maturbongs, Y., & Purwanto. (2015). Explicitly incorporating socioeconomic criteria and data into marine protected area zoning. Ocean and Coastal Management, 116, 523–529. https://doi.org/10.1016/j.ocecoaman.2015.08.018	2015	2				no evidence	Supportive
457	Peterson, C. H., Franklin, K. P., & Cordes, E. E. (2020). Connectivity corridor conservation: A conceptual model for the restoration of a changing Gulf of Mexico ecosystem. Elementa, 8(1). https://doi.org/10.1525/elementa.016	2020	2				no evidence	Cautious
458	Unsworth, R. K. F., Hinder, S. L., Bodger, O. G., & Cullen-Unsworth, L. C. (2014). Food supply depends on seagrass meadows in the coral triangle. Environmental Research Letters, 9(9). https://doi.org/10.1088/1748-9326/9/9/094005	2014	2	Original research	Mixed methods	Interviews and model	﻿This is a 51% decrease in the average catch weight since 2004 and an 11% decrease since 2007.	Negative	Indonesia	Multi-site	Results	Both	Direct	Observed	Actual	﻿ecological, fisheries and market data combined with over 250 household interviews
461	Colléter, M., Gascuel, D., Albouy, C., Francour, P., Tito de Morais, L., Valls, A., & Le Loc’h, F. (2014). Fishing inside or outside? A case studies analysis of potential spillover effect from marine protected areas, using food web models. Journal of Marine Systems, 139, 383–395. https://doi.org/10.1016/j.jmarsys.2014.07.023	2014	2	Original research	Quantitative	Model	﻿Finally, MPA implementation resulted in an increase in the mean trophic level of the total biomass	Positive	France	Multi-site	Results	Secondary	Indirect	Assumed	Actual	﻿The input data for the models came mostly from field studies
462	Nguyen, K. A. T., Jolly, C. M., & Nguelifack, B. M. (2018). Biodiversity, coastal protection and resource endowment: Policy options for improving ocean health. Journal of Policy Modeling, 40(2), 242–264. https://doi.org/10.1016/j.jpolmod.2018.02.002	2018	2				no evidence	Supportive
465	Torres-Pulliza, D., Wilson, J. R., Darmawan, A., Campbell, S. J., & Andréfouët, S. (2013). Ecoregional scale seagrass mapping: A tool to support resilient MPA network design in the Coral Triangle. Ocean and Coastal Management, 80, 55–64. https://doi.org/10.1016/j.ocecoaman.2013.04.005	2013	2				no evidence	Supportive
468	Silvano, R. A. M., Nora, V., Andreoli, T. B., Lopes, P. F. M., & Begossi, A. (2017). The ‘ghost of past fishing’: Small-scale fisheries and conservation of threatened groupers in subtropical islands. Marine Policy, 75(September 2016), 125–132. https://doi.org/10.1016/j.marpol.2016.10.002	2017	2				no evidence	Cautious
469	Long, S., Jones, P. J. S., Randriana, Z., & Hadj-Hammou, J. (2021). Governance analysis of a community managed small-scale crab fishery in Madagascar: novel use of an empirical framework. Marine Policy, 127(November 2017), 102974. https://doi.org/10.1016/j.marpol.2017.11.022	2021	2				no evidence	Cautious
471	Mellado, T., Brochier, T., Timor, J., & Vitancurt, J. (2014). Use of local knowledge in marine protected area management. Marine Policy, 44, 390–396. https://doi.org/10.1016/j.marpol.2013.10.004	2014	2				no evidence	Supportive
473	McRuer, J., & Zethelius, M. (2017). The difference biocultural “place” makes to community efforts towards sustainable development: Youth participatory action research in a marine protected area of Colombia. International Review of Education, 63(6), 847–870. https://doi.org/10.1007/s11159-017-9690-x	2017	2				no evidence	Unclear
474	Costello, C., & Ovando, D. (2019). Status, Institutions, and Prospects for Global Capture Fisheries. Annual Review of Environment and Resources, 44, 177–200. https://doi.org/10.1146/annurev-environ-101718-033310	2019	2	Review	Literature review	Overview		Both	Global	Global	NA- narrative paper	Secondary	Both	Assumed	Actual	Various grey and published literature
475	Sowman, M., & Sunde, J. (2018). Social impacts of marine protected areas in South Africa on coastal fishing communities. Ocean and Coastal Management, 157(March), 168–179. https://doi.org/10.1016/j.ocecoaman.2018.02.013	2018	2	Original research	Qualitative	Interviews, surveys and focus groups	﻿In all cases, research participants repeatedly highlighted loss of access to natural resources, loss of livelihoods, loss of income and loss of employment, leading to food insecurity, less ex- change of food and	negative	South Africa	Multi-site	NA- narrative paper	Primary	Direct	Observed	Actual	﻿information gathered from 70 oral histories, over 250 key informant interviews and 28 focus groups
477	Brain, M. J., Nahuelhual, L., Gelcich, S., & Bozzeda, F. (2020). Marine conservation may not deliver ecosystem services and benefits to all: Insights from Chilean Patagonia. Ecosystem Services, 45(August), 101170. https://doi.org/10.1016/j.ecoser.2020.101170	2020	2	Original research	Mixed methods	Interviews and model	﻿Most fishers agreed that the MUMPA would decrease food provision (Fig. 5 a), which contrasted with the other three groups who coincided on its maintenance. For	Both	Chile	Single-site	Results	Primary	Both	Assumed	Hypothetical	﻿As one fisher stated: ‘The ecosystem service [food provision] will increase, because scallop extraction quotas will be set, but my benefits will decrease’ (Artisanal
481	Reithe, S., Armstrong, C. W., & Flaaten, O. (2014). Marine protected areas in a welfare-based perspective. Marine Policy, 49, 29–36. https://doi.org/10.1016/j.marpol.2014.04.002	2014	2	Original research	Quantitative	Model	﻿This paper has shown that for heavily overfished stocks an MPA may be used to protect stocks and their habitats, to maximize harvest and to increase consumer and producer surplus. It may also cause the number of people employed in the fishery to increase, both as a consequence of increased effort and an increase in landed quantity for processing and distribution.	Positive		Conceptual			Indirect	Observed	Hypothetical
490	Eastwood, E. K., Clary, D. G., & Melnick, D. J. (2017). Coral reef health and management on the verge of a tourism boom: A case study from Miches, Dominican Republic. Ocean and Coastal Management, 138, 192–204. https://doi.org/10.1016/j.ocecoaman.2017.01.023	2017	2				no evidence	Unclear
491	Selig, E. R., Kleisner, K. M., Ahoobim, O., Arocha, F., Cruz-Trinidad, A., Fujita, R., Hara, M., Katz, L., McConney, P., Ratner, B. D., Saavedra-Díaz, L. M., Schwarz, A. M., Thiao, D., Torell, E., Troëng, S., & Villasante, S. (2017). A typology of fisheries management tools: using experience to catalyse greater success. Fish and Fisheries, 18(3), 543–570. https://doi.org/10.1111/faf.12192	2017	2				no evidence	Supportive
497	Sala, E., Mayorga, J., Bradley, D., Cabral, R. B., Atwood, T. B., Auber, A., Cheung, W., Costello, C., Ferretti, F., Friedlander, A. M., Gaines, S. D., Garilao, C., Goodell, W., Halpern, B. S., Hinson, A., Kaschner, K., Kesner-Reyes, K., Leprieur, F., McGowan, J., … Lubchenco, J. (2021). Protecting the global ocean for biodiversity, food and climate. Nature, 592(7856), E25. https://doi.org/10.103…	2021	2	Original research	Quantitative	Model	﻿stra- tegically placed MPAs that cover 28% of the ocean could increase ﻿food provisioning by 5.9 million metric tonnes (MMT) relative to a business-as-usual scenario with no additional protection and unabated fishing pressure (	Positive	Global	Conceptual	Results	Secondary	Direct	Observed	Hypothetical	Global datasets
501	White, A. T., Aliño, P. M., Cros, A., Fatan, N. A., Green, A. L., Teoh, S. J., Laroya, L., Peterson, N., Tan, S., Tighe, S., Venegas-Li, R., Walton, A., & Wen, W. (2014). Marine Protected Areas in the Coral Triangle: Progress, Issues, and Options. Coastal Management, 42(2), 87–106. https://doi.org/10.1080/08920753.2014.878177	2014	2				no evidence	Supportive
503	Weigel, J. Y., Mannle, K. O., Bennett, N. J., Carter, E., Westlund, L., Burgener, V., Hoffman, Z., Simão Da Silva, A., Kane, E. A., Sanders, J., Piante, C., Wagiman, S., & Hellman, A. (2014). Marine protected areas and fisheries: Bridging the divide. Aquatic Conservation: Marine and Freshwater Ecosystems, 24(S2), 199–215. https://doi.org/10.1002/aqc.2514	2014	2	Review	Literature review	Overview	﻿This recovery in fish abundance inside the marine protected area contributed to a spill-over into the surrounding areas a	Positive	Global	Multi-site	NA- narrative paper	Secondary	Both	Observed	Actual	Various grey and published literature
505	Charles, A., Westlund, L., Bartley, D. M., Fletcher, W. J., Garcia, S., Govan, H., & Sanders, J. (2016). Fishing livelihoods as key to marine protected areas: insights from the World Parks Congress. Aquatic Conservation: Marine and Freshwater Ecosystems, 26(February), 165–184. https://doi.org/10.1002/aqc.2648	2016	2	Review	Literature review	Overview	﻿In Fiji, for example, where 79% of inshore fishery areas are in LMMAs, both food security and conservation goals are being achieved	Positive	Global	Conceptual	NA- narrative paper	Secondary	Both	Assumed	Actual	Various grey and published literature
530	Jenkins, A., Horwitz, P., & Arabena, K. (2018). My island home: Place-based integration of conservation and public health in Oceania. Environmental Conservation, 45(2), 125–136. https://doi.org/10.1017/S0376892918000061	2018	2	Review	Literature review	Overview	﻿The study demonstrated that villages with effective MPAs and positive cultural attitudes regarding ocean governance had higher levels of dietary energy and nutrient intakes than the villages without or with ineffective MPAs.	Both	Oceania	Multi-site	NA- narrative paper	Secondary	Both	Observed	Actual	Various grey and published literature
							﻿for example, demonstrated positive outcomes for reef health, but poor outcomes for child nutritional status (increased proportion of underweight children) in those Philippine MPAs that had higher fines for infringements and expensive boundary demarcations.
531	Whitney, C. K., Frid, A., Edgar, B. K., Walkus, J., Siwallace, P., Siwallace, I. L., & Ban, N. C. (2020). “Like the plains people losing the buffalo”: Perceptions of climate changimpacts, fisheries management, and adaptation actions by Indigenous peoples in coastal British Columbia, Canada. Ecology and Society, 25(4), 1–17. https://doi.org/10.5751/ES-12027-250433	2020	2				no evidence	Cautious
532	Paterson, C. J., Pernetta, J. C., Siraraksophon, S., Kato, Y., Barut, N. C., Saikliang, P., Vibol, O., Chee, P. E., Nguyen, T. T. N., Perbowo, N., Yunanda, T., & Armada, N. B. (2013). Fisheries refugia: A novel approach to integrating fisheries and habitat management in the context of small-scale fishing pressure. Ocean and Coastal Management, 85, 214–229. https://doi.org/10.1016/j.ocecoaman.2012…	2013	2				no evidence	Unclear
534	Diedrich, A., Stoeckl, N., Gurney, G. G., Esparon, M., & Pollnac, R. (2017). Social capital as a key determinant of perceived benefits of community-based marine protected areas. Conservation Biology, 31(2), 311–321. https://doi.org/10.1111/cobi.12808	2017	2	Original research	Mixed methods	Interviews and model	﻿They also believed that MPAs allow for preservation of corals resulting in more fish (the next most prevalent theme), which related to beliefs that more fish will leave (the sanctuary) and thus there will be more catch for the fish- ers.	Positive	Phillipines	Multi-site	Results	Primary	Direct	Assumed	Actual	﻿We collected survey data from 540 households in 19 villages with 17 associated MPAs
541	Watts, P., Koutouki, K., Booth, S., & Blum, S. (2017). Inuit food security in canada: arctic marine ethnoecology. Food Security, 9(3), 421–440. https://doi.org/10.1007/s12571-017-0668-0	2017	2				no evidence	Supportive
549	Murawski, S. A. (2000). Definitions of overfishing from an ecosystem perspective. ICES Journal of Marine Science, 57(3), 649–658. https://doi.org/10.1006/jmsc.2000.0738	2000	2				no evidence	Supportive
552	Calderon-Aguilera, L. E., Reyes-Bonilla, H., Olán-González, M., Castañeda-Rivero, F. R., & Perusquía-Ardón, J. C. (2021). Estimated flows and biomass in a no-take coral reef from the eastern tropical Pacific through network analysis. Ecological Indicators, 123(January). https://doi.org/10.1016/j.ecolind.2021.107359	2021	2				no evidence	Supportive
554	Ramírez, A., Ortiz, M., Steenbeek, J., & Christensen, V. (2015). Evaluation of the effects on rockfish and kelp artisanal fisheries of the proposed Mejillones Peninsula marine protected area (northern Chile, SE Pacific coast). Ecological Modelling, 297, 141–153. https://doi.org/10.1016/j.ecolmodel.2014.11.012	2015	2	Original research	Mixed methods	Interviews and model	﻿The fisheries indicators show negative effects for both MPA scenarios, with decreases in catch and profits for rockfish and kelp fisheries. Regarding	Negative	Chile	Conceptual	Discussion	Both	Direct	Observed	Hypothetical	﻿Semi-structured inter- views and mapping with the help of key informants from the cove. ﻿It incorporated information from field studies on biomass and information from the literature on fisheries landings, productivity, consumption rates and trophic interactions between target species and other relevant macrofauna species in the kelp ecosystem
561	Mcleod, E., Bruton-Adams, M., Förster, J., Franco, C., Gaines, G., Gorong, B., James, R., Posing-Kulwaum, G., Tara, M., & Terk, E. (2019). Lessons from the pacific islands - Adapting to climate change by supporting social and ecological resilience. Frontiers in Marine Science, 6(JUN), 1–7. https://doi.org/10.3389/fmars.2019.00289	2019	2				no evidence	Supportive
562	Satizábal, P. (2018). The unintended consequences of ‘responsible fishing’ for small-scale fisheries: Lessons from the Pacific coast of Colombia. Marine Policy, 89(December 2017), 50–57. https://doi.org/10.1016/j.marpol.2017.12.005	2018	2				no evidence	Unclear
563	Le Croizier, G., Lorrain, A., Schaal, G., Ketchum, J., Hoyos-Padilla, M., Besnard, L., Munaron, J. M., Le Loc’h, F., & Point, D. (2020). Trophic resources and mercury exposure of two silvertip shark populations in the Northeast Pacific Ocean. Chemosphere, 253. https://doi.org/10.1016/j.chemosphere.2020.126645	2020	2				no evidence	Supportive
570	Pauly, D. (2009). Beyond duplicity and ignorance in global fisheries. Scientia Marina, 73(2), 215–224. https://doi.org/10.3989/scimar.2009.73n2215	2009	2				no evidence	Supportive
573	Scridel, D., Utmar, P., Franzosini, C., Segarich, M., Menon, S., Burca, M., Diviacco, P., Ciriaco, S., del Negro, P., & Spoto, M. (2020). Sink or swim? Modernization of mussel farming methods may negatively impact established seabird communities. Biological Conservation, 243(February), 108458. https://doi.org/10.1016/j.biocon.2020.108458	2020	2				no evidence	Supportive
577	Amaral, A. C. Z., & Jablonski, S. (2005). Conservation of marine and coastal biodiversity in Brazil. Conservation Biology, 19(3), 625–631. https://doi.org/10.1111/j.1523-1739.2005.00692.x	2005	2				no evidence	Unclear
579	Cabral, R. B., Halpern, B. S., Lester, S. E., White, C., Gaines, S. D., & Costello, C. (2019). Designing MPAs for food security in open-access fisheries. Scientific Reports, 9(1), 1–10. https://doi.org/10.1038/s41598-019-44406-w	2019	2	Original research	Quantitative	Model	﻿We found that the economic parameters governing fishers’ behavior can strongly influence optimal MPA size for different biological characteristics of the target species. Generally, when economic conditions lead to severe overfishing in the absence of MPAs, large MPAs (>50%) can significantly improve both conservation and food provision	Positive	Conceptual	Single-site	Discussion	Secondary	Direct	Observed	Hypothetical	﻿No datasets were generated or analysed during the current study
600	Castilla, J. C., & Defeo, O. (2001). Latin American benthic shellfisheries: Emphasis on co-management and experimental practices. Reviews in Fish Biology and Fisheries, 11(1), 1–30. https://doi.org/10.1023/A:1014235924952	2001	2				no evidence	Unclear
602	Andrello, M., Guilhaumon, F., Albouy, C., Parravicini, V., Scholtens, J., Verley, P., Barange, M., Sumaila, U. R., Manel, S., & Mouillot, D. (2017). Global mismatch between fishing dependency and larval supply from marine reserves. Nature Communications, 8(May). https://doi.org/10.1038/ncomms16039	2017	2				no evidence	Supportive
604	Brunner, E. J., Jones, P. J. S., Friel, S., & Bartley, M. (2009). Fish, human health and marine ecosystem health: Policies in collision. International Journal of Epidemiology, 38(1), 93–100. https://doi.org/10.1093/ije/dyn157	2009	2				no evidence	Unclear
608	Landrigan, P. J., Stegeman, J. J., Fleming, L. E., Allemand, D., Anderson, D. M., Backer, L. C., Brucker-Davis, F., Chevalier, N., Corra, L., Czerucka, D., Bottein, M. Y. D., Demeneix, B., Depledge, M., Deheyn, D. D., Dorman, C. J., Fénichel, P., Fisher, S., Gaill, F., Galgani, F., … Rampal, P. (2020). Human health and ocean pollution. Annals of Global Health, 86(1), 1–64. https://doi.org/10.5334…	2020	2				no evidence	Supportive
609	Medeiros-Leal, W. M., Castello, L., Freitas, C. E. C., & Siqueira-Souza, F. K. (2021). Single-Species Co-management Improves Fish Assemblage Structure and Composition in a Tropical River. Frontiers in Ecology and Evolution, 9(March). https://doi.org/10.3389/fevo.2021.604170	2021	2				no evidence	Unclear
611	Samoilys, M. A., Osuka, K., Maina, G. W., & Obura, D. O. (2017). Artisanal fisheries on Kenya’s coral reefs: Decadal trends reveal management needs. In Fisheries Research (Vol. 186). https://doi.org/10.1016/j.fishres.2016.07.025	2017	2	Original research	Quantitative	Model	﻿Lethrinids are a valuable food fish group and range across a wide variety of habitats, not just coral reefs (Carpenter and Allen, 1989, Connell et al., 1998, Fitzpatrick et al., 2012). It is therefore of concern that they were absent in the 65-75% bracket of most recent catches (2007) of beach seines and gill nets. Analysis of UVC data showed that lethrinid abundance has increased in Parks in re…	Positive	Kenya	Multi-site	Results	Secondary	Direct	Observed	Actual	﻿A total of 23 papers and reports published between 1985 and 2012, documenting fisheries from 1984 to 2007 were used to extract key CPUE and catch composition variables and independent UVC estimates of fish density. ﻿A nine year (1998-2006) dataset (CORDIO unpubl.) on artisanal fisheries (only data for fin-fish) in one location, Diani-Chale, including UVC estimates of population abundance, was al…
612	Arantes, M. L., & Freitas, C. E. C. (2016). Effects of fisheries zoning and environmental characteristics on population parameters of the tambaqui (Colossoma macropomum) in managed floodplain lakes in the Central Amazon. Fisheries Management and Ecology, 23(2), 133–143. https://doi.org/10.1111/fme.12164	2016	2				no evidence	Supportive
616	Darling, E. S. (2014). Assessing the effect of marine reserves on household food security in Kenyan coral reef fishing communities. PLoS ONE, 9(11), 1–20. https://doi.org/10.1371/journal.pone.0113614	2014	2				no evidence	Cautious
628	Tilley, A., Hunnam, K. J., Mills, D. J., Steenbergen, D. J., Govan, H., Alonso-Poblacion, E., Roscher, M., Pereira, M., Rodrigues, P., Amador, T., Duarte, A., Gomes, M., & Cohen, P. J. (2019). Evaluating the fit of co-management for small-scale fisheries governance in timor-leste. Frontiers in Marine Science, 6(JUL), 1–17. https://doi.org/10.3389/fmars.2019.00392	2019	2				no evidence	Cautious
630	Lubchenco, J., Costello, C., Gaines, S. D., Leland, A., Jenks, B., Murawski, S., Schwaab, E., & Society, T. O. (2015). Solutions for recovering and sustaining the bounty of the ocean: Combining fishery reforms, rights-based fisheries management, and marine reserves. Oceanography, 28(2), 252–263.	2015	2	Review	Literature review	Overview	﻿With the estab- lishment of this MR in 2000, annual abun- dance, individual sizes, and sex ratios in the mutton snapper fishery recovered from a pre-1999 crash in annual catch and were stable through 2011 (Granados-	Positive	Global	Conceptual	NA-narrative paper	Secondary	Indirect	Observed	Actual	Various grey and published literature
636	Eduardo, L. N., Bertrand, A., Frédou, T., Lira, A. S., Lima, R. S., Ferreira, B. P., Menard, F., & Lucena-Frédou, F. (2020). Biodiversity, ecology, fisheries, and use and trade of Tetraodontiformes fishes reveal their socio-ecological significance along the tropical Brazilian continental shelf. Aquatic Conservation: Marine and Freshwater Ecosystems, 30(4), 761–774. https://doi.org/10.1002/aqc.3278	2020	2				no evidence	Supportive
637	Frisch, A. J., Cole, A. J., Hobbs, J. P. A., Rizzari, J. R., & Munkres, K. P. (2012). Effects of Spearfishing on Reef Fish Populations in a Multi-Use Conservation Area. PLoS ONE, 7(12). https://doi.org/10.1371/journal.pone.0051938	2012	2				no evidence	Supportive
640	Pauly, D., Christensen, V., Guénette, S., Pitcher, T. J., Sumaila, U. R., Walters, C. J., Watson, R., & Zeller, D. (2002). Towards sustainability in world fisheries. Nature, 418(6898), 689–695. https://doi.org/10.1038/nature01017	2002	2				no evidence	Supportive
644	Abesamis, R. A., Green, A. L., Russ, G. R., & Jadloc, C. R. L. (2014). The intrinsic vulnerability to fishing of coral reef fishes and their differential recovery in fishery closures. Reviews in Fish Biology and Fisheries, 24(4), 1033–1063. https://doi.org/10.1007/s11160-014-9362-x	2014	2				no evidence	Supportive
645	Falcó, C., & Moeller, H. V. (2022). Optimal spatial management in a multiuse marine habitat: Balancing fisheries and tourism. Natural Resource Modeling, 35(1). https://doi.org/10.1111/nrm.12309	2014					no evidence
646	Moreno, C. A. (2001). Community patterns generated by human harvesting on Chilean shores: a review. Aquatic Conservation: Marine and Freshwater Ecosystems, 11(February 2000), 19–30.	2001	2				no evidence	Supportive
652	Manejar, A. J. A., Sandoy, L. M. H., & Subade, R. F. (2019). Linking marine biodiversity conservation and poverty alleviation: A case study in selected rural communities of Sagay Marine Reserve, Negros Occidental. Marine Policy, 104(February), 12–18. https://doi.org/10.1016/j.marpol.2019.02.015	2019	2	Original research	Mixed methods	Interviews and model	﻿It was integral to refer to the general objective which was to determine whether biodiversity conservation has indeed contributed to poverty alleviation of poor coastal communities of Brgy. Bulanon. In spite of the assumption that conservation efforts were supposed to in- crease the household communities’ income and for them to perceive that they were alleviated from poverty, data showed that mo…	Both	Phillipines	Single-site	Discussion	Both	Both	Observed	Actual	Interviews and fish catch data	﻿Sagay Marine Reserve	320	Tropical	19	Y	Y	Y	Top down
654	Wabnitz, C. C. C., Cisneros-Montemayor, A. M., Hanich, Q., & Ota, Y. (2018). Ecotourism, climate change and reef fish consumption in Palau: Benefits, trade-offs and adaptation strategies. Marine Policy, 88(July 2017), 323–332. https://doi.org/10.1016/j.marpol.2017.07.022	2018	2				no evidence	Unclear
656	Krueck, N. C., Ahmadia, G. N., Possingham, H. P., Riginos, C., Treml, E. A., & Mumby, P. J. (2017). Marine Reserve Targets to Sustain and Rebuild Unregulated Fisheries. PLoS Biology, 15(1), 1–20. https://doi.org/10.1371/journal.pbio.2000537	2017	2	Original research	Quantitative	Model	﻿In this case, achieving the international Aichi target of10% “effective protection” by 2020 could ﻿substantially improve local fisher livelihoods and food security (S2C	Positive	Conceptual	Conceptual	Discussion	Both	Direct	Observed	Hypothetical	Data for model drawn from published papers
676	Coghlan, A. R., White, R., Dawson, T. P., Irving, R. A., Zeller, D., & Palomares, M. L. D. (2017). Reconstructed marine fisheries catches at a Remote Island Group: Pitcairn Islands (1950-2014). Frontiers in Marine Science, 4(September), 1–9. https://doi.org/10.3389/fmars.2017.00320	2017	2				no evidence	Supportive
685	Pauly, D., Watson, R., & Alder, J. (2005). Global trends in world fisheries: Impacts on marine ecosystems and food security. Philosophical Transactions of the Royal Society B: Biological Sciences, 360(1453), 5–12. https://doi.org/10.1098/rstb.2004.1574	2005	2				no evidence	Supportive
686	Dye, A. H., Lasiak, T. A., & Gabula, S. (1997). Recovery and recruitment of the brown mussel, Perna perna (L.), in Transkei: Implications for management. South African Journal of Zoology, 32(4), 118–123. https://doi.org/10.1080/02541858.1997.11448442	1997	2				no evidence	Unclear
691	Cavole, L. M., Andrade-Vera, S., Marin Jarrin, J. R., Dias, D. F., Aburto-Oropeza, O., & Barrágan-Paladines, M. J. (2020). Using local ecological knowledge of Fishers to infer the impact of climate variability in Galápagos’ small-scale fisheries. Marine Policy, 121(September), 1–10. https://doi.org/10.1016/j.marpol.2020.104195	2020	2				no evidence	Unclear
692	Micheli, F., Mumby, P. J., Brumbaugh, D. R., Broad, K., Dahlgren, C. P., Harborne, A. R., Holmes, K. E., Kappel, C. V., Litvin, S. Y., & Sanchirico, J. N. (2014). High vulnerability of ecosystem function and services to diversity loss in Caribbean coral reefs. Biological Conservation, 171, 186–194. https://doi.org/10.1016/j.biocon.2013.12.029	2014	2				no evidence	only inside MPA
696	Eddy, T. D., Pitcher, T. J., MacDiarmid, A. B., Byfield, T. T., Tam, J. C., Jones, T. T., Bell, J. J., & Gardner, J. P. A. (2014). Lobsters as keystone: Only in unfished ecosystems? Ecological Modelling, 275, 48–72. https://doi.org/10.1016/j.ecolmodel.2013.12.006	2014	2				no evidence	Supportive
702	Lowe, J., & Tejada, J. F. C. (2019). The role of livelihoods in collective engagement in sustainable integrated coastal management: Oslob Whale Sharks. Ocean and Coastal Management, 170(December 2018), 80–92. https://doi.org/10.1016/j.ocecoaman.2018.10.018	2019	2				no evidence	Unclear
708	Pitcher, T. J. (2001). Fisheries managed to rebuild ecosystems? Reconstructing the past to salvage the future. Ecological Applications, 11(2), 601–617. https://doi.org/10.1890/1051-0761(2001)011[0601:FMTRER]2.0.CO;2	2001	2				no evidence	Supportive
710	Gelcich, S., Cinner, J., Donlan, C. J., Tapia-Lewin, S., Godoy, N., & Castilla, J. C. (2017). Fishers’ perceptions on the Chilean coastal TURF system after two decades: Problems, benefits, and emerging needs. Bulletin of Marine Science, 93(1), 53–67. https://doi.org/10.5343/bms.2015.1082	2017	2				no evidence	Supportive
711	Kinshella, M. L. W. (2014). The land is now not fertile: Social landscapes of hunger in south-eastern coastal Tanzania. Anthropology and Medicine, 21(3), 290–301. https://doi.org/10.1080/13648470.2014.918931	2014	2	Original research	Qualitative	Interviews and focus groups	﻿The Marine Park pro- motes global tourism for the exotic wilderness and the Mtwara Port project is promoted to allow for faster and more efficient transportation of mineral and resource extraction. While these projects have promised to help local people, it has not balanced the loss of both land and sea resources and, consequently, has contributed to deepening food insecu- rity. The	Negative	Tanzania	Single-site	NA- narrative paper	Primary	Direct	Observed	Actual	Ethnographic fieldwork. ﻿Fourteen in-depth interviews and one focus group discussion (FGD) were conducted in 2011 using a semi-structured interviewing method.	﻿Mnazi Bay-Ruvuma Estuary Marine Park	650	Tropical	14	Y	Y	Y	Top down
713	Wang, P., Lu, Y., Su, H., Su, C., Johnson, A. C., Yu, L., & Jenkins, A. (2020). Managing health risks of perfluoroalkyl acids in aquatic food from a river-estuary-sea environment affected by fluorochemical industry. Environment International, 138(February), 105621. https://doi.org/10.1016/j.envint.2020.105621	2020	2				no evidence	Unclear
716	Kamat, V. R. (2014). “The ocean is our farm”: Marine conservation, food insecurity, and social suffering in southeastern tanzania. Human Organization, 73(3), 289–298. https://doi.org/10.17730/humo.73.3.f43k115544761g0v	2014	2	Original research	Qualitative	Interviews and focus groups	﻿Those who were solely reliant on fishing and marine extraction activities for their livelihood saw a direct connection between the implementation of the Marine Park and their deteriorating food security	Negative	Tanzania	Single-site	NA- narrative paper	Primary	Direct	Observed	Actual	﻿Data were gathered in two stages using a combination of methods: participant observation, interviews, and focus group discussions (FGDs).	﻿Mnazi Bay-Ruvuma Estuary Marine Park	650	Tropical	14	Y	Y	Y	Top down
727	Plagányi, É. E., Skewes, T., Murphy, N., Pascual, R., & Fischer, M. (2015). Crop rotations in the sea: Increasing returns and reducing risk of collapse in sea cucumber fisheries. Proceedings of the National Academy of Sciences of the United States of America, 112(21), 6760–6765. https://doi.org/10.1073/pnas.1406689112	2015	2				no evidence	Unclear
734	Potts, A. C., Sandy, K., Clarke, M., & Bobb, N. (2004). The Coral Reefs of Tobago: Status and Management TT - Los Arrecifes de Tobago: Condiciones y Manejo. Proceedings of the Gulf and Caribbean Fisheries Institute, 55, 765–776.	2004	2				no evidence	Unclear
766	Nickerson-Tietze, D. J. (2000). Scientific characterization and monitoring: Its application to integrated coastal management in Malaysia. Ecological Applications, 10(2), 386–396. https://doi.org/10.1890/1051-0761(2000)010[0386:SCAMIA]2.0.CO;2	2000	2	Review	Project review	Overview	﻿Reef fish catch increased between 1986 and 1996 in the vicinity of the Pulau Payar Marine Park (Fig. 3).	Positive	Malaysia	Single-site	NA- narrative paper	Secondary	Direct	Observed	Actual	Various grey and published literature	﻿Pulau Payar Marine Park	﻿68 000	Tropical	13	?	?	Y	Top down
778	Trégarot, E., Catry, T., Pottier, A., El-Hacen, E. H. M., Sidi Cheikh, M. A., Cornet, C. C., Maréchal, J. P., & Failler, P. (2021). Coastal protection assessment: a tradeoff between ecological, social, and economic issues. Ecosphere, 12(2). https://doi.org/10.1002/ecs2.3364	2021	2				no evidence	Supportive
795	Lewis, T. M., Behnke, C., & Moss, M. B. (2017). Glaucous-winged Gull Larus glaucescens monitoring in preparation for resuming native egg harvest in Glacier Bay National Park. Marine Ornithology, 45(2), 165–174.	2017	2				no evidence	Unclear
802	Golden, C. D., Borgerson, C., Rice, B. L., Allen, L. H., Anjaranirina, E. J. G., Barrett, C. B., Boateng, G., Gephart, J. A., Hampel, D., Hartl, D. L., Knippenberg, E., Myers, S. S., Ralalason, D. H., Ramihantaniarivo, H., Randriamady, H., Shahab-Ferdows, S., Vaitla, B., Volkman, S. K., & Vonona, M. A. (2019). Cohort description of the madagascar health and environmental research–antongil (MAHERY…	2019	2				Study sample cohort description - no results of study	Supportive
803	Bejarano, S., Pardede, S., Campbell, S. J., Hoey, A. S., & Ferse, S. C. A. (2019). Herbivorous fish rise as a destructive fishing practice falls in an Indonesian marine national park. Ecological Applications, 29(8). https://doi.org/10.1002/eap.1981	2019	2				no evidence	Cautious
814	Lunn, K. E., & Dearden, P. (2006). Monitoring small-scale marine fisheries: An example from Thailand’s Ko Chang archipelago. Fisheries Research, 77(1), 60–71. https://doi.org/10.1016/j.fishres.2005.08.009	2006	2				no evidence	Unclear
816	Gier, L., Christie, P., & Amolo, R. (2017). Community perceptions of scuba dive tourism development in Bien Unido, Bohol Island, Philippines. Journal of Coastal Conservation, 21(1), 153–166. https://doi.org/10.1007/s11852-016-0484-2	2017	2	Original research	Mixed methods	Interviews and surveys	﻿Stopping illegal fishing is good for the environment, is more productive for fish, brings more tourists here to see the big fish, and we will have something valuable to share with the next generation. Also, more fish mean the local people will have their daily food needs met.^ Bien	Both	Phillipines	Multi-site	NA- narrative paper	Primary	Both	Observed	Actual	﻿The study consists ofthirty-four qualitative interviews conducted in Bien Unido and four other dive tourist sites as well as 1117 quantitative surveys conducted with community members
							﻿If a fisherman catches and sells fish to a foreigner, he can sell it for a high price. So that is an advantage for the fisherman, because he can earn more money. But a Filipino living on this island cannot buy the fish any- more. That is a problem here.^ Tourism
826	Can't find full text - Environmental impacts of bivalve mariculture		2
E64	Robles-Zavala, E. (2014). Coastal livelihoods, poverty and well-being in Mexico. A case study of institutional and social constraints. Journal of Coastal Conservation, 18(4), 431–448. https://doi.org/10.1007/s11852-014-0329-9	2014	2				no evidence	Supportive
U4	Jones, J. P. G., Andriahajaina, F. B., Ranambinintsoa, E. H., Hockley, N. J., & Ravoahangimalala, O. (2006). The economic importance of freshwater crayfish harvesting in Madagascar and the potential of community-based conservation to improve management. Oryx, 40(2), 168–175. https://doi.org/10.1017/S0030605306000500	2006	2				no evidence	Supportive
438	Harvey, B. J., Nash, K. L., Blanchard, J. L., & Edwards, D. P. (2018). Ecosystem-based management of coral reefs under climate change. Ecology and Evolution, 8(12), 6354–6368. https://doi.org/10.1002/ece3.4146	2018	2				no evidence	Supportive
367	Svensson, P., Rodwell, L. D., & Attrill, M. J. (2010). The perceptions of local fishermen towards a hotel managed marine reserve in Vietnam. Ocean and Coastal Management, 53(3), 114–122. https://doi.org/10.1016/j.ocecoaman.2010.01.001	2010	2	Original research	Mixed methods	Interviews and questionnaires	﻿according to the majority ofthe fishermen from both surveys who fish within 200m of the reserve boundaries, the HMMRs are increasing the number, size or species richness of fish and providing spillover of, amongst others, large food fishes (e.g. Serranidae and Carangidae;	Positive	Vietnam	Single-site	Results	Primary	Direct	Observed	Actual	﻿Two sets of qualitative and quantitative, open and close-ended anonymous questionnaires were completed by the fishermen of Dam Mon in October 2006 and April 2007
383	Allegretti, A. M., Vaske, J. J., & Cottrell, S. (2012). Predicting Stakeholder Support for Fishery Policies. Coastal Management, 40(1), 20–32. https://doi.org/10.1080/08920753.2011.637484	2012	2				no evidence	Unclear
463	Mascia, M. B., Claus, C. A., & Naidoo, R. (2010). Impacts of Marine Protected Areas on Fishing Communities. 24(5), 1424–1429. https://doi.org/10.1111/j.1523-1739.2010.01523.x	2010	2	Review	Literature review	Meta-analysis	﻿Following MPA establishment, food security generally remained stable or increased in older and smaller MPAs.	Both	Global	Conceptual	Results	Secondary	Direct	Observed	Actual	﻿We searched the Web of Science, Proceedings of the International Coral ReefSymposium, and lists ofworks derived from these sources for peer-reviewed research ar- ticles that had three attributes: information on conditions before and after MPA establishment or on conditions in- side and outside MPA boundaries; detailed information specific to the level of sites and user groups; and em- pirical da…
617	Ovando, D., Dougherty, D., & Wilson, J. R. (2016). Market and design solutions to the short-term economic impacts of marine reserves. Fish and Fisheries, 17(4), 939–954. https://doi.org/10.1111/faf.12153	2016	2				no evidence	Cautious
E11	Klein, E. S., & Watters, G. M. (2020). What’s the catch? Profiling the benefits and costs associated with marine protected areas and displaced fishing in the Scotia Sea. PLoS ONE, 15(8 August), 1–24. https://doi.org/10.1371/journal.pone.0237425	2020	2	Original research	Quantitative	Model	﻿Our findings also indicate that benefits to predators do not necessarily come at the cost of adverse effects on the fishery. High catches are possible even as predator populations increase when an MPA displaces fishing from foraging areas (Figs 3, 6 and 7). This outcome suggests that effective protected areas can be designed to result in weaker trade-offs for people. In fact, the redistribution …	Positive	Scotia Sea	Conceptual	Discussion	Secondary	Indirect	Assumed	Hypothetical	Simulated data informed by recent tracking data
E12	McClure, E. C., Sievers, K. T., Abesamis, R. A., Hoey, A. S., Alcala, A. C., & Russ, G. R. (2020). Higher fish biomass inside than outside marine protected areas despite typhoon impacts in a complex reefscape. Biological Conservation, 241(February 2019), 108354. https://doi.org/10.1016/j.biocon.2019.108354	2020	2				no evidence	Supportive
E8	Alva, S., Johnson, K., Jacob, A., D’Agnes, H., Mantovani, R., & Evans, T. (2016). Marine protected areas and children’s dietary diversity in the Philippines. Population and Environment, 37(3), 341–361. https://doi.org/10.1007/s11111-015-0240-9	2016	2	Original research	Quantitative	Model	﻿positive association between MPAs and children’s dietary diversity when the MPAs were located closer than 2 km to a child’s community	Positive	Phillipines	Multi-site	Results	Secondary	Both	Observed	Actual	﻿This analysis uses data from two sources: the Philippines 2008 Demographic and Health Survey (DHS), which provided child nutrition indicators as well as sociodemographic control variables for the analysis; and georeferenced data on MPAs in the Philippines from the CCEF’s MPA database.

## Sheet: SDG 5
Ref Number	Reference	Paper Year	SDG	Study type	Evidence type	Evidence type 2	Quote	Positive or negative influence	Geographical location	Study cover	Initial link to SDG target	Data: Primary or secondary use	Direct impact/Indirect impact	Assumed/Observed	Hypothetical/actual	Data source	MPA name	MPA size	Ecosystem	MPA age	Multiple Zones (Y or N)	MPA notake	Enforced (Y or N)	Governance
411	Kinshella, M.L.W. (2014). 'The land is now not fertile': social landscapes of hungry in south-eastern coastal Tanzania. Anthropology & Medicine, 21(3), 290 - 301. https://doi.org/10.1080/13648470.2014.918931	2014	5	Original research	Local knowledge	Interviews, Focus groups		Negative	Tanzania	Single-site	Results	Primary	Fourteen in-depth interviews of Sinde villagers and a focus group with six women in one coastal village.
1373	Smith, S. L. (2012). Toward inclusive co-management: Factors influencing stakeholder participation. Coastal Management, 40(3), 327–337. https://doi.org/10.1080/08920753.2012.677642	2012	5	Original research	Mixed methods	Surveys and model	﻿Gender was a significant factor in whether the respondents had ever attended a meeting, with men more likely to have participated (p < .001), but was not significant in whether the respondents could name someone involved in the MPA, or in whether they felt their interests were represented by ﻿those responsible for management	Both	Carribean	Multi-site	Results	Primary	Indirect	Observed	Actual	﻿Data relating to participation in management were collected through in-person surveys
1374	Walker, B. L. E., & Robinson, M. A. (2009). Economic development, marine protected areas and gendered access to fishing resources in a Polynesian lagoon. Gender, Place and Culture, 16(4), 467–484. https://doi.org/10.1080/09663690903003983	2009	5				no evidence	Cautious
1375	Aswani, S., & Weiant, P. (2004). Scientific evaluation in women’s participatory management: Monitoring marine invertebrate refugia in the Solomon Islands. Human Organization, 63(3), 301–319. https://doi.org/10.17730/humo.63.3.r7kgd4thktmyf7k1	2004	5	Review	Project review	Monitoring	The most immediate gains for women have been: 1) women hav been made participants in community decisions regarding resource management; 2) their understanding of the valu of the scientific monitoring has grown significantly sinc the project's inception; and 3) they have been empowered financially by the cash en	Positive	Solomon islands	Multi-site	NA- narrative paper	Secondary	Direct	Observed	Actual	Project data collection and information
1377	Kamat, V. R., & Woo Kinshella, M. L. (2018). Food insecurity and coping strategies in a marine protected area in southeastern Tanzania. Ecology of Food and Nutrition, 57(3), 187–205. https://doi.org/10.1080/03670244.2018.1455672	2018	5				no evidence	Cautious
1379	King, M., & Faasili, U. (1999). Community-based management of subsistence fisheries in Samoa. Fisheries Management and Ecology, 6(2), 133–144. https://doi.org/10.1046/j.1365-2400.1999.00136.x	1999	5				no evidence	Supportive
1381	Maliao, R. J., & Polohan, B. B. (2008). Evaluating the impacts of mangrove rehabilitation in Cogtong Bay, Philippines. Environmental Management, 41(3), 414–424. https://doi.org/10.1007/s00267-007-9021-2	2008	5	Original research	Mixed methods	Interviews and model	﻿Women were significantly more negative in their perceptions of household income and fish abundance than their male counterparts, although both had negative scores on these indicators. This was probably caused by women’s keen perception on resource scarcity, which could be attributed to their job multiplicity (Ban˜ez- Sumagaysay 2002). In	Negative	Phillipines	Multi-site	Discussion	Primary	Indirect	Observed	Actual	﻿We interviewed 120 respondents (60 male and 60 female) from 14 villages in 2 municipalities (4 in Candijay and 10 in Mabini)
1383	Kamat, V. R. (2018). Dispossession and disenchantment: The micropolitics of marine conservation in southeastern Tanzania. Marine Policy, 88(December 2017), 261–268. https://doi.org/10.1016/j.marpol.2017.12.002	2018	5	Original research	Qualitative	Interviews and focus groups	﻿Additionally, the narrator's assertion that the on-going dispossession of their lands, harassment related to the collection of firewood for cooking purposes, and the insecurities that cumulatively affect their emotional well-being, reveal the complexities of the social impact of the MPA on local residents, especially on women	Negative	Tanzania	Single-site	NA- narrative paper	Primary	Both	Observed	Actual	﻿A total of 160 individuals were selected through a purposive sam-	﻿Mnazi Bay-Ruvuma Estuary Marine Park	650	Tropical	17	Y	Y	Y	Top down
1385	Faasen, H., & Watts, S. (2007). Local community reaction to the “no-take” policy on fishing in the Tsitsikamma National Park, South Africa. Ecological Economics, 64(1), 36–46. https://doi.org/10.1016/j.ecolecon.2007.06.026	2007	5				no evidence	Cautious
1386	Moshy, V. H., Bryceson, I., & Mwaipopo, R. (2015). Social-ecological Changes, Livelihoods and Resilience among Fishing Communities in Mafia Island Marine Park, Tanzania. Forum for Development Studies, 42(3), 529–553. https://doi.org/10.1080/08039410.2015.1065906	2015	5	Original research	Mixed methods	Interviews and surveys	﻿Women experienced raised household responsibilities for food security and meeting other household needs.	Negative	Tanzania	Single-site	Results and Discussion'	Both	Direct	Observed	Actual	﻿Data were collected through in-depth interviews, focus group discussions, direct observation and questionnaire surveys. Interviewees	Mafia Island Marine Park	822	Tropical	19	Y		Y	Top down	Y	Top down
1387	Pajaro, M. G., Mulrennan, M. E., Alder, J., & Vincent, A. C. J. (2010). Developing MPA Effectiveness Indicators: Comparison Within and Across Stakeholder Groups and Communities. Coastal Management, 38(2), 122–143. https://doi.org/10.1080/08920751003633094	2010	5				no evidence	Unclear
1393	Parsons, M., Taylor, L., & Crease, R. (2021). Indigenous environmental justice within marine ecosystems: A systematic review of the literature on indigenous peoples’ involvement in marine governance and management. Sustainability (Switzerland), 13(8). https://doi.org/10.3390/su13084217	2021	5	Review	Literature review	Overview	﻿In particular, Indigenous women and gender minorities report being unable to (and/or fearful to) speak in governance and management forums (including public consultation and tribal meetings) due to patriarchal gender structures, which means that Indigenous male voices are privileged over Indigenous females and gender minorities [235–240]. Accordingly,	Negative	Global	Conceptual	NA- narrative paper	Secondary	Direct	Assumed	Actual	﻿We reviewed the peer-reviewed English-language research articles between January 2015 and September 2020 for examples of Indigenous peoples’ involvement in marine governance and management using the analytical lens of environmental justice
1395	Gurney, G. G., Pressey, R. L., Cinner, J. E., Pollnac, R., & Campbell, S. J. (2015). Integrated conservation and development: Evaluating a community-based marine protected area project for equality of socioeconomic impacts. Philosophical Transactions of the Royal Society B: Biological Sciences, 370(1681). https://doi.org/10.1098/rstb.2014.0277	2015	5	Original research	Mixed methods	Interviews, surveys and model	﻿Our qualitative data suggest that such a situation occurred in the village of Blongko; female respondents men- tioned that, because they were not involved in decisions about placement of the MPA, access to the reef area used by women for gleaning was significantly restricted	Negative	Indonesia	Multi-site	Discussion	Primary	Direct	Observed	Actual	﻿We used household surveys to gather quantitative data on several socioeconomic indicators, followed by semi- structured interviews with key informants, including heads of vil- lages, members of MPA groups and traditional leaders, to obtain qualitative data. The
1404	Ramírez, A., Ortiz, M., Steenbeek, J., & Christensen, V. (2015). Evaluation of the effects on rockfish and kelp artisanal fisheries of the proposed Mejillones Peninsula marine protected area (northern Chile, SE Pacific coast). Ecological Modelling, 297, 141–153. https://doi.org/10.1016/j.ecolmodel.2014.11.012	2015	5	Original research	Mixed methods	Interviews and model	﻿the MPA proposal core zones, which have a high probability of becoming no-take zones, extend over the central portion of the coastal fringe exploited by kelp gatherers. This situation creates a risk of displacement with potential negative effects on women, who have no means to reach distant sites by boat and who have less easy access to alternative livelihoods. F	Negative	Chile	Conceptual	Discussion	Both	Direct	Observed	Hypothetical	﻿Semi-structured inter- views and mapping with the help of key informants from the cove. ﻿It incorporated information from field studies on biomass and information from the literature on fisheries landings, productivity, consumption rates and trophic interactions between target species and other relevant macrofauna species in the kelp ecosystem
1407	Katsanevakis, S., Coll, M., Fraschetti, S., Giakoumi, S., Goldsborough, D., Mačić, V., Mackelworth, P., Rilov, G., Stelzenmüller, V., Albano, P. G., Bates, A. E., Bevilacqua, S., Gissi, E., Hermoso, V., Mazaris, A. D., Pita, C., Rossi, V., Teff-Seker, Y., & Yates, K. (2020). Twelve Recommendations for Advancing Marine Conservation in European and Contiguous Seas. Frontiers in Marine Science, 7(Oc…	2020	5				no evidence	Supportive
1408	Abecasis, R. C., Schmidt, L., Longnecker, N., & Clifton, J. (2013). Implications of community and stakeholder perceptions of the marine environment and its conservation for MPA management in a small Azorean island. Ocean and Coastal Management, 84, 208–219. https://doi.org/10.1016/j.ocecoaman.2013.08.009	2013	5				no evidence	Cautious
1415	Crawford, B., Herrera, M. D., Hernandez, N., Leclair, C. R., Jiddawi, N., Masumbuko, S., & Haws, M. (2010). Small scale fisheries management: Lessons from cockle harvesters in Nicaragua and Tanzania. Coastal Management, 38(3), 195–215. https://doi.org/10.1080/08920753.2010.483174	2010	5	Review	Project review	Overview	﻿﻿This article describes two initiatives ﻿for co-management of women-dominated cockle﻿(Anadara spp.) fisheries. Participatory monitoring of these “Locally Managed Marine Areas” (LMMAs) has shown increased abundance and size of cockles inside the no-take zones and in adjacent fishing areas	Positive	Tanzania and Nicuaragua	Multi-site	NA- narrative paper	Secondary	Indirect	Observed	Actual	Various grey and published literature
1416	Darling, E. S. (2014). Assessing the effect of marine reserves on household food security in Kenyan coral reef fishing communities. PLoS ONE, 9(11), 1–20. https://doi.org/10.1371/journal.pone.0113614		5				no evidence	Cautious
1419	Arroyo Mina, J. S., Revollo Fernández, D. A., Aguilar Ibarra, A., & Georgantzis, N. (2016). Economic behavior of fishers under climate-related uncertainty: Results from field experiments in Mexico and Colombia. Fisheries Research, 183, 304–317. https://doi.org/10.1016/j.fishres.2016.05.020	2016	5				no evidence	Unclear
1423	Fröcklin, S., Jiddawi, N. S., & De la Torre-Castro, M. (2018). Small-scale innovations in coastal communities: Shell-handicraft as a way to empower women and decrease poverty. Ecology and Society, 23(2). https://doi.org/10.5751/ES-10136-230234	2018	5	Original research	Mixed methods	Interviews	﻿The results show that over time, the women engaged in shell-handicraft have improved their access to a range of resources, mainly physical (house, cell phone, freezer, and electricity), human (knowledge in marketing, leadership, and entrepreneurship), and social (organization). This further resulted in reported improved self-confidence and decision-making authority within the household. Regardin…	Positive	Tanzania	Multi-site	Results	Primary	Direct	Observed	Actual	﻿To capture preconditions and outcomes during a seven year time period (the project’s introduction in 2006 to the time of the study), semistructured interviews were administered to women involved in shell-handicraft (n = 36), as well as a control group consisting of women engaged in other activities such
1425	Ladia, J. R., Charisma Tamayo Malenab, M., & Visco, E. S. (2019). Bridging the gap between gender and marine conservation: The case of calatagan mangrove forest conservation park in Batangas, Philippines. Pertanika Journal of Social Sciences and Humanities, 27(S1), 193–213.	2019	5	Original research	Qualitative	Interviews and focus groups	Since the establishment of CMFCP, the increase of women participating in marine conservation was very evident. At present, all CMCFP executive positions were occupied by women	Positive	Phillipines	Single-site	Conclusion	Primary	Direct	Observed	Actual	﻿Conducted through field interviews, observations, and focus group discussions,
1428	Masud, M. M., & Kari, F. B. (2015). Community attitudes towards environmental conservation behaviour: An empirical investigation within MPAs, Malaysia. Marine Policy, 52, 138–144. https://doi.org/10.1016/j.marpol.2014.10.015	2015	5				no evidence	Cautious
1371	Gustavsson, M., Lindström, L., Jiddawi, N. S., & de la Torre-Castro, M. (2014). Procedural and distributive justice in a community-based managed Marine Protected Area in Zanzibar, Tanzania. Marine Policy, 46, 91–100. https://doi.org/10.1016/j.marpol.2014.01.005	2014	5	Original research	Qualitative	Interview	﻿Women seaweed farmers ofMarumbi did not participate in the VFC or the demarcation of the special-use zone and therefore they could not defend their interests in being protected from Chwaka drag-nets. This	Negative	Tanzania	Single-site	Results	Primary	Direct	Observed	Actual	﻿The study was carried out from August to October, 2012. The method combined semi-structured open-ended interviews (n¼133) [30] and analyses of policy documents. Five
1380	Gill, D. A., Cheng, S. H., Glew, L., Aigner, E., Bennett, N. J., & Mascia, M. B. (2019). Social Synergies, Tradeoffs, and Equity in Marine Conservation Impacts. Annual Review of Environment and Resources, 44, 347–372. https://doi.org/10.1146/annurev-environ-110718-032344	2019	5	Review	Literature review	Overview	﻿In seven of the nine studies that reported gendered impacts, we observed synergistic positive [e.g., increased income, greater energy and protein intake (82, 98)] or negative [e.g., loss of income, food security, and access to fishing grounds (83, 99)] impacts for both women and men	Both	Global	Conceptual	NA- narrative paper	Secondary	Both	Observed	Actual	﻿We reviewed recent literature on the social impacts offour marine conservation interventions to understand the synergies, tradeoffs, and eq- uity (STE) of these impacts
							﻿In two CBMPAs in Kenya, Mahajan & Daw (86) explained that although both women and men perceived increased conflict, female fish traders reported receiving less or no benefits from the tengefus (CBMPAs) compared to male traders
1392	Kleiber, D., Harris, L., & Vincent, A. C. J. (2018). Gender and marine protected areas: a case study of Danajon Bank, Philippines. Maritime Studies, 17(2), 163–175. https://doi.org/10.1007/s40152-018-0107-7	2018	5	Original research	Mixed methods	Interviews	﻿Men were signif- icantly more likely to participate actively than women, and active participation was higher in communities with subtidal MPAs. ﻿the second most common reason women gave for non-attendance was that they were not a man or a fisherman.1 While both men and women cited age and recent immigration to the community as reasons for not attending, no male respondents used gender to explain…	Negative	Phillipines	Multi-site	Results	Primary	Direct	Observed	Actual	﻿We randomly selected 588 adult interview respondents (here defined as 16 or older) from the barangay census of each of the 12 communities
E15	Clabots, B. (2013). Gender Dimensions of Community-Based Management of Marine Protected Areas in Siquijor, Philippines. Masters of Marine Affairs, 1–18.	2013	5	Original research	Mixed methods	Interviews and focus groups	﻿﻿Women were actively engaged in the management of Maite and Bino-ongan’s MPAs. Women’s activities in Maite and Bino-ongan are effective participation under Agarwal’s (1997) definition- that includes formal membership on management committees, attending meetings where they are members, and their views given weight in those meetings.	Positive	Phillipines	Multi-site	Results	Both	Direct	Observed	Actual	﻿A mixed-methods approach was employed consisting of 13 semi-structured qualitative key informant interviews and 4 focus group discussions over the 3 study sites, as well as a review of NGO and government agency documents relevant
E16	Baker-Médard, M. (2017). Gendering Marine Conservation: The Politics of Marine Protected Areas and Fisheries Access. Society and Natural Resources, 30(6), 723–737. https://doi.org/10.1080/08941920.2016.1257078	2017	5	Original research	Qualitative	Interviews	﻿Zara, a 63-year-old woman, is one of just a handful of women in Kobalava,1 a village in northeastern Madagascar, who vividly remember fishing. No women living in Kobalava, I was told, fish anymore. Places where women had traditionally fished on foot are now part of the marine protected area (MPA), and although fishing is still allowed in certain zones around the islands, fishing on foot, diving,…	Negative	Madagascar	Multi-site	NA- narrative paper	Primary	Direct	Observed	Actual	﻿I explore the process of re-gendering through 14 oral histories, 82 semistructured interviews, and more than 13 months of participant observation in primarily 3 sites in Madagascar from 2010 to 2015
